# Supplementary material for: C5-pyrimidine-functionalized morpholino oligonucleotides exhibit differential binding affinity, target specificity and lipophilicity
Source: Royal Society of Chemistry journal article supplement (doi:10.1039/d2ob01759h), 2022-12-30
Supplement: d2ob01759h1.pdf [file d2ob01759h1.pdf]

## Supporting Information

### **C5-Pyrimidine-Functionalized Morpholino Oligonucleotides Exhibit Differential Binding Affinity, Target Specificity and Lipophilicity**

Arnab Das<sup>a‡</sup>, Atanu Ghosh<sup>a‡</sup>, and Surajit Sinha<sup>a\*</sup>

<sup>a</sup>School of Applied and Interdisciplinary Sciences, Indian Association for the Cultivation of Science, Jadavpur, Kolkata 700032, West Bengal, India.

<sup>‡</sup>A.D. and A.G. contributed equally to this work. AD synthesized the modified-U PMOs and AG synthesized modified-C PMOs.

\*ocss5@iacs.res.in

## Contents

|                                                                 |           |
|-----------------------------------------------------------------|-----------|
| 1. Materials and methods.....                                   | S3-S5     |
| 2. Spectral Data .....                                          | S6-S17    |
| 3. NMR Spectra .....                                            | S18-S100  |
| 4. Dimer formation reaction and HPLC analysis .....             | S101-S103 |
| 5. General PMO synthesis cycle in solid phase.....              | S104      |
| 6. HPLC chromatogram of the crude PMO 8 in Trityl-on mode ..... | S105      |
| 7. HPLC and Mass analysis of PMOs.....                          | S106-S130 |
| 8. Thermal Melting Curves.....                                  | S131-S178 |
| 9. CD-spectra of duplexes.....                                  | S179-S182 |
| 10. X-ray crystallographic data of the compound 1g.....         | S183      |
| 11. References.....                                             | S184      |

# 1. Materials and Methods

## 1.1. General chemical methods

All reagents were purchased from commercially available sources and used without further purification, unless specified. Reactions were carried out in oven dried glassware under argon atmosphere. Solvents were purified and dried according to recommended procedures. Thin layer chromatography (TLC) was carried out on sheets of silica gel 60 F254 on aluminium (layer thickness 0.25 mm, Merck). Visualization of the TLC was achieved under UV light and staining of TLC was carried out in standard staining solutions (CAM, Ninhydrin,  $\text{KMnO}_4$ , 2,4-DNP). Chromatographic purification of products was accomplished by column chromatography on silica gel (mesh 60-120 and 100-200).  $^1\text{H}$ ,  $^{13}\text{C}$  and  $^{31}\text{P}$ -NMR spectra were recorded on Bruker NMR spectrometers (300 MHz, 400 MHz and 500 MHz). Chemical shifts ( $\delta$ ) are given in ppm relative to the solvent residual peak or TMS as internal standard. The following abbreviations are used for multiplicity of NMR signals: s = singlet, d = doublet, t = triplet, m = multiplet. High Resolution Mass Spectra (HRMS) were recorded out in a QTOF I (Quadrupole hexapole TOF) mass spectrometer with an orthogonal Z spray electrospray interface on Micro (YA 263) mass spectrometer (Manchester, UK). Matrix-Assisted Laser Desorption Ionization (MALDI) mass spectra were recorded on Bruker UltrafleXtreme MALDITOF/ TOF system. Sinapinic acid (SA) or 3-hydroxypicolinic acid (HPA) was used as a matrix. The LCMS separation was performed on the Agilent 1290 Infinity LC system which was coupled to Agilent 6545 Accurate-Mass Quadrupole Time-of-Flight (QTOF) with an Agilent jet stream Thermal Gradient Technology with electrospray ionization (ESI) source. The suitable MS parameters were optimized and high resolution mass spectra were obtained by performing the analysis in negative ionization mode. HPLC purification of the functionalized 12-mer morpholino oligonucleotides was done on Shimadzu SP-20AD system with C18 (Ascentis) column using 0.1M Ammonium acetate buffer (in  $\text{H}_2\text{O}$ )- $\text{CH}_3\text{CN}$  gradient system (10-50%).

## Synthesis of Morpholino-Oligomers

All PMOs were synthesized in Automated Oligosynthesizer, K&A H-8 DNA/RNA/LNA Synthesizer, K&A Laborgeräte GbR, Germany. Coupling with functionalized chlorophosphoramidate monomers were carried out manually with a coupling time of 1 h (20 min x 3 times).

## DNA and RNA melting experiments and thermodynamic properties

All PMO-DNA and PMO-RNA UV-melting experiments were performed using 2  $\mu\text{M}$  concentration of each strand and 0.04M phosphate buffer (pH 7). UV-Vis spectra were recorded on Cary 3500 UV-Visible spectrometer equipped with Peltier temperature controlling device and thermal software. All the samples were allowed to anneal at 65°C for 5 minutes and then cooled slowly to 15°C at a rate of 1°C/min at 260 nm absorption.

## CD-spectral experiments

Circular Dichroism experiment of all PMO-DNA and PMO-RNA was performed using 2  $\mu\text{M}$  concentration of each strand and 0.04M phosphate buffer in a JASCO J-1500 Spectropolarimeter. All the samples were allowed to anneal at 65°C for 5 minutes and then cooled slowly to 15°C at a rate of 1°C/min. Then all the duplexes were stored at 4°C. All data collection were carried out at 10°C

## 1.2. General synthesis methods

In case of compound **1**, Pd catalyzed Sonogashira cross coupling reactions were carried out using earlier reported procedure<sup>1</sup>.

In case of compound **2**, Pd catalyzed Sonogashira, Suzuki, and Heck coupling reactions were carried out using earlier reported procedure<sup>2</sup>.

**General method for the Suzuki reaction of morpholino uridine:**

Compound **1** (0.1 mmol) was dissolved in 3ml of dioxane followed by the addition of boronic acid (0.2 mmol). After that NaOH (0.3 mmol, 1.5M in water) was added drop wise in the reaction mixture and 1 ml of water was added to maintain the ratio. Finally Pd(PPh<sub>3</sub>)<sub>4</sub> (4-5 mol%) was added in the reaction mixture and heated at 65-70°C (oil bath) for 4-5 hrs. The reaction was monitored by TLC. After completion of the reaction the solvent was evaporated to dryness and extracted with EtOAc. Then solvent was washed repeatedly with water and with brine. Collected organic layer was dried over anhydrous Na<sub>2</sub>SO<sub>4</sub> and solvent was evaporated in vacuo. The compound was purified by silica gel (100-200 mesh) column chromatography using MeOH-DCM as eluent. Trace amount of catalyst impurity was further removed by second time column chromatography eluting with EtOAc-petroleum ether (if necessary).

| Entry | Solvent                    | Base(Eq)                                                        | Catalyst(Eq)                                             | Temperature                   | Result                                                              |
|-------|----------------------------|-----------------------------------------------------------------|----------------------------------------------------------|-------------------------------|---------------------------------------------------------------------|
| 1     | Dry DMF                    | Et <sub>3</sub> N (4)                                           | Pd(PPh <sub>3</sub> ) <sub>4</sub> (0.1)                 | 70 <sup>0</sup> C             | In all cases starting materials were present along with other spots |
| 2     |                            | Cs <sub>2</sub> CO <sub>3</sub> (4)                             | Pd(PPh <sub>3</sub> ) <sub>4</sub> (0.1)                 | 70 <sup>0</sup> C             |                                                                     |
| 3     |                            | Cs <sub>2</sub> CO <sub>3</sub> (4)                             | Pd(OAc) <sub>2</sub> /(O-tolyl) <sub>3</sub> P (0.05/.1) | 80 <sup>0</sup> C             |                                                                     |
| 4     | Dry Dioxane                | KO <sup>t</sup> Bu (4)                                          | Pd(PPh <sub>3</sub> ) <sub>4</sub> (0.1)                 | 90 <sup>0</sup> C             |                                                                     |
| 5     | Distilled Dioxane          | DABCO (4)                                                       | Pd(dba) <sub>2</sub> (0.1)                               | 90 <sup>0</sup> C             |                                                                     |
| 6     |                            | NaOH (4)                                                        |                                                          |                               |                                                                     |
| 7     |                            | K <sub>3</sub> PO <sub>4</sub> (4)                              |                                                          |                               |                                                                     |
| 8     |                            | DABCO (4)                                                       | Pd(PPh <sub>3</sub> ) <sub>4</sub> (0.1)                 |                               |                                                                     |
| 9     |                            | NaOH (4)                                                        |                                                          |                               |                                                                     |
| 10    |                            | K <sub>3</sub> PO <sub>4</sub> (4)                              |                                                          |                               |                                                                     |
| 11    | Dioxane water in 3:1 ratio | DABCO (4)                                                       | Pd(PPh <sub>3</sub> ) <sub>4</sub> (0.1)                 | 80 <sup>0</sup> C             | Desired product was obtained in 58% yield                           |
| 12    |                            | DABCO (4)                                                       | Pd(PPh <sub>3</sub> ) <sub>4</sub> (0.1)                 | 80 <sup>0</sup> C/3hrs        | 58%                                                                 |
| 13    |                            | K <sub>2</sub> CO <sub>3</sub> (3)                              |                                                          | 65 <sup>0</sup> C/10hrs       | 82%                                                                 |
| 14    |                            | Et <sub>3</sub> N (12)                                          | NaOH (3)                                                 | 65 <sup>0</sup> C             | Starting materials was mainly present                               |
| 15    |                            | Pd(PPh <sub>3</sub> ) <sub>4</sub> (0.1)                        |                                                          | 65 <sup>0</sup> C/30mins      | 61%                                                                 |
| 16    |                            | Pd(PPh <sub>3</sub> ) <sub>4</sub> (0.07)                       |                                                          | 65 <sup>0</sup> C/30mins      | 70%                                                                 |
| 17    |                            | <b>Pd(PPh<sub>3</sub>)<sub>4</sub> (0.05)</b>                   |                                                          | <b>65<sup>0</sup>C/1.5hrs</b> | <b>89%</b>                                                          |
| 18    |                            | Pd(PPh <sub>3</sub> ) <sub>4</sub> (0.01)                       |                                                          | 65 <sup>0</sup> C/7 hrs       | 82%                                                                 |
| 19    |                            | Pd(PPh <sub>3</sub> ) <sub>2</sub> Cl <sub>2</sub> (0.05)       |                                                          | 65 <sup>0</sup> C/1hr         | 74%                                                                 |
| 20    |                            | Pd(dppf)Cl <sub>2</sub> .CH <sub>2</sub> Cl <sub>2</sub> (0.05) |                                                          | 65 <sup>0</sup> C/30mins      | 73%                                                                 |
| 21    |                            | Pd(dba) <sub>2</sub> (0.05)                                     |                                                          | 65 <sup>0</sup> C/1hr         | 67%                                                                 |

**Table S1:** various conditions for Suzuki cross-coupling reaction



### **Synthetic procedure for m5C morpholino cytidine (Compound 2c)**

Compound **2a** (2g, 2.7 mmol) was dissolved in dry DCM/CH<sub>3</sub>CN (1:1) under Ar atmosphere followed by the addition of dry Et<sub>3</sub>N (15 equiv, 40.5 mmol). Then the reaction mixture was cooled to 0°C in an ice bath. Freshly distilled POCl<sub>3</sub> (3 equiv, 8.1 equiv) was added to the reaction mixture in a drop wise manner. After that the reaction mixture was stirred for 5 min at 0°C. Then 1,2,4 triazole (10 equiv, 27 mmol) was added to the reaction mixture portion wise. After that it was stirred at 0°C for 30 min more and left for overnight at room temperature. After complete consumption of the starting material (TLC analysis), the solvent was evaporated to dryness and diluted with EtOAc. The organic layer was then washed with saturated NaHCO<sub>3</sub> (4 times), then with water (2 times) and finally with saturated NH<sub>4</sub>Cl (2 times). Collected organic layer was dried on anhydrous Na<sub>2</sub>SO<sub>4</sub> and solvent was evaporated *in vacuo*. The crude was then used for the next step without further purification.

The obtained crude product was then transferred to a sealed tube dissolved in THF (15 ml) followed by the addition of 33% aqueous NH<sub>3</sub> (15 ml). After that the reaction mixture was stirred for 3 hrs. On complete consumption of the starting material the reaction mixture was evaporated to dryness. The reaction mixture was then diluted with water and extracted by DCM (5 times). Collected organic layer was dried on anhydrous Na<sub>2</sub>SO<sub>4</sub> and solvent was evaporated *in vacuo*. The crude product was purified by column chromatography on silica gel (60-120 mesh) to obtain the compound **2c** in 83% yield. (R<sub>f</sub>= 0.5 in 5% MeOH-DCM)

### **General method for the benzoylation of functionalized morpholino cytidines 2, 2c and 3a-j.**

Cytidine was dissolved in dry CH<sub>3</sub>CN followed by addition of phenyl(1H-tetrazol-1-yl)methanone (2 equiv) and then DMAP (1 equiv) under Ar-atmosphere. The reaction mixture was then allowed to stir at 65-70°C for 1.5 hrs under Ar. After completion of the reaction (TLC analysis) the solvent was evaporated to dryness and re-dissolved in EtOAc. The organic layer was washed with saturated NaHCO<sub>3</sub> solution and then water and brine. Collected organic layer was dried on anhydrous Na<sub>2</sub>SO<sub>4</sub> and solvent was evaporated *in vacuo*. The crude product was purified by column chromatography on silica gel (100-200 mesh) to obtain the compounds **4a-l**. EtOAc-Hexane was used as eluent.

### **General method for the Silyl Deprotection of functionalized morpholino cytidine**

Compounds **4a-l** was dissolved in freshly dried THF followed by the addition of tetrabutylammonium fluoride solution (1.5 equiv, 1M in THF) under Ar atmosphere in ice cold condition. Then the reaction mixture was allowed to stir at room temperature for 4-5 hrs. After completion of the reaction (TLC analysis), the solvent was evaporated *in vacuo* and re-dissolved in EtOAc. The organic layer was washed with water for 5-6 times and finally with saturated NH<sub>4</sub>Cl. The collected organic layer was dried on anhydrous Na<sub>2</sub>SO<sub>4</sub> and solvent was evaporated *in vacuo*. The crude product was purified by silica gel (60-120 mesh) column chromatography eluting with Acetone-DCM to obtain the compounds **5a-l**.

### **General method for dimer formation reaction**

Compound **8** (1 equiv) was dissolved in dry DMF, cooled to 0°C followed by the addition of *N*-ethyl morpholine (3 equiv) and ETT (2 equiv). Then the active monomer (1.5 equiv) was added in the reaction medium. The reaction was then left for 45 mins to 1 hr at room temperature. After completion (as analyzed by TLC), the reaction mixture was diluted with ethyl acetate and washed with water and brine. Collected organic layer was dried over anhydrous Na<sub>2</sub>SO<sub>4</sub> and dried *in vacuo*. The crude mixture was purified by column chromatography and characterized by spectroscopic techniques.

## 2. Spectral Data

### Compound 1a

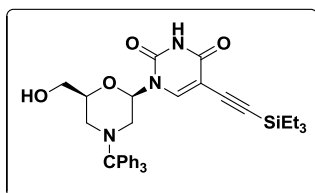

**$^1\text{H}$ -NMR (300 MHz,  $\text{CDCl}_3$ ):**  $\delta$  8.48 (s, 1H), 7.52 – 7.16 (m, 16H), 6.13 (dd,  $J$  = 9.5, 2.3 Hz, 1H), 4.33 – 4.20 (m, 1H), 3.62 (dd,  $J$  = 5.1, 1.9 Hz, 2H), 3.38 (dd,  $J$  = 11.3, 2.5 Hz, 1H), 3.15 – 3.01 (m, 1H), 1.45 (ddd,  $J$  = 17.5, 11.6, 10.1 Hz, 2H), 1.04 – 0.93 (m, 9H), 0.64 (qd,  $J$  = 7.8, 0.9 Hz, 6H).

7.4, 4.2.

**$^{13}\text{C}$ -NMR (75 MHz,  $\text{CDCl}_3$ ):**  $\delta$  160.8, 148.7, 142.5, 129.1, 127.9, 126.5, 100.3, 97.6, 96.1, 81.1, 77.9, 77.4, 77.2, 77.0, 76.7, 76.5, 63.5, 52.1, 48.7,

**HRMS (ESI)  $[\text{M} + \text{Na}]^+$ :** Calculated mass for  $\text{C}_{36}\text{H}_{41}\text{N}_3\text{NaO}_4\text{Si}$  630.2764, found 630.2764.

### Compound 1b

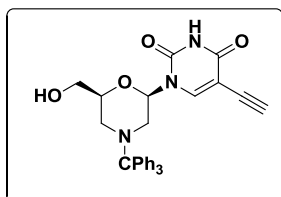

**$^1\text{H}$ -NMR (300 MHz,  $\text{CDCl}_3$ ):**  $\delta$  8.53 (s, 1H), 7.53 (s, 1H), 7.47-7.17 (m, 15H), 6.13 (dd,  $J$  = 9.6, 2.2 Hz), 3.61-3.59 (m, 2H), 3.41 (d,  $J$  = 12 Hz), 3.14 (s, 1H), 3.13-3.09 (d,  $J$  = 12 Hz, 1H), 1.92 (s, 1H), 1.50-1.36 (m, 2H)

**$^{13}\text{C}$ -NMR (75 MHz,  $\text{CDCl}_3$ ):**  $\delta$  160.9, 148.5, 143.6, 129.3, 128.9, 128.1, 127.9, 127.0, 126.8, 99.1, 82.3, 81.2, 78.1, 77.4, 77.3, 77.1, 77.0, 76.8, 74.5, 63.7, 52.4, 48.9

**HRMS (ESI)  $[\text{M} + \text{Na}]^+$ :** Calculated mass for  $\text{C}_{30}\text{H}_{27}\text{N}_3\text{NaO}_4$  516.1899, found 516.1897

### Compound 1c Reported previously<sup>1</sup>

### Compound 1d

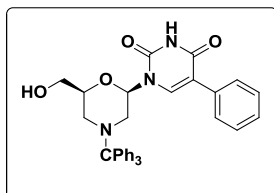

**$^1\text{H}$ -NMR (300 MHz,  $\text{CDCl}_3$ ):**  $\delta$  8.25 (s, 1H), 7.65 – 7.20 (m, 21H), 6.24 (dd,  $J$  = 9.7, 2.4 Hz, 1H), 4.38 – 4.24 (m, 1H), 3.60 (dt,  $J$  = 8.2, 4.5 Hz, 2H), 3.48 – 3.39 (m, 1H), 3.14 – 3.01 (m, 1H), 1.83 (d,  $J$  = 6.7 Hz, 1H), 1.52-1.41 (m, 2H).

**$^{13}\text{C}$ -NMR (100 MHz,  $\text{CDCl}_3$ ):**  $\delta$  161.5, 149.2, 136.9, 132.3, 132.2, 132.0, 132.0, 129.4, 129.4, 129.3, 128.7, 128.6, 128.5, 128.4, 128.2, 128.1, 126.7, 115.4, 81.0, 78.0, 77.6, 77.4, 77.3, 77.1, 76.9, 76.8, 76.5, 76.3, 63.8, 52.3, 48.9

**HRMS (ESI)  $[\text{M} + \text{Na}]^+$ :** Calculated mass for  $\text{C}_{34}\text{H}_{31}\text{N}_3\text{NaO}_4$  568.2212, found 568.2211.

### Compound 1e

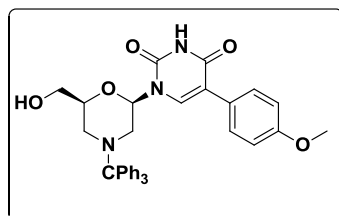

**$^1\text{H}$ -NMR (300 MHz,  $\text{CDCl}_3$ ):**  $\delta$  8.63 (s, 1H), 7.62 – 7.12 (m, 20H), 6.84 (d,  $J$  = 8.8 Hz, 2H), 6.24 (dd,  $J$  = 9.6, 2.4 Hz, 1H), 4.31 (ddd,  $J$  = 6.4, 4.4, 2.2 Hz, 1H), 3.78 (s, 3H), 3.59 (d,  $J$  = 6.2 Hz, 2H), 3.42 (d,  $J$  = 11.3 Hz, 1H), 3.10 (d,  $J$  = 11.8 Hz, 1H), 2.25 (s, 1H), 1.52-1.40 (m, 2H).

**$^{13}\text{C}$ -NMR (100 MHz,  $\text{CDCl}_3$ ):**  $\delta$  161.9, 159.6, 149.3, 136.0, 132.3, 132.2, 129.5, 129.3, 128.7, 128.5, 128.0, 126.7, 124.5, 115.1, 114.0, 80.9, 77.9, 77.4, 77.1, 76.8, 63.7, 55.4, 52.3, 48.9

**HRMS (ESI)  $[\text{M} + \text{Na}]^+$ :** Calculated mass for  $\text{C}_{35}\text{H}_{33}\text{N}_3\text{NaO}_5$  598.2318, found 598.2316 .

### Compound 1f

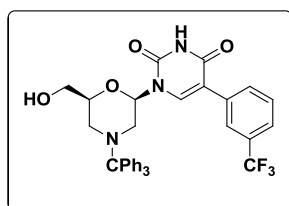

**$^1\text{H}$ -NMR (300 MHz,  $\text{CDCl}_3$ ):**  $\delta$  8.86 (s, 1H), 7.59 – 7.22 (m, 20H), 6.26 (dd,  $J$  = 9.7, 2.4 Hz, 1H), 4.40 – 4.25 (m, 1H), 3.62 (d,  $J$  = 5.2 Hz, 2H), 3.45 (d,  $J$  = 11.3 Hz, 1H), 3.12 (d,  $J$  = 11.9 Hz, 1H), 2.18 (s, 1H), 1.48 (dt,  $J$  = 11.9, 9.9 Hz, 2H).

$^{13}\text{C}$  –NMR (100 MHz,  $\text{CDCl}_3$ ):  $\delta$  161.4, 149.1, 137.6, 132.9, 132.3, 132.2, 132.1, 132.0, 131.7, 131.4, 131.1, 130.8, 130.4, 129.3, 129.0, 128.7, 128.6, 128.1, 126.7, 125.1, 125.0, 124.8, 124.8, 122.6, 114.1, 81.0, 78.1, 77.4, 77.3, 77.1, 77.0, 76.8, 63.7, 52.3, 48.8

**HRMS (ESI) [M + Na] $^+$** : Calculated mass for  $\text{C}_{35}\text{H}_{30}\text{F}_3\text{N}_3\text{NaO}_4$  636.2086, found 636.2087

#### Compound 1g

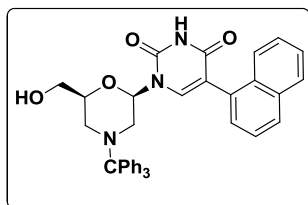

$^1\text{H}$  –NMR (300MHz,  $\text{CDCl}_3$ ):  $\delta$  8.73 (s, 1H), 7.85 (d,  $J$  = 7.3 Hz, 2H), 7.58 – 7.09 (m, 22H), 6.29 (dd,  $J$  = 9.6, 2.3 Hz, 1H), 4.36 – 4.23 (m, 1H), 3.63 – 3.41 (m, 3H), 3.07 (d,  $J$  = 11.9 Hz, 1H), 1.92 (s, 1H), 1.54 – 1.33 (m, 2H).

$^{13}\text{C}$  –NMR (100 MHz,  $\text{CDCl}_3$ ):  $\delta$  161.9, 149.6, 139.1, 133.8, 132.2, 129.3, 128.6, 128.4, 128.0, 126.7, 126.5, 126.1, 125.3, 125.2, 114.5, 80.9, 77.9, 77.4, 77.3, 77.1, 76.9, 76.8, 63.7, 52.3, 48.9.

**HRMS (ESI) [M + Na] $^+$** : Calculated mass for  $\text{C}_{38}\text{H}_{33}\text{N}_3\text{NaO}_4$  618.2369, found 618.2366

#### Compound 1h

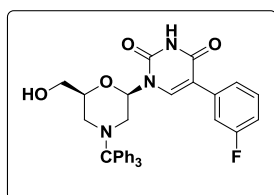

$^1\text{H}$  –NMR (300 MHz,  $\text{CDCl}_3$ ):  $\delta$  9.13 (d,  $J$  = 16.7 Hz, 1H), 7.59 – 7.09 (m, 20H), 6.98-6.92 (m, 1H), 6.25 (dd,  $J$  = 9.6, 2.4 Hz, 1H), 4.35-4.31 (m, 1H), 3.61 (d,  $J$  = 5.4 Hz, 2H), 3.49 – 3.38 (m, 1H), 3.11 (d,  $J$  = 11.9 Hz, 1H), 2.44 (s, 1H), 1.51-1.43 (m, 2H).

$^{13}\text{C}$  –NMR (100 MHz,  $\text{CDCl}_3$ ):  $\delta$  164.3, 161.6, 161.0, 149.2, 137.4, 134.2, 134.0, 132.2, 132.1, 130.0, 129.9, 129.4, 129.2, 128.7, 128.6, 128.0, 126.7, 123.8, 123.7, 115.5, 115.2, 115.1, 114.8, 114.1, 81.0, 78.0, 77.5, 77.3, 77.1, 76.9, 76.7, 63.6, 52.3, 48.8

**HRMS (ESI) [M + Na] $^+$** : Calculated mass for  $\text{C}_{34}\text{H}_{30}\text{FN}_3\text{NaO}_4$  586.2118, found 586.2119

#### Compound 1i

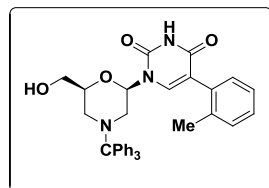

$^1\text{H}$  –NMR (300 MHz,  $\text{CDCl}_3$ ):  $\delta$  9.07 (s, 1H), 7.56 – 7.07 (m, 20H), 6.26 (dd,  $J$  = 9.7, 2.4 Hz, 1H), 4.28 (dq,  $J$  = 6.4, 2.2 Hz, 1H), 3.54 (t,  $J$  = 5.1 Hz, 2H), 3.43 (dt,  $J$  = 11.3, 2.4 Hz, 1H), 3.09 (dt,  $J$  = 12.0, 2.3 Hz, 1H), 2.16 (s, 3H), 1.85 (s, 1H), 1.49-1.36 (m, 2H).

$^{13}\text{C}$  –NMR (100 MHz,  $\text{CDCl}_3$ ):  $\delta$  161.7, 149.7, 138.2, 137.7, 132.2, 132.1, 131.7, 130.6, 130.4, 129.2, 128.7, 128.6, 128.5, 128.0, 126.7, 125.9, 115.7, 80.6, 77.7, 77.4, 77.3, 77.1, 76.9, 76.8, 63.6, 52.3, 48.9, 20.1

**HRMS (ESI) [M + Na] $^+$** : Calculated mass for  $\text{C}_{35}\text{H}_{33}\text{N}_3\text{NaO}_4$  582.2369, found 582.2365.

#### Compound 1j

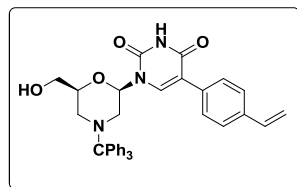

$^1\text{H}$  –NMR (300 MHz,  $\text{CDCl}_3$ ):  $\delta$  9.01 (s, 1H), 7.52 – 7.18 (m, 20H), 6.67 (dd,  $J$  = 17.6, 10.9 Hz, 1H), 6.25 (dd,  $J$  = 9.6, 2.3 Hz, 1H), 5.72 (dd,  $J$  = 17.6, 0.9 Hz, 1H), 5.24 (dd,  $J$  = 10.8, 0.9 Hz, 1H), 4.32 (ddd,  $J$  = 8.5, 4.4, 2.1 Hz, 1H), 3.59 (d,  $J$  = 5.7 Hz, 2H), 3.43 (d,  $J$  = 11.3 Hz, 1H), 3.10 (d,  $J$  = 11.9 Hz, 1H), 2.47 (s, 1H), 1.51-1.40 (m, 2H).

$^{13}\text{C}$  –NMR (100 MHz,  $\text{CDCl}_3$ ):  $\delta$  161.8, 149.3, 137.4, 136.8, 136.3, 132.2, 132.1, 132.1, 131.5, 129.3, 128.7, 128.5, 128.3, 128.0, 126.7, 126.3, 115.0, 114.4, 80.9, 78.0, 77.4, 77.3, 77.1, 76.9, 76.8, 63.7, 52.3, 48.9

**HRMS (ESI) [M + Na] $^+$** : Calculated mass for  $\text{C}_{36}\text{H}_{33}\text{N}_3\text{NaO}_4$  594.2369, found 594.2367

### Compound 1k

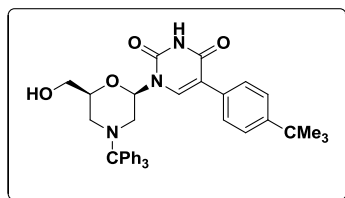

$^1\text{H-NMR}$  (300 MHz,  $\text{CDCl}_3$ ):  $\delta$  8.96 (s, 1H), 7.59 – 7.12 (m, 21H), 6.27 (dd,  $J = 9.6, 2.3$  Hz, 1H), 4.40 – 4.27 (m, 1H), 3.58 (dt,  $J = 7.4, 3.9$  Hz, 2H), 3.44 (dt,  $J = 11.4, 2.4$  Hz, 1H), 3.10 (dt,  $J = 12.0, 2.3$  Hz, 1H), 2.31 (t,  $J = 5.9$  Hz, 1H), 1.55 – 1.36 (m, 2H), 1.30 (s, 9H).

$^{13}\text{C-NMR}$  (100 MHz,  $\text{CDCl}_3$ ):  $\delta$  162.0, 151.2, 149.4, 136.7, 129.2, 128.0, 126.7, 125.5, 115.3, 80.9, 77.9, 77.4, 77.1, 77.0, 76.9, 63.7, 52.3,

48.9, 34.6, 31.3.

**HRMS (ESI)  $[\text{M} + \text{Na}]^+$** : Calculated mass for  $\text{C}_{38}\text{H}_{39}\text{N}_3\text{NaO}_4$  624.2838, found 624.2839

### Compound 1l

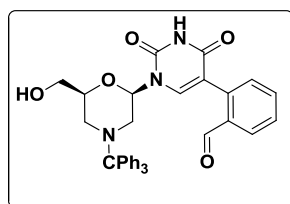

$^1\text{H-NMR}$  (300 MHz,  $\text{CDCl}_3$ ):  $\delta$  9.88 (s, 1H), 8.78 (s, 1H), 7.89 (d,  $J = 7.4$  Hz, 1H), 7.58 – 7.18 (m, 19H), 6.25 (dd,  $J = 9.6, 2.4$  Hz, 1H), 4.31 (dd,  $J = 6.9, 3.7$  Hz, 1H), 3.68 – 3.51 (m, 2H), 3.47 (d,  $J = 11.5$  Hz, 1H), 3.08 (d,  $J = 11.9$  Hz, 1H), 2.15 – 2.00 (m, 1H), 1.53 – 1.35 (m, 2H).

$^{13}\text{C-NMR}$  (100 MHz,  $\text{CDCl}_3$ ):  $\delta$  191.2, 161.8, 161.7, 149.4, 138.5, 135.1, 133.8, 131.5, 130.3, 129.3, 129.1, 128.1, 126.7, 113.3, 81.0, 77.9, 77.4, 77.3, 77.1, 77.0, 76.8, 63.7, 52.3, 48.9

**HRMS (ESI)  $[\text{M} + \text{Na}]^+$** : Calculated mass for  $\text{C}_{35}\text{H}_{31}\text{N}_3\text{NaO}_5$  596.2161, found 596.2163

### Compound 2c

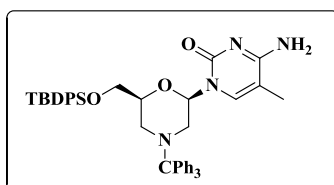

$^1\text{H-NMR}$  (300 MHz,  $\text{CDCl}_3$ ):  $\delta$  7.66 – 7.12 (m, 26H), 7.01 (d,  $J = 1.1$  Hz, 1H), 6.19 (dd,  $J = 9.4, 2.3$  Hz, 1H), 4.32 – 4.19 (m, 1H), 3.79 – 3.69 (m, 1H), 3.60 (dd,  $J = 10.5, 5.9$  Hz, 1H), 3.47 – 3.39 (m, 1H), 3.32 – 3.22 (m, 1H), 2.06 (d,  $J = 5.8$  Hz, 1H), 1.75 (s, 3H), 1.51 (d,  $J = 1.4$  Hz, 1H), 1.22 (d,  $J = 1.6$  Hz, 1H), 0.97 (s, 9H).

$^{13}\text{C-NMR}$  (100 MHz,  $\text{CDCl}_3$ ):  $\delta$  165.2, 154.6, 138.5, 135.6, 135.5, 133.4,

133.2, 129.8, 129.7, 129.3, 127.8, 127.7, 127.7, 126.4, 81.3, 77.5, 77.3, 77.1, 76.9, 76.9, 76.7, 64.7, 52.8, 50.1, 26.8, 19.3, 13.0.

**HRMS (ESI)  $[\text{M} + \text{H}]^+$** : Calculated mass for  $\text{C}_{45}\text{H}_{49}\text{N}_4\text{O}_3\text{Si}$  721.3576, found 721.3575

### Compound 3a

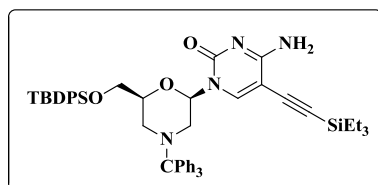

$^1\text{H-NMR}$  (300 MHz,  $\text{CDCl}_3$ ):  $\delta$  7.60 – 7.18 (m, 27H), 6.16 (dd,  $J = 9.2, 2.2$  Hz, 1H), 5.70 (s, 1H), 4.32 – 4.16 (m, 1H), 3.73 (dd,  $J = 10.7, 4.6$  Hz, 1H), 3.59 (dd,  $J = 10.6, 5.5$  Hz, 1H), 3.48 (d,  $J = 11.0$  Hz, 1H), 3.30 – 3.17 (m, 1H), 1.56 – 1.40 (m, 1H), 1.19 (dd,  $J = 11.1, 9.3$  Hz, 1H), 1.02 – 0.90 (m, 18H), 0.72 – 0.59 (m, 6H).

$^{13}\text{C-NMR}$  (75 MHz,  $\text{CDCl}_3$ ):  $\delta$  158.9, 143.8, 141.6, 135.6, 135.6,

133.3, 133.1, 132.8, 129.9, 129.3, 128.3, 128.0, 127.9, 127.8, 126.6, 96.5, 82.0, 77.8, 77.5, 77.3, 77.1, 76.9, 76.8, 76.7, 64.5, 52.7, 49.7, 26.8, 19.3, 7.6, 4.4.

**HRMS (ESI)  $[\text{M} + \text{Na}]^+$** : Calculated mass for  $\text{C}_{52}\text{H}_{61}\text{N}_4\text{O}_3\text{Si}_2$  845.4282, found 845.4280

### Compound 3b-d, 3f-j reported previously<sup>2</sup>

### Compound 3e

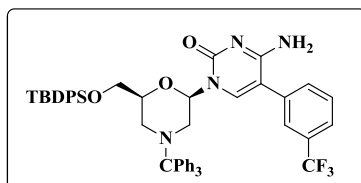

$^1\text{H-NMR}$  (300 MHz,  $\text{CDCl}_3$ ):  $\delta$  8.49 (s, 1H), 7.64 – 7.17 (m, 31H), 6.20 (d,  $J = 7.1$  Hz, 1H), 5.17 (s, 1H), 4.33 – 4.18 (m, 1H), 3.70 (dd,  $J = 10.6, 4.4$  Hz, 1H), 3.60 – 3.54 (m, 1H), 3.50 (dt,  $J = 11.2, 2.6$  Hz, 1H),

3.25 (d,  $J = 11.4$  Hz, 1H), 1.47 (t,  $J = 11.1$  Hz, 1H), 1.27 – 1.18 (m, 1H), 0.91 (s, 9H).

$^{13}\text{C-NMR}$  (100 MHz,  $\text{CDCl}_3$ ):  $\delta$  163.8, 154.5, 140.0, 135.5, 135.5, 134.1, 133.3, 132.8, 130.0, 129.8, 129.7, 129.4, 127.9, 127.7, 126.4, 126.1, 125.4, 122.4, 107.2, 81.7, 77.4, 77.3, 77.2, 77.1, 77.0, 76.9, 76.8, 64.6, 53.0, 50.0, 26.7, 19.2.

**HRMS (ESI)  $[\text{M} + \text{Na}]^+$** : Calculated mass for  $\text{C}_{51}\text{H}_{49}\text{F}_3\text{N}_4\text{O}_3\text{SiNa}$  873.3424, found 873.3422

#### Compound 4a

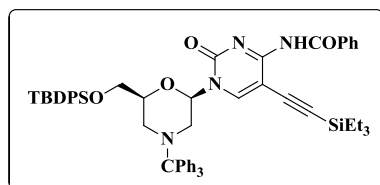

$^1\text{H-NMR}$  (300 MHz,  $\text{CDCl}_3$ ):  $\delta$  13.28 (s, 1H), 8.27 (s, 2H), 7.73 – 7.12 (m, 31H), 6.12 (d,  $J = 7.1$  Hz, 1H), 4.28 (dt,  $J = 7.2$ , 2.1 Hz, 1H), 3.75 (dd,  $J = 10.8$ , 4.6 Hz, 1H), 3.63 (dd,  $J = 10.8$ , 5.3 Hz, 1H), 3.47 (d,  $J = 11.1$  Hz, 1H), 3.31 – 3.19 (m, 1H), 1.64 – 1.49 (m, 2H), 1.35 (dd,  $J = 13.2$ , 5.8 Hz, 1H), 1.08 – 0.89 (m, 17H), 0.77 – 0.58 (m, 6H).

$^{13}\text{C-NMR}$  (75 MHz,  $\text{CDCl}_3$ ):  $\delta$  158.9, 143.8, 141.6, 135.6, 135.6, 133.3, 133.1, 132.8, 129.9, 129.3, 128.3, 127.9, 127.8, 126.6, 96.5, 82.0, 77.8, 77.5, 77.3, 77.1, 76.9, 76.8, 76.7, 64.5, 52.7, 49.7, 26.8, 19.3, 7.6, 4.4.

**HRMS (ESI)  $[\text{M} + \text{Na}]^+$** : Calculated mass for  $\text{C}_{59}\text{H}_{64}\text{N}_4\text{NaO}_4\text{Si}_2$  971.4364, found 971.4367

#### Compound 4b

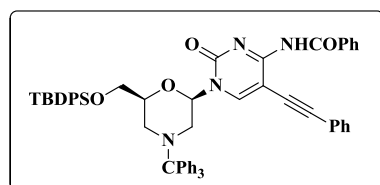

$^1\text{H-NMR}$  (300 MHz,  $\text{CDCl}_3$ ):  $\delta$  8.32 (d,  $J = 7.5$  Hz, 2H), 7.73 – 7.15 (m, 36H), 6.15 (dd,  $J = 9.3$ , 2.3 Hz, 1H), 4.32 (dt,  $J = 7.4$ , 2.2 Hz, 1H), 3.77 (dd,  $J = 10.7$ , 4.8 Hz, 1H), 3.65 (dd,  $J = 10.8$ , 5.3 Hz, 1H), 3.51 (dt,  $J = 11.2$ , 2.4 Hz, 1H), 3.28 (dt,  $J = 12.0$ , 2.4 Hz, 1H), 1.55 (dd,  $J = 12.0$ , 10.4 Hz, 1H), 1.33 (dd,  $J = 11.2$ , 9.3 Hz, 1H), 0.99 (s, 9H).

$^{13}\text{C-NMR}$  (75 MHz,  $\text{CDCl}_3$ ):  $\delta$  158.6, 143.1, 135.6, 133.2, 132.8, 131.6, 129.9, 129.3, 128.8, 128.5, 128.4, 128.0, 127.9, 127.8, 126.6, 81.9, 80.6, 77.8, 77.5, 77.3, 77.1, 76.9, 76.7, 64.6, 52.8, 49.7, 26.8, 19.3.

**HRMS (ESI)  $[\text{M} + \text{Na}]^+$** : Calculated mass for  $\text{C}_{59}\text{H}_{54}\text{N}_4\text{NaO}_4\text{Si}$  933.3812, found 933.3815

#### Compound 4c

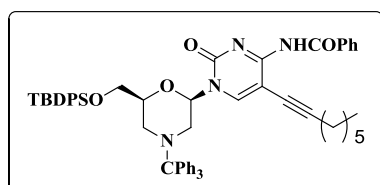

$^1\text{H-NMR}$  (300 MHz,  $\text{CDCl}_3$ ):  $\delta$  8.26 (d,  $J = 7.6$  Hz, 2H), 7.69 – 7.16 (m, 31H), 6.13 (dd,  $J = 9.4$ , 2.3 Hz, 1H), 4.30 (dt,  $J = 7.4$ , 2.1 Hz, 1H), 3.83 – 3.69 (m, 1H), 3.61 (dd,  $J = 10.7$ , 5.5 Hz, 1H), 3.54 – 3.43 (m, 1H), 3.28 (dd,  $J = 11.9$ , 2.3 Hz, 1H), 2.43 (t,  $J = 7.0$  Hz, 2H), 1.62 (dd,  $J = 8.4$ , 7.0 Hz, 2H), 1.47 (dd,  $J = 5.9$ , 3.0 Hz, 2H), 1.36 – 1.24 (m, 5H), 0.99 (s, 8H), 0.91 (d,  $J = 6.3$  Hz, 2H).

$^{13}\text{C-NMR}$  (100 MHz,  $\text{CDCl}_3$ ):  $\delta$  169.0, 160.5, 159.2, 153.4, 144.6, 142.8, 135.6, 135.6, 133.2, 133.2, 132.7, 130.8, 129.9, 129.8, 129.3, 128.6, 128.3, 128.0, 127.8, 127.8, 127.8, 126.6, 126.4, 108.4, 101.2, 96.2, 83.1, 81.7, 77.6, 77.4, 77.1, 76.9, 76.8, 71.4, 67.1, 64.8, 64.6, 53.3, 52.7, 50.0, 49.8, 31.5, 31.4, 28.7, 26.8, 22.6, 22.5, 19.7, 19.3, 14.1.

**HRMS (ESI)  $[\text{M} + \text{H}]^+$** : Calculated mass for  $\text{C}_{59}\text{H}_{63}\text{N}_4\text{O}_4\text{Si}$  919.4619, found 919.4616

#### Compound 4d

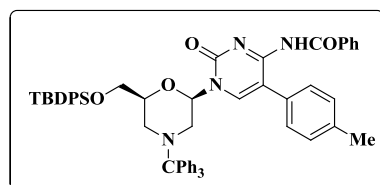

$^1\text{H-NMR}$  (300 MHz,  $\text{CDCl}_3$ ):  $\delta$  13.62 (s, 1H), 8.14 (d,  $J = 7.6$  Hz, 2H), 7.58 – 7.15 (m, 35H), 6.19 (dd,  $J = 9.4$ , 2.3 Hz, 1H), 4.36 – 4.19 (m, 1H), 3.71 (dd,  $J = 10.6$ , 4.6 Hz, 1H), 3.58 (dd,  $J = 10.6$ , 5.8 Hz, 1H), 3.47 (d,  $J = 11.2$  Hz, 1H), 3.26 (d,  $J = 12.0$  Hz, 1H), 2.38 (s, 3H), 1.51 – 1.31 (m, 2H), 0.94 (s, 9H).

$^{13}\text{C-NMR}$  (100 MHz,  $\text{CDCl}_3$ ):  $\delta$  158.5, 138.3, 137.9, 135.6, 135.5, 133.2, 132.5, 130.1, 130.0, 129.9, 129.8, 129.5, 129.3, 128.9, 128.2, 128.0, 127.8, 126.6, 81.4, 77.4, 77.3, 77.1, 76.8, 64.6, 52.6, 50.0, 26.8, 21.3, 19.3

**HRMS (ESI) [M + H]<sup>+</sup>**: Calculated mass for C<sub>58</sub>H<sub>57</sub>N<sub>4</sub>O<sub>4</sub>Si 901.4149, found 901.4146

**Compound 4e**

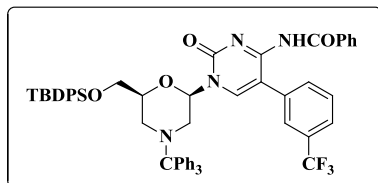

**<sup>1</sup>H-NMR (300 MHz, CDCl<sub>3</sub>)**: δ 13.65 (s, 1H), 8.17 (d, *J* = 7.6 Hz, 2H), 7.98 (s, 1H), 7.43 (m, 7.60-7.18, 33H), 6.33 – 6.19 (m, 1H), 4.41 – 4.27 (m, 1H), 3.77 (q, *J* = 5.0, 3.0 Hz, 1H), 3.68 (dd, *J* = 9.1, 3.7 Hz, 1H), 3.56 (d, *J* = 11.2 Hz, 1H), 3.31 (d, *J* = 11.9 Hz, 1H), 1.60 (t, *J* = 11.2 Hz, 1H), 1.50 – 1.39 (m, 1H), 0.97 (s, 9H).

**<sup>13</sup>C-NMR (100 MHz, CDCl<sub>3</sub>)**: δ 179.8, 157.9, 146.9, 138.8, 136.9, 135.5, 135.4, 133.7, 133.2, 132.7, 132.4, 130.1, 130.0, 129.9, 129.8, 129.3, 128.7, 128.7, 128.2, 128.2, 128.0, 127.7, 127.2, 127.2, 126.7, 124.6, 114.8, 81.5, 77.7, 77.4, 77.3, 77.1, 77.0, 76.8, 64.5, 52.7, 49.8, 26.8, 26.7, 19.3.

**HRMS (ESI) [M + H]<sup>+</sup>**: Calculated mass for C<sub>58</sub>H<sub>54</sub>F<sub>3</sub>N<sub>4</sub>O<sub>4</sub>Si 955.3866, found 955.3863

**Compound 4f**

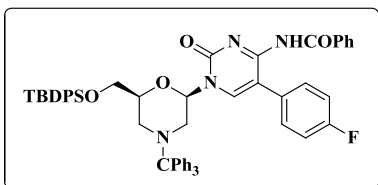

**<sup>1</sup>H-NMR (300 MHz, CDCl<sub>3</sub>)**: δ 13.60 (s, 1H), 8.12 (d, *J* = 7.0 Hz, 2H), 7.62 – 7.16 (m, 31H), 7.04 (t, *J* = 8.7 Hz, 2H), 6.20 (dd, *J* = 9.4, 2.3 Hz, 1H), 4.36 – 4.22 (m, 1H), 3.73 (dd, *J* = 10.7, 4.5 Hz, 1H), 3.62 (dd, *J* = 10.7, 5.6 Hz, 1H), 3.50 (dt, *J* = 11.2, 2.4 Hz, 1H), 3.27 (dd, *J* = 11.9, 2.4 Hz, 1H), 1.53 (d, *J* = 1.5 Hz, 1H), 1.38 (dd, *J* = 11.2, 9.4 Hz, 1H), 0.94 (s, 9H).

**<sup>13</sup>C-NMR (100 MHz, CDCl<sub>3</sub>)**: δ 163.9, 161.4, 158.3, 147.0, 138.4, 135.6, 135.5, 133.2, 132.6, 131.5, 131.4, 130.1, 129.9, 129.8, 129.3, 128.2, 128.0, 127.8, 126.7, 115.2, 115.0, 81.5, 77.7, 77.4, 77.3, 77.1, 77.0, 76.8, 64.6, 52.7, 49.9, 26.8, 19.3.

**HRMS (ESI) [M + H]<sup>+</sup>**: Calculated mass for C<sub>57</sub>H<sub>54</sub>FN<sub>4</sub>O<sub>4</sub>Si 905.3898, found 905.3892

**Compound 4g**

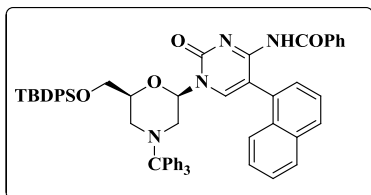

**<sup>1</sup>H-NMR (300 MHz, CDCl<sub>3</sub>)**: δ 13.47 (s, 1H), 7.89 (s, 2H), 7.72 – 7.09 (m, 37H), 6.27 (td, *J* = 9.7, 4.7 Hz, 1H), 4.38 – 4.22 (m, 1H), 3.69 (td, *J* = 10.0, 9.2, 5.1 Hz, 1H), 3.52 (ddd, *J* = 19.7, 10.5, 5.8 Hz, 2H), 3.27 (d, *J* = 11.9 Hz, 1H), 1.51 – 1.36 (m, 2H), 0.89 (d, *J* = 3.5 Hz, 9H).

**<sup>13</sup>C-NMR (100 MHz, CDCl<sub>3</sub>)**: δ 158.8, 140.1, 135.6, 135.5, 135.4, 133.6, 132.3, 129.9, 129.8, 129.7, 129.3, 129.1, 129.1, 128.7, 128.4, 128.3, 128.0, 127.9, 127.8, 127.7, 127.7, 127.6, 126.6, 126.1, 125.9, 125.3, 125.2, 81.6, 81.3, 77.4, 77.3, 77.1, 77.0, 76.8, 64.5, 52.7, 49.9, 26.8, 19.2.

**HRMS (ESI) [M + H]<sup>+</sup>**: Calculated mass for C<sub>61</sub>H<sub>57</sub>N<sub>4</sub>O<sub>4</sub>Si 937.4149, found 937.4146

**Compound 4h**

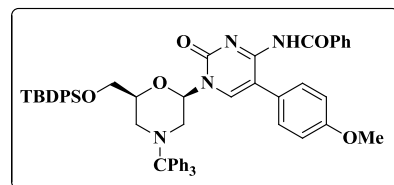

**<sup>1</sup>H-NMR (300 MHz, CDCl<sub>3</sub>)**: δ 13.59 (s, 1H), 8.20 – 8.06 (m, 2H), 7.59 – 7.17 (m, 33H), 6.88 (d, *J* = 8.7 Hz, 2H), 6.20 (dd, *J* = 9.5, 2.3 Hz, 1H), 4.29 (d, *J* = 9.8 Hz, 1H), 3.83 (s, 3H), 3.73 (dd, *J* = 10.7, 4.5 Hz, 1H), 3.59 (dd, *J* = 10.6, 5.8 Hz, 1H), 3.48 (d, *J* = 11.2 Hz, 1H), 3.27 (d, *J* = 12.0 Hz, 1H), 1.47 – 1.30 (m, 2H), 0.94 (s, 8H).

**<sup>13</sup>C-NMR (100 MHz, CDCl<sub>3</sub>)**: δ 159.6, 158.6, 137.9, 137.3, 135.6, 135.6, 133.33, 132.5, 130.9, 130.1, 129.9, 129.8, 129.3, 128.2, 128.0, 127.9, 127.8, 126.6, 125.4, 113.7, 81.5, 77.6, 77.4, 77.3, 77.1, 77.0, 76.8, 64.6, 55.5, 52.6, 50.0, 26.9, 19.3.

**HRMS (ESI) [M + Na]<sup>+</sup>**: Calculated mass for C<sub>58</sub>H<sub>56</sub>N<sub>4</sub>NaO<sub>5</sub>SiNa 939.3918, found 939.3915

**Compound 4i**

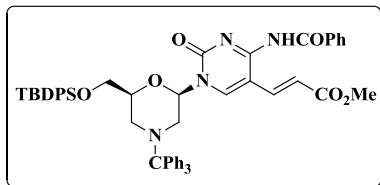

**<sup>1</sup>H-NMR (300 MHz, CDCl<sub>3</sub>):** δ 13.51 (s, 1H), 8.30 – 8.21 (m, 2H), 7.62 – 7.23 (m, 32H), 6.88 (d, *J* = 15.9 Hz, 1H), 6.14 (dd, *J* = 9.4, 2.3 Hz, 1H), 4.32 (d, *J* = 9.5 Hz, 1H), 3.78 (s, 4H), 3.65 (dd, *J* = 10.7, 5.8 Hz, 1H), 3.48 (d, *J* = 11.6 Hz, 1H), 3.31 (d, *J* = 12.0 Hz, 1H), 1.51 (t, *J* = 11.2 Hz, 1H), 1.31 (dd, *J* = 11.0, 9.1 Hz, 1H), 1.00 (s, 9H).

**<sup>13</sup>C-NMR (100 MHz, CDCl<sub>3</sub>):** δ 180.1, 167.5, 157.2, 146.3, 141.3, 136.7, 136.3, 135.6, 135.5, 133.2, 132.8, 130.1, 129.9, 129.2, 128.4, 128.0, 127.9, 127.8, 126.7, 119.7, 110.0, 81.6, 77.8, 77.4, 77.3, 77.1, 76.9, 76.8, 64.6, 52.8, 51.7, 49.9, 26.8, 19.3.

**HRMS (ESI) [M + H]<sup>+</sup>:** Calculated mass for C<sub>55</sub>H<sub>55</sub>N<sub>4</sub>O<sub>6</sub>Si 895.3891, found 895.3887

#### Compound 4j

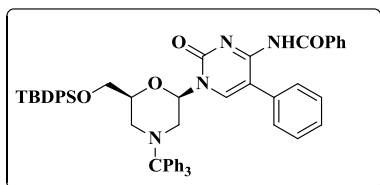

**<sup>1</sup>H-NMR (300 MHz, CDCl<sub>3</sub>):** δ 13.25 (s, 1H), 8.42 – 8.30 (m, 2H), 7.69 (s, 1H), 7.64 – 7.20 (m, 31H), 6.08 (dd, *J* = 9.5, 2.3 Hz, 1H), 4.35 – 4.21 (m, 1H), 3.75 (dd, *J* = 10.7, 4.6 Hz, 1H), 3.63 (dd, *J* = 10.7, 5.6 Hz, 1H), 3.45 (d, *J* = 11.3 Hz, 1H), 3.27 (d, *J* = 11.9 Hz, 1H), 1.55 – 1.46 (m, 1H), 1.30 (dd, *J* = 11.6, 2.1 Hz, 1H), 0.99 (s, 9H).

**<sup>13</sup>C-NMR (75 MHz, CDCl<sub>3</sub>):** δ 156.7, 146.9, 145.4, 136.7, 135.6, 133.2, 133.1, 132.9, 130.3, 129.9, 129.2, 128.3, 128.0, 127.9, 127.8, 127.8, 126.6, 81.7, 77.8, 77.5, 77.3, 77.1, 76.9, 76.7, 64.5, 52.6, 49.8, 26.8, 19.3.

**HRMS (ESI) [M + H]<sup>+</sup>:** Calculated mass for C<sub>57</sub>H<sub>55</sub>N<sub>4</sub>O<sub>4</sub>Si 887.3993, found 887.3993

#### Compound 4k

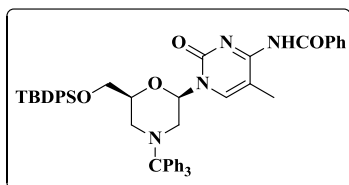

**<sup>1</sup>H-NMR (300 MHz, CDCl<sub>3</sub>):** δ 13.28 (s, 1H), 8.30 (dd, *J* = 7.0, 1.3 Hz, 2H), 7.68 – 7.08 (m, 30H), 6.24 – 6.08 (m, 1H), 4.35 – 4.19 (m, 1H), 3.75 (ddd, *J* = 10.6, 4.4, 1.3 Hz, 1H), 3.63 (ddd, *J* = 10.6, 5.6, 1.3 Hz, 1H), 3.40 (d, *J* = 11.1 Hz, 1H), 3.28 (d, *J* = 11.8 Hz, 1H), 1.94 (s, 3H), 1.64 – 1.49 (m, 2H), 1.41 – 1.33 (m, 1H), 0.97 (d, *J* = 1.2 Hz, 9H).

**<sup>13</sup>C-NMR (75 MHz, CDCl<sub>3</sub>):** δ 179.6, 159.7, 147.5, 137.3, 136.8, 135.6, 135.6, 133.4, 133.2, 132.5, 130.0, 129.9, 129.8, 129.3, 128.2, 128.0,

127.8, 126.6, 111.4, 81.0, 77.6, 77.3, 77.1, 76.9, 76.7, 64.6, 52.4, 49.9, 26.8, 19.3, 13.5.

**HRMS (ESI) [M + H]<sup>+</sup>:** Calculated mass for C<sub>52</sub>H<sub>53</sub>N<sub>4</sub>O<sub>4</sub>Si 825.3836, found 825.3834

#### Compound 4l

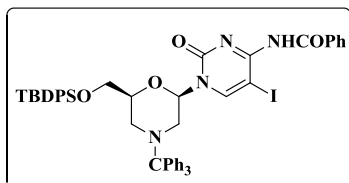

**<sup>1</sup>H-NMR (300 MHz, CDCl<sub>3</sub>):** δ 13.26 (s, 1H), 8.46 – 8.22 (m, 2H), 7.73 – 7.15 (m, 31H), 6.08 (dd, *J* = 9.3, 2.3 Hz, 1H), 4.28 (dt, *J* = 7.6, 2.2 Hz, 1H), 3.75 (dd, *J* = 10.7, 4.6 Hz, 1H), 3.71 – 3.60 (m, 1H), 3.45 (d, *J* = 11.2 Hz, 1H), 3.36 – 3.24 (m, 1H), 1.53 (d, *J* = 1.5 Hz, 1H), 1.37 – 1.25 (m, 1H), 0.99 (s, 9H).

**<sup>13</sup>C-NMR (75 MHz, CDCl<sub>3</sub>):** δ 156.7, 147.0, 145.4, 136.7, 135.6, 133.2, 133.1, 132.9, 130.4, 129.9, 129.3, 128.3, 128.0, 127.9, 127.8, 126.7, 81.7, 77.8, 77.5, 77.3, 77.1, 76.9, 76.7, 64.5, 52.7, 49.8, 26.9, 19.3.

**HRMS (ESI) [M + H]<sup>+</sup>:** Calculated mass for C<sub>51</sub>H<sub>50</sub>IN<sub>4</sub>O<sub>4</sub>Si 937.2646, found 937.2649

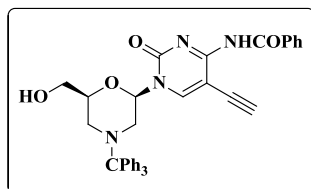

#### Compound 5a

**<sup>1</sup>H-NMR (300 MHz, CDCl<sub>3</sub>):** δ 8.25 (d, *J* = 7.6 Hz, 2H), 7.69 (s, 1H), 7.57 – 7.10 (m, 19H), 6.18 (dd, *J* = 9.4, 2.3 Hz, 1H), 4.30 (ddd, *J* = 6.3, 4.3, 2.2 Hz, 1H), 3.63 (dd, *J* = 5.1, 3.2 Hz, 2H), 3.49 (dt, *J* = 11.3, 2.4 Hz, 1H), 3.27 (s, 1H), 3.13 (d, *J* = 11.9 Hz, 1H), 1.91 (s, 1H), 1.50 (t, *J* = 11.3 Hz, 1H),

1.37 (dd,  $J = 11.4, 9.4$  Hz, 1H).

$^{13}\text{C}$  NMR (100 MHz,  $\text{CDCl}_3$ ):  $\delta$  158.6, 147.0, 144.6, 132.9, 129.9, 129.2, 128.4, 128.0, 128.0, 126.75, 82.9, 81.8, 78.2, 77.4, 77.3, 77.1, 76.9, 76.8, 74.7, 63.6, 52.6, 48.9.

HRMS (ESI)  $[\text{M} + \text{H}]^+$ : Calculated mass for  $\text{C}_{37}\text{H}_{33}\text{N}_4\text{O}_4$  597.2502, found 597.2501

#### Compound 5b

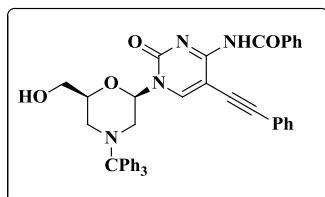

$^1\text{H}$ -NMR (300 MHz,  $\text{CDCl}_3$ ):  $\delta$  8.25 (d,  $J = 7.6$  Hz, 2H), 7.74 (s, 1H), 7.60 – 7.04 (m, 24H), 6.23 (dd,  $J = 9.4, 2.3$  Hz, 1H), 4.45 – 4.27 (m, 1H), 3.67 (dd,  $J = 5.0, 3.0$  Hz, 2H), 3.53 (d,  $J = 11.2$  Hz, 1H), 3.20 – 3.09 (m, 1H), 2.76 – 2.24 (m, 1H), 1.59 – 1.48 (m, 1H), 1.40 (dd,  $J = 11.3, 9.4$  Hz, 1H).

$^{13}\text{C}$ -NMR (75 MHz,  $\text{CDCl}_3$ ):  $\delta$  158.5, 143.1, 132.8, 131.5, 129.7, 129.2, 128.8, 128.5, 128.4, 128.0, 126.6, 122.5, 81.9, 80.3, 78.3, 77.5, 77.1, 76.9, 76.7, 63.7, 52.6, 48.9.

HRMS (ESI)  $[\text{M} + \text{Na}]^+$ : Calculated mass for  $\text{C}_{43}\text{H}_{36}\text{N}_4\text{NaO}_4$  695.2634, found 695.2635

#### Compound 5c

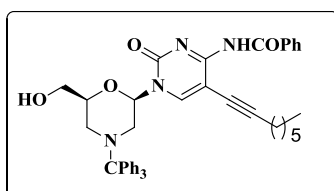

$^1\text{H}$ -NMR (300 MHz,  $\text{CDCl}_3$ ):  $\delta$  8.23 (d,  $J = 7.6$  Hz, 2H), 7.65 – 7.14 (m, 20H), 6.20 (dd,  $J = 9.4, 2.3$  Hz, 1H), 4.31 (ddt,  $J = 8.1, 3.9, 2.3$  Hz, 1H), 3.63 (t,  $J = 4.3$  Hz, 2H), 3.48 (d,  $J = 11.3$  Hz, 1H), 3.12 (d,  $J = 11.9$  Hz, 1H), 2.40 (t,  $J = 7.1$  Hz, 2H), 2.12 – 1.94 (m, 1H), 1.67 – 1.55 (m, 2H), 1.45 (q,  $J = 3.3, 2.4$  Hz, 2H), 1.35 – 1.22 (m, 5H), 0.97 – 0.82 (m, 3H).

$^{13}\text{C}$ -NMR (100 MHz,  $\text{CDCl}_3$ ):  $\delta$  159.1, 142.7, 132.8, 129.3, 128.3, 128.0, 126.7, 81.7, 78.1, 77.4, 77.3, 77.1, 77.0, 76.9, 76.8, 71.3, 63.7, 52.6, 48.9,

31.4, 28.7, 28.6, 22.6, 19.7, 14.1.

HRMS (ESI)  $[\text{M} + \text{Na}]^+$ : Calculated mass for  $\text{C}_{43}\text{H}_{44}\text{N}_4\text{NaO}_4$  703.3260, found 703.3262

#### Compound 5d

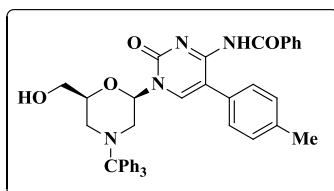

$^1\text{H}$ -NMR (300 MHz,  $\text{CDCl}_3$ ):  $\delta$  13.55 (s, 1H), 8.13 (d,  $J = 7.0$  Hz, 2H), 6.29 (dd,  $J = 9.6, 2.3$  Hz, 1H), 4.34 (dd,  $J = 7.2, 3.9$  Hz, 1H), 3.61 (t,  $J = 4.8$  Hz, 2H), 3.51 (d,  $J = 11.3$  Hz, 1H), 3.13 (d,  $J = 12.1$  Hz, 1H), 2.40 (s, 3H), 1.95 (s, 1H), 1.57 – 1.38 (m, 2H).

$^{13}\text{C}$ -NMR (100 MHz,  $\text{CDCl}_3$ ):  $\delta$  179.6, 158.4, 147.2, 138.2, 138.1, 137.0, 132.5, 130.1, 129.9, 129.5, 129.2, 128.9, 128.2, 128.0, 126.7, 116.4, 81.3, 78.0, 77.4, 77.3, 77.1, 76.9, 76.8, 63.7, 52.4, 48.9, 21.3.

HRMS (ESI)  $[\text{M} + \text{Na}]^+$ : Calculated mass for  $\text{C}_{42}\text{H}_{38}\text{N}_4\text{NaO}_4$  685.2791, found 685.2793

#### Compound 5e

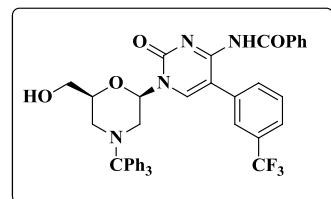

$^1\text{H}$ -NMR (300 MHz,  $\text{CDCl}_3$ ):  $\delta$  13.57 (s, 1H), 8.17 – 8.03 (m, 2H), 7.91 (s, 1H), 7.63 – 7.16 (m, 23H), 6.31 (dd,  $J = 9.5, 2.4$  Hz, 1H), 4.36 (ddt,  $J = 6.5, 4.4, 2.2$  Hz, 1H), 3.65 (t,  $J = 4.5$  Hz, 2H), 3.54 (d,  $J = 11.2$  Hz, 1H), 3.16 (d,  $J = 11.9$  Hz, 1H), 2.21 – 1.89 (m, 1H), 1.62 – 1.45 (m, 2H).

$^{13}\text{C}$ -NMR (100 MHz,  $\text{CDCl}_3$ ):  $\delta$  179.7, 157.7, 146.8, 138.7, 136.6, 133.5, 132.7, 132.4, 130.5, 130.2, 130.0, 129.2, 128.6, 128.1, 127.9, 127.1, 127.0, 126.6, 125.4, 124.7, 124.6, 122.7, 114.8, 81.3, 78.1, 77.3, 77.2, 77.0, 76.9,

76.7, 63.6, 52.4, 48.8.

HRMS (ESI)  $[\text{M} + \text{Na}]^+$ : Calculated mass for  $\text{C}_{42}\text{H}_{35}\text{F}_3\text{N}_4\text{NaO}_4$  739.2508, found 739.2506

#### Compound 5f



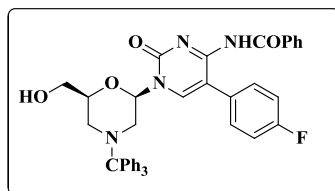

**<sup>1</sup>H-NMR (300 MHz, CDCl<sub>3</sub>):**  $\delta$  13.52 (s, 1H), 8.10 (d,  $J$  = 7.0 Hz, 2H), 7.59 – 7.16 (m, 21H), 7.08 (t,  $J$  = 8.6 Hz, 2H), 6.28 (dd,  $J$  = 9.5, 2.3 Hz, 1H), 4.39 – 4.27 (m, 1H), 3.63 (t,  $J$  = 4.7 Hz, 2H), 3.52 (d,  $J$  = 11.3 Hz, 1H), 3.14 (d,  $J$  = 12.0 Hz, 1H), 1.88 (s, 1H), 1.56 – 1.37 (m, 2H).

**<sup>13</sup>C-NMR (100 MHz, CDCl<sub>3</sub>):**  $\delta$  179.8, 163.9, 161.5, 158.29, 147.0, 138.2, 137.0, 132.7, 131.5, 131.4, 130.1, 129.3, 128.9, 128.8, 128.2, 128.1, 126.7, 115.6, 115.3, 115.0, 81.4, 78.1, 77.4, 77.3, 77.1, 77.0, 76.8, 63.8, 52.5, 49.0.

**HRMS (ESI) [M + Na]<sup>+</sup>:** Calculated mass for C<sub>41</sub>H<sub>35</sub>FN<sub>4</sub>NaO<sub>4</sub> 689.2540, found 689.2542

#### Compound 5g

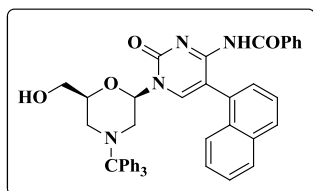

**<sup>1</sup>H NMR (300 MHz, CDCl<sub>3</sub>):**  $\delta$  13.45 (s, 1H), 7.91 (d,  $J$  = 8.2 Hz, 2H), 7.72 – 7.15 (m, 25H), 6.34 (td,  $J$  = 9.5, 2.4 Hz, 1H), 4.32 (t,  $J$  = 7.5 Hz, 1H), 3.65 – 3.45 (m, 3H), 3.16 – 3.03 (m, 1H), 1.78 (s, 1H), 1.55 – 1.34 (m, 2H).

**<sup>13</sup>C-NMR (100 MHz, CDCl<sub>3</sub>):**  $\delta$  158.7, 147.7, 139.9, 136.7, 133.7, 132.5, 132.4, 129.9, 129.3, 128.8, 128.5, 128.4, 128.0, 128.0, 126.7, 126.3, 126.2, 126.1, 126.0, 125.3, 125.2, 115.1, 81.5, 81.3, 78.0, 77.4, 77.3, 77.1, 77.0,

76.8, 63.7, 52.5, 48.9.

**HRMS (ESI) [M + Na]<sup>+</sup>:** Calculated mass for C<sub>45</sub>H<sub>38</sub>N<sub>4</sub>NaO<sub>4</sub> 721.2791, found 721.2794

#### Compound 5h

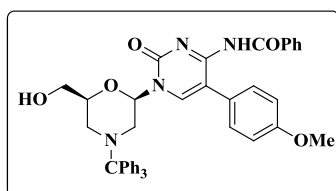

**<sup>1</sup>H-NMR (300 MHz, CDCl<sub>3</sub>):**  $\delta$  8.18 – 8.08 (m, 2H), 7.60 – 7.17 (m, 23H), 6.92 (dd,  $J$  = 8.7, 1.7 Hz, 2H), 6.29 (dd,  $J$  = 9.5, 2.3 Hz, 1H), 4.39 – 4.25 (m, 1H), 3.83 (s, 3H), 3.62 (t,  $J$  = 5.0 Hz, 2H), 3.50 (d,  $J$  = 11.3 Hz, 1H), 3.13 (d,  $J$  = 12.0 Hz, 1H), 2.05 (s, 1H), 1.58 – 1.42 (m, 2H).

**<sup>13</sup>C-NMR (100 MHz, CDCl<sub>3</sub>):**  $\delta$  179.6, 159.6, 158.5, 147.2, 137.8, 137.1, 132.5, 130.8, 130.1, 129.3, 128.2, 128.0, 126.7, 125.2, 116.1, 113.6, 81.3,

78.0, 77.4, 77.3, 77.1, 77.0, 76.8, 63.8, 55.4, 52.4, 49.0.

**HRMS (ESI) [M + H]<sup>+</sup>:** Calculated mass for C<sub>42</sub>H<sub>39</sub>N<sub>4</sub>O<sub>5</sub> 679.2920, found 679.2913

#### Compound 5i

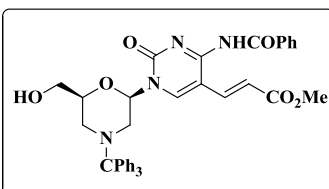

**<sup>1</sup>H-NMR (300 MHz, CDCl<sub>3</sub>):**  $\delta$  13.44 (s, 1H), 8.24 (d,  $J$  = 7.0 Hz, 2H), 7.63 (s, 1H), 7.59 – 7.18 (m, 20H), 6.91 (d,  $J$  = 15.9 Hz, 1H), 6.19 (dd,  $J$  = 9.5, 2.3 Hz, 1H), 4.31 (td,  $J$  = 7.5, 6.5, 3.4 Hz, 1H), 3.76 (s, 3H), 3.71 – 3.62 (m, 2H), 3.48 (dt,  $J$  = 11.3, 2.4 Hz, 1H), 3.17 – 3.05 (m, 1H), 2.11 (s, 1H), 1.52 (dd,  $J$  = 12.0, 10.6 Hz, 1H), 1.39 (dd,  $J$  = 11.3, 9.5 Hz, 1H).

**<sup>13</sup>C-NMR (100 MHz, CDCl<sub>3</sub>):**  $\delta$  180.1, 167.6, 157.1, 146.3, 141.4, 136.6, 136.2, 132.9, 130.1, 129.2, 129.2, 128.4, 128.1, 128.0, 126.83, 119.9, 110.2, 81.6, 78.3, 77.4, 77.3, 77.1, 77.0, 76.8, 63.7, 52.7, 51.8, 48.9.

**HRMS (ESI) [M + Na]<sup>+</sup>:** Calculated mass for C<sub>39</sub>H<sub>36</sub>N<sub>4</sub>NaO<sub>6</sub> 679.2533, found 679.2535

#### Compound 5j

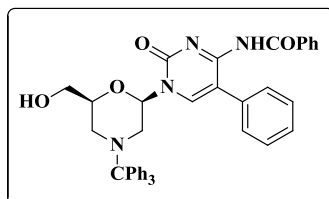

**<sup>1</sup>H-NMR (300 MHz, CDCl<sub>3</sub>):**  $\delta$  13.56 (s, 1H), 8.13 (d,  $J$  = 7.3 Hz, 2H), 7.61 – 7.17 (m, 26H), 6.31 (dd,  $J$  = 9.5, 2.3 Hz, 1H), 4.43 – 4.31 (m, 1H), 3.63 (t,  $J$  = 4.4 Hz, 2H), 3.58 – 3.49 (m, 1H), 3.16 (d,  $J$  = 11.8 Hz, 1H), 2.30 (s, 1H), 1.61 – 1.45 (m, 2H).

**<sup>13</sup>C NMR (75 MHz, CDCl<sub>3</sub>):**  $\delta$  158.2, 147.1, 138.5, 136.9, 132.8, 132.5, 130.0, 129.6, 129.2, 128.1, 128.1, 128.0, 128.0, 126.6, 116.3, 81.3, 78.0,

77.5, 77.3, 77.1, 76.9, 76.7, 63.6, 52.4, 48.9.

**HRMS (ESI) [M + H]<sup>+</sup>**: Calculated mass for C<sub>41</sub>H<sub>37</sub>N<sub>4</sub>O<sub>4</sub> 649.2815, found 649.2816

### Compound 5k

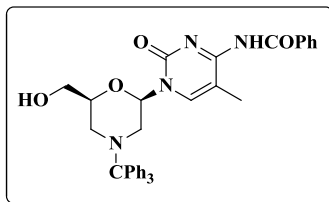

**<sup>1</sup>H-NMR (300 MHz, CDCl<sub>3</sub>)**: δ 8.28 (d, *J* = 7.0 Hz, 2H), 7.58 – 7.16 (m, 19H), 6.22 (dd, *J* = 9.6, 2.4 Hz, 1H), 4.38 – 4.22 (m, 1H), 3.64 (qd, *J* = 11.9, 5.0 Hz, 2H), 3.41 (d, *J* = 11.2 Hz, 1H), 3.12 (d, *J* = 11.9 Hz, 1H), 2.00 (d, *J* = 1.1 Hz, 3H), 1.47 (ddd, *J* = 18.1, 11.6, 10.1 Hz, 2H).

**<sup>13</sup>C NMR (75 MHz, CDCl<sub>3</sub>)**: δ 159.6, 147.5, 137.1, 136.7, 132.6, 130.0, 129.3, 128.2, 128.0, 126.7, 111.7, 81.0, 77.9, 77.5, 77.3, 77.1, 76.9, 76.7, 63.8, 52.2, 48.9, 13.6.

**HRMS (ESI) [M + H]<sup>+</sup>**: Calculated mass for C<sub>36</sub>H<sub>35</sub>N<sub>4</sub>O<sub>4</sub> 587.2658, found 587.2659

### Compound 5l

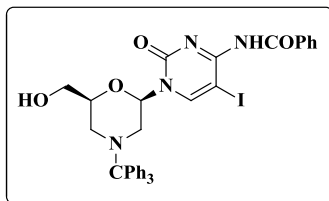

**<sup>1</sup>H-NMR (300 MHz, CDCl<sub>3</sub>)**: δ 13.22 (s, 1H), 8.41 – 8.30 (m, 2H), 7.73 (s, 1H), 7.58 – 7.17 (m, 20H), 6.16 (d, *J* = 7.1 Hz, 1H), 4.37 – 4.22 (m, 1H), 3.64 (dd, *J* = 5.0, 2.6 Hz, 2H), 3.46 (d, *J* = 11.2 Hz, 1H), 3.13 (d, *J* = 11.9 Hz, 1H), 1.45 (ddd, *J* = 29.5, 11.7, 10.1 Hz, 2H).

**<sup>13</sup>C NMR (75 MHz, CDCl<sub>3</sub>)**: δ 156.6, 147.0, 145.3, 136.6, 133.0, 130.4, 129.2, 128.3, 128.1, 128.0, 126.7, 81.6, 78.2, 77.5, 77.3, 77.1, 76.9, 76.7, 63.7, 52.5, 48.9.

**HRMS (ESI) [M + H]<sup>+</sup>**: Calculated mass for C<sub>35</sub>H<sub>32</sub>I<sub>N</sub><sub>4</sub>O<sub>4</sub> 699.1468, found 699.1466

### Compound 9a

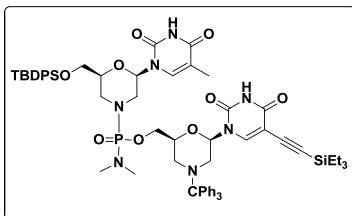

**<sup>1</sup>H-NMR (300 MHz, CDCl<sub>3</sub>)**: δ 9.39 (dd, *J* = 40.8, 27.8 Hz, 2H), 7.69 – 7.10 (m, 28H), 6.13 (ddd, *J* = 22.5, 9.5, 2.3 Hz, 1H), 5.61 (ddd, *J* = 23.9, 9.9, 2.7 Hz, 1H), 4.43 (s, 1H), 4.04 – 3.66 (m, 6H), 3.49 – 3.26 (m, 3H), 3.16 (dd, *J* = 12.8, 3.6 Hz, 1H), 2.63 (dd, *J* = 12.0, 9.7 Hz, 6H), 2.12 – 1.96 (m, 1H), 1.89 (d, *J* = 1.2 Hz, 3H), 1.55 – 1.32 (m, 2H), 1.06 (d, *J* = 3.5 Hz, 9H), 0.97 (td, *J* = 7.8, 3.2 Hz, 9H), 0.66 – 0.57 (m, 6H).

**<sup>13</sup>C-NMR (125 MHz, CDCl<sub>3</sub>)**: δ 163.8, 163.7, 161.0, 149.8, 149.8, 149.0, 148.9, 147.0, 142.8, 142.7, 135.6, 135.5, 135.1, 133.0, 133.0, 132.9, 130.0, 130.0, 129.2, 129.2, 128.8, 128.0, 128.0, 127.9, 127.3, 126.7, 126.6, 111.0, 110.9, 100.3, 100.2, 97.3, 96.5, 82.1, 81.2, 81.0, 79.8, 79.8, 77.8, 77.4, 77.1, 76.9, 75.8, 75.7, 75.5, 75.5, 65.6, 65.4, 65.4, 64.2, 64.2, 52.2, 52.1, 49.2, 48.9, 47.5, 47.3, 45.3, 45.2, 36.8, 36.7, 26.8, 19.4, 19.3, 12.6, 7.5, 4.3

**<sup>31</sup>P-NMR (121 MHz, CDCl<sub>3</sub>)**: δ 16.29, 16.51.

**HRMS (ESI) [M + Na]<sup>+</sup>**: Calculated mass for C<sub>64</sub>H<sub>78</sub>N<sub>7</sub>NaO<sub>9</sub>PSi<sub>2</sub> 1198.5035, found 1198.5037

**Yield**: 61%

### Compound 9b

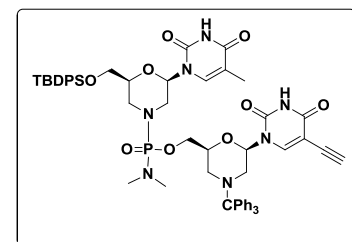

**<sup>1</sup>H-NMR (300 MHz, CDCl<sub>3</sub>)**: δ 9.18 – 8.91 (m, 2H), 7.76 – 7.04 (m, 28H), 6.20 – 6.05 (m, 1H), 5.66 – 5.51 (m, 1H), 4.49 – 4.32 (m, 1H), 4.01 – 3.63 (m, 5H), 3.49 – 3.25 (m, 3H), 3.12 (dd, *J* = 12.1, 9.6 Hz, 1H), 3.03 (s, 1H), 2.63 (dd, *J* = 18.8, 9.8 Hz, 7H), 1.87 (dd, *J* = 5.4, 1.1 Hz, 3H), 1.43 (dt, *J* = 27.5, 10.6 Hz, 2H), 1.06 (d, *J* = 3.1 Hz, 9H).

**<sup>13</sup>C-NMR (125MHz, CDCl<sub>3</sub>):** δ 163.6, 161.1, 155.8, 151.5, 149.8, 149.7, 148.8, 148.7, 147.0, 143.7, 135.6, 135.1, 133.0, 130.1, 129.2, 128.0, 127.9, 127.3, 126.7, 111.1, 98.8, 82.0, 81.2, 79.8, 77.4, 77.1, 76.9, 64.2, 52.2, 49.1, 47.4, 45.3, 36.8, 36.7, 26.9, 19.4, 12.6

**<sup>31</sup>P-NMR (121 MHz, CDCl<sub>3</sub>):** δ 16.32, 16.52.

**HRMS (ESI) [M + Na]<sup>+</sup>:** Calculated mass for C<sub>58</sub>H<sub>64</sub>N<sub>7</sub>NaO<sub>9</sub>PSi 1084.4170, found 1084.4171

**Yield:** 53%

#### Compound 9c

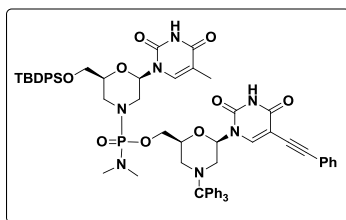

**<sup>1</sup>H-NMR (300 MHz, CDCl<sub>3</sub>):** δ 9.15 (d, *J* = 42.7 Hz, 1H), 7.75 – 7.08 (m, 32H), 6.27 – 6.06 (m, 1H), 5.69 – 5.49 (m, 1H), 4.47 (d, *J* = 11.4 Hz, 1H), 4.06 – 3.63 (m, 5H), 3.45 (d, *J* = 10.7 Hz, 2H), 3.16 (d, *J* = 11.6 Hz, 1H), 2.93 – 2.74 (m, 1H), 2.69 – 2.49 (m, 6H), 1.84 (d, *J* = 1.2 Hz, 3H), 1.76 (s, 2H), 1.46 (dt, *J* = 25.4, 10.4 Hz, 2H), 1.06 (s, 9H).

**<sup>13</sup>C-NMR (75 MHz, CDCl<sub>3</sub>):** δ 163.7, 161.0, 149.8, 148.9, 142.2, 135.6, 135.0, 133.1, 131.7, 130.0, 129.9, 129.6, 129.2, 128.9, 128.7, 128.4, 128.1, 127.9, 126.7, 122.5, 111.1, 111.0, 100.2, 93.7, 81.1, 80.3, 79.9, 79.8, 77.5, 77.3, 77.1, 77.0, 76.7, 65.6, 64.3, 52.4, 49.0, 47.5, 45.3, 36.8, 36.8, 26.9, 19.4, 12.6

**<sup>31</sup>P-NMR (121 MHz, CDCl<sub>3</sub>):** δ 16.53, 16.29.

**HRMS (ESI) [M + Na]<sup>+</sup>:** Calculated mass for C<sub>64</sub>H<sub>68</sub>N<sub>7</sub>NaO<sub>9</sub>PSi 1160.4483, found 1160.4487

**Yield:** 57%

#### Compound 9e

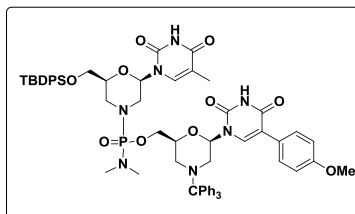

**<sup>1</sup>H-NMR (300 MHz, CDCl<sub>3</sub>):** δ 8.72 (d, *J* = 8.3 Hz, 1H), 7.67 – 7.09 (m, 31H), 6.83 (dd, *J* = 8.9, 2.8 Hz, 2H), 6.28 – 6.15 (m, 1H), 5.63 – 5.49 (m, 1H), 4.50 – 4.32 (m, 1H), 3.92 (dd, *J* = 10.5, 6.1 Hz, 2H), 3.75 (s, 3H), 3.69 (s, 1H), 3.47 – 3.25 (m, 3H), 3.15 (d, *J* = 11.4 Hz, 1H), 2.65 – 2.52 (m, 6H), 1.86 (d, *J* = 1.2 Hz, 3H), 1.55 – 1.41 (m, 2H), 1.05 (d, *J* = 4.4 Hz, 8H).

**<sup>13</sup>C-NMR (100 MHz, CDCl<sub>3</sub>):** δ 163.4, 161.9, 159.5, 149.6, 149.4, 136.1, 136.1, 135.6, 135.0, 133.0, 130.0, 129.5, 129.4, 129.3, 128.0, 127.9, 126.7, 126.6, 124.6, 124.5, 115.0, 114.0, 111.0, 80.9, 79.8, 79.7, 77.4, 77.3, 77.1, 77.0, 76.8, 75.5, 75.5, 65.5, 65.4, 64.2, 55.4, 52.1, 49.3, 47.4, 45.3, 36.8, 36.8, 26.9, 19.4, 12.5

**<sup>31</sup>P-NMR (121 MHz, CDCl<sub>3</sub>):** δ 16.42, 16.51

**HRMS (ESI) [M + Na]<sup>+</sup>:** Calculated mass for C<sub>63</sub>H<sub>70</sub>N<sub>7</sub>NaO<sub>10</sub>PSi 1166.4589, found 1166.4587

**Yield:** 63%

#### Compound 9h

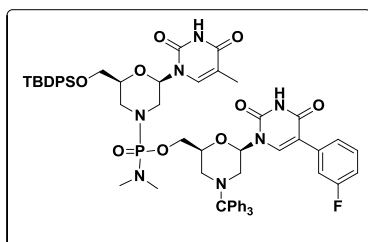

**<sup>1</sup>H-NMR (300 MHz, CDCl<sub>3</sub>):** δ 9.00 (s, 1H), 8.89 (s, 1H), 7.68 – 7.10 (m, 31H), 6.98 – 6.86 (m, 1H), 6.26 – 6.12 (m, 1H), 5.51 (dd, *J* = 9.9, 2.7 Hz, 1H), 4.42 (s, 1H), 4.01 – 3.87 (m, 2H), 3.84 – 3.59 (m, 4H), 3.52 – 3.21 (m, 4H), 3.16 (d, *J* = 11.6 Hz, 1H), 2.72 – 2.59 (m, 6H), 1.86 (s, 3H), 1.75 (s, 3H), 1.50 (q, *J* = 11.6, 11.1 Hz, 2H), 1.05 (s, 9H).

**<sup>13</sup>C-NMR (100 MHz, CDCl<sub>3</sub>):** δ 163.5, 161.5, 149.6, 149.3, 147.0, 137.7, 135.6, 135.0, 133.0, 133.0, 130.1, 129.9, 129.9, 129.3, 129.2,

128.0, 127.9, 127.3, 126.6, 123.8, 123.8, 115.3, 115.1, 114.9, 111.0, 81.1, 79.8, 77.4, 77.1, 76.8, 75.6, 75.5, 65.4, 65.3, 64.2, 52.1, 49.1, 47.4, 45.3, 36.8, 36.8, 26.9, 19.4, 12.5

$^{31}\text{P}$ -NMR (162 MHz,  $\text{CDCl}_3$ ):  $\delta$  16.42, 16.26.

HRMS (ESI)  $[\text{M} + \text{Na}]^+$ : Calculated mass for  $\text{C}_{62}\text{H}_{67}\text{FN}_7\text{NaO}_9\text{PSi}$  1154.4389, found 1154.4385

Yield: 64%

#### Compound 10b

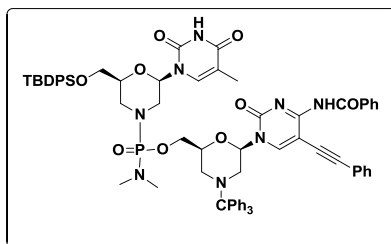

$^1\text{H}$  NMR (300 MHz,  $\text{CDCl}_3$ ):  $\delta$  8.36 (s, 1H), 8.29 (d,  $J = 7.2$  Hz, 2H), 7.76 (s, 1H), 7.63 (dd,  $J = 7.7, 1.8$  Hz, 4H), 7.56 – 7.24 (m, 27H), 7.20 – 7.13 (m, 3H), 6.27 – 6.14 (m, 1H), 5.58 (td,  $J = 11.8, 10.9, 2.8$  Hz, 1H), 4.44 (s, 1H), 4.06 – 3.89 (m, 2H), 3.88 – 3.64 (m, 4H), 3.58 – 3.33 (m, 3H), 3.17 (d,  $J = 11.7$  Hz, 1H), 2.89 – 2.75 (m, 1H), 2.64 (t,  $J = 10.1$  Hz, 6H), 1.82 (dd,  $J = 6.3, 1.2$  Hz, 3H), 1.42 (q,  $J = 11.4, 10.4$  Hz, 2H), 1.04 (d,  $J = 6.0$  Hz, 9H).

$^{13}\text{C}$  NMR (100 MHz,  $\text{CDCl}_3$ ):  $\delta$  163.2, 149.6, 135.6, 135.6, 135.6, 135.0, 133.1, 132.9, 131.6, 130.0, 129.9, 129.2, 128.9, 128.6, 128.5, 128.4, 128.1, 128.0, 127.9, 127.4, 126.8, 122.6, 110.9, 81.7, 79.8, 77.8, 77.4, 77.3, 77.1, 77.0, 77.0, 76.8, 75.8, 64.3, 52.5, 49.1, 47.5, 45.3, 36.9, 36.8, 36.8, 26.9, 19.4, 12.5.

$^{31}\text{P}$  NMR (162 MHz,  $\text{CDCl}_3$ ):  $\delta$  16.41, 16.19.

HRMS (ESI)  $[\text{M} + \text{H}]^+$ : Calculated mass for  $\text{C}_{71}\text{H}_{74}\text{N}_8\text{O}_9\text{PSi}$  1241.5086 found 1241.5083

Yield: 63%

#### Compound 10d

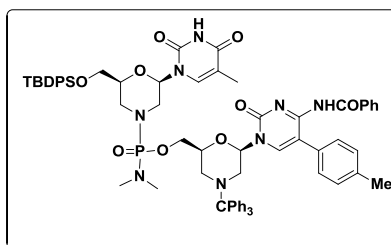

$^1\text{H}$  NMR (300 MHz,  $\text{CDCl}_3$ ):  $\delta$  13.58 (s, 1H), 8.66 (d,  $J = 35.1$  Hz, 1H), 8.21 – 8.06 (m, 2H), 7.63 (ddd,  $J = 7.9, 4.9, 1.7$  Hz, 4H), 7.55 – 7.24 (m, 25H), 7.24 – 7.09 (m, 6H), 6.26 (ddd,  $J = 9.6, 7.3, 2.3$  Hz, 1H), 5.55 (ddd,  $J = 19.4, 9.9, 2.7$  Hz, 1H), 4.41 (d,  $J = 11.6$  Hz, 1H), 3.93 (t,  $J = 6.5$  Hz, 2H), 3.85 – 3.62 (m, 3H), 3.48 (d,  $J = 10.0$  Hz, 1H), 3.37 (dd,  $J = 10.5, 6.0$  Hz, 2H), 3.17 (d,  $J = 11.8$  Hz, 1H), 2.86 – 2.70 (m, 1H), 2.62 (dd,  $J = 9.7, 8.4$  Hz, 6H), 2.37 (d,  $J = 6.1$  Hz, 3H), 1.86 (dd,  $J = 2.9, 1.1$  Hz, 3H), 1.57 – 1.41 (m, 2H), 1.06 (d,  $J = 5.7$

Hz, 9H).

$^{13}\text{C}$  NMR (101 MHz,  $\text{CDCl}_3$ ):  $\delta$  163.4, 163.2, 149.6, 149.5, 138.0, 138.0, 135.6, 135.6, 135.5, 135.0, 133.1, 133.0, 132.5, 130.1, 130.0, 129.4, 129.2, 128.9, 128.9, 128.2, 128.0, 128.0, 127.9, 127.9, 127.9, 127.3, 126.7, 126.7, 110.9, 110.9, 81.3, 79.9, 79.7, 79.7, 77.8, 77.7, 77.4, 77.3, 77.1, 77.0, 77.0, 76.8, 75.8, 75.7, 75.6, 75.5, 64.2, 52.3, 52.1, 49.3, 49.2, 47.3, 45.3, 36.8, 36.8, 36.7, 26.9, 26.8, 21.3, 19.4, 19.3, 12.5.

$^{31}\text{P}$  NMR (162 MHz,  $\text{CDCl}_3$ ):  $\delta$  16.39, 16.26.

HRMS (ESI)  $[\text{M} + \text{Na}]^+$ : Calculated mass for  $\text{C}_{70}\text{H}_{76}\text{N}_8\text{O}_9\text{PSi}$  1231.5242, found=1231.5243

Yield: 70%

#### Compound 10f

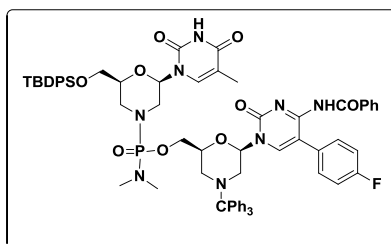

$^1\text{H}$  NMR (300 MHz,  $\text{CDCl}_3$ ):  $\delta$  13.57 (s, 1H), 8.52 (d,  $J = 29.0$  Hz, 1H), 8.11 (ddd,  $J = 8.6, 2.7, 1.4$  Hz, 2H), 7.70 – 7.57 (m, 4H), 7.54 – 7.23 (m, 24H), 7.19 – 6.99 (m, 6H), 6.25 (ddd,  $J = 9.1, 6.3, 2.3$  Hz, 1H), 5.54 (ddd,  $J = 15.0, 9.9, 2.8$  Hz, 1H), 4.41 (d,  $J = 9.3$  Hz, 1H), 4.03 – 3.86 (m, 2H), 3.85 – 3.62 (m, 3H), 3.53 (d,  $J = 9.6$  Hz, 1H), 3.44 – 3.26 (m, 2H), 3.18 (d,  $J = 11.9$  Hz, 1H), 2.86 – 2.69 (m, 1H),

2.61 (dd,  $J = 9.7, 4.5$  Hz, 6H), 2.55 – 2.46 (m, 1H), 1.86 (d,  $J = 1.1$  Hz, 3H), 1.57 – 1.42 (m, 2H), 1.06 (d,  $J = 6.0$  Hz, 9H).

$^{13}\text{C}$  NMR (100 MHz,  $\text{CDCl}_3$ ):  $\delta$  163.9, 163.4, 163.2, 161.4, 158.3, 149.66, 149.5, 147.1, 138.5, 138.4, 135.6, 135.0, 133.1, 133.0, 132.7, 131.4, 131.4, 130.1, 130.0, 129.2, 128.8, 128.2, 128.0, 127.9, 127.9, 127.8, 126.7, 115.4, 115.2, 115.0, 111.0, 110.9, 81.4, 79.9, 79.8, 79.7, 77.8, 77.4, 77.3, 77.1, 77.0, 76.8, 75.8, 75.7, 75.6, 75.5, 65.3, 64.2, 64.2, 52.3, 52.2, 50.9, 49.3, 49.2, 47.4, 47.4, 45.3, 36.8, 36.7, 26.9, 19.4, 19.3, 12.5.

$^{31}\text{P}$  NMR (162 MHz,  $\text{CDCl}_3$ ):  $\delta$  16.45, 16.28.

HRMS (ESI)  $[\text{M} + \text{H}]^+$ : Calculated mass for  $\text{C}_{69}\text{H}_{73}\text{FN}_8\text{O}_9\text{PSi}$  1235.4991, found 1235.4984

Yield: 75%

### Compound 10h

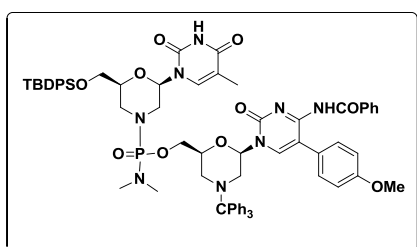

$^1\text{H}$  NMR (300 MHz,  $\text{CDCl}_3$ ):  $\delta$  13.54 (s, 1H), 8.26 (d,  $J = 21.8$  Hz, 1H), 8.19 – 8.09 (m, 2H), 7.67 (s, 5H), 7.53 – 7.23 (m, 26H), 7.22 – 7.09 (m, 4H), 6.92 (d,  $J = 8.4$  Hz, 2H), 6.25 (t,  $J = 8.1$  Hz, 1H), 5.61 – 5.45 (m, 1H), 4.41 (s, 1H), 3.99 – 3.87 (m, 2H), 3.82 (d,  $J = 6.5$  Hz, 3H), 3.80 – 3.66 (m, 3H), 3.49 (t,  $J = 10.0$  Hz, 1H), 3.36 (t,  $J = 9.7$  Hz, 2H), 3.15 (s, 1H), 2.76 (dd,  $J = 17.5, 5.8$  Hz, 1H), 2.61 (dd,  $J = 9.7, 7.7$  Hz, 6H), 1.86 (dd,  $J = 3.3, 1.1$  Hz, 3H), 1.48 (td,  $J = 11.5, 9.0$  Hz, 2H), 1.05 (d,  $J = 5.9$  Hz, 9H).

$^{13}\text{C}$  NMR (101 MHz,  $\text{CDCl}_3$ ):  $\delta$  163.1, 159.6, 159.6, 158.5, 149.5, 147.0, 137.9, 135.6, 135.1, 133.1, 133.0, 132.6, 130.8, 130.1, 130.0, 129.3, 128.2, 128.0, 128.0, 127.9, 127.3, 126.7, 125.2, 113.7, 113.6, 110.9, 110.9, 81.3, 77.8, 77.4, 77.3, 77.1, 77.0, 76.8, 65.5, 65.3, 64.2, 55.4, 55.4, 52.3, 52.1, 49.3, 47.4, 45.3, 36.8, 36.8, 26.9, 19.4, 19.4, 12.5.

$^{31}\text{P}$  NMR (121 MHz,  $\text{CDCl}_3$ ):  $\delta$  16.52, 16.37.

HRMS (ESI)  $[\text{M} + \text{H}]^+$ : Calculated mass for  $\text{C}_{70}\text{H}_{76}\text{N}_8\text{O}_{10}\text{PSi}$  1247.5191 found 1247.5187

Yield: 72%

### 3. NMR spectra

<sup>1</sup>H-NMR of compound **1a**, CDCl<sub>3</sub>, 300 MHz

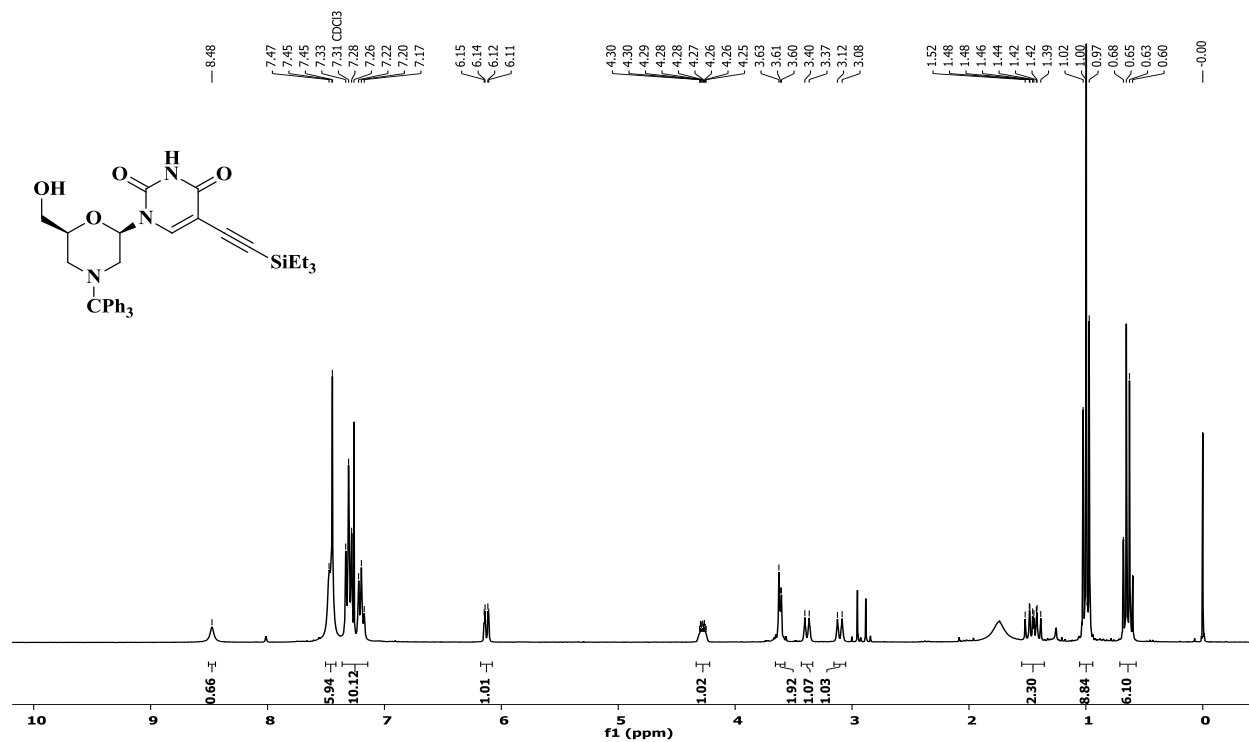

<sup>13</sup>C-NMR of compound **1a**, CDCl<sub>3</sub>, 75 MHz

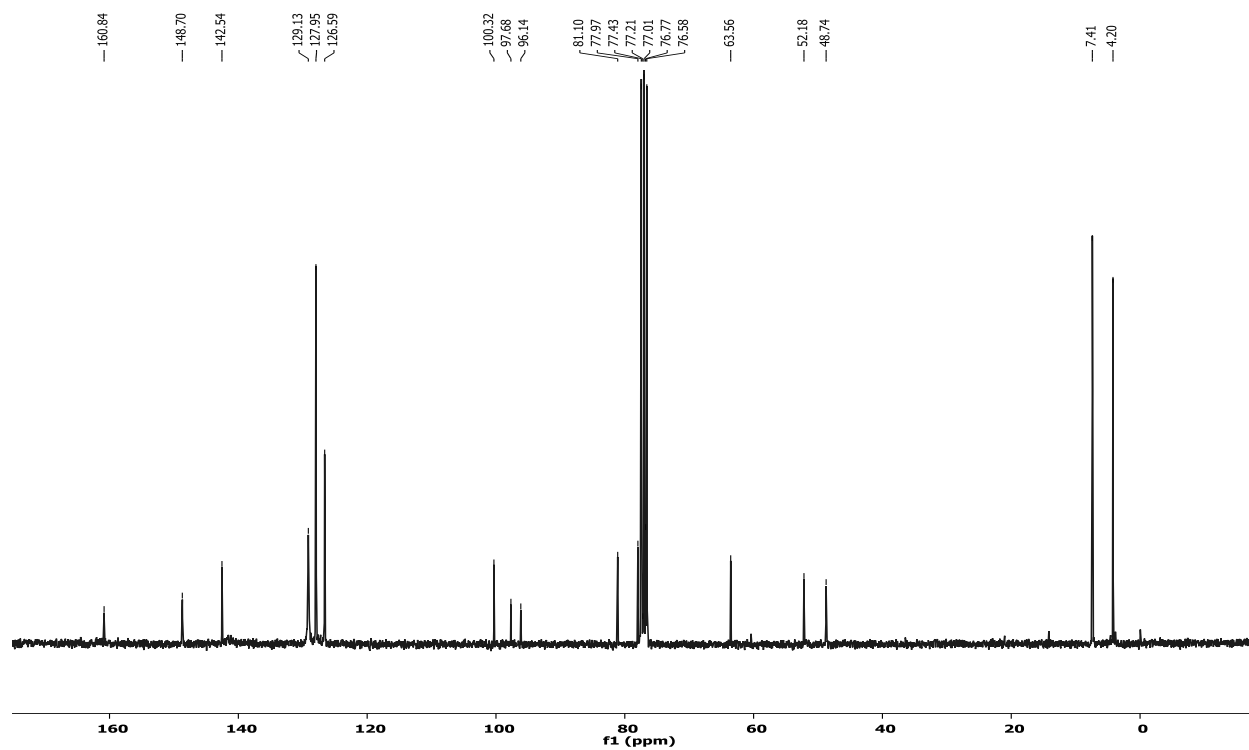

1H-NMR of compound **1b**, CDCl<sub>3</sub>, 300 MHz

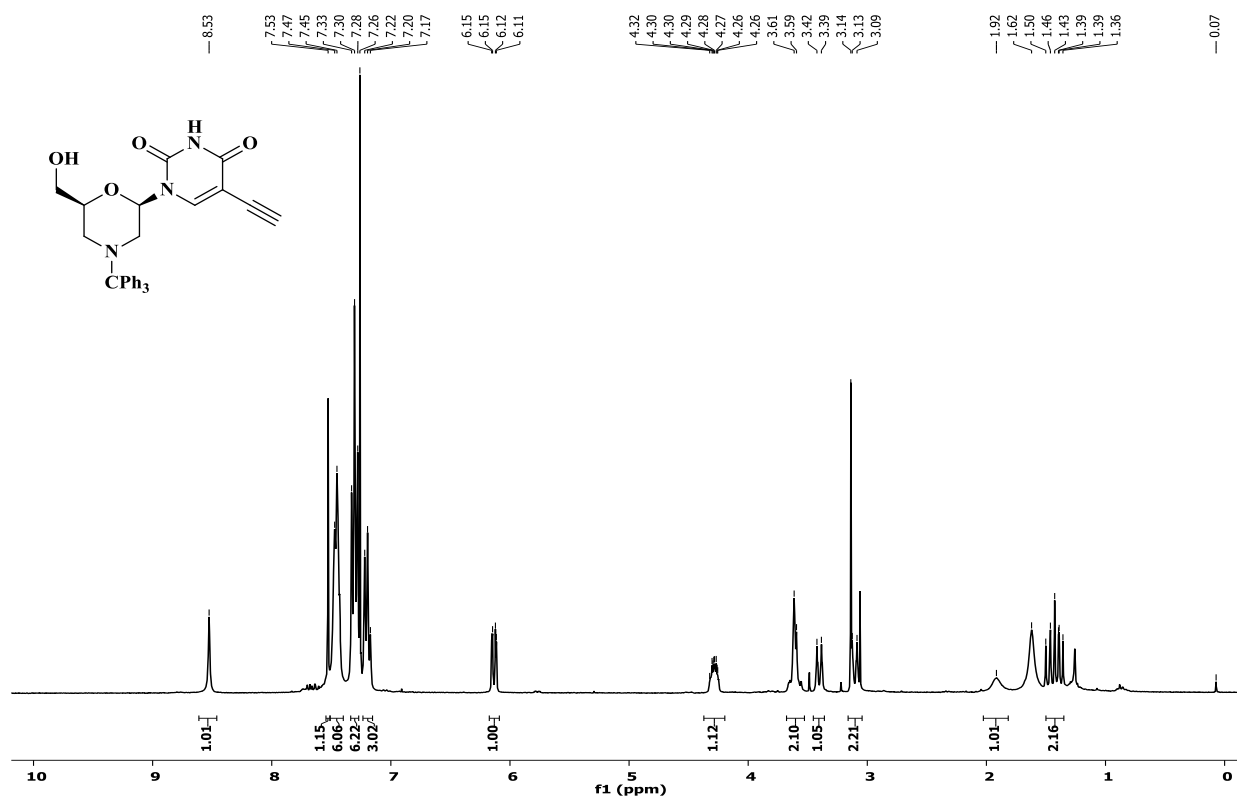

13C-NMR of compound **1b**, CDCl<sub>3</sub>, 100 MHz

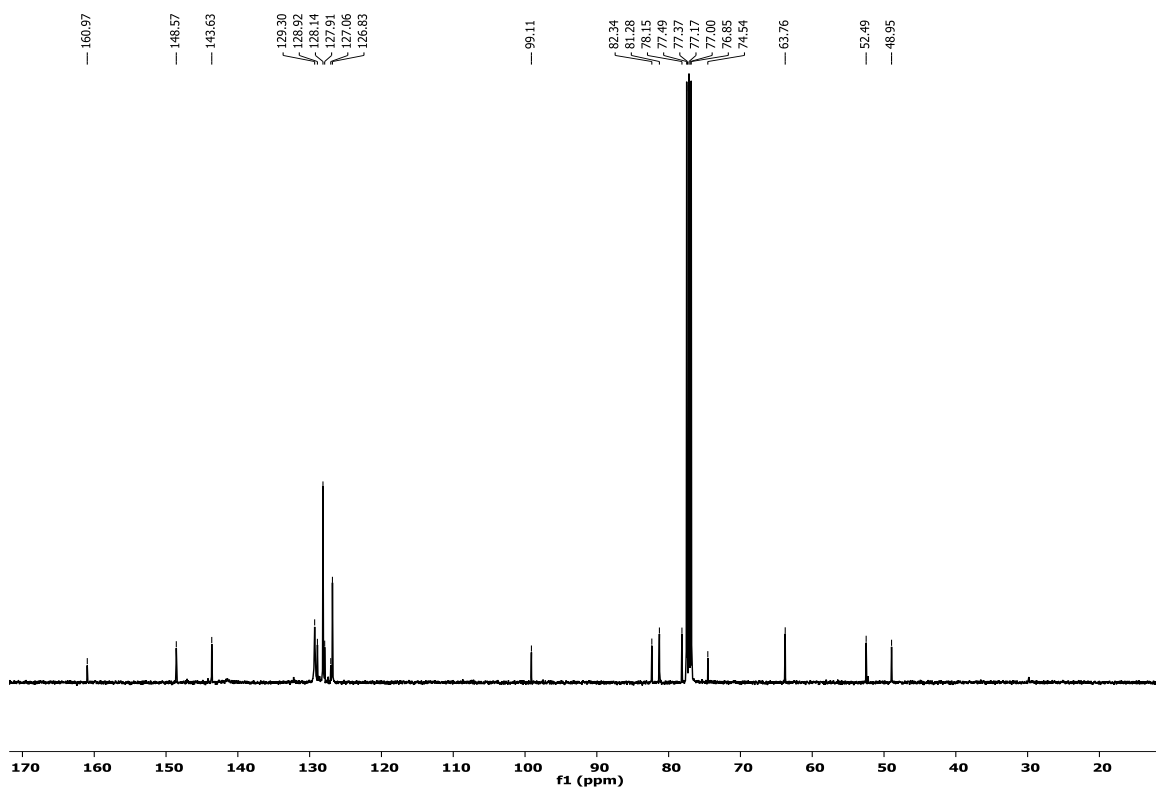

<sup>1</sup>H-NMR of compound **1d**, CDCl<sub>3</sub>, 300 MHz

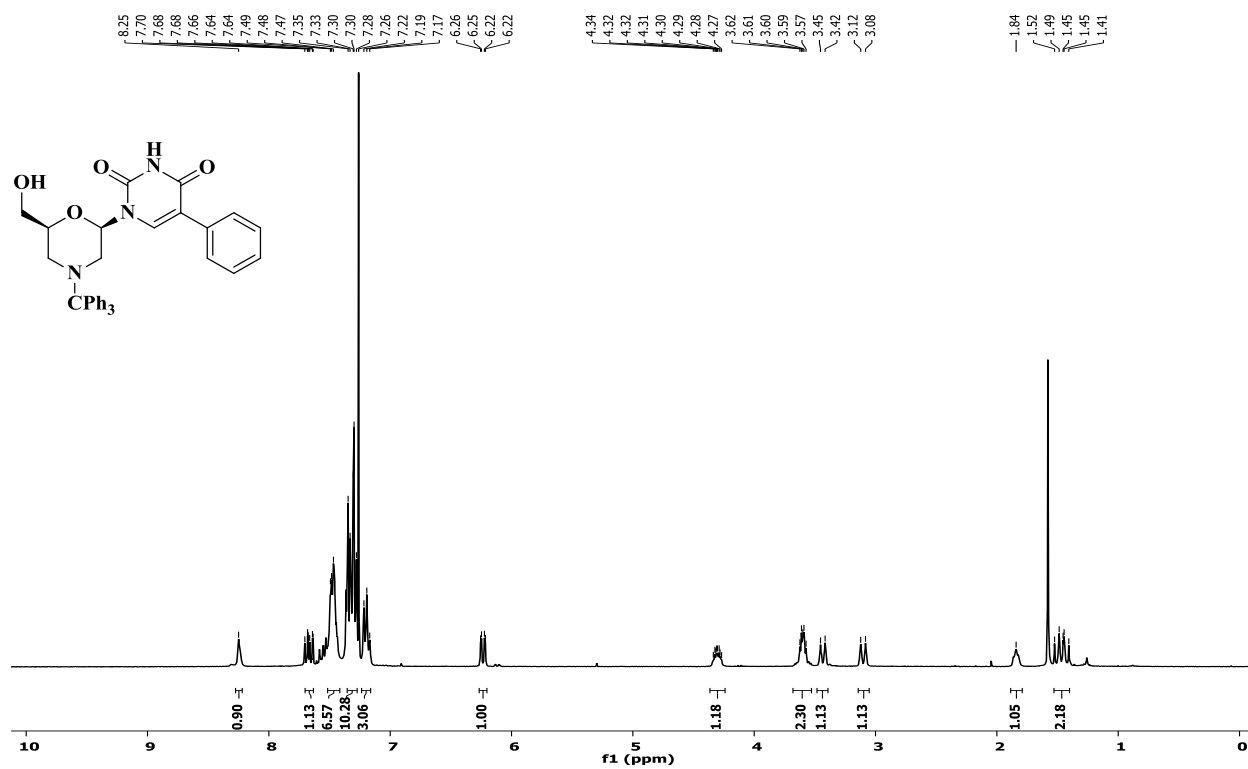

<sup>13</sup>C-NMR of compound **1d**, CDCl<sub>3</sub>, 100 MHz

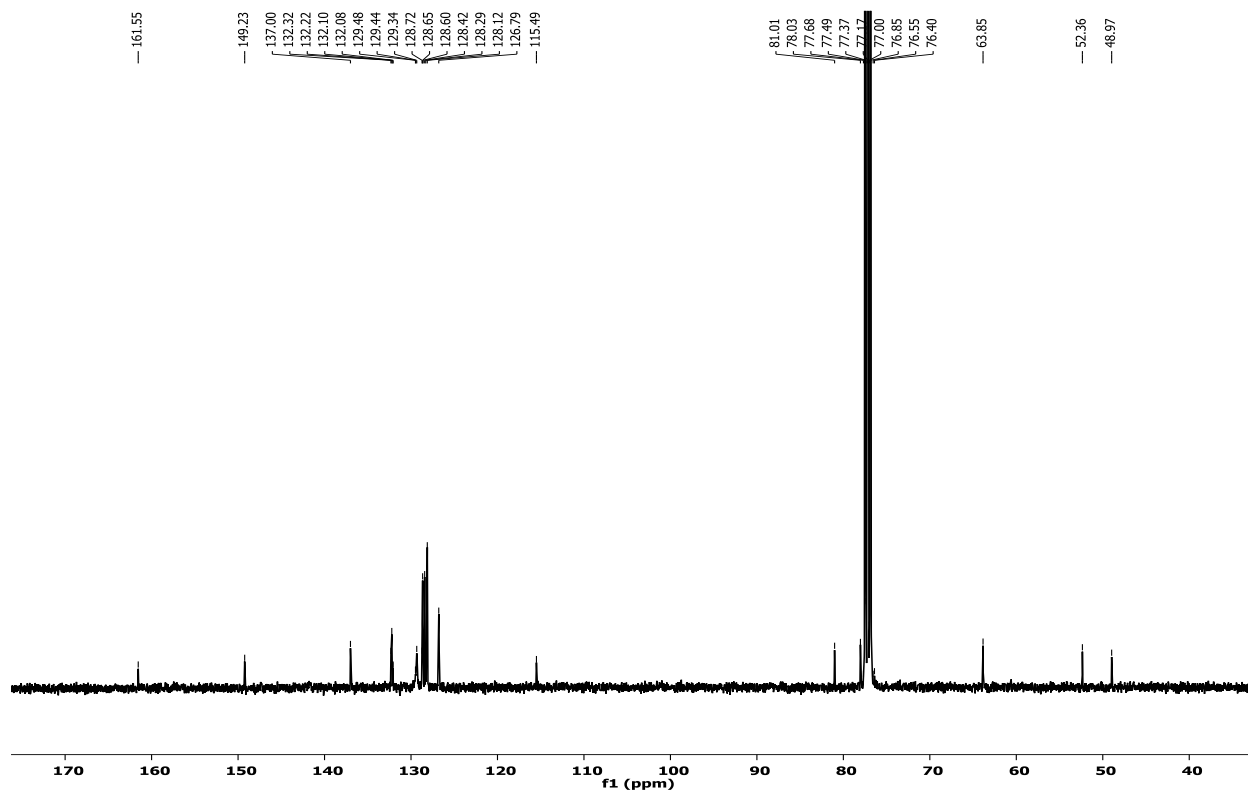



<sup>1</sup>H-NMR of compound **1e**, CDCl<sub>3</sub>, 300 MHz

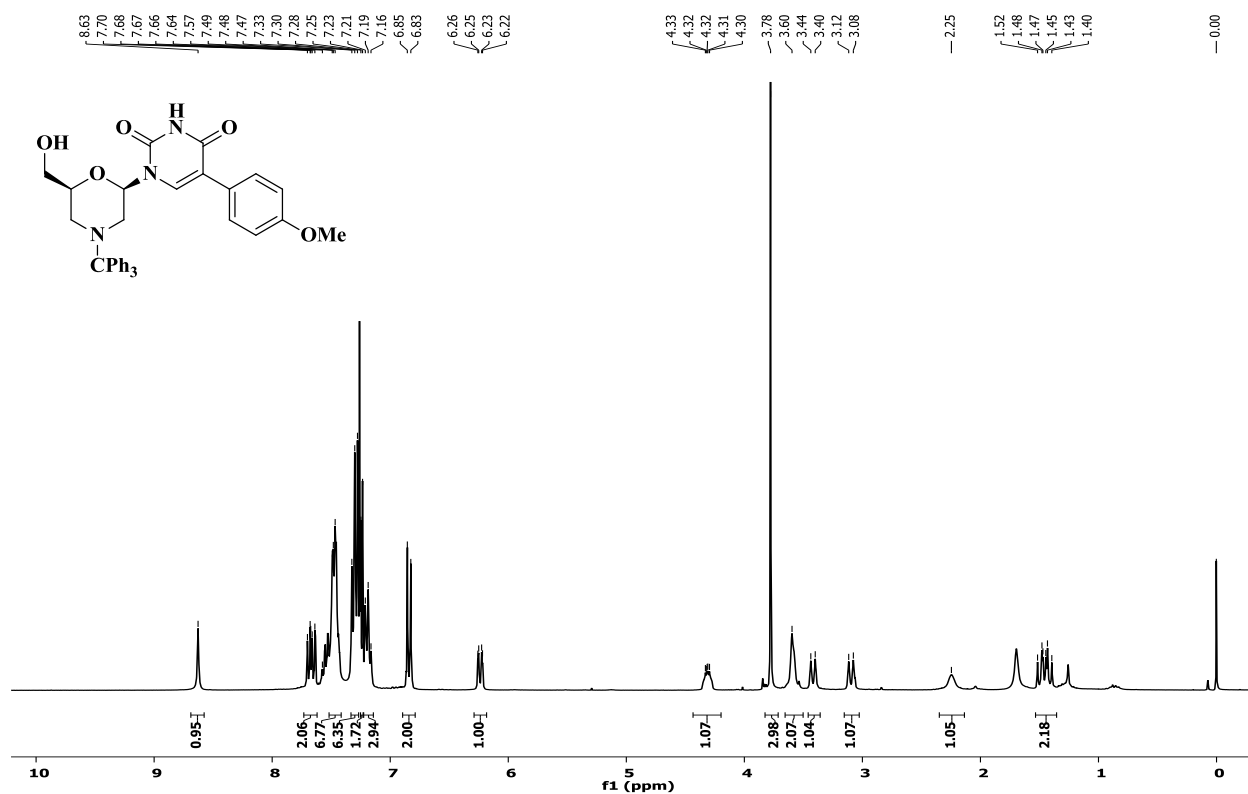

<sup>13</sup>C-NMR of compound **1e**, CDCl<sub>3</sub>, 100 MHz

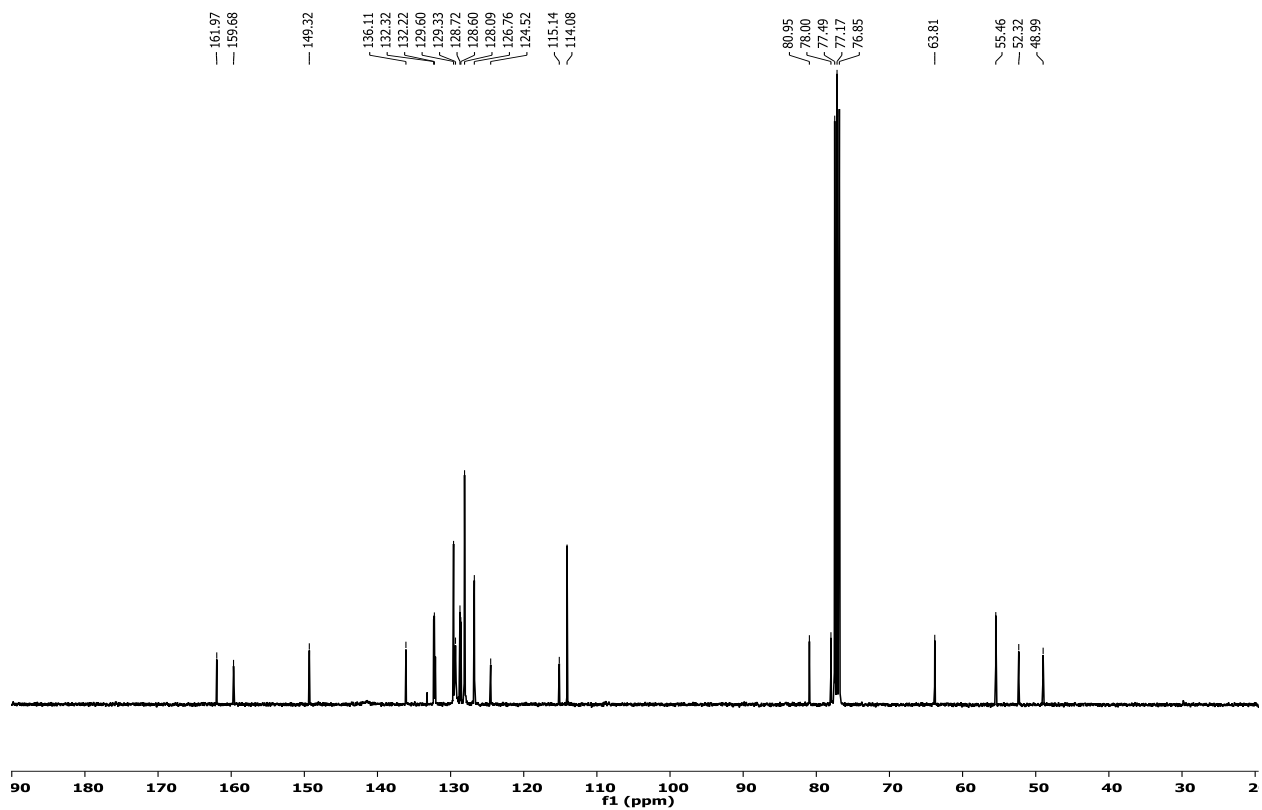

<sup>1</sup>H-NMR of compound **1f**, CDCl<sub>3</sub>, 300 MHz

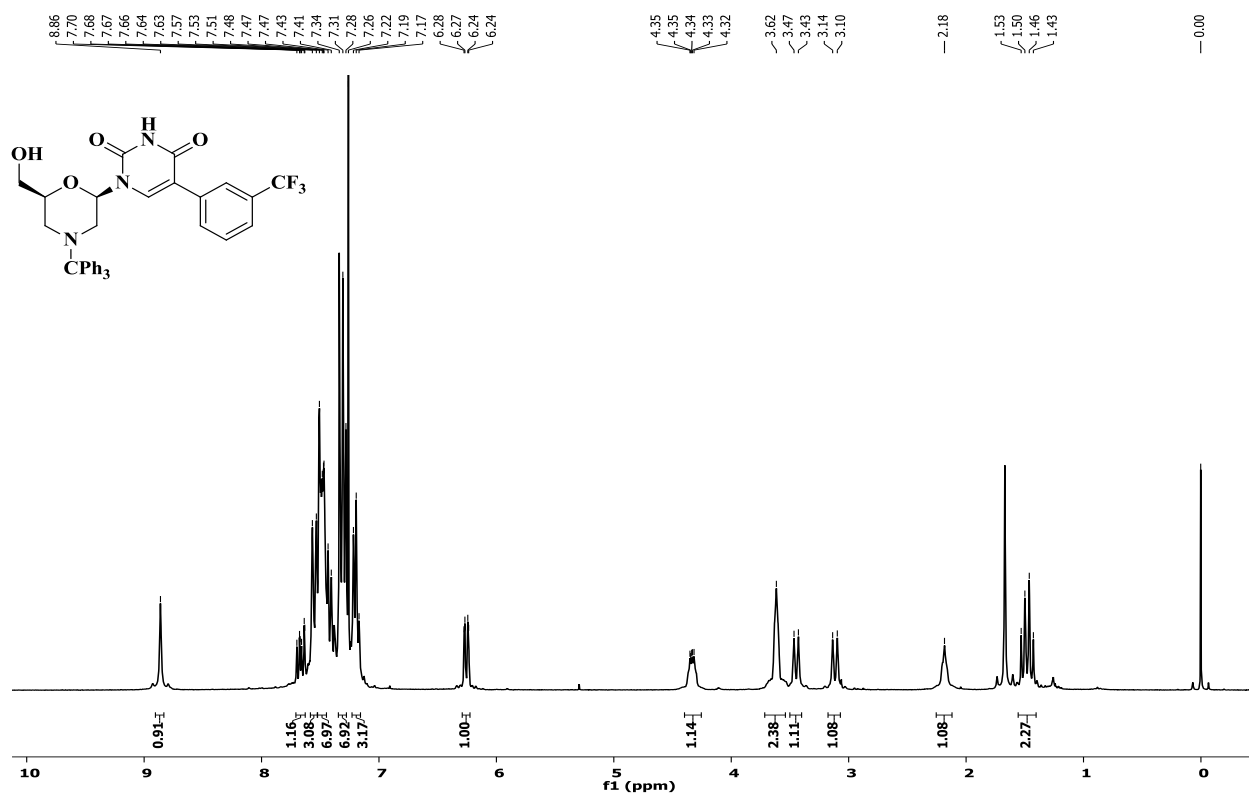

<sup>13</sup>C-NMR compound **1f**, CDCl<sub>3</sub>, 100 MHz

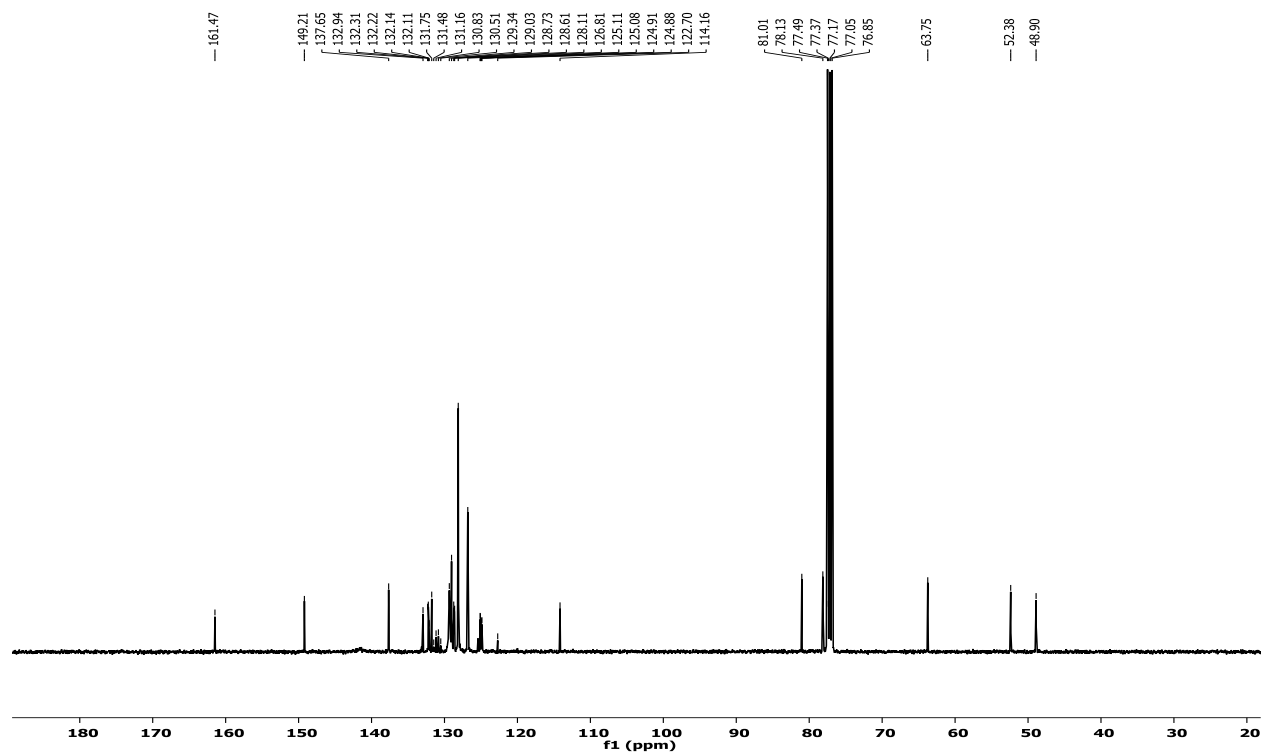

1H-NMR of compound **1g**, CDCl<sub>3</sub>, 300 MHz

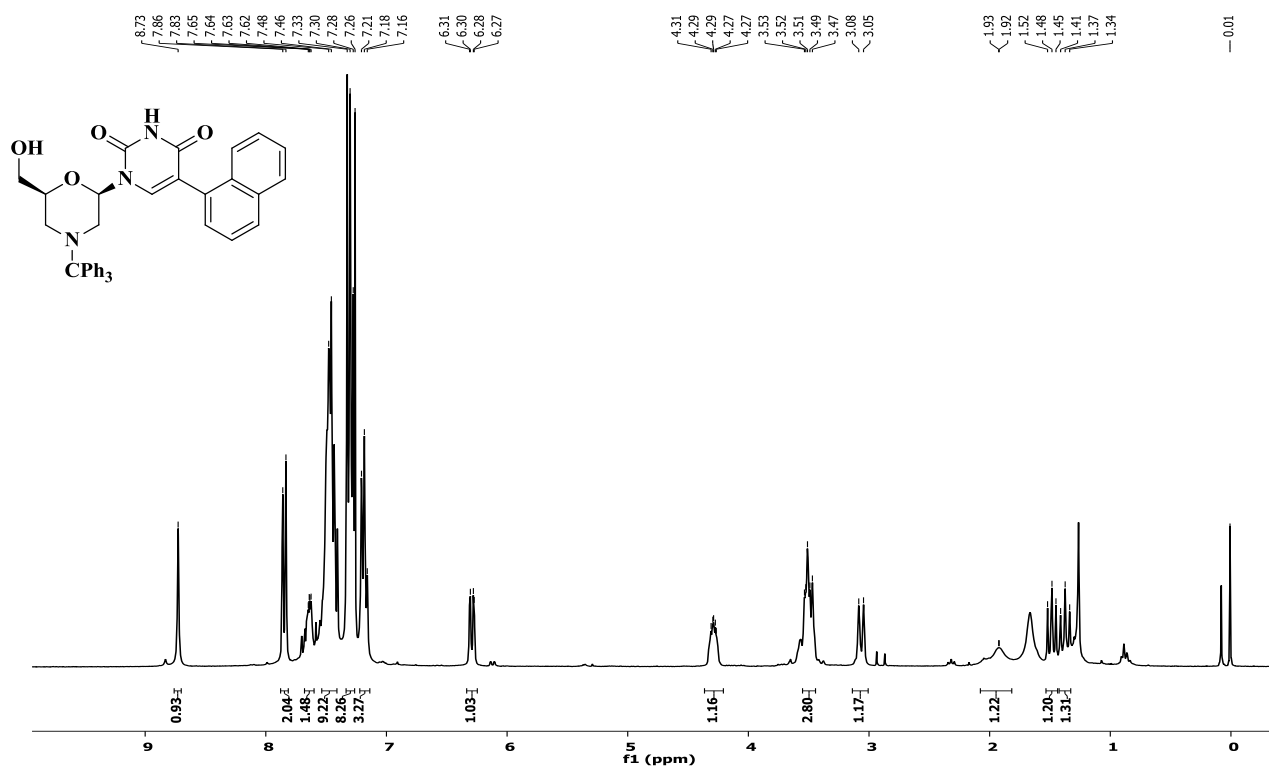

13C-NMR of compound **1g**, CDCl<sub>3</sub>, 100 MHz

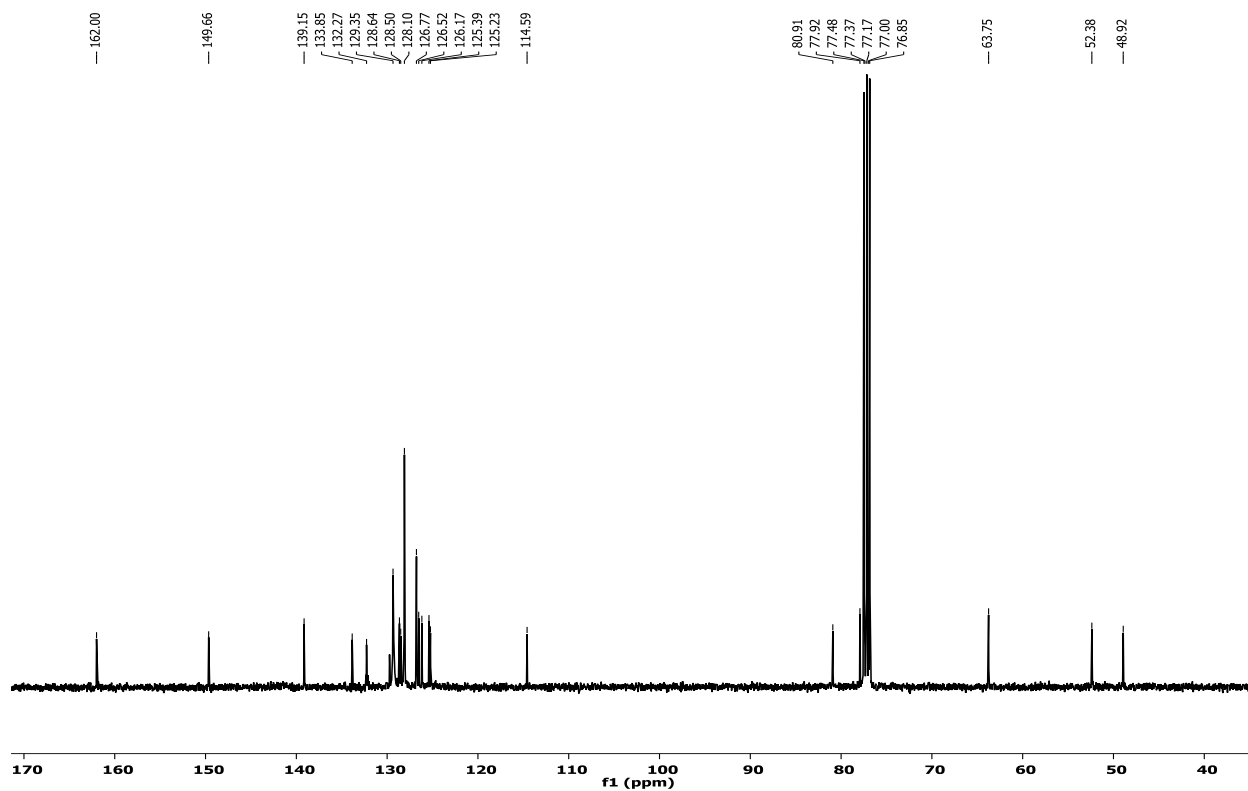

<sup>1</sup>H-NMR of compound **1h**, CDCl<sub>3</sub>, 300 MHz

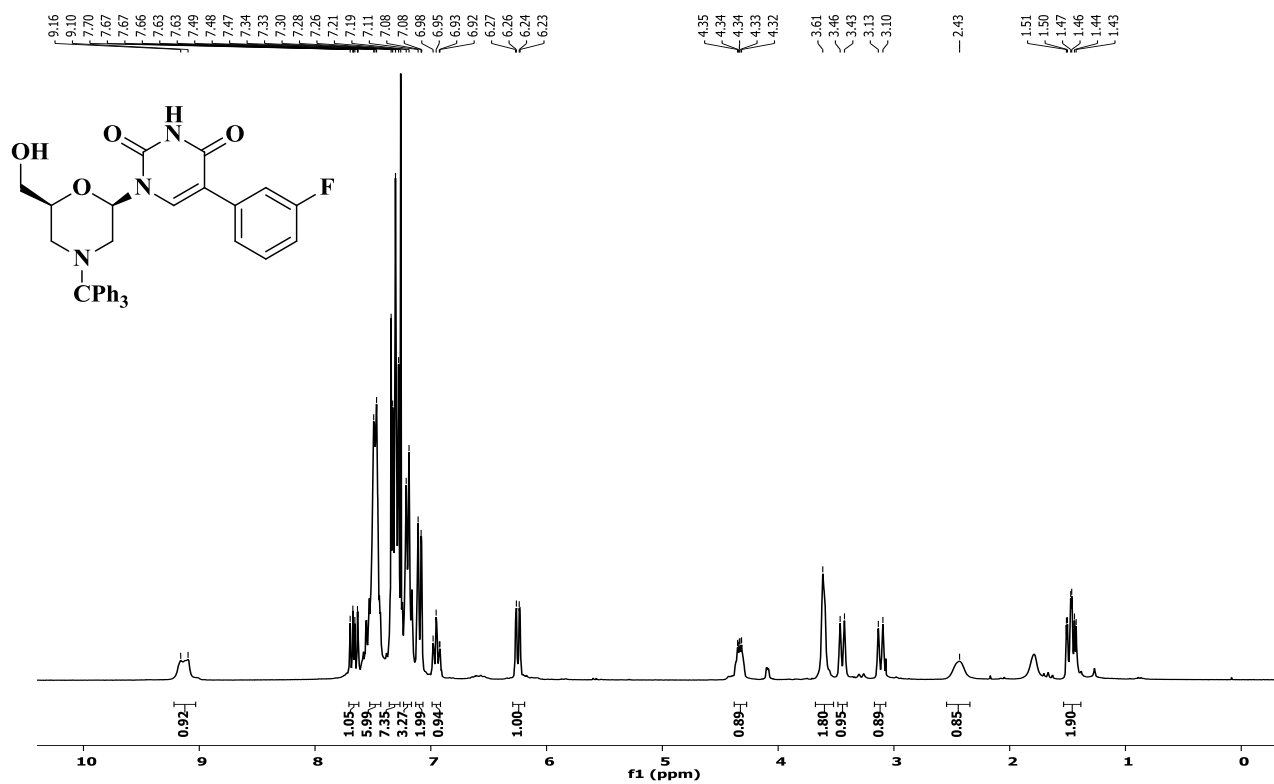

<sup>13</sup>C-NMR of compound **1h**, CDCl<sub>3</sub>, 100 MHz

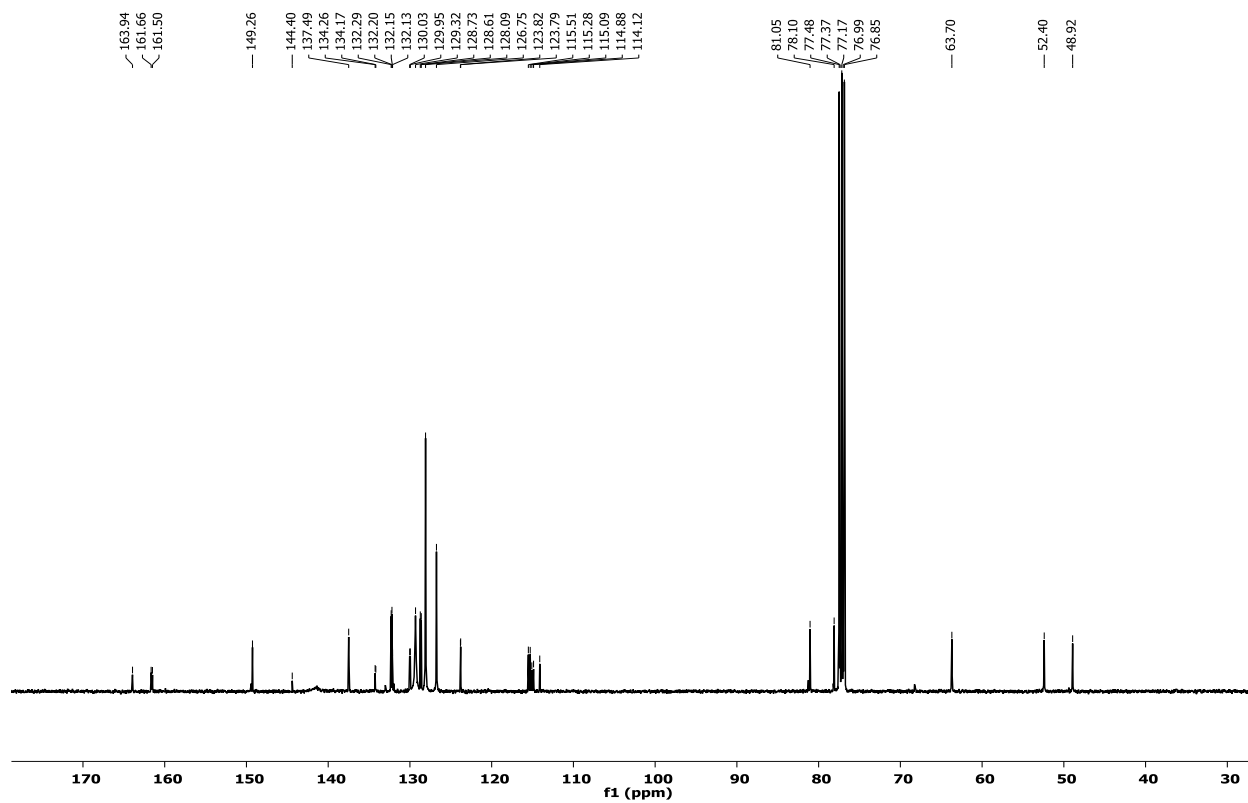

<sup>1</sup>H-NMR of compound **1i**, CDCl<sub>3</sub>, 300 MHz

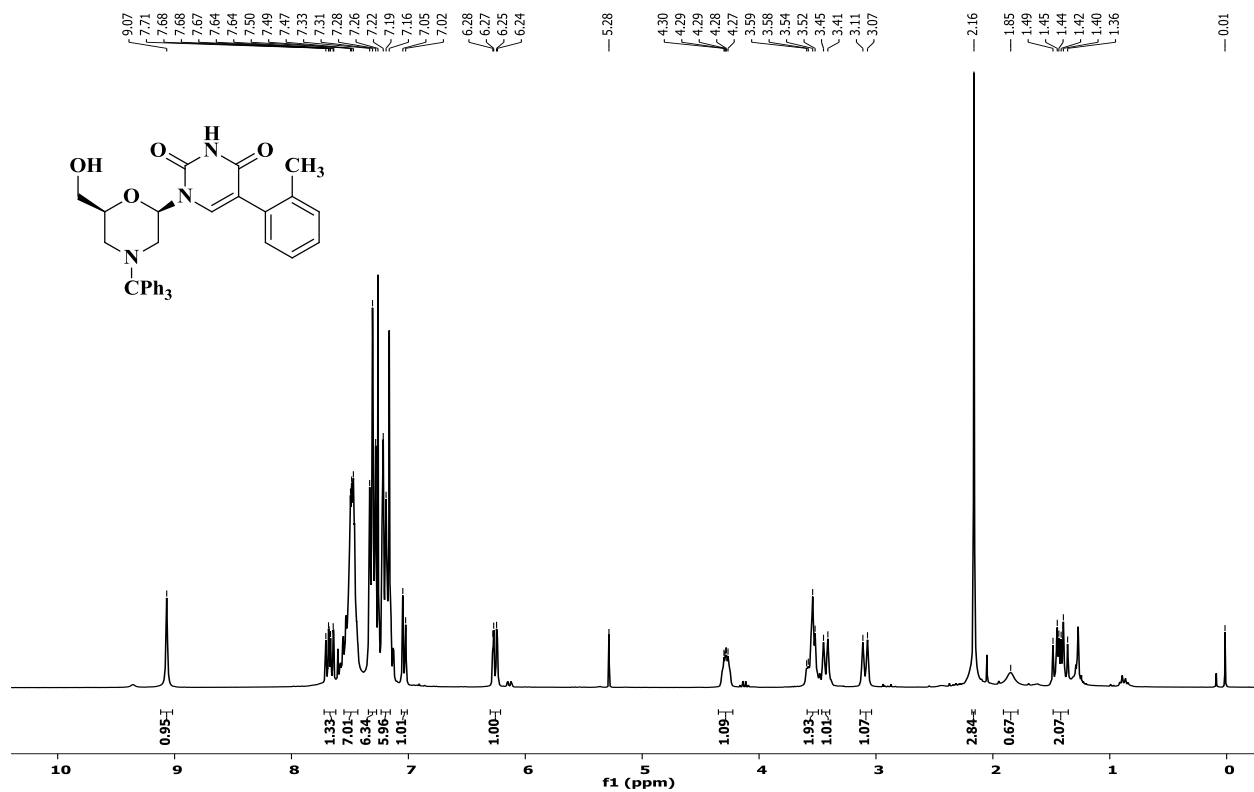

<sup>13</sup>C-NMR of compound **1i**, CDCl<sub>3</sub>, 100 MHz

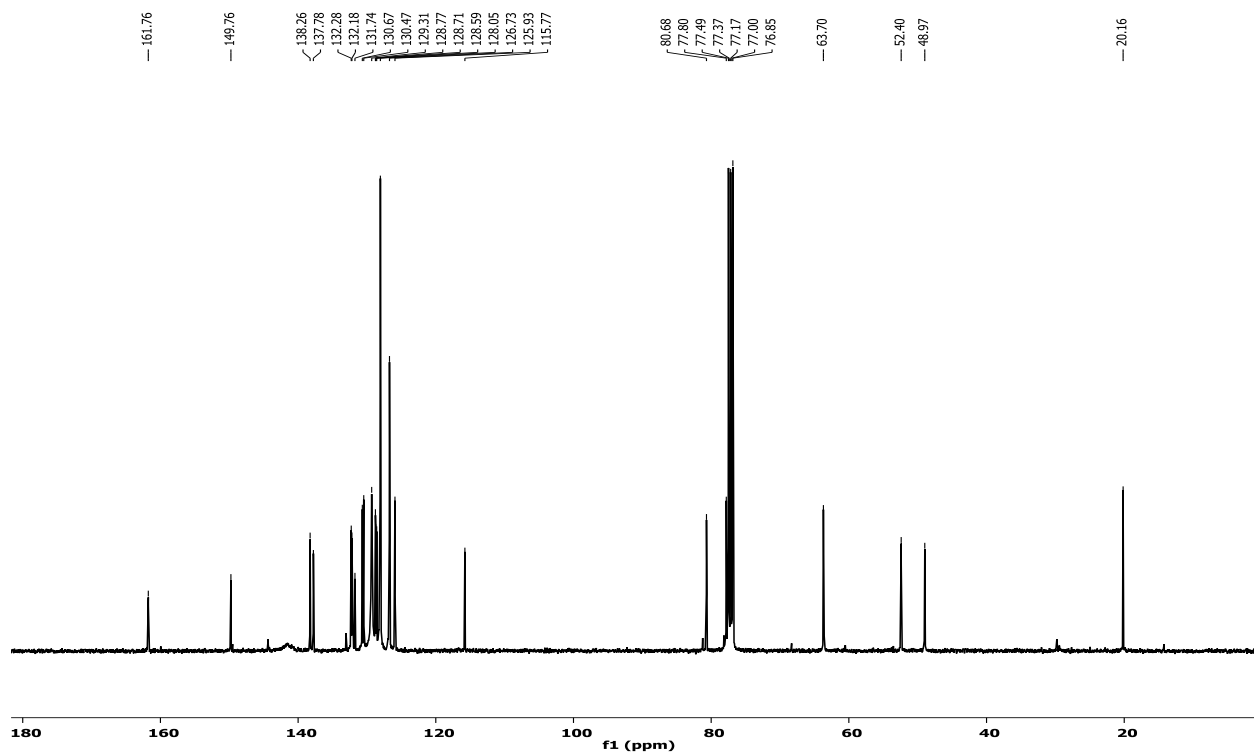

<sup>1</sup>H-NMR of compound **1j**, CDCl<sub>3</sub>, 300 MHz

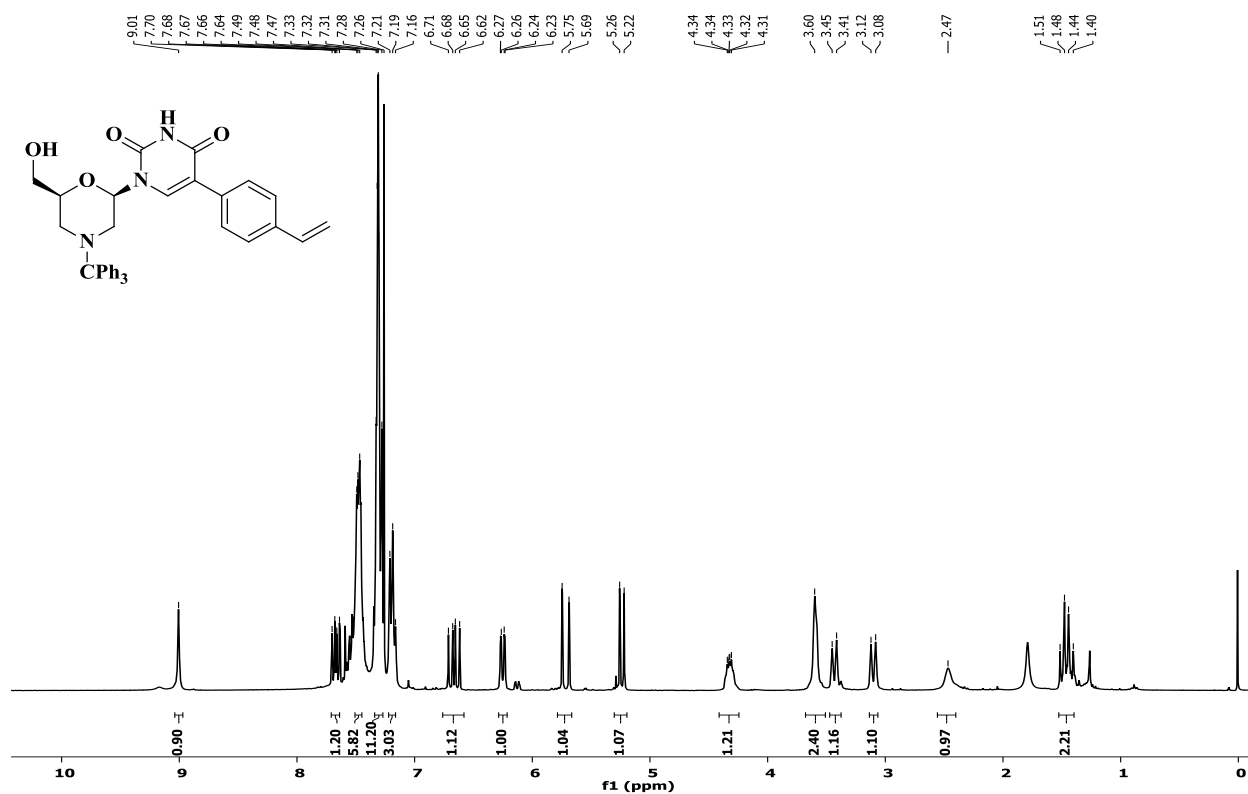

<sup>13</sup>C-NMR of compound **1j**, CDCl<sub>3</sub>, 100 MHz

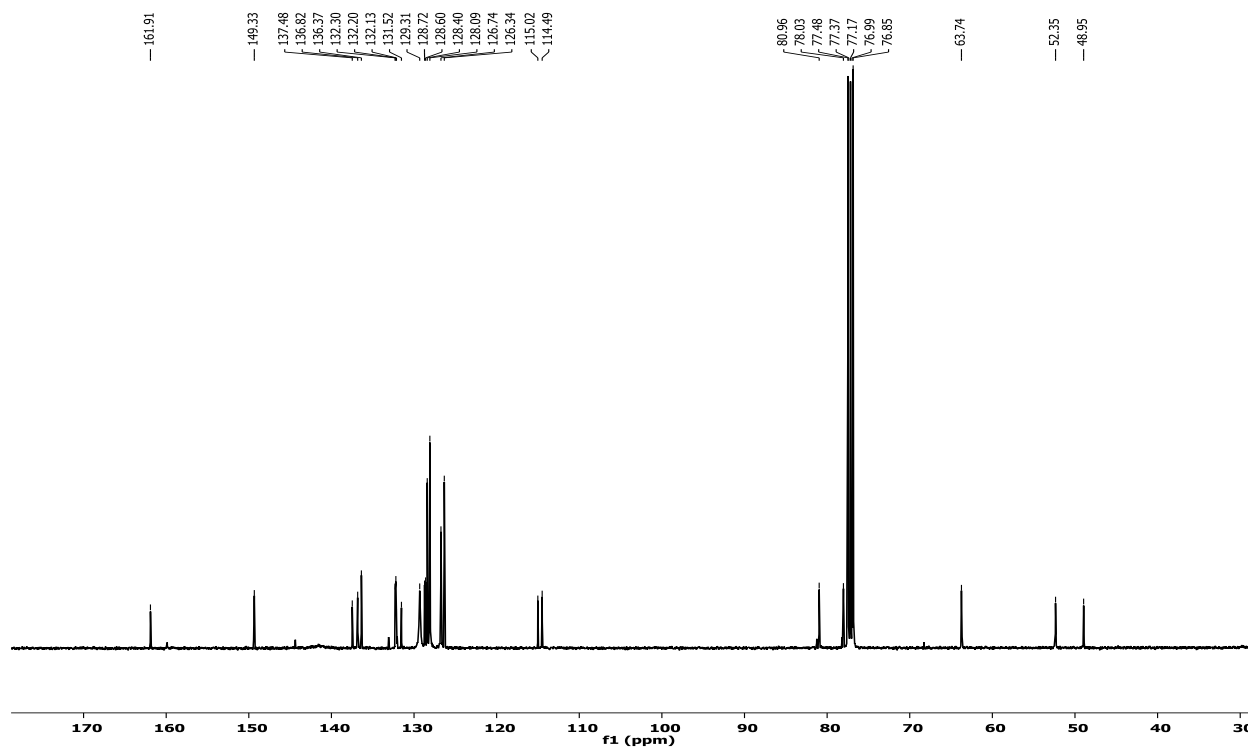

<sup>1</sup>H-NMR of compound **1k**, CDCl<sub>3</sub>, 300 MHz

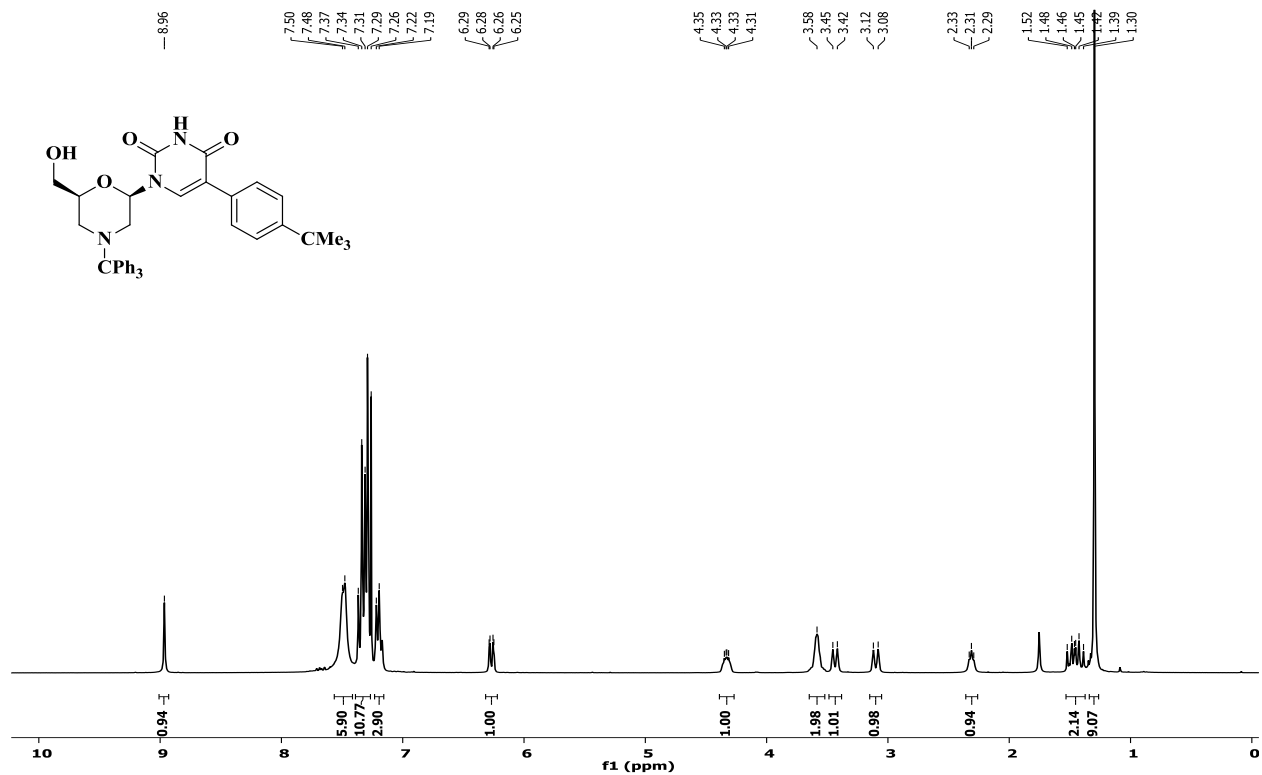

<sup>13</sup>C-NMR of compound **1k**, CDCl<sub>3</sub>, 100 MHz

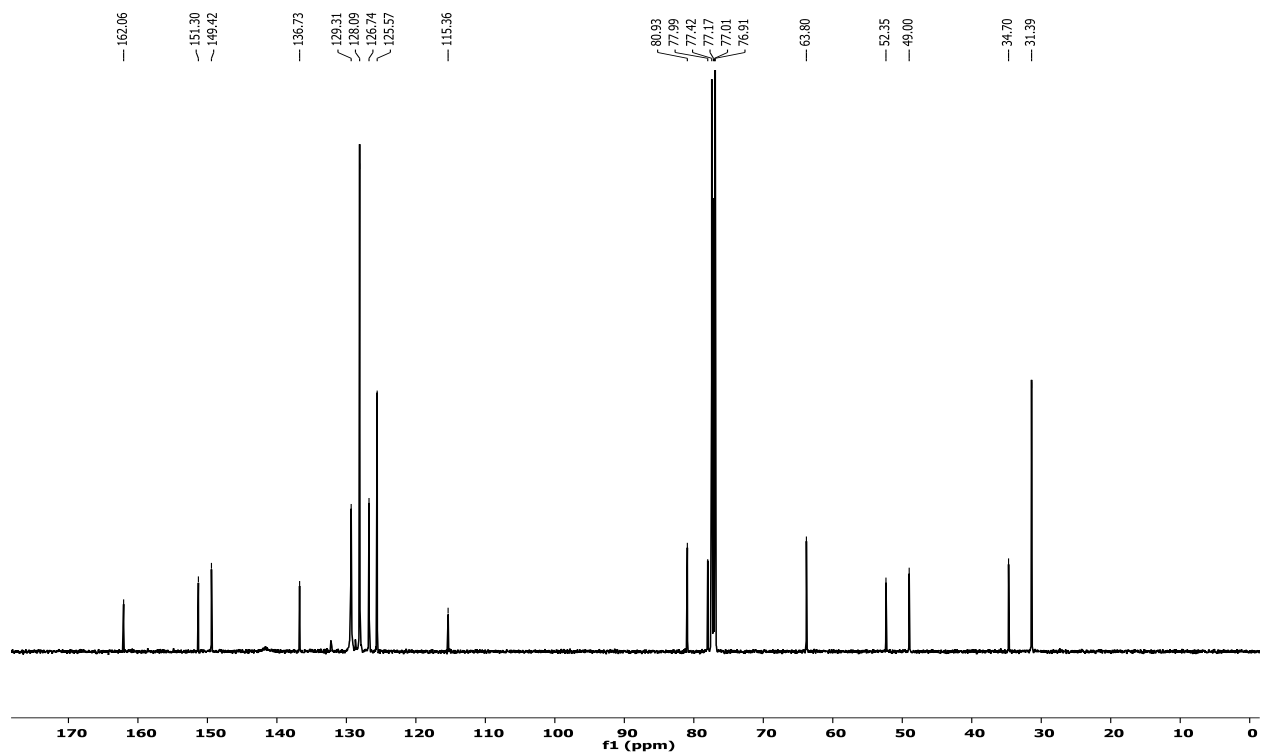

<sup>1</sup>H-NMR of compound **11**, CDCl<sub>3</sub>, 300 MHz

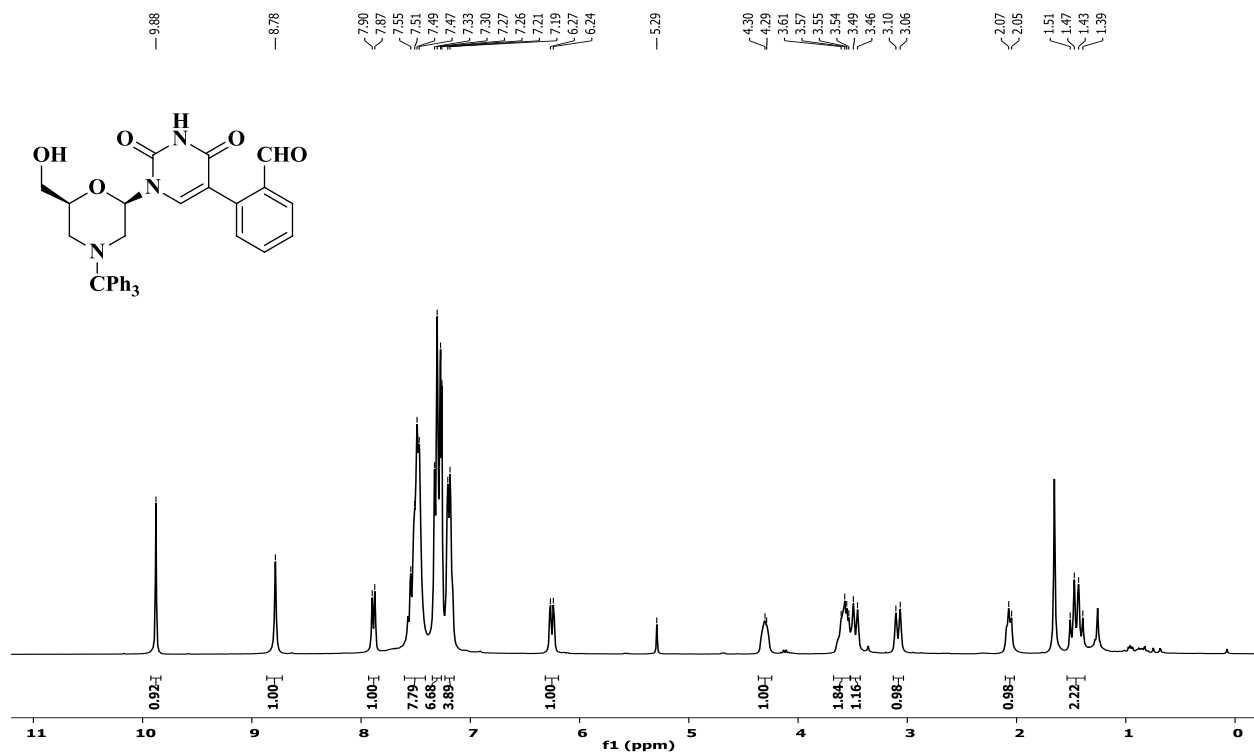

<sup>13</sup>C-NMR of compound **11**, CDCl<sub>3</sub>, 100 MHz

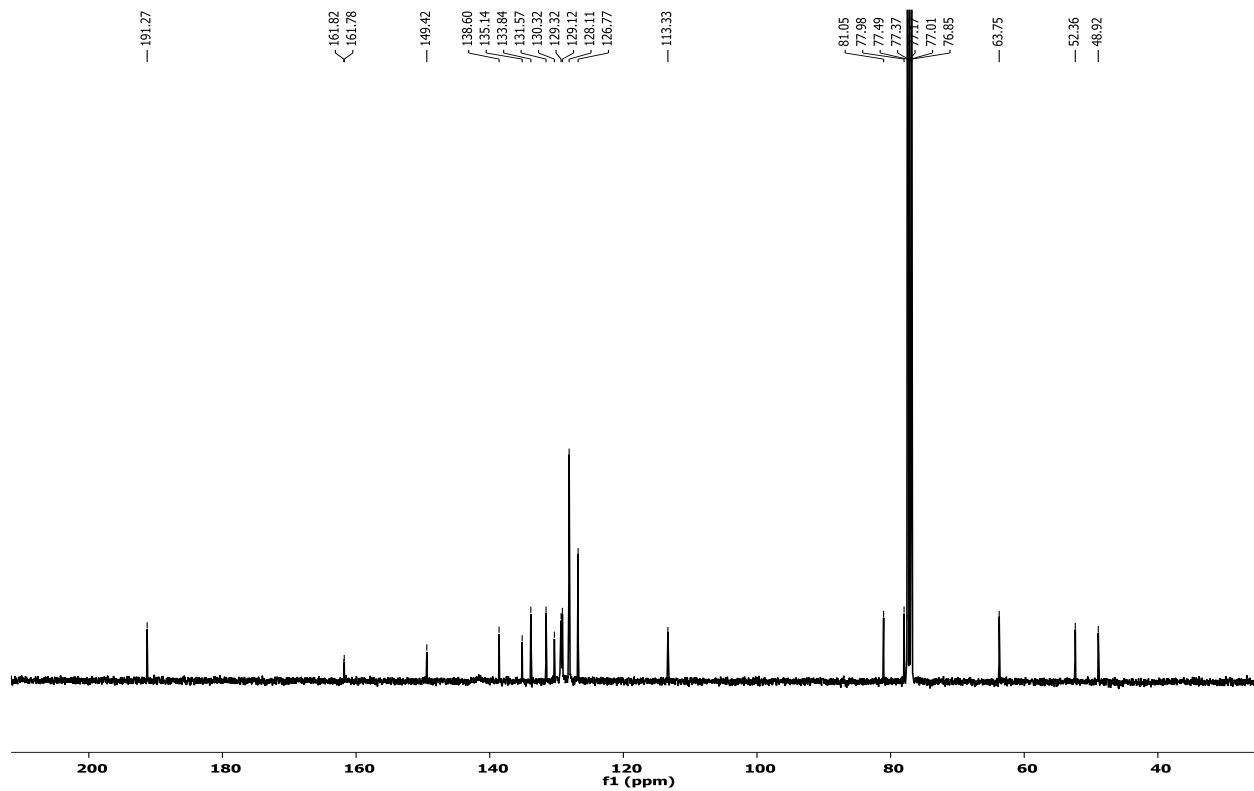



<sup>1</sup>H-NMR of compound **2c**, CDCl<sub>3</sub>, 300 MHz

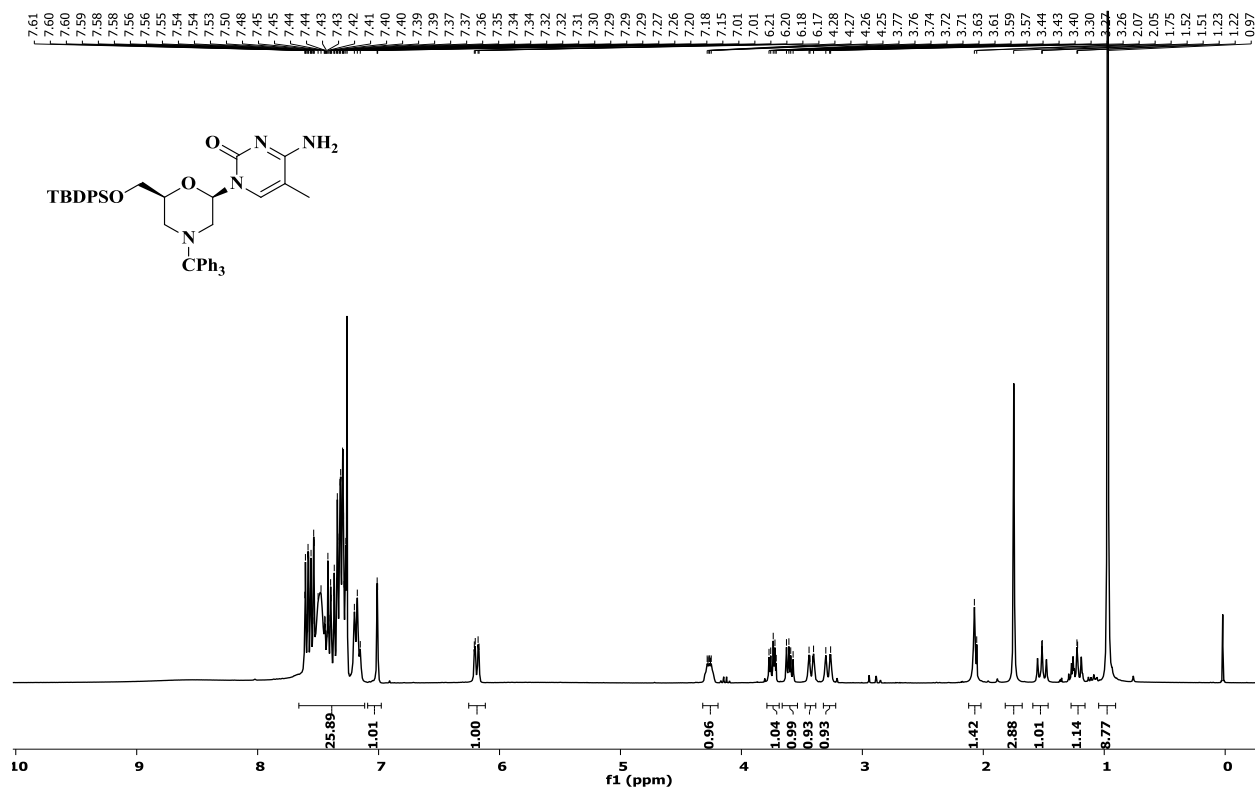

<sup>13</sup>C-NMR of compound **2c**, CDCl<sub>3</sub>, 100 MHz

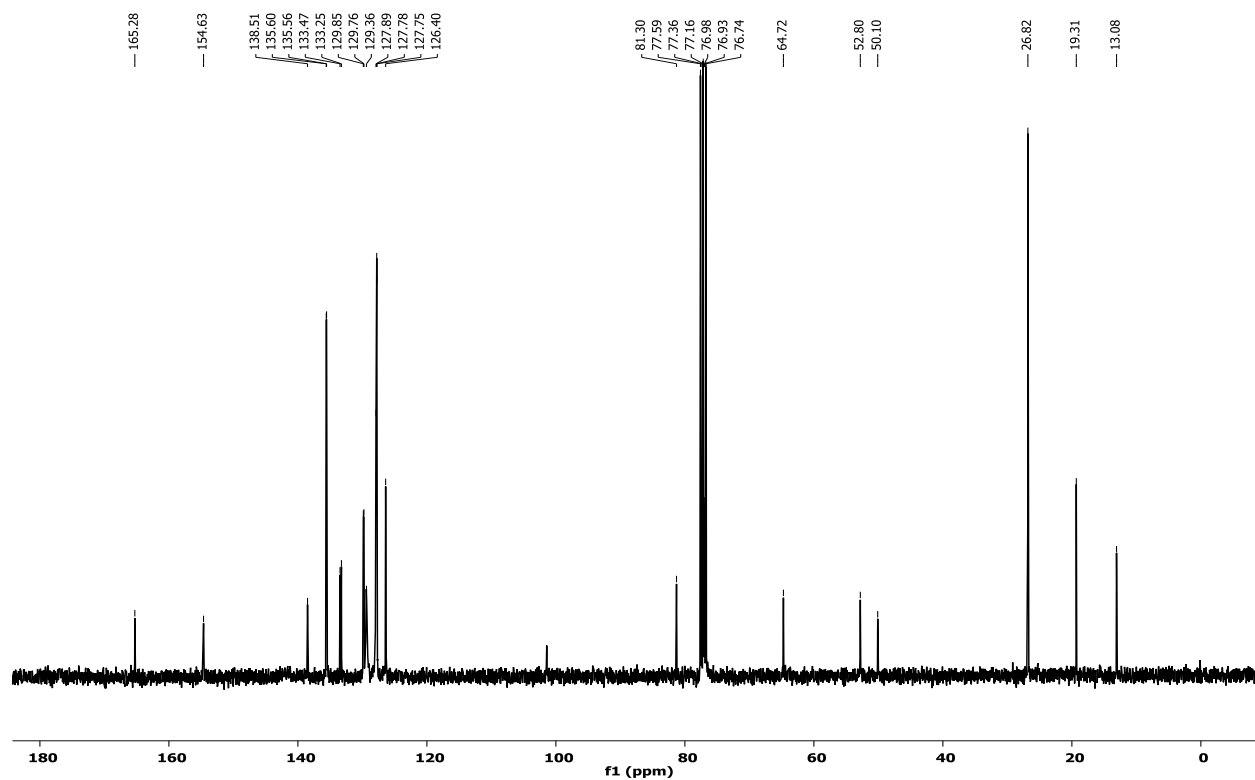

1H-NMR of compound **3a**, CDCl<sub>3</sub>, 300 MHz

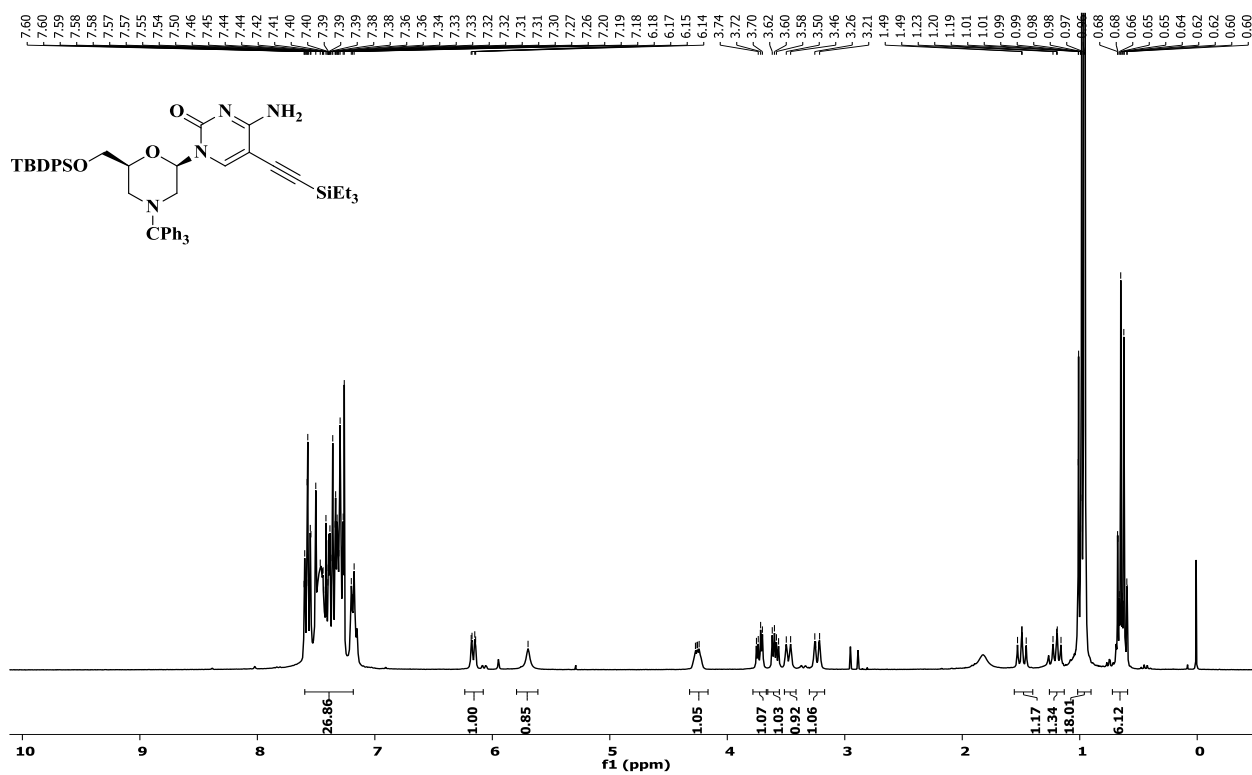

1H-NMR of compound **3a**, CDCl<sub>3</sub>, 75 MHz

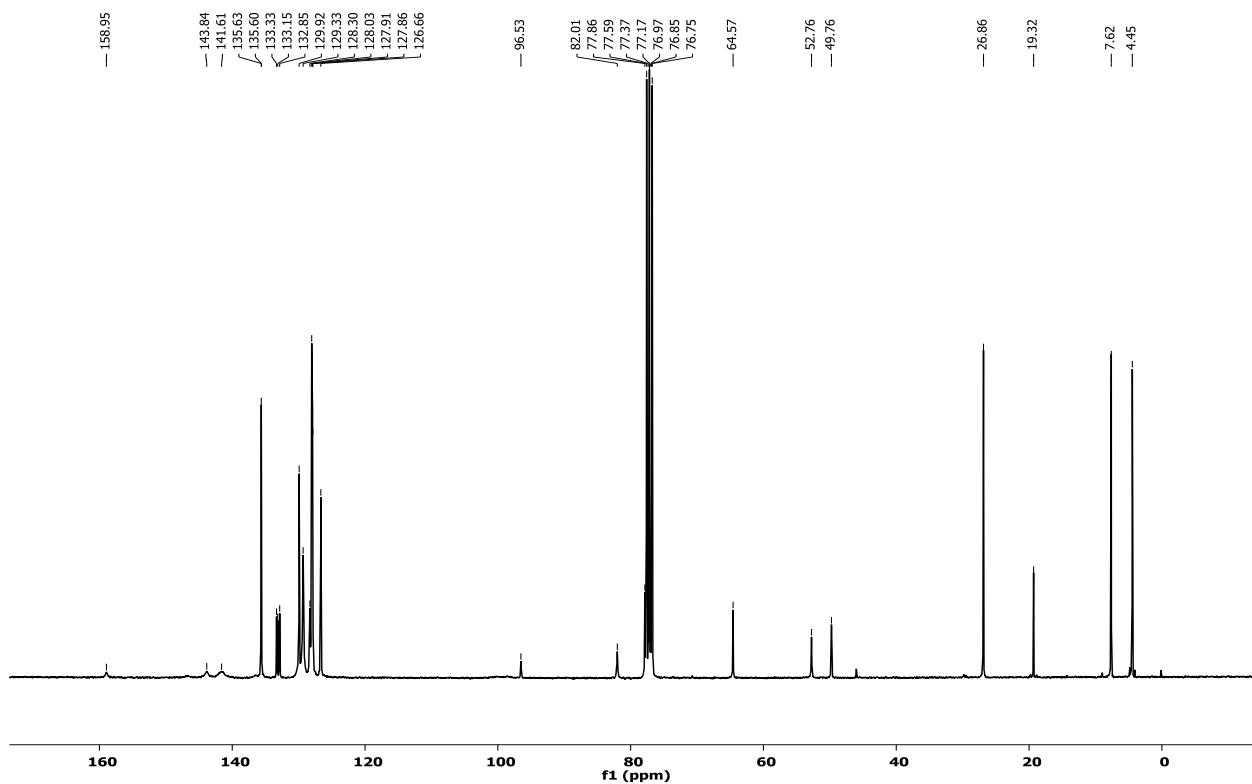

<sup>1</sup>H-NMR of compound **3e**, CDCl<sub>3</sub>, 300 MHz

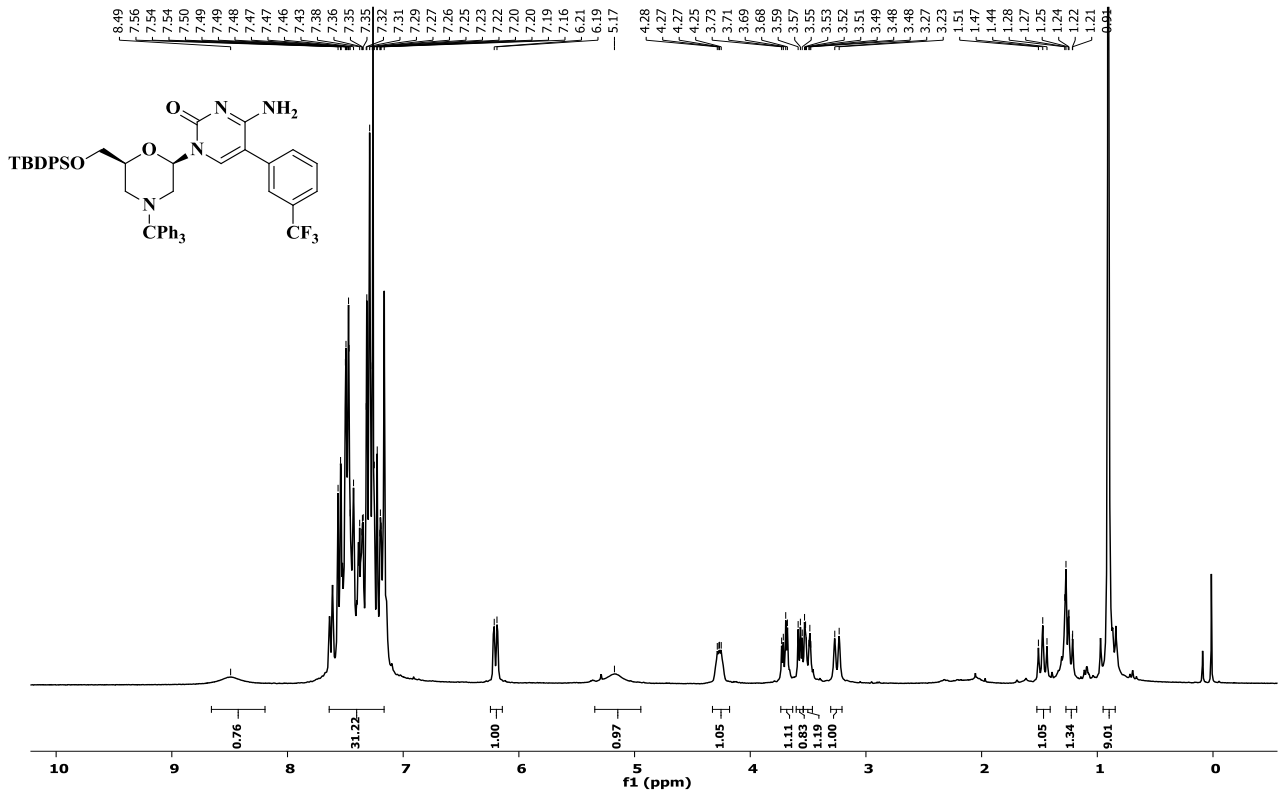

<sup>13</sup>C-NMR of compound **3e**, CDCl<sub>3</sub>, 100 MHz

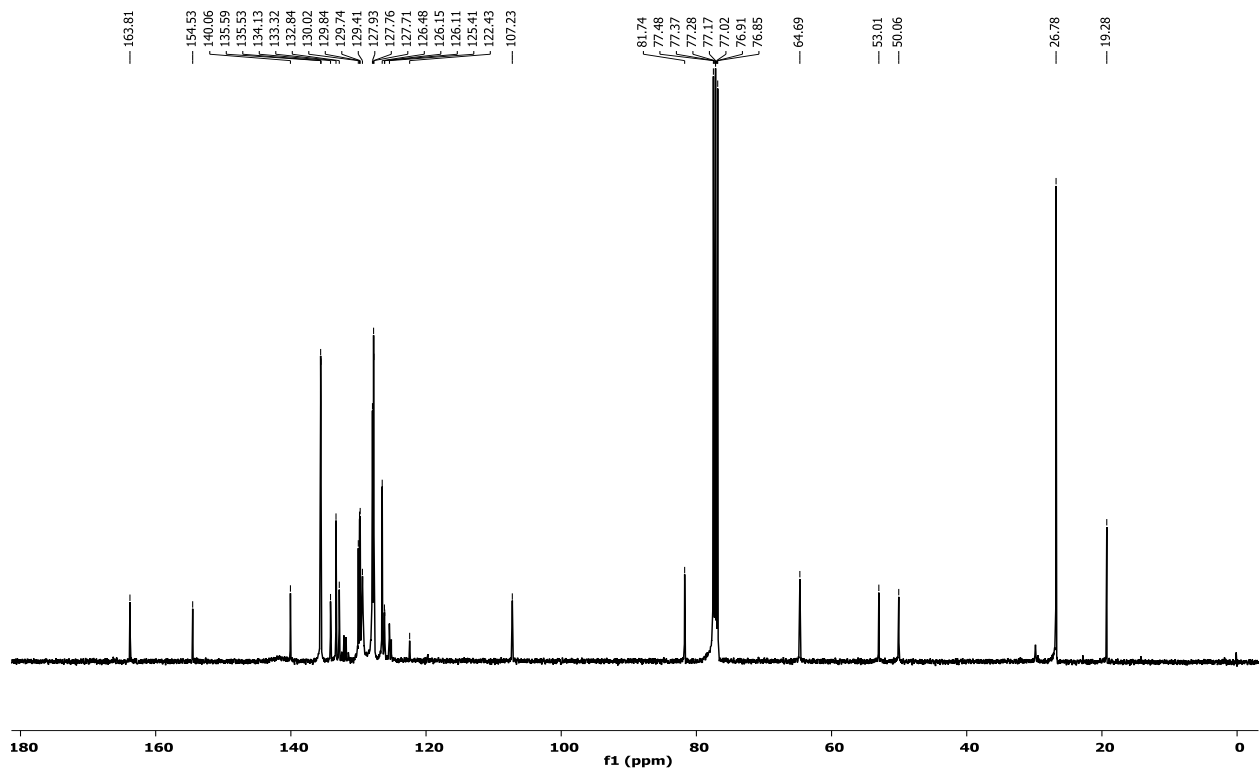

1H-NMR of compound **4a**, CDCl<sub>3</sub>, 300 MHz

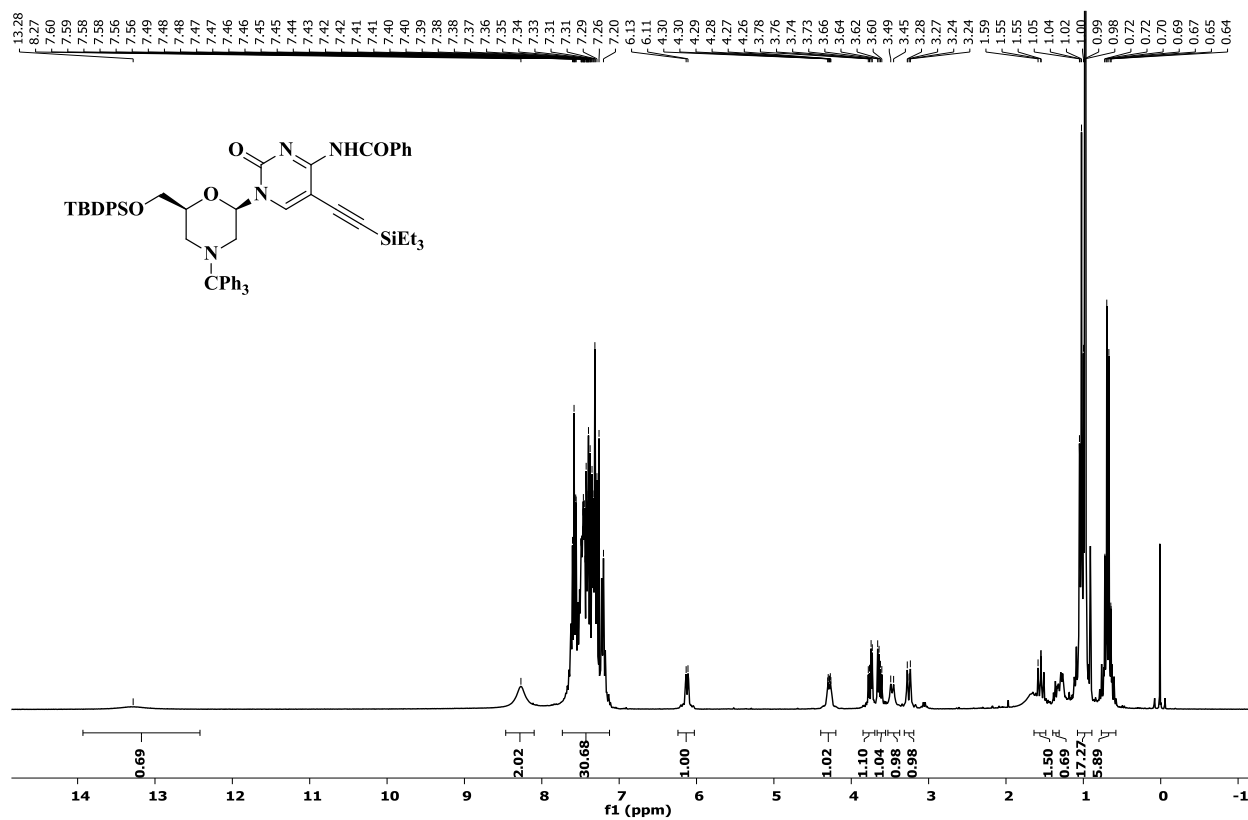

13C-NMR of compound **4a**, CDCl<sub>3</sub>, 75 MHz

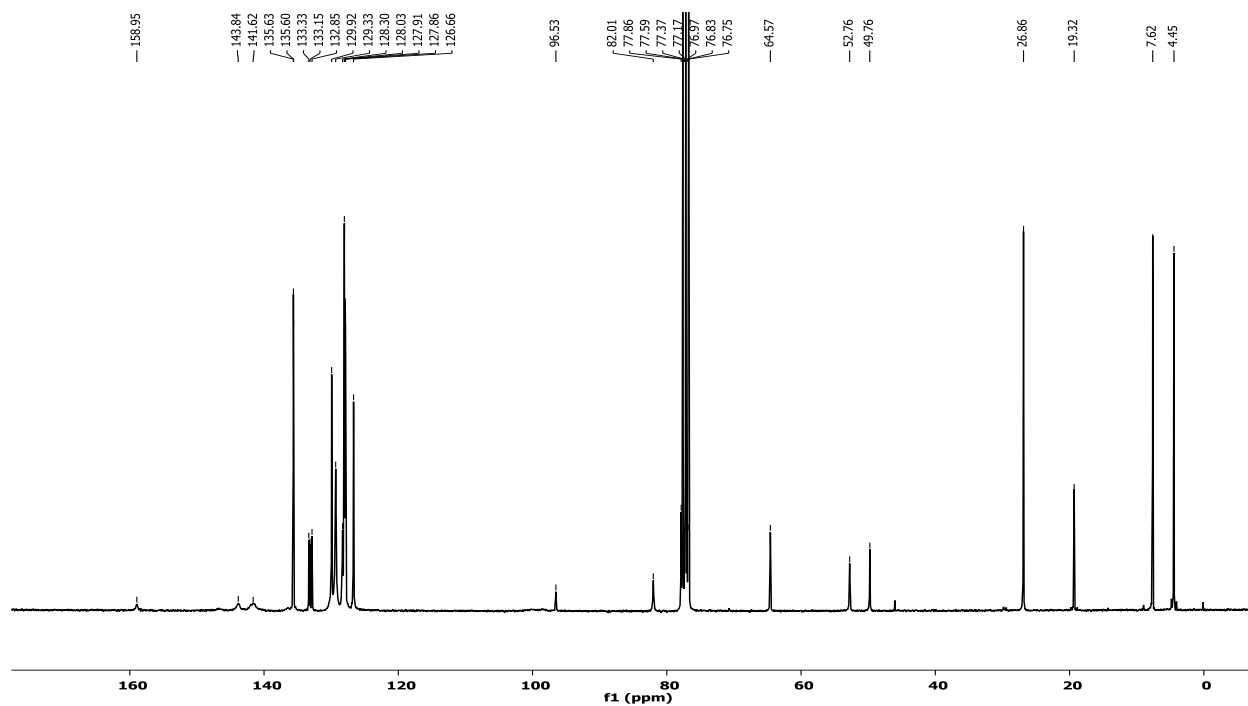

<sup>1</sup>H-NMR of compound **4b**, CDCl<sub>3</sub>, 300 MHz

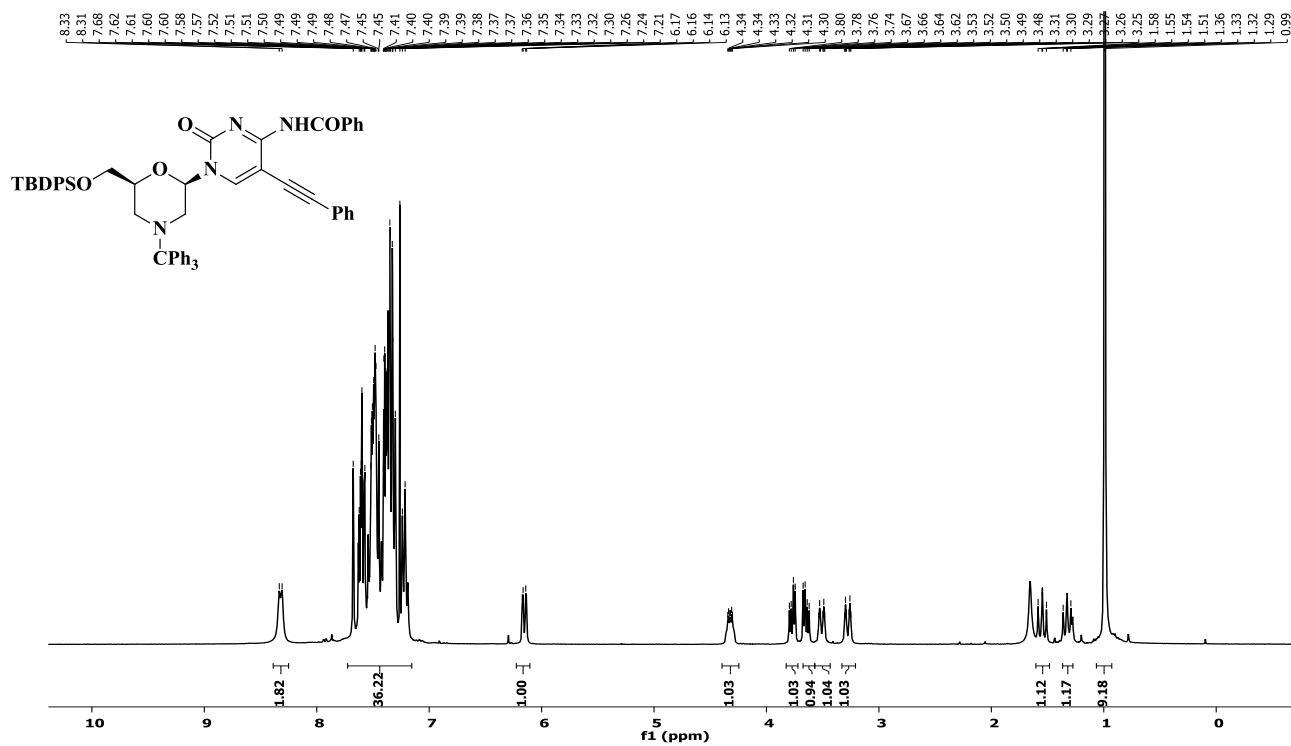

<sup>13</sup>C-NMR of compound **4b**, CDCl<sub>3</sub>, 75 MHz

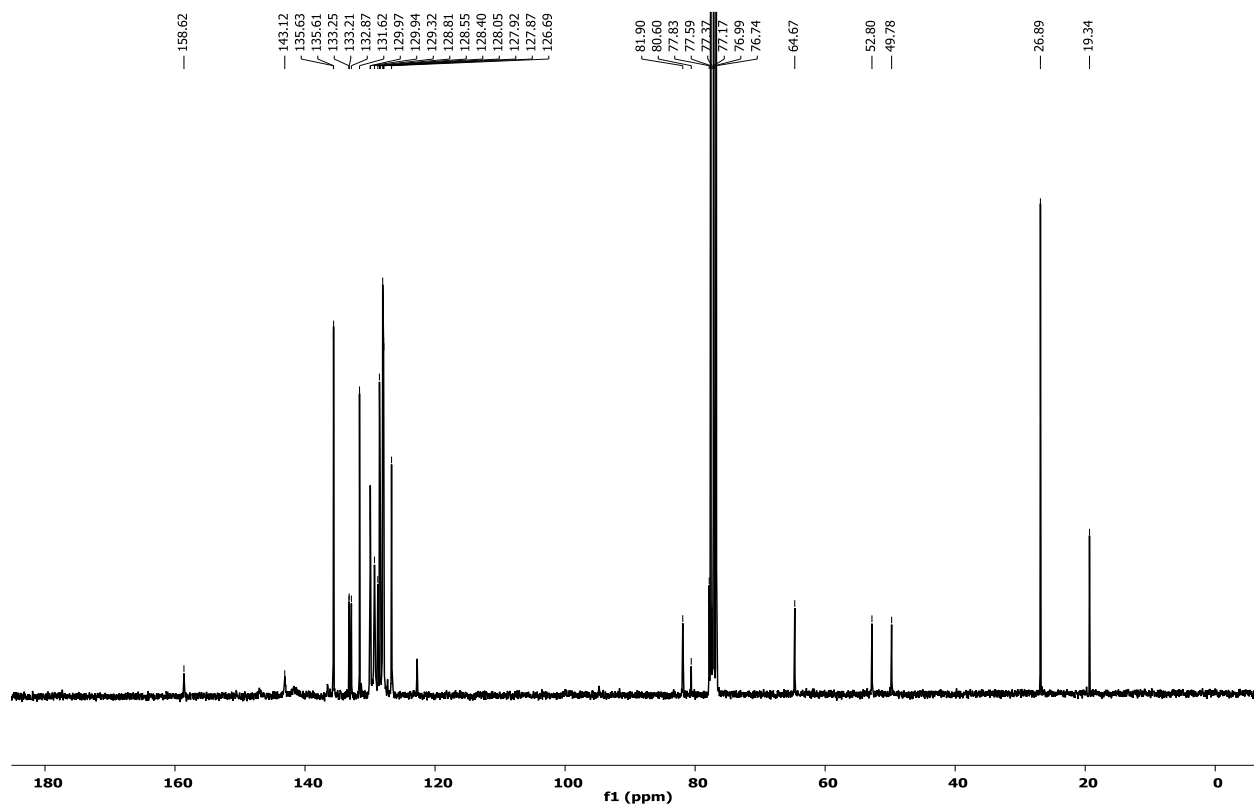

<sup>1</sup>H-NMR of compound **4c**, CDCl<sub>3</sub>, 300 MHz

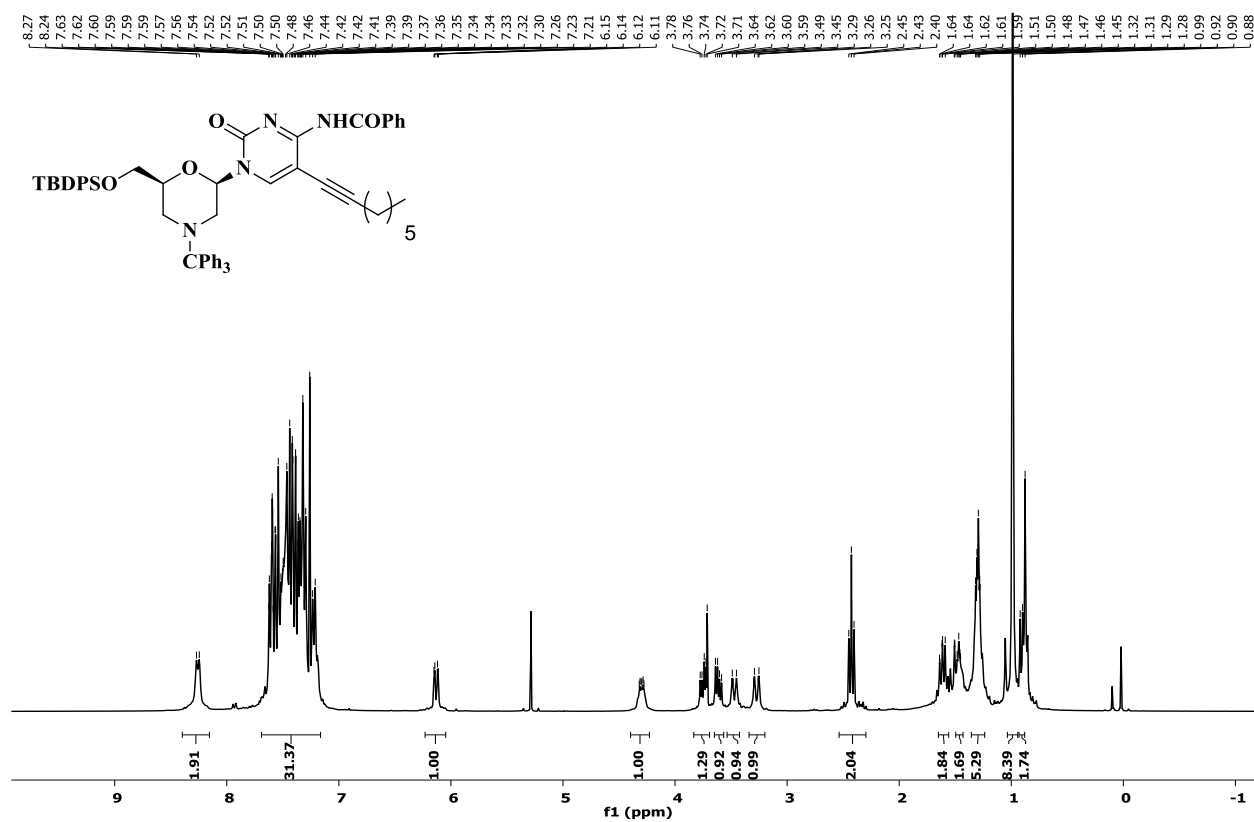

<sup>13</sup>C-NMR of compound **4c**, CDCl<sub>3</sub>, 100 MHz

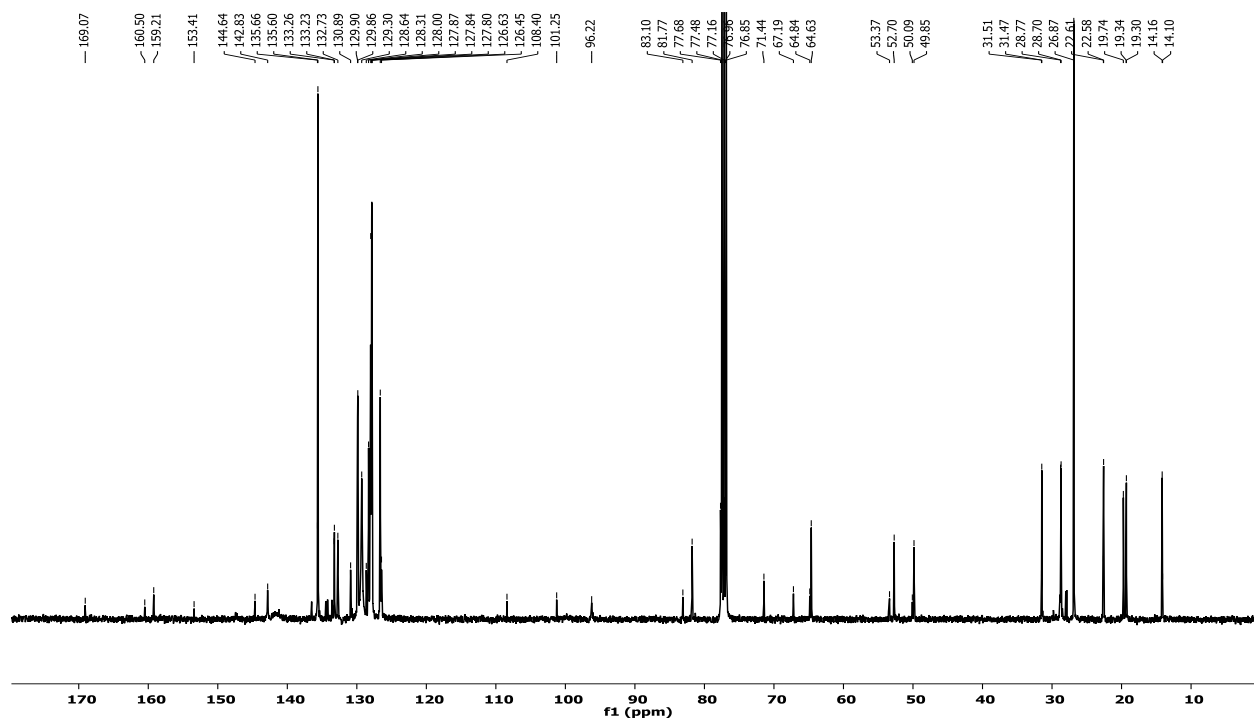

1H-NMR of compound **4d**, CDCl<sub>3</sub>, 300 MHz

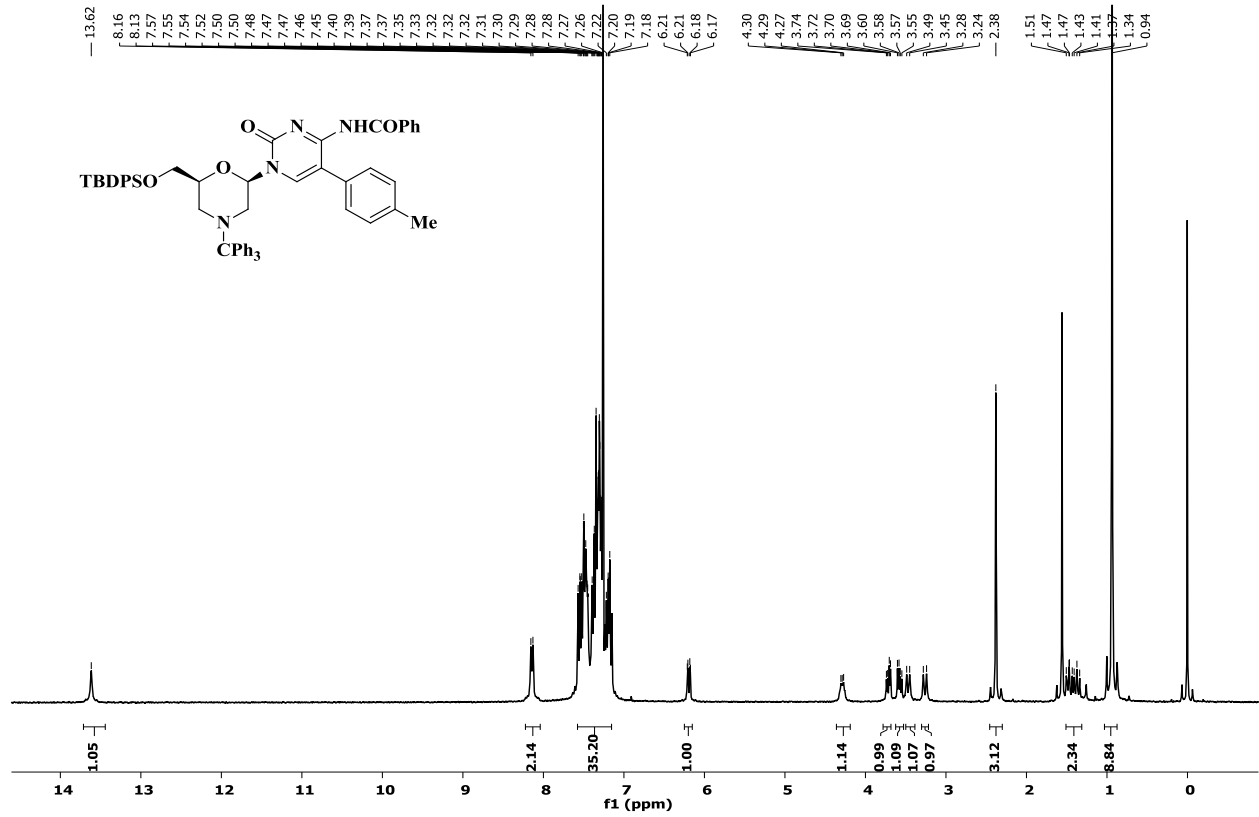

13C-NMR of compound **4d**, CDCl<sub>3</sub>, 100 MHz

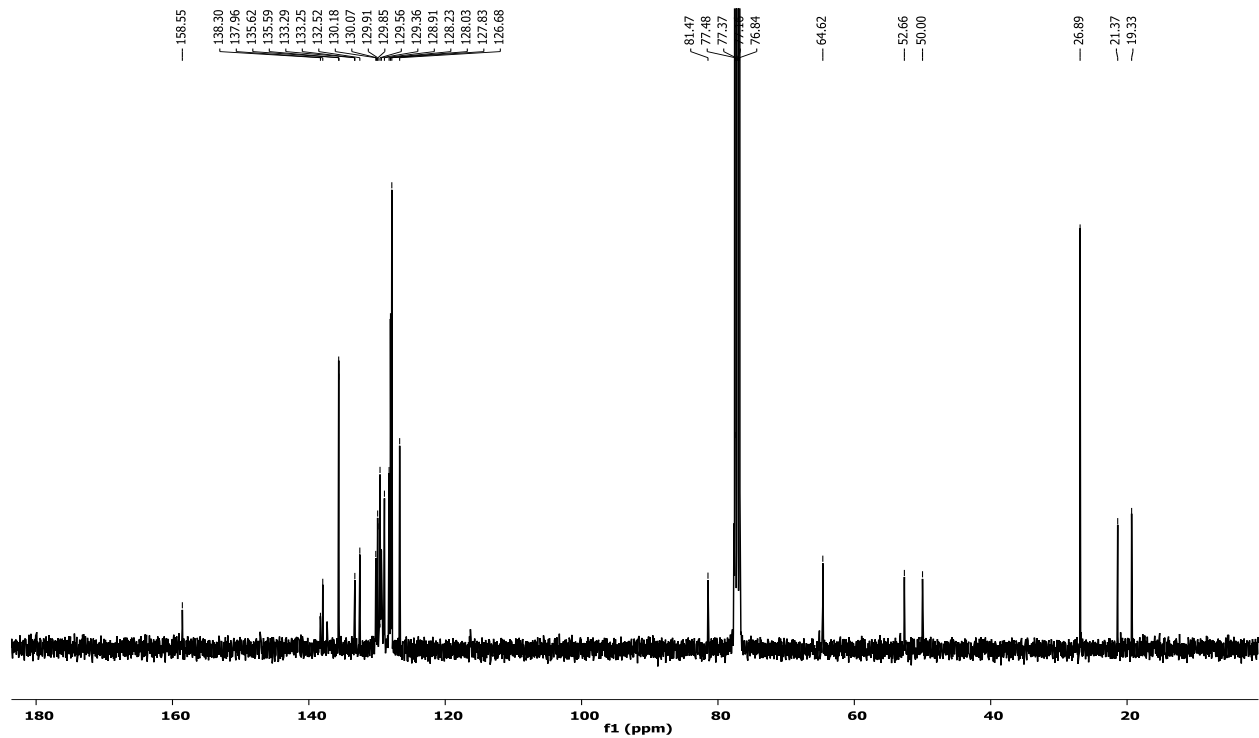

<sup>1</sup>H-NMR of compound **4e**, CDCl<sub>3</sub>, 300 MHz

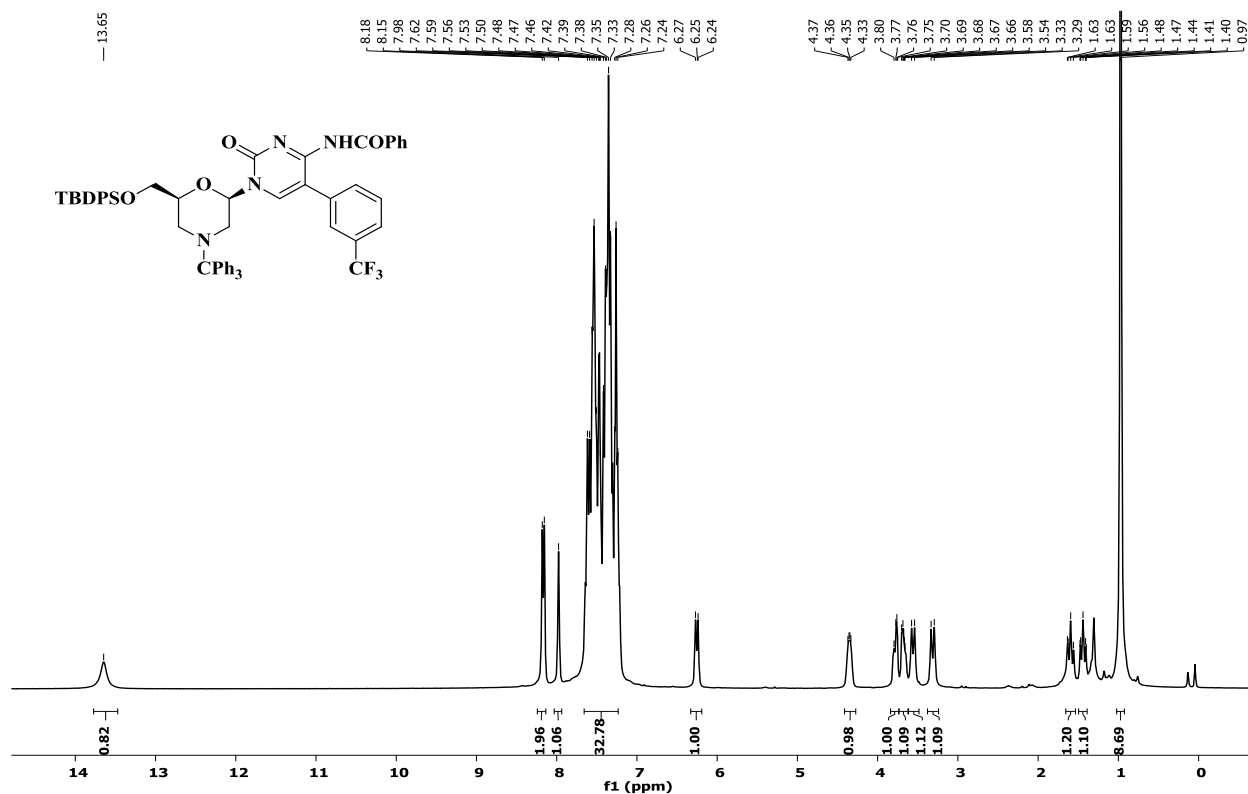

<sup>13</sup>C-NMR of compound **4e**, CDCl<sub>3</sub>, 100 MHz

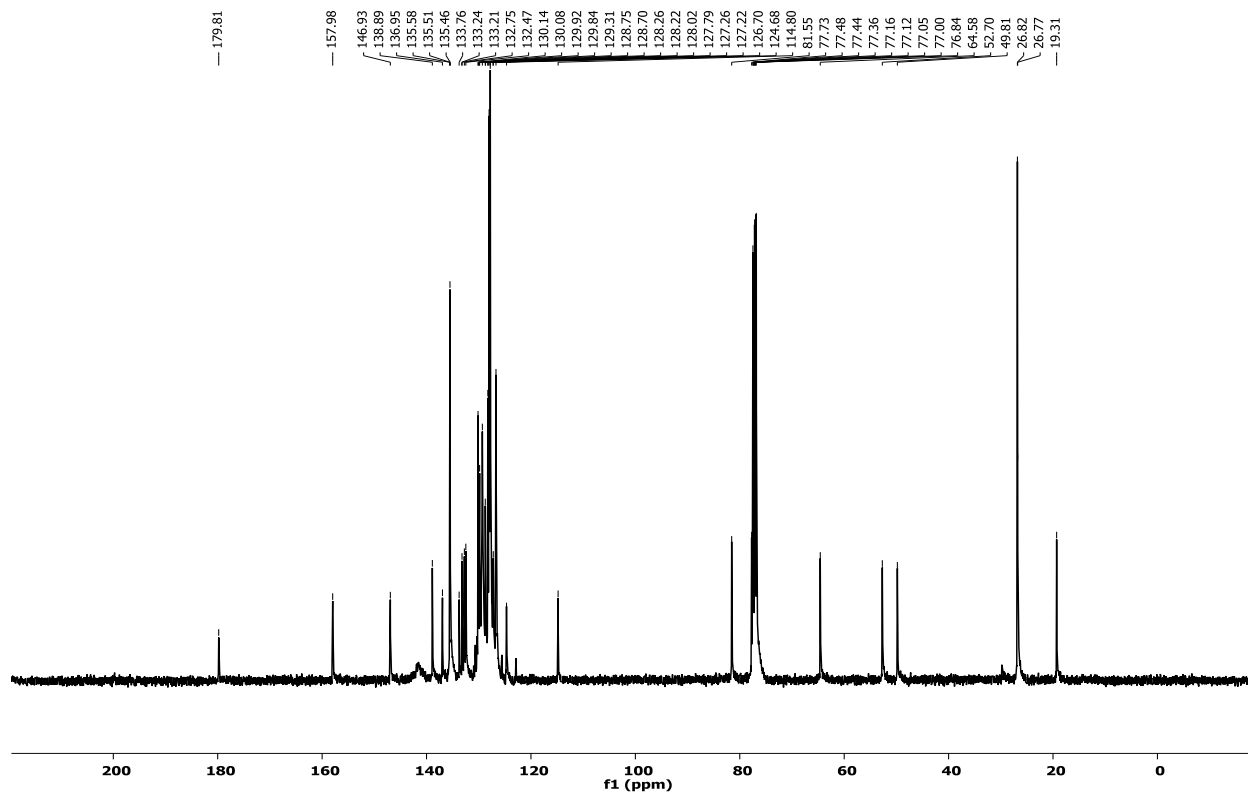



<sup>1</sup>H-NMR of compound **4f**, CDCl<sub>3</sub>, 300 MHz

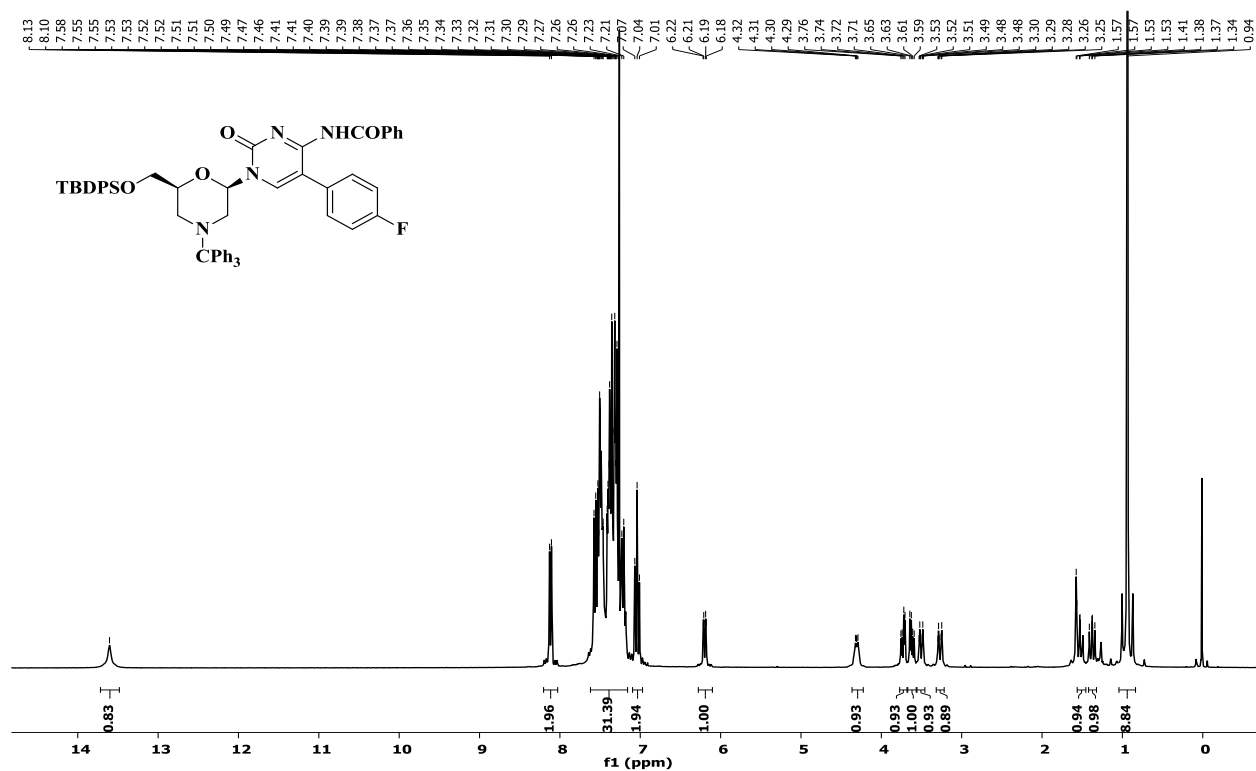

<sup>13</sup>C-NMR of compound **4f**, CDCl<sub>3</sub>, 100 MHz

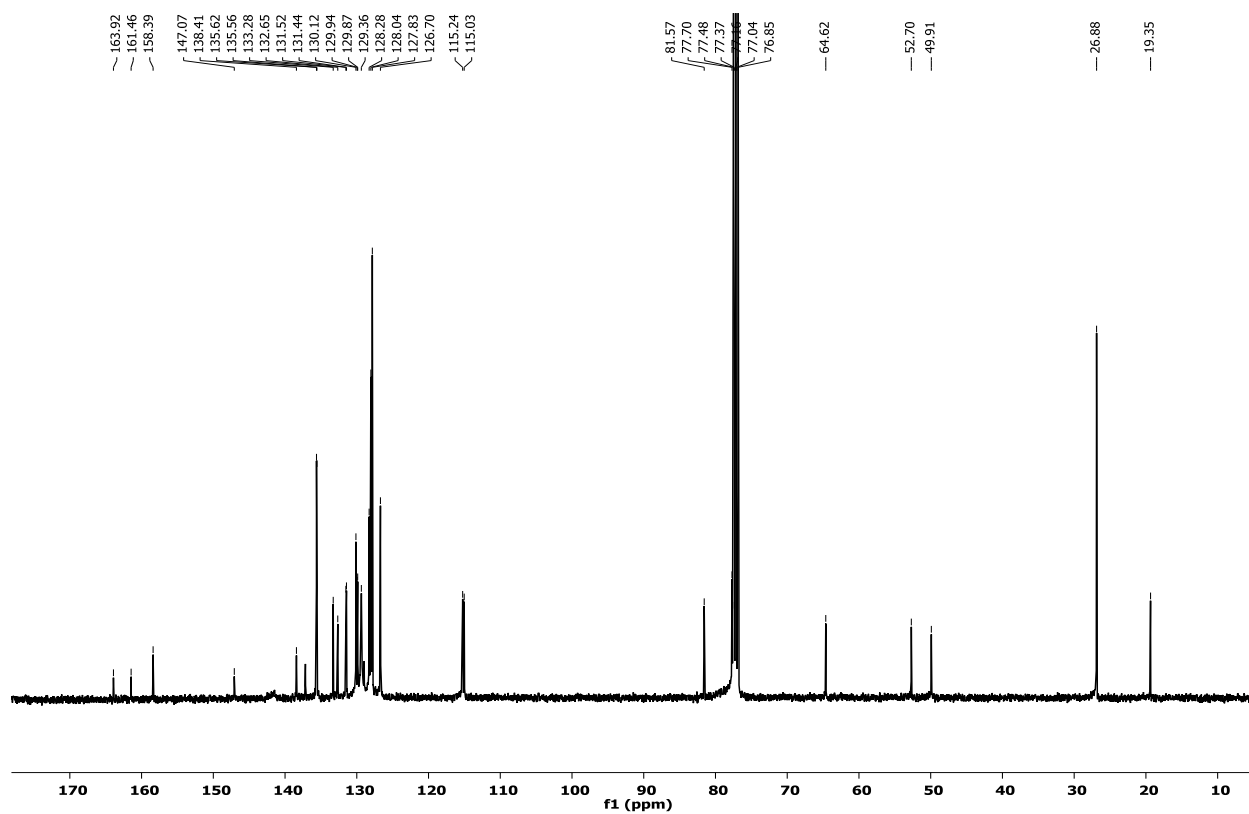

<sup>1</sup>H-NMR of compound **4g**, CDCl<sub>3</sub>, 300 MHz

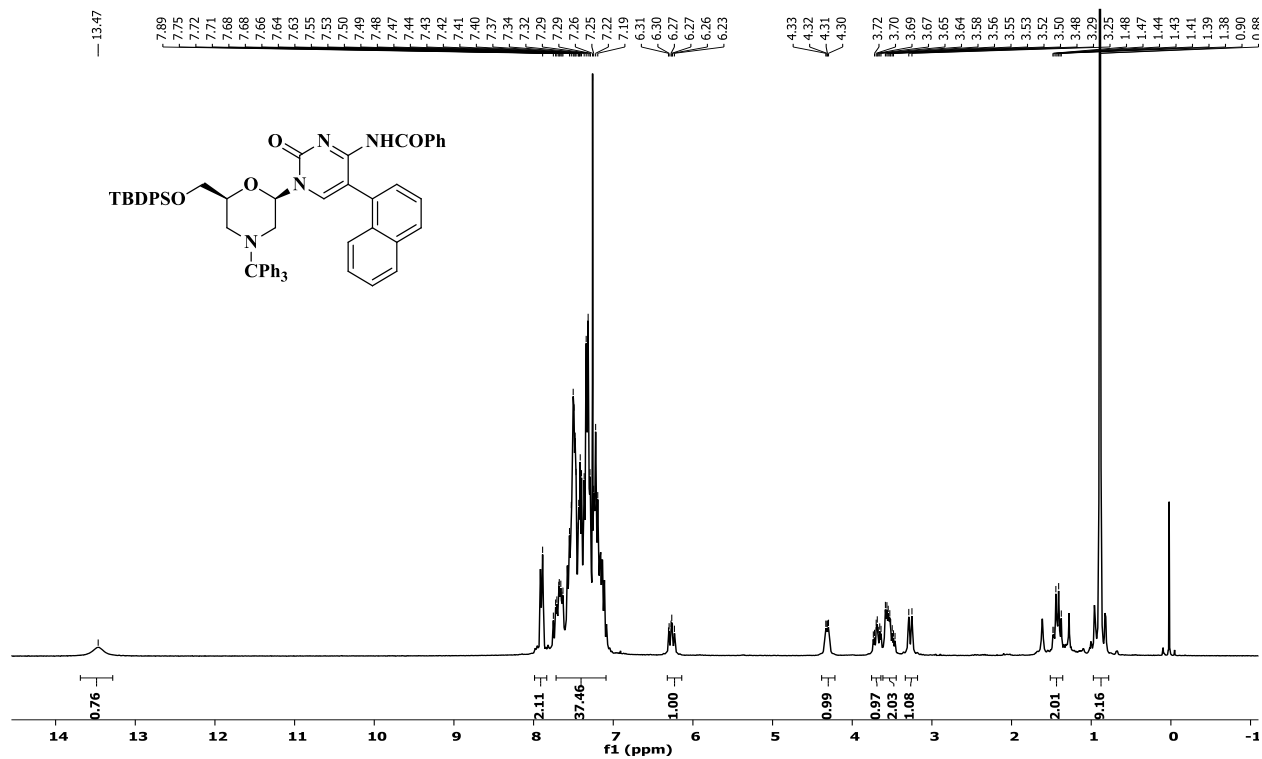

<sup>13</sup>C-NMR of compound **4g**, CDCl<sub>3</sub>, 100 MHz

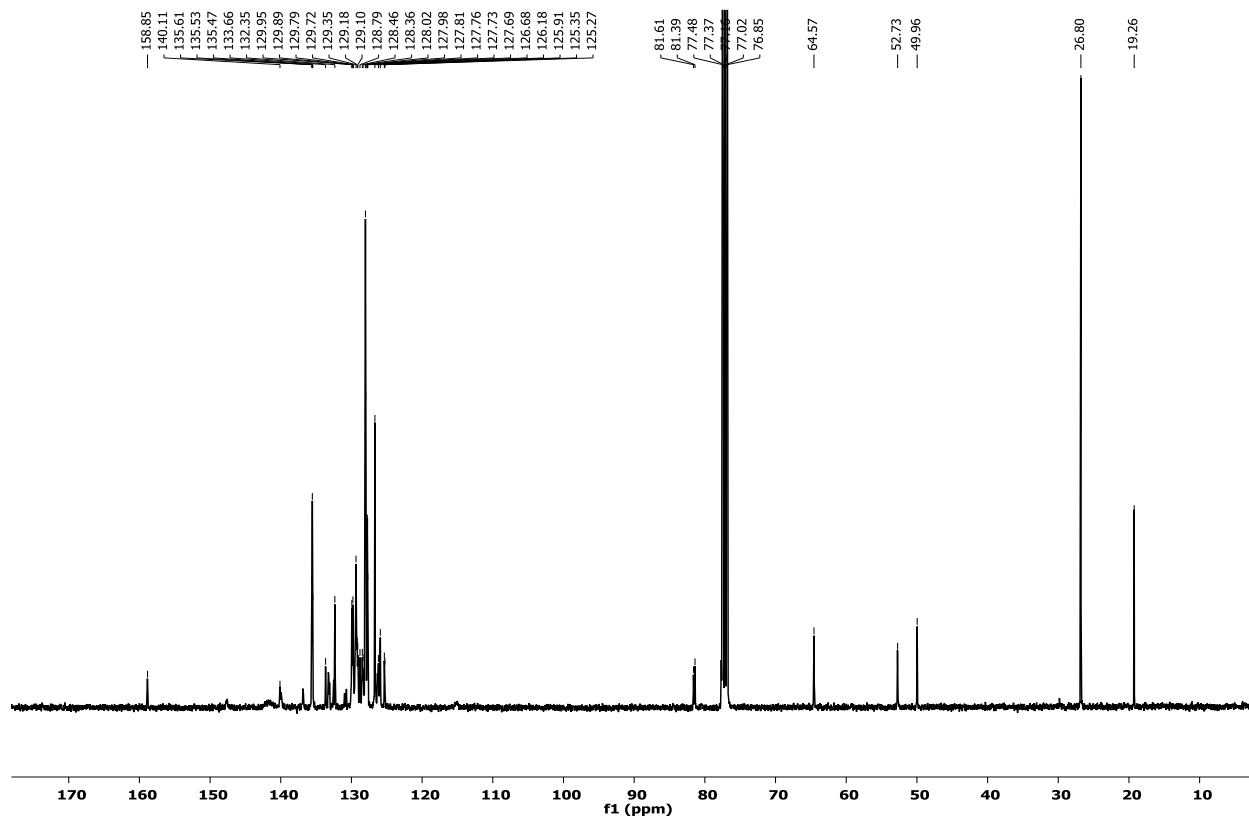

1H-NMR of compound **4h**, CDCl<sub>3</sub>, 300 MHz

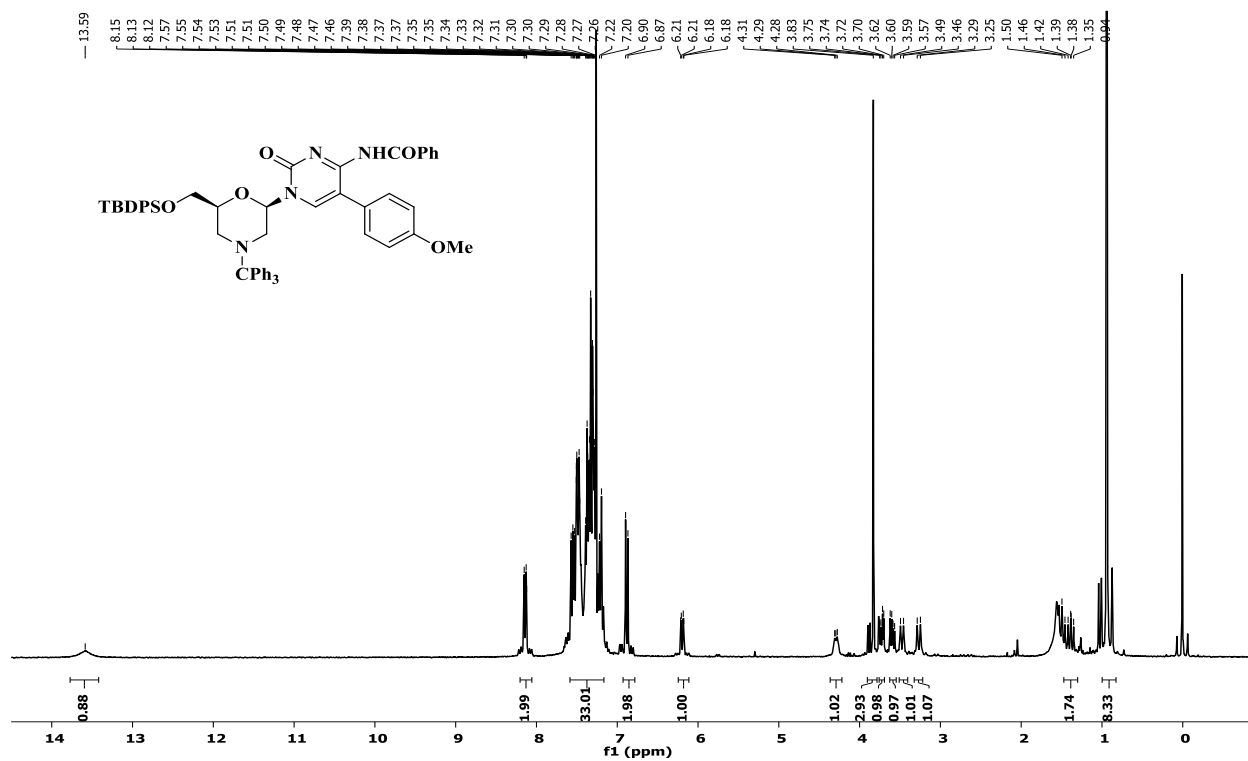

1H-NMR of compound **4h**, CDCl<sub>3</sub>, 100 MHz

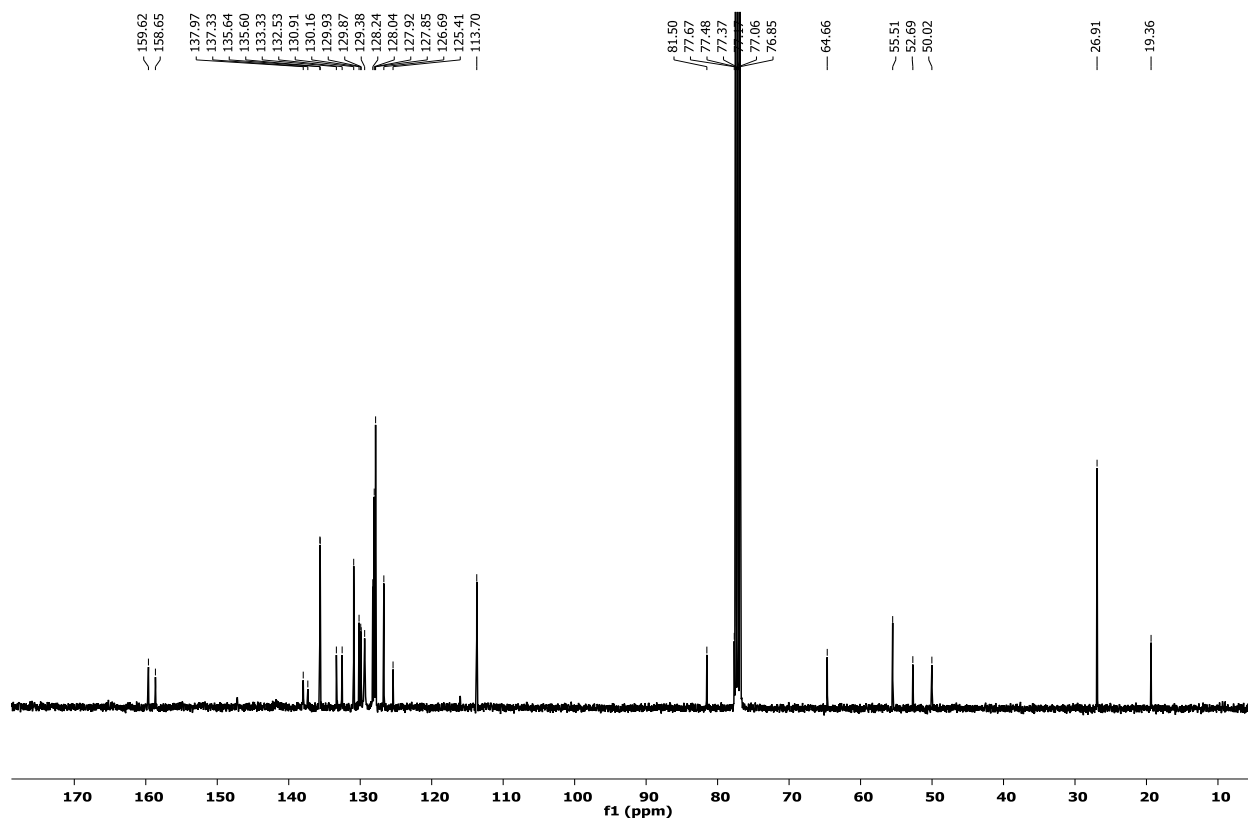

1H-NMR of compound **4i**, CDCl<sub>3</sub>, 300 MHz

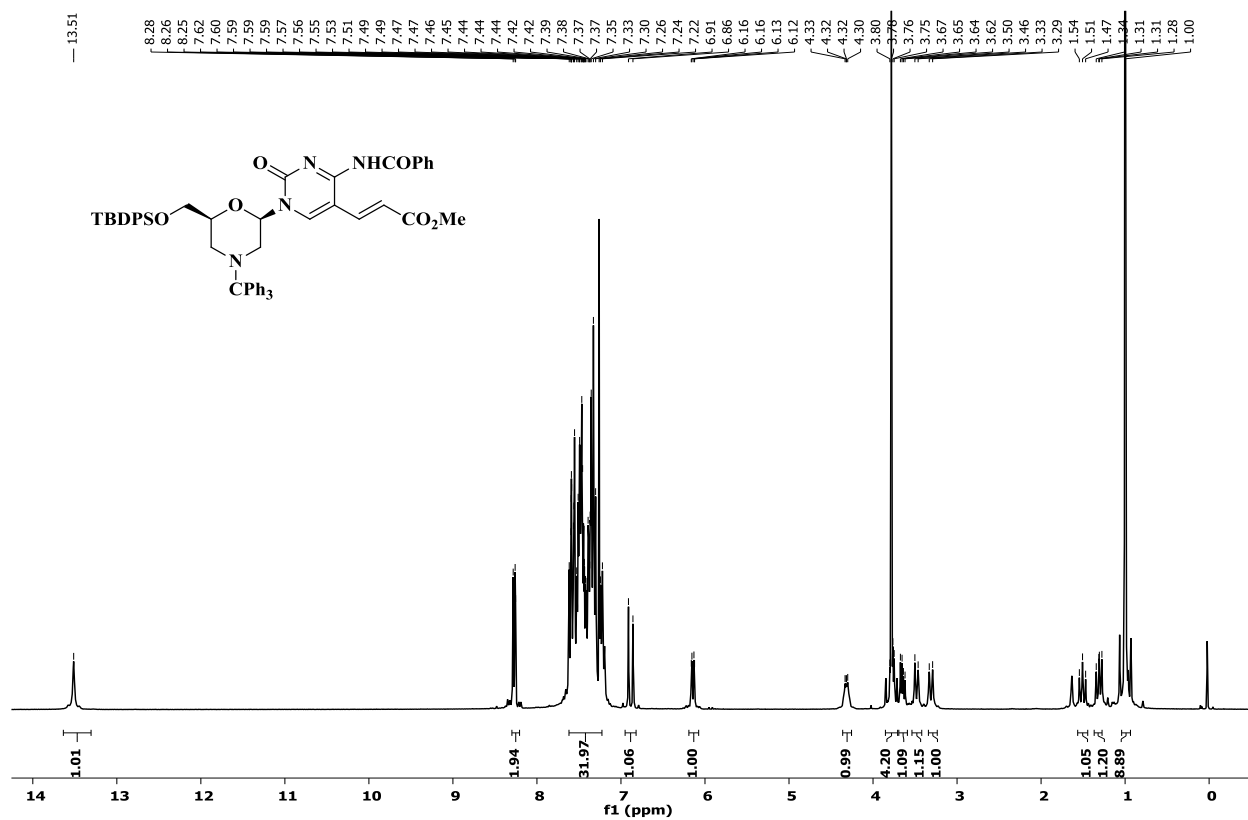

13C-NMR of compound **4i**, CDCl<sub>3</sub>, 100 MHz

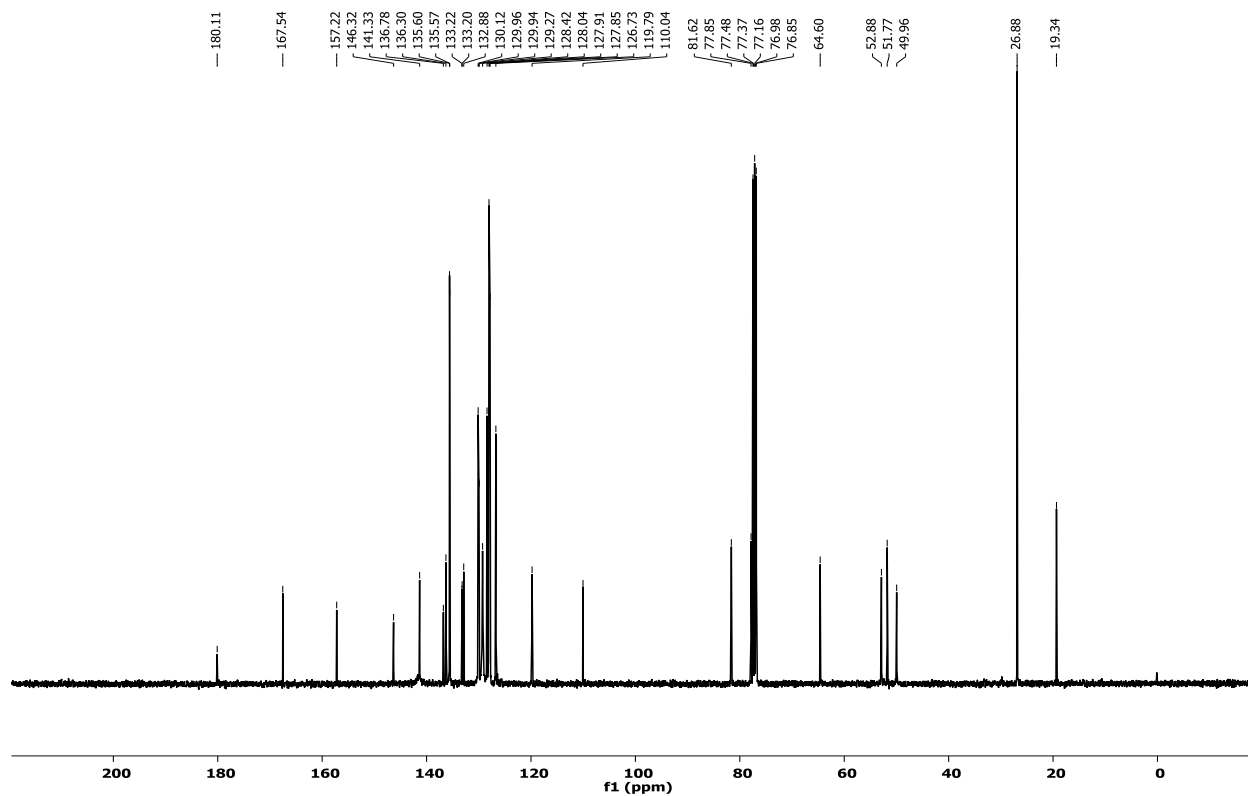

<sup>1</sup>H-NMR of compound **4j**, CDCl<sub>3</sub>, 300 MHz

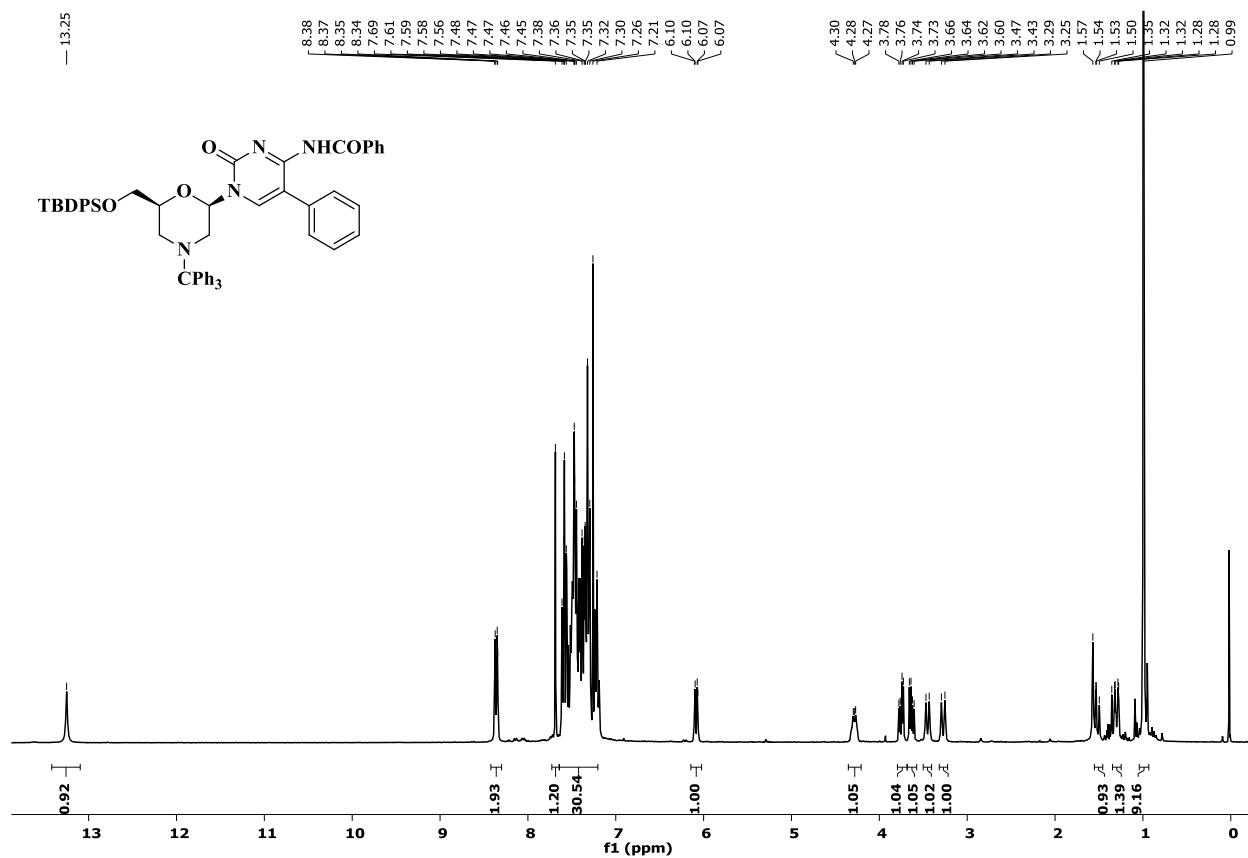

<sup>13</sup>C-NMR of compound **4j**, CDCl<sub>3</sub>, 100 MHz

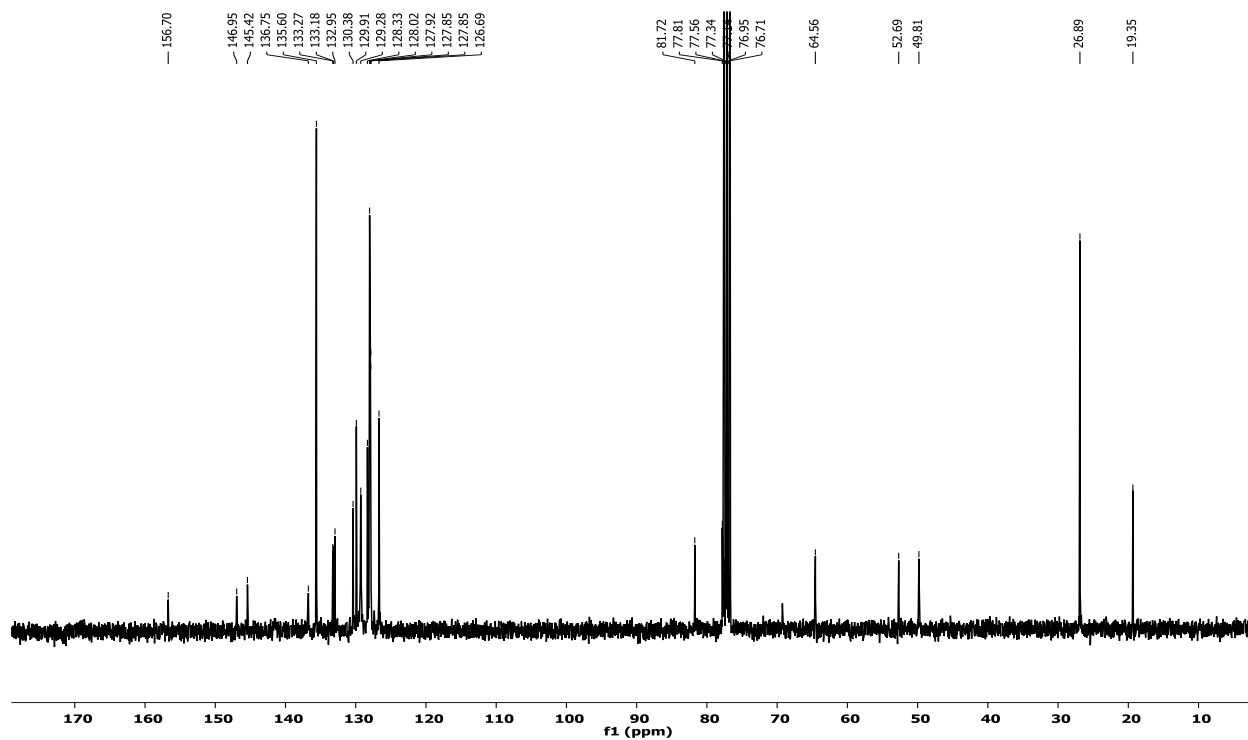

<sup>1</sup>H-NMR of compound **4k**, CDCl<sub>3</sub>, 300 MHz

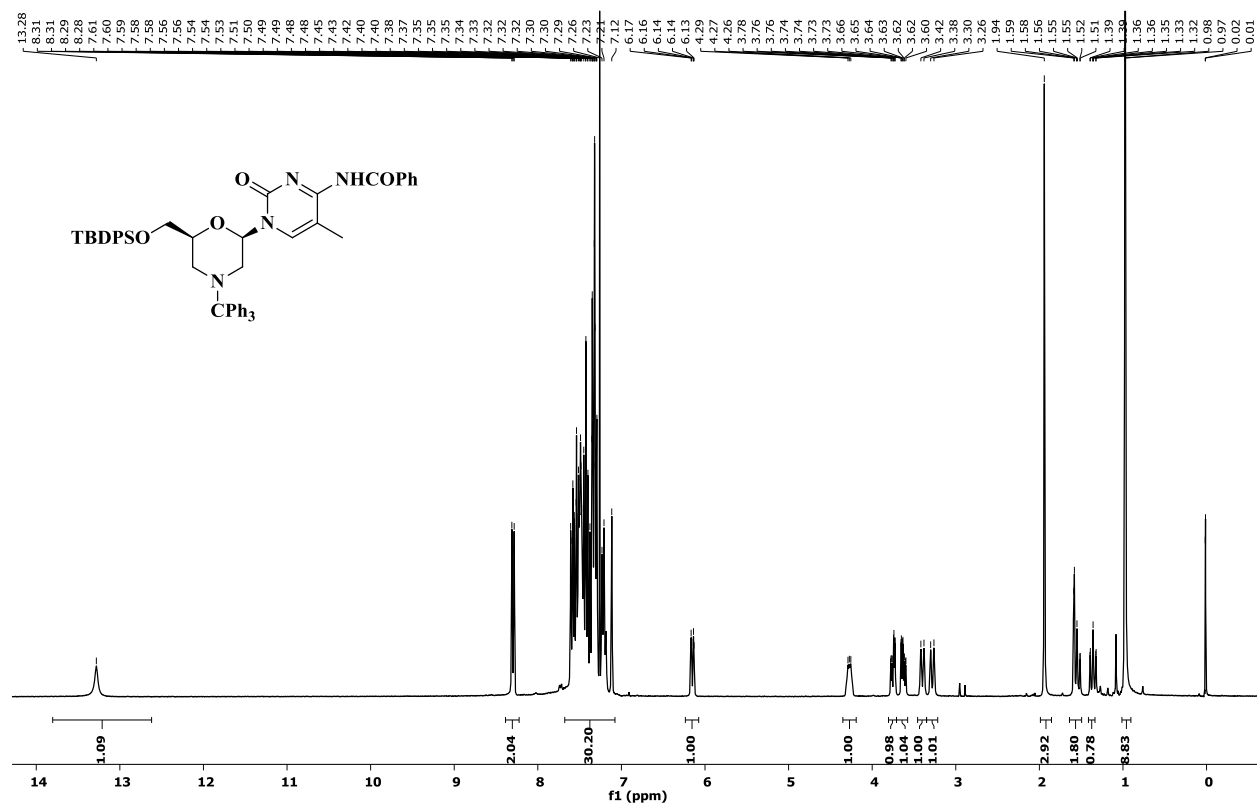

<sup>13</sup>C-NMR of compound **4k**, CDCl<sub>3</sub>, 100 MHz

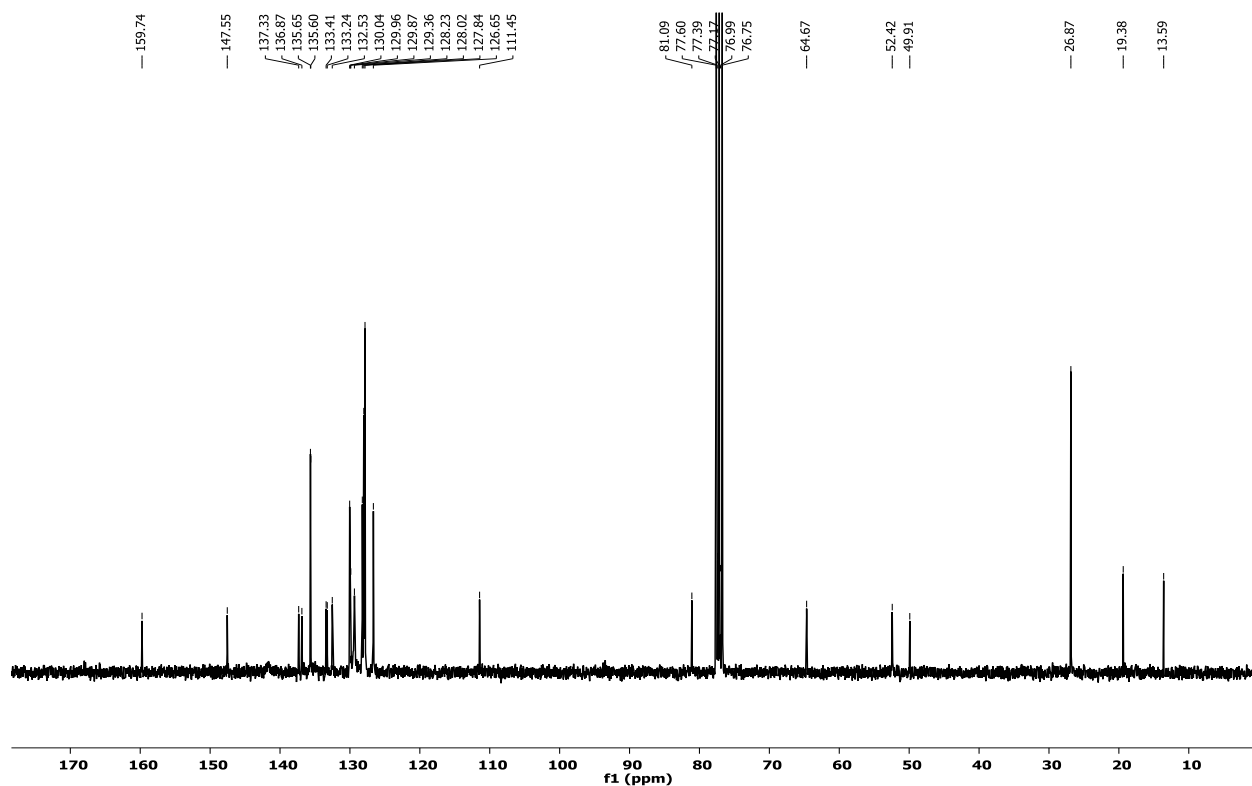

<sup>1</sup>H-NMR of compound **41**, CDCl<sub>3</sub>, 300 MHz

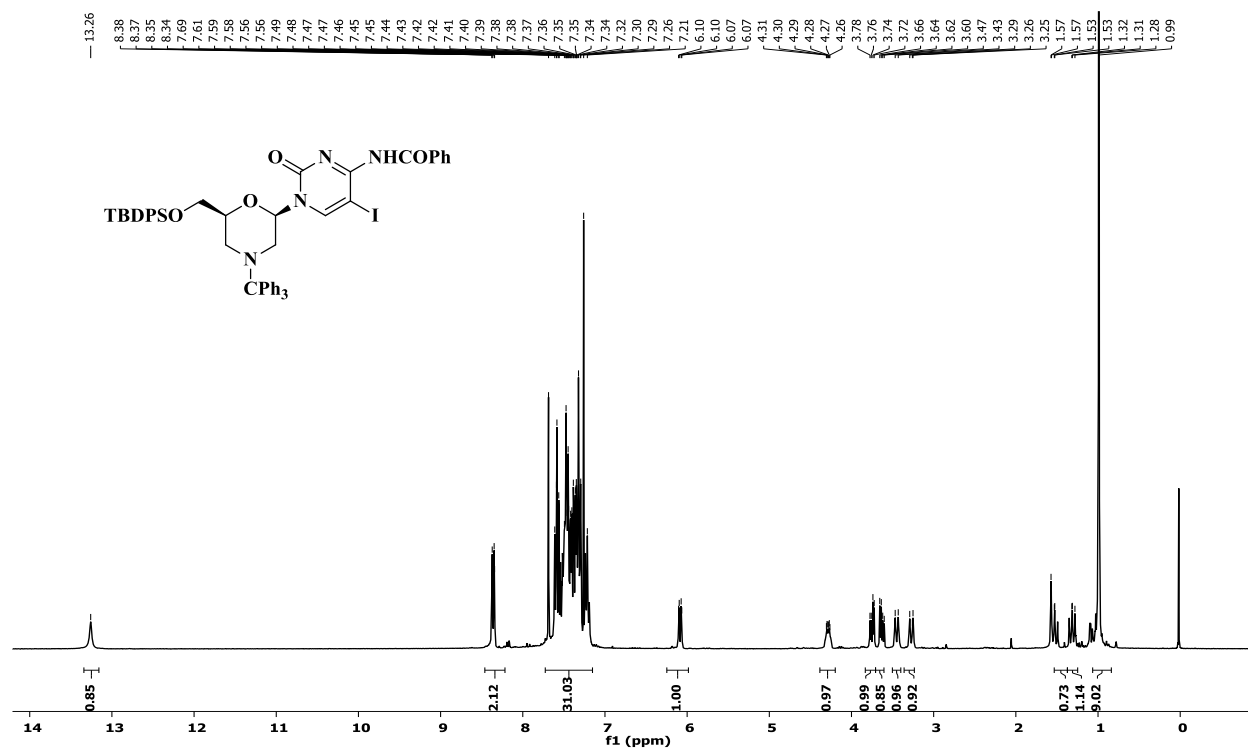

<sup>13</sup>C-NMR of compound **41**, CDCl<sub>3</sub>, 100 MHz

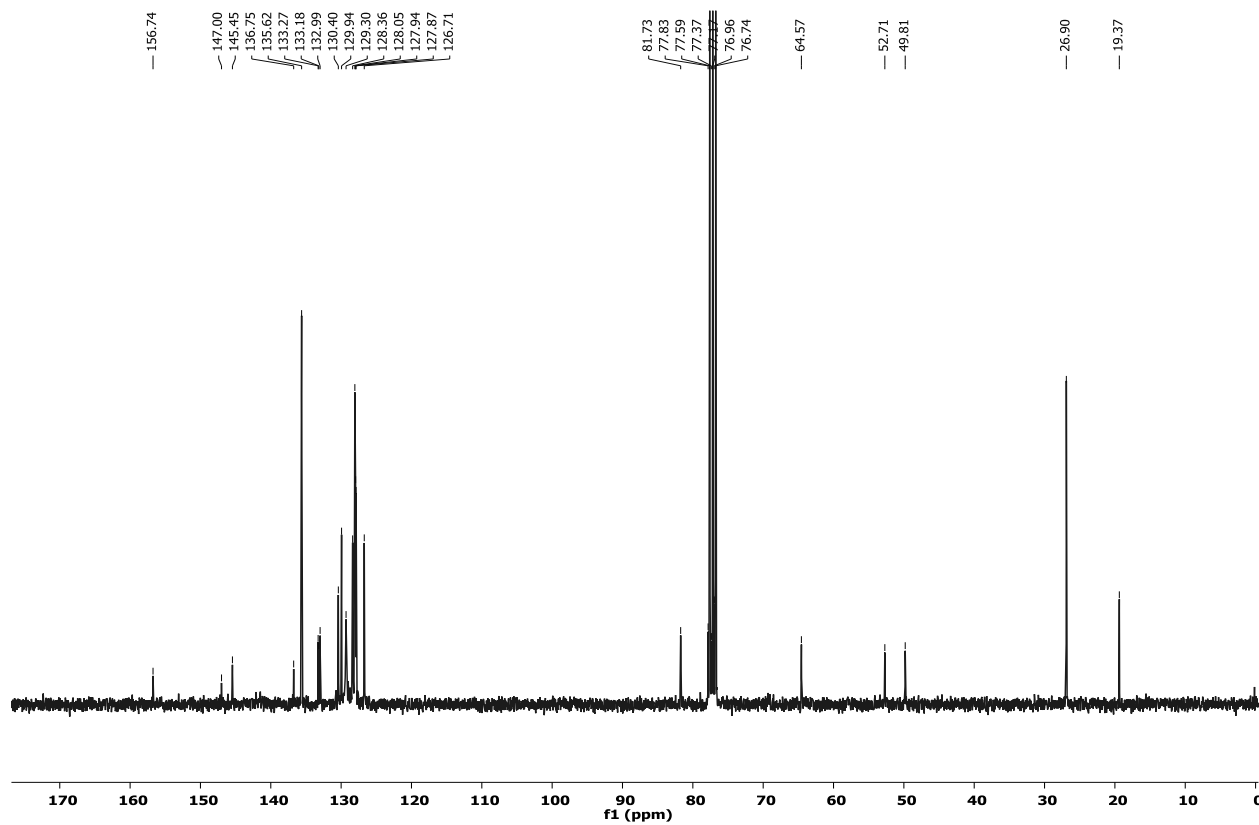

<sup>1</sup>H-NMR of compound **5a**, CDCl<sub>3</sub>, 300 MHz

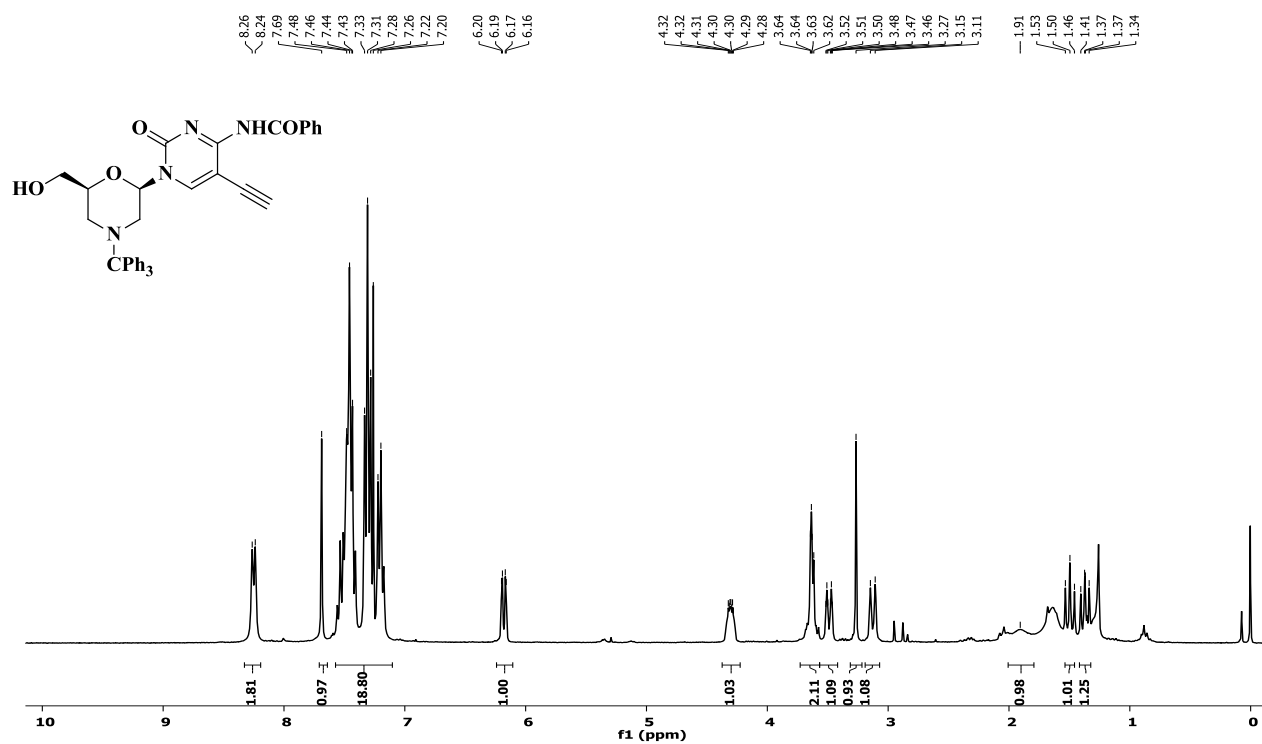

<sup>13</sup>C-NMR of compound **5a**, CDCl<sub>3</sub>, 100 MHz

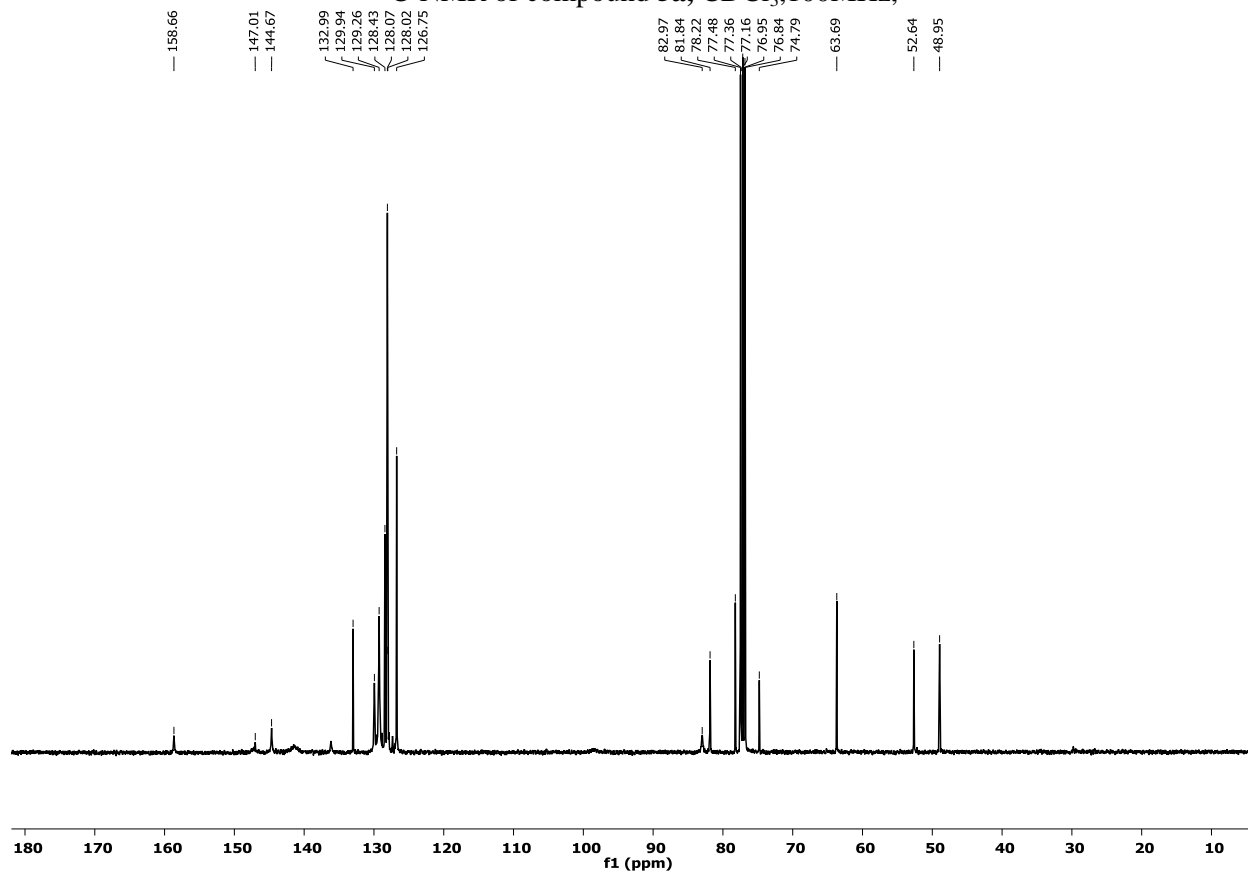



<sup>1</sup>H-NMR of compound **5b**, CDCl<sub>3</sub>, 300 MHz

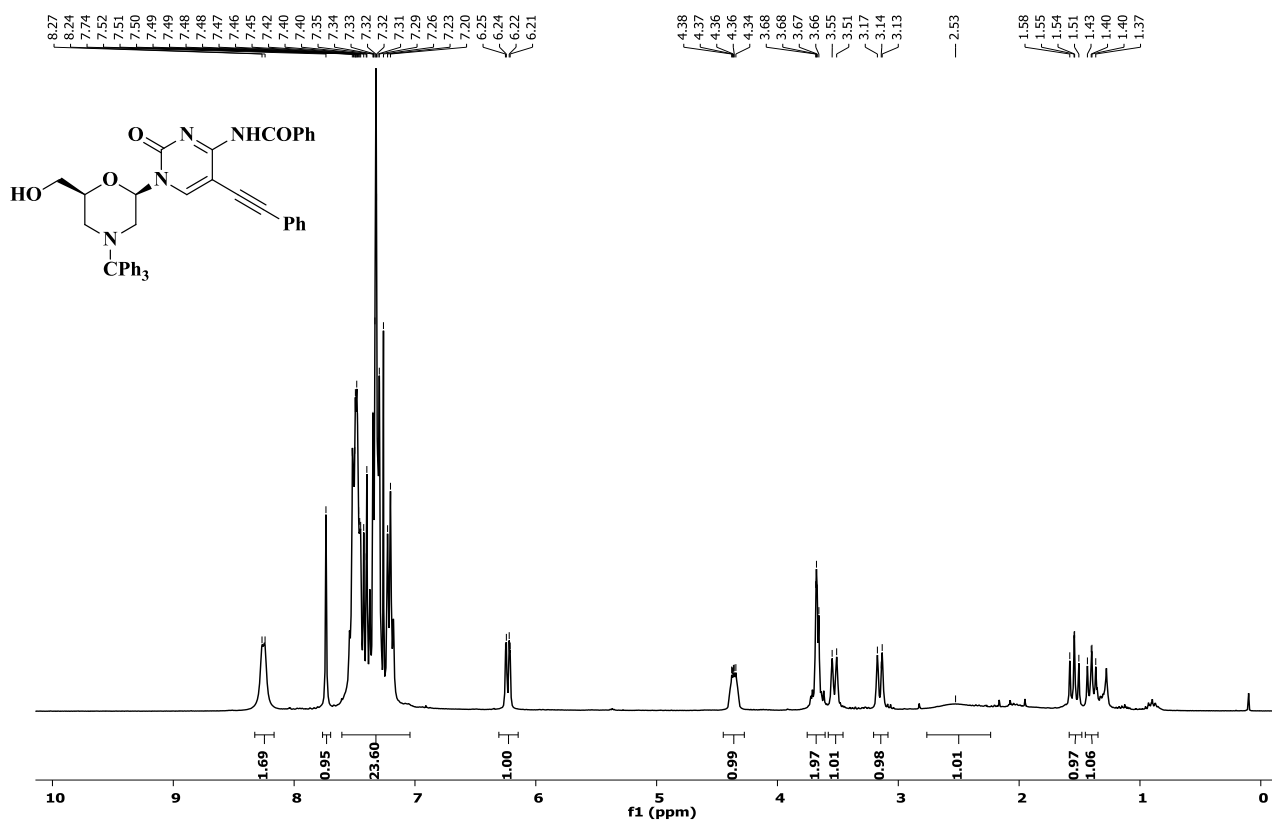

<sup>13</sup>C-NMR of compound **5b**, CDCl<sub>3</sub>, 75 MHz

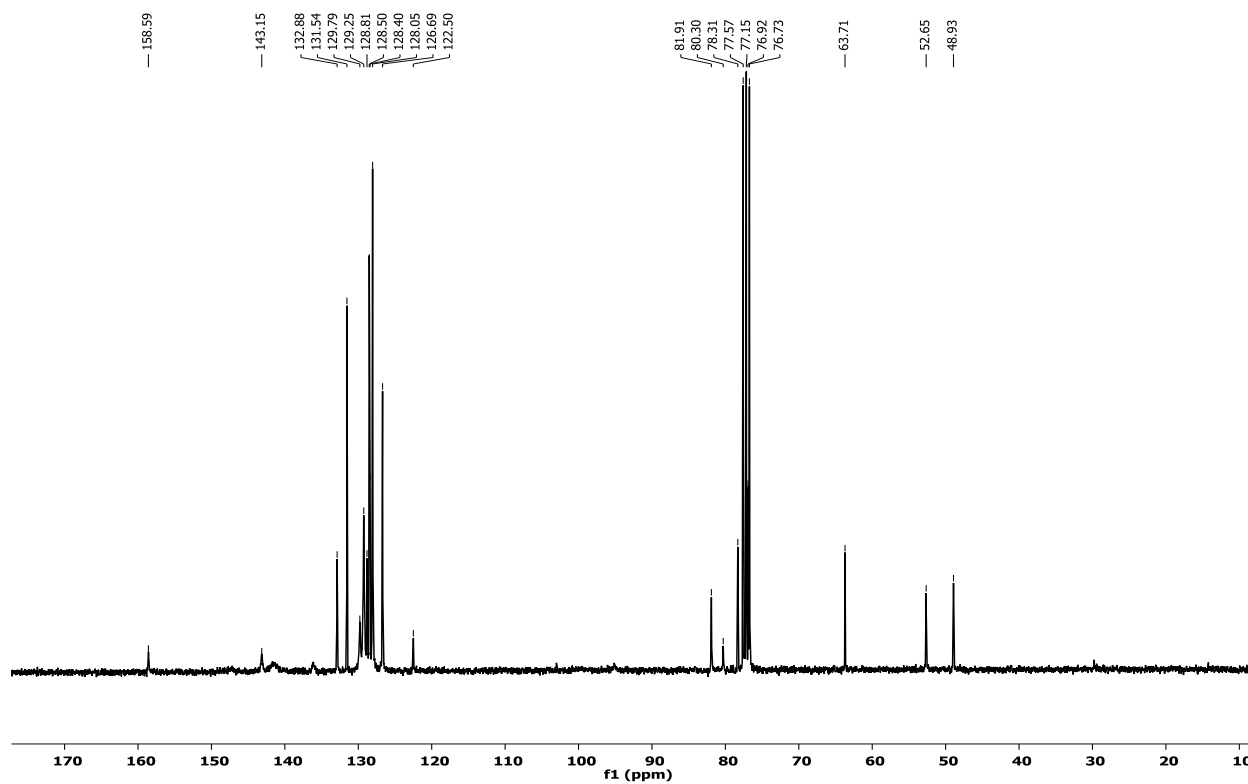

1H-NMR of compound 5c, CDCl<sub>3</sub>, 300 MHz

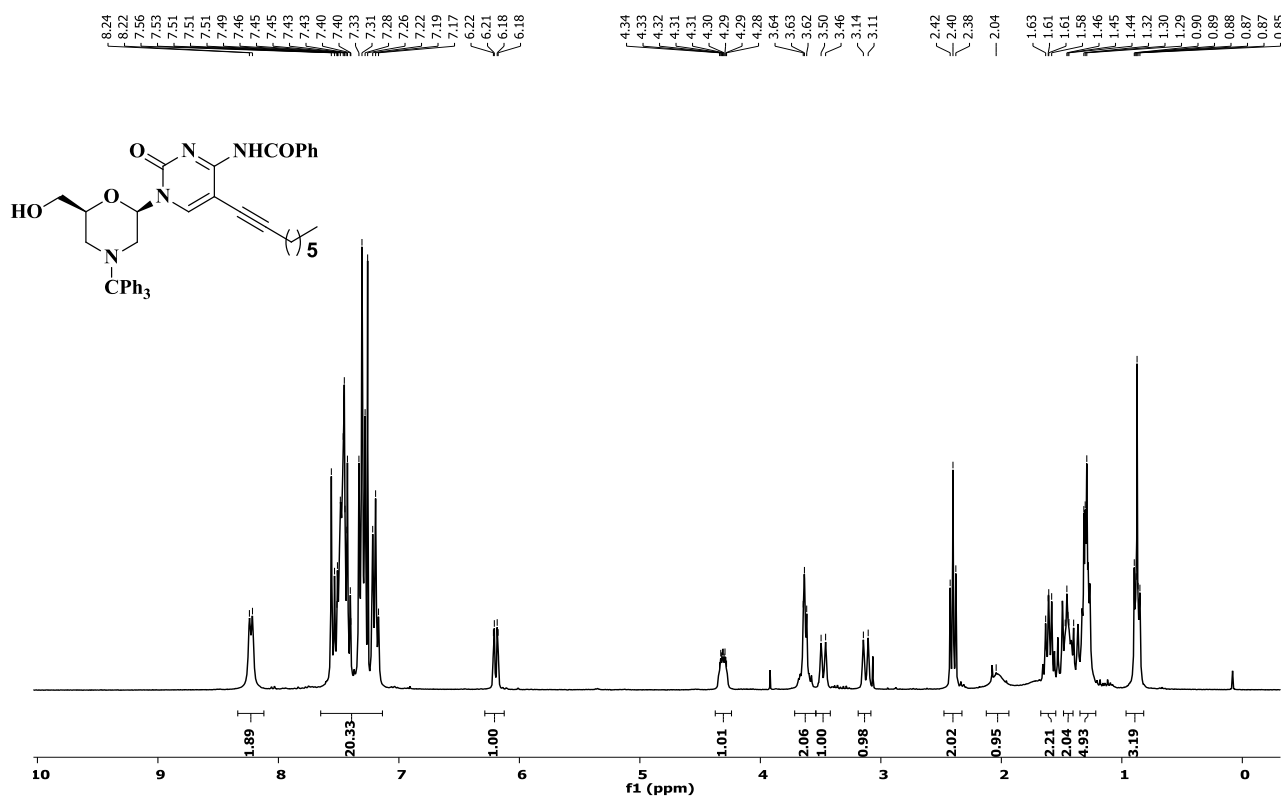

1H-NMR of compound 5c, CDCl<sub>3</sub>, 100 MHz

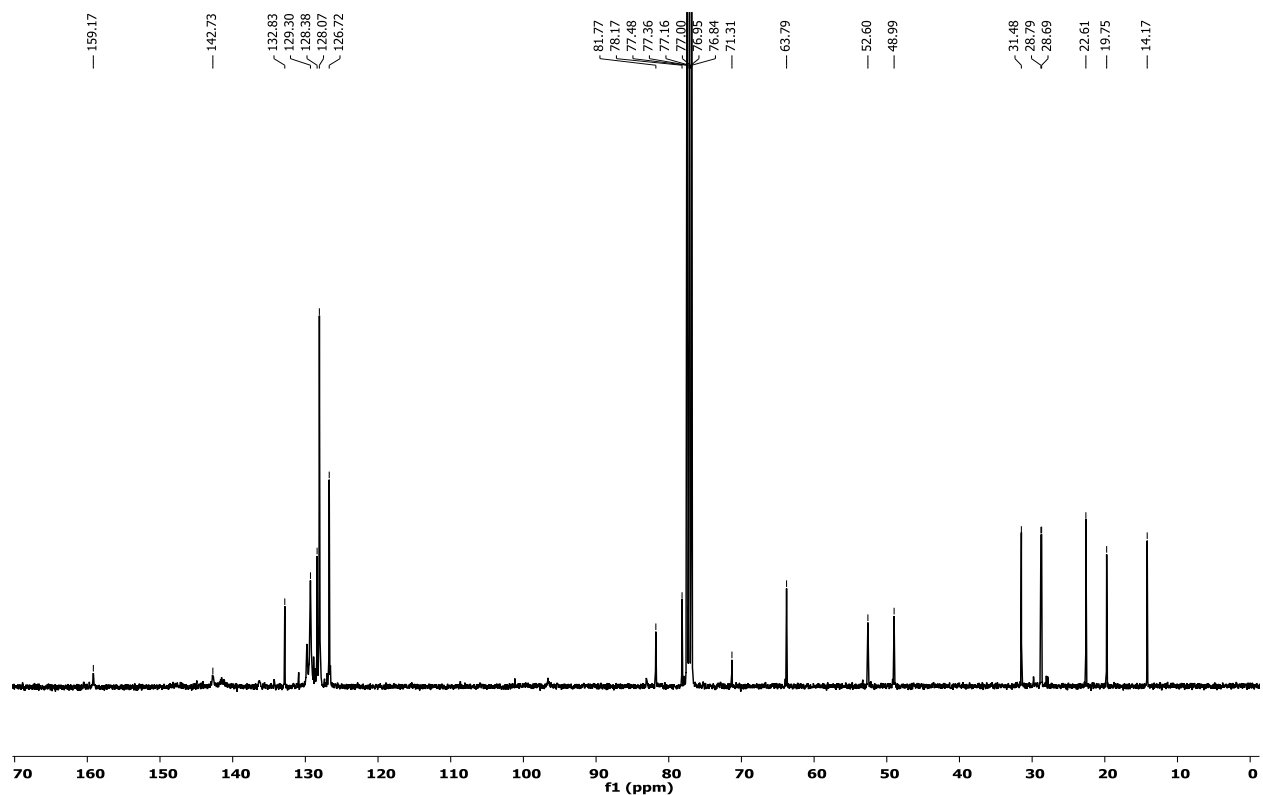

1H-NMR of compound **5d**, CDCl<sub>3</sub>, 300 MHz

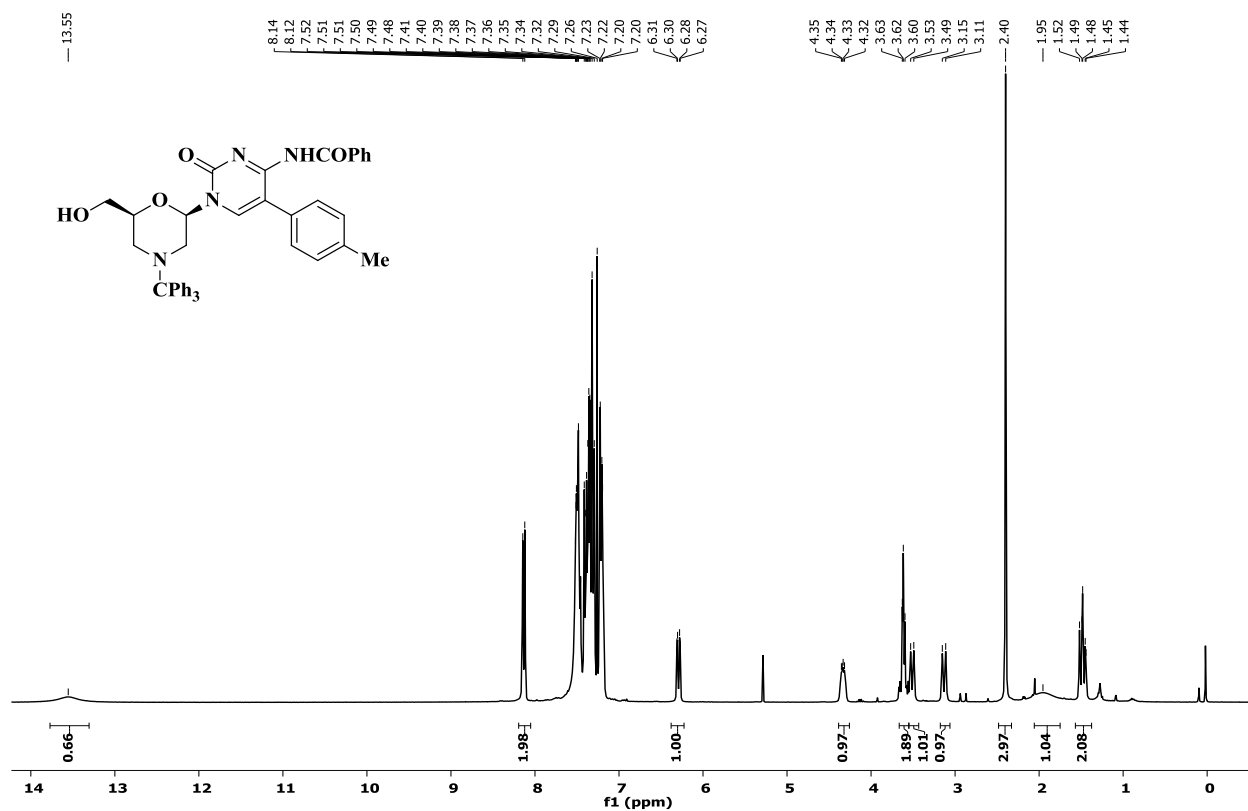

13C-NMR of compound **5d**, CDCl<sub>3</sub>, 100 MHz

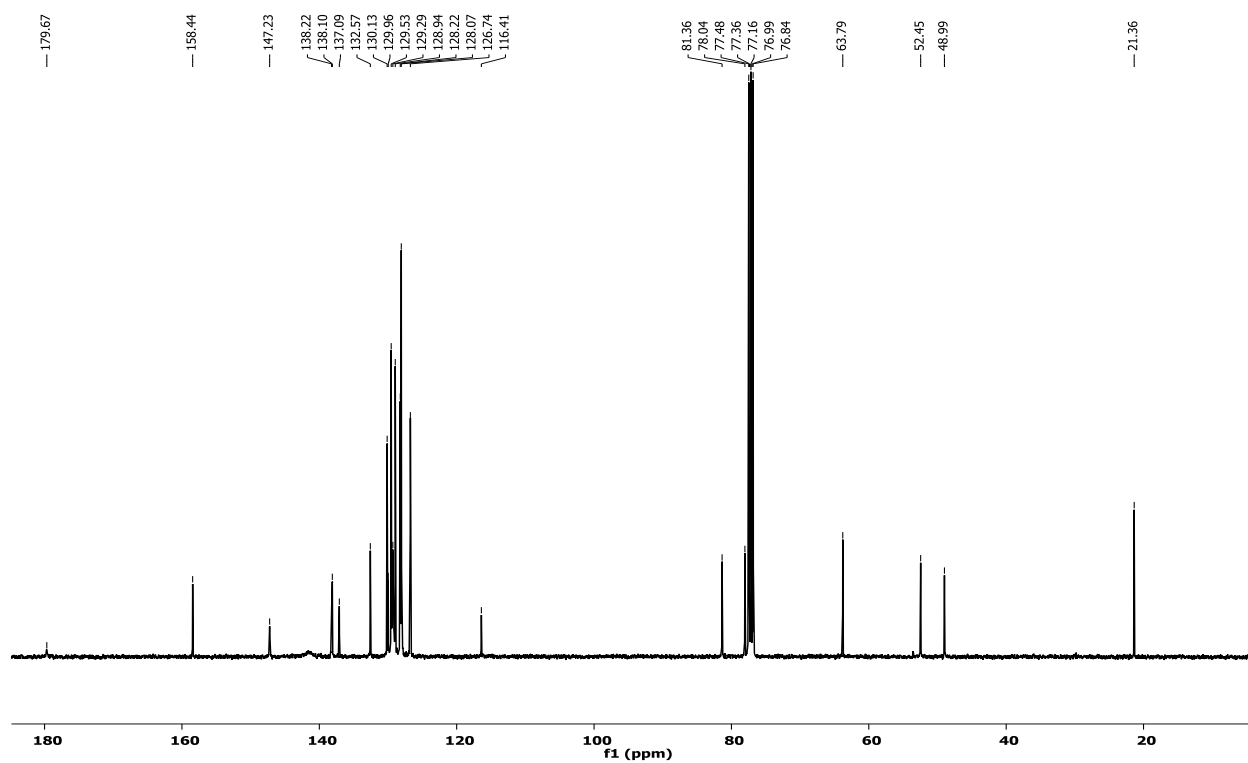

<sup>1</sup>H-NMR of compound **5e**, CDCl<sub>3</sub>, 300 MHz

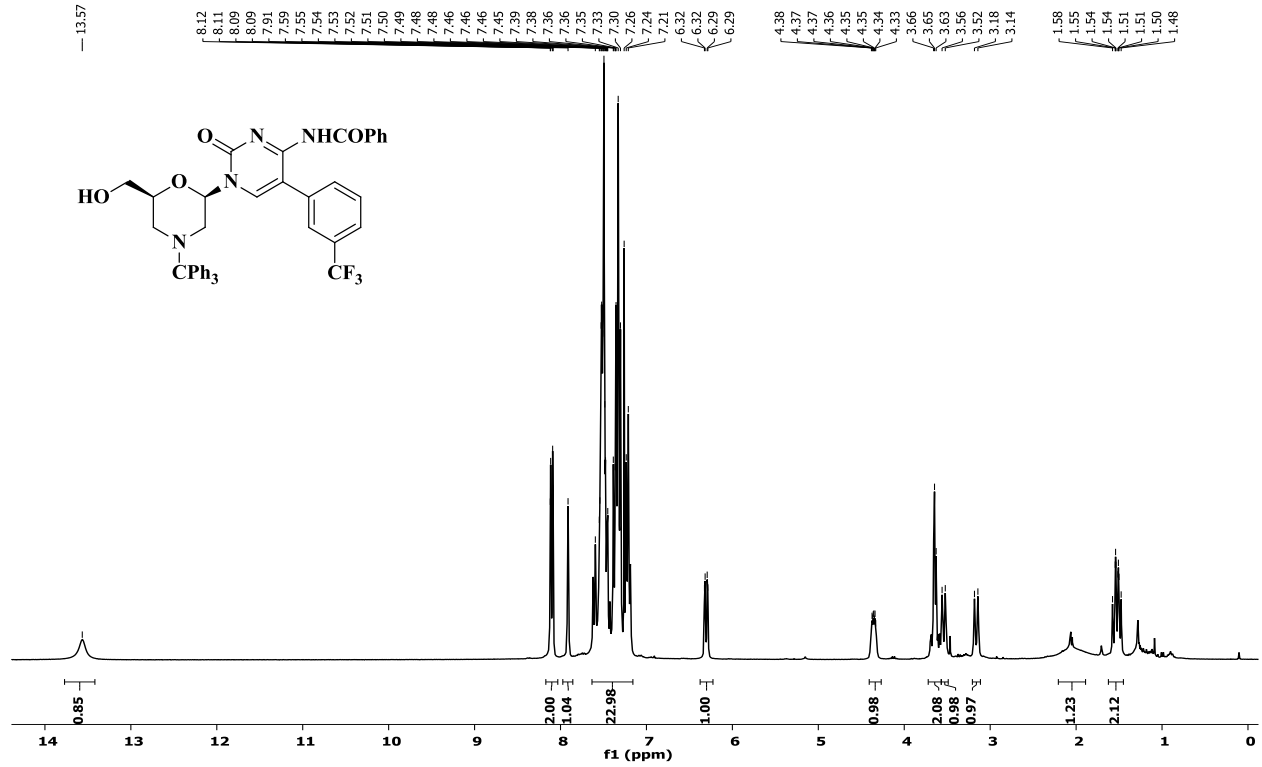

<sup>13</sup>C-NMR of compound **5e**, CDCl<sub>3</sub>, 100 MHz

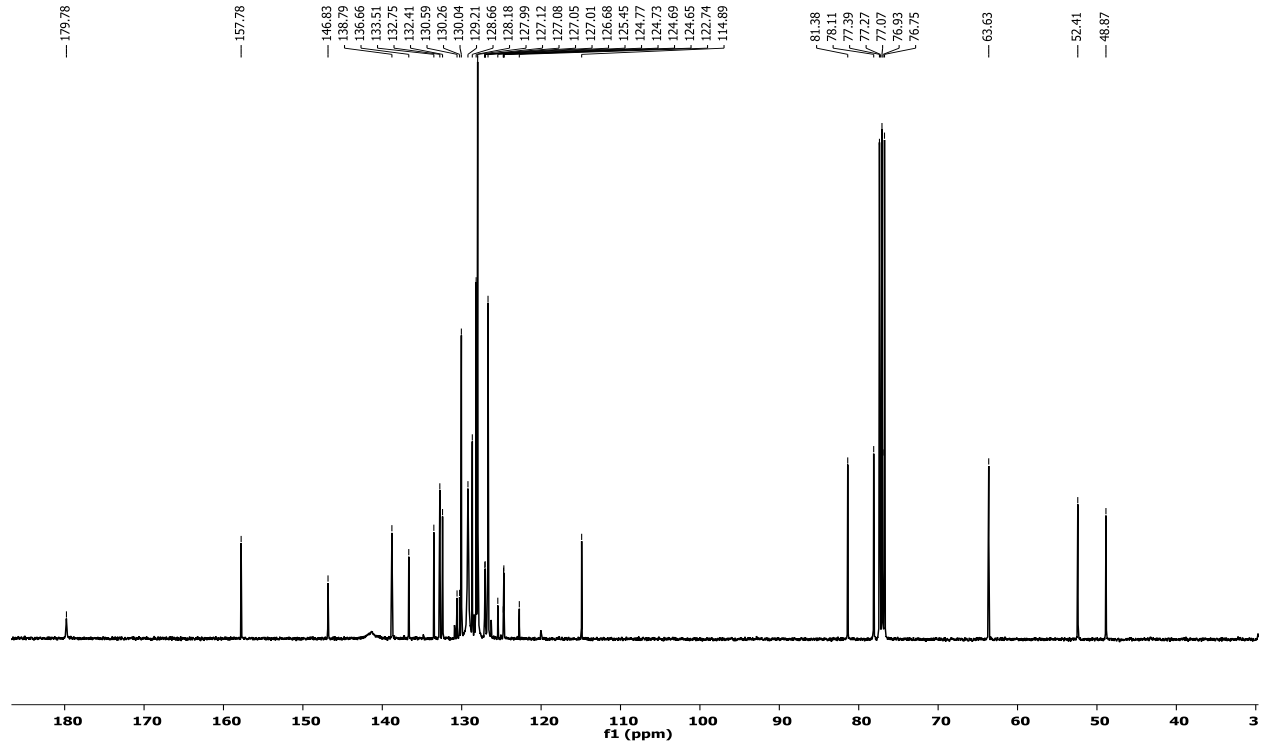

<sup>1</sup>H-NMR of compound **5f**, CDCl<sub>3</sub>, 300 MHz

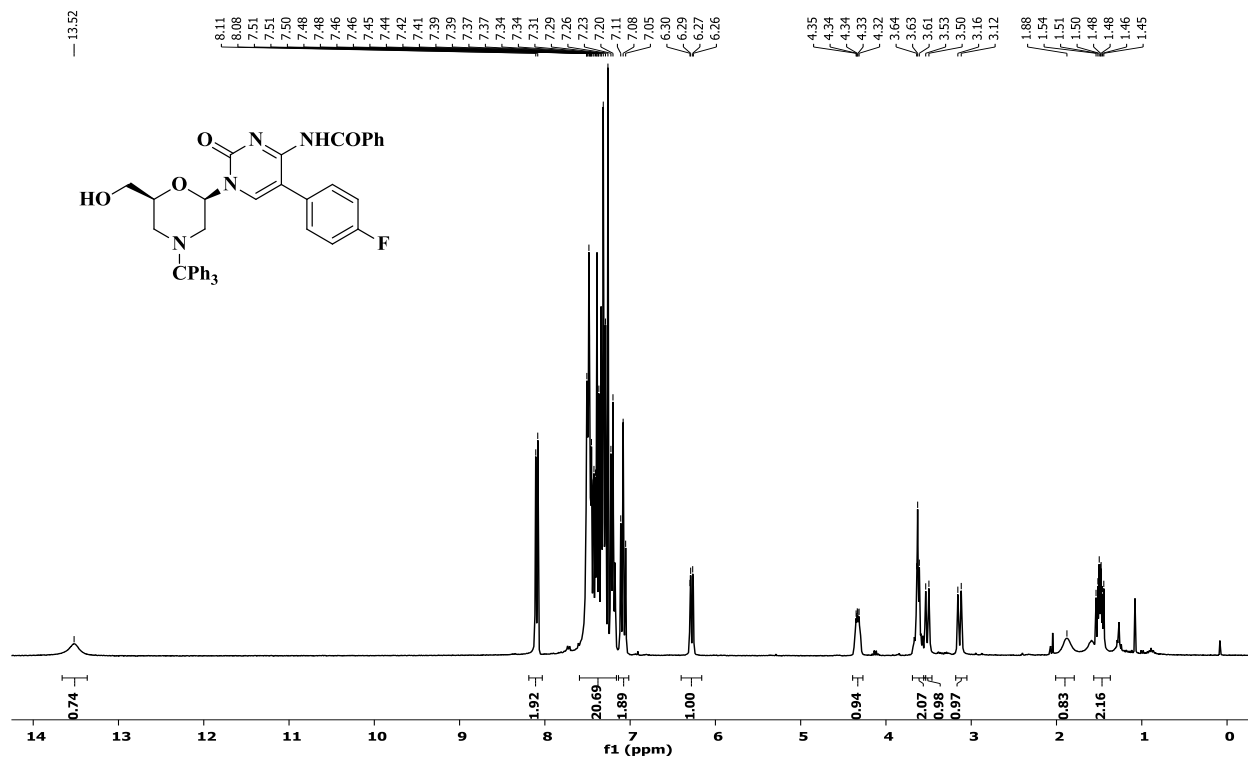

<sup>13</sup>C-NMR of compound **5f**, CDCl<sub>3</sub>, 100 MHz

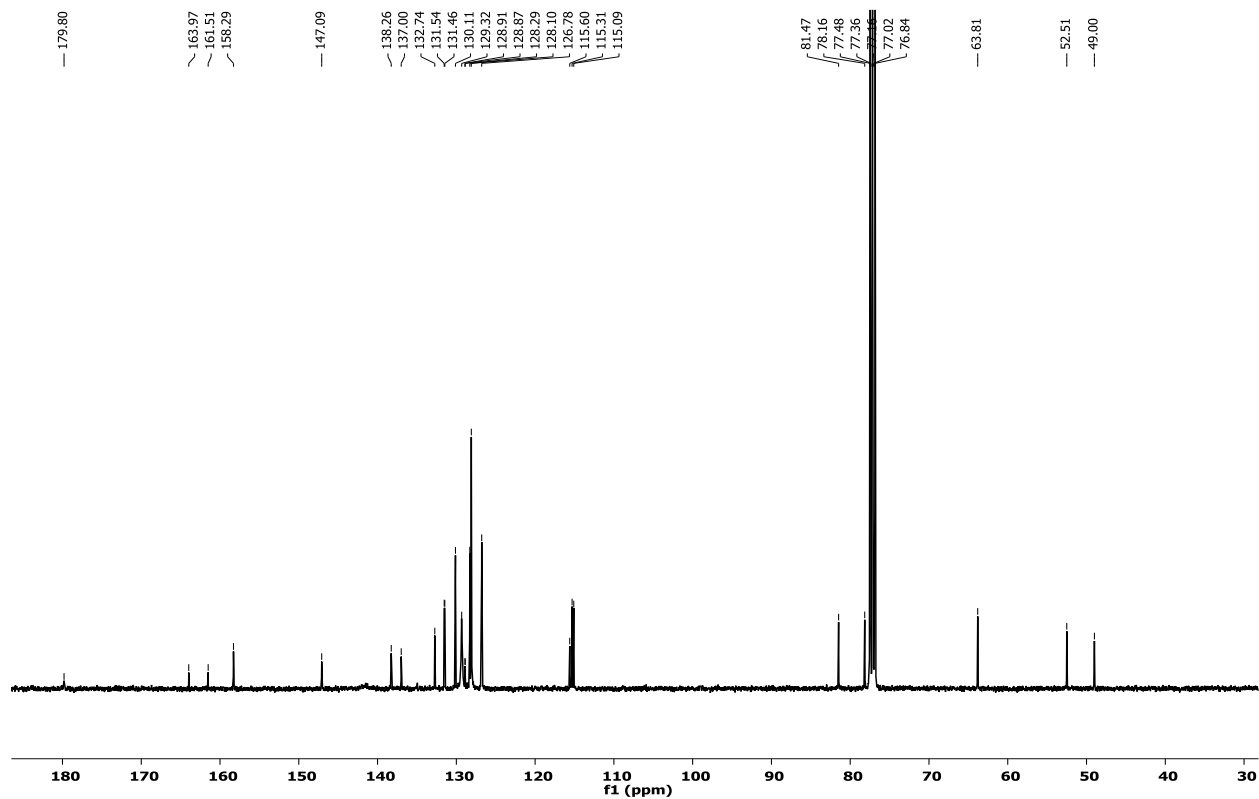

1H-NMR of compound **5g**, CDCl<sub>3</sub>, 300 MHz

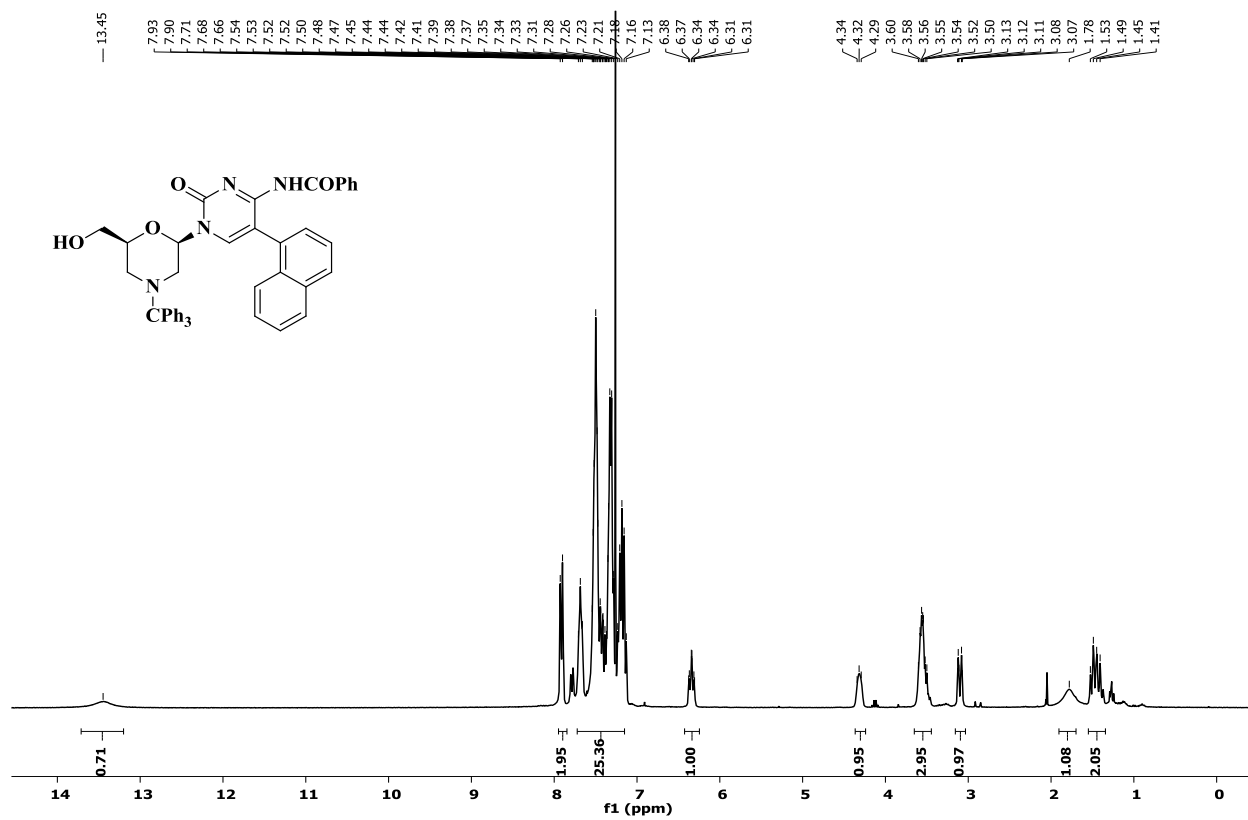

1H-NMR of compound **5g**, CDCl<sub>3</sub>, 100 MHz

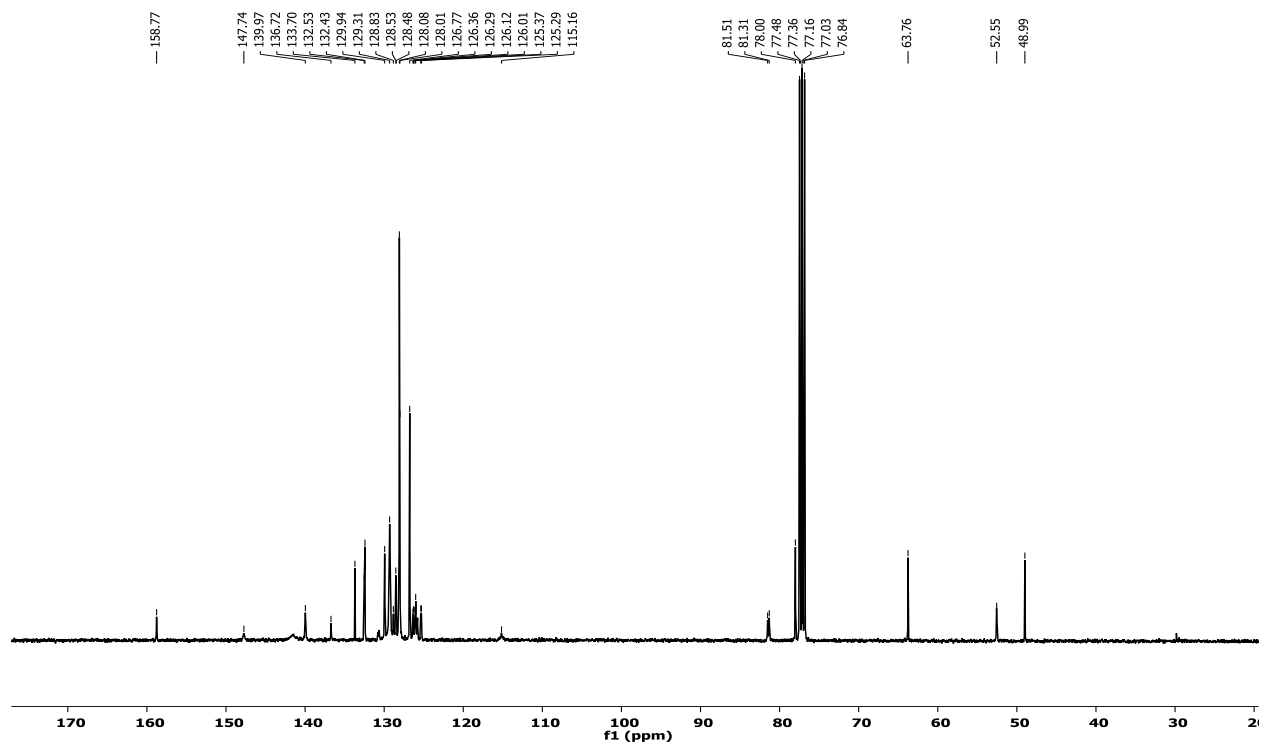

1H-NMR of compound **5h**, CDCl<sub>3</sub>, 300 MHz

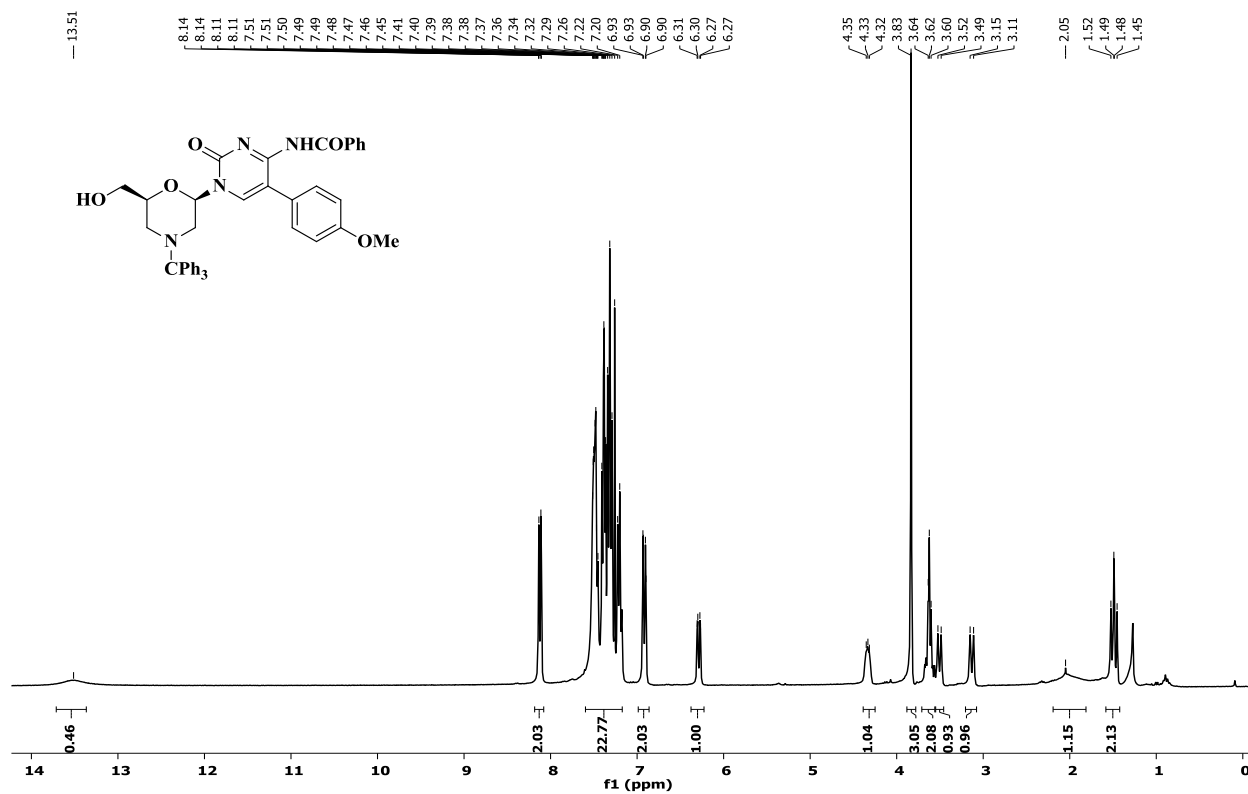

13C-NMR of compound **5h**, CDCl<sub>3</sub>, 100 MHz

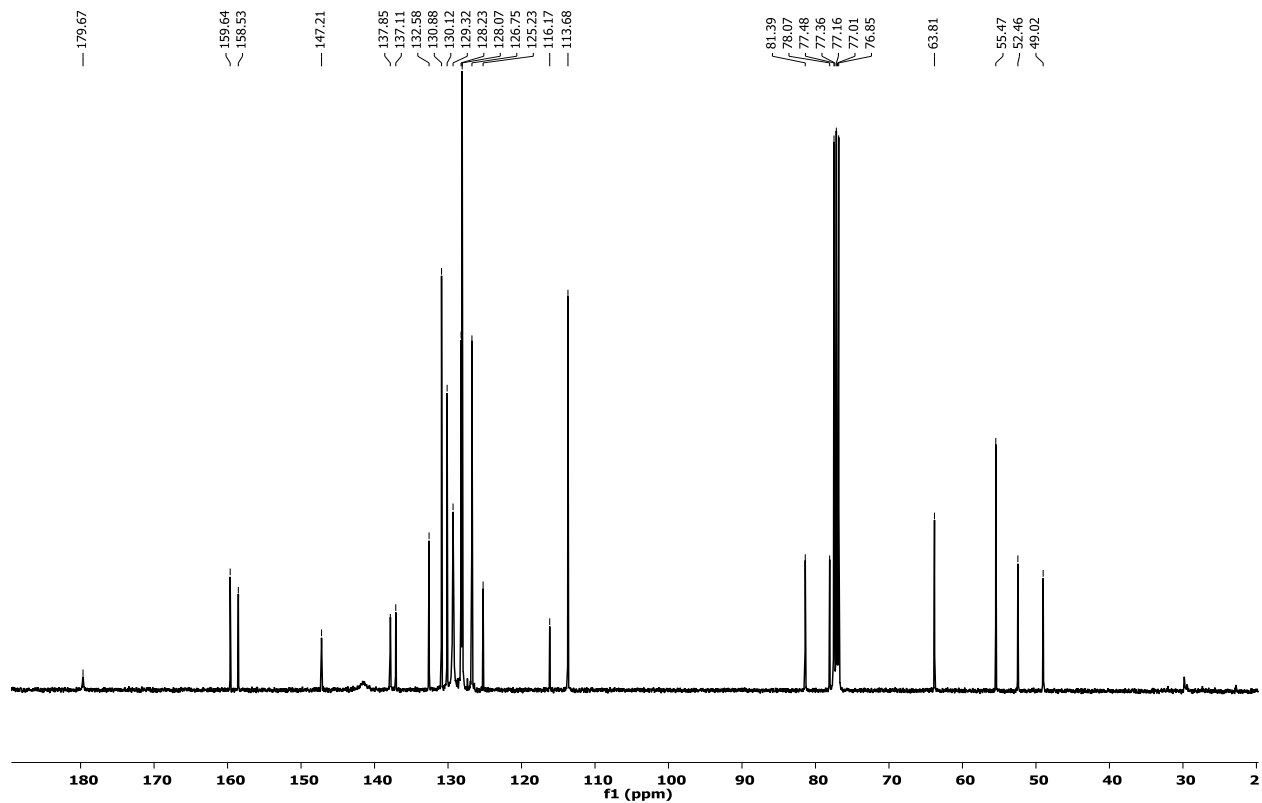

<sup>1</sup>H-NMR of compound **5i**, CDCl<sub>3</sub>, 300 MHz

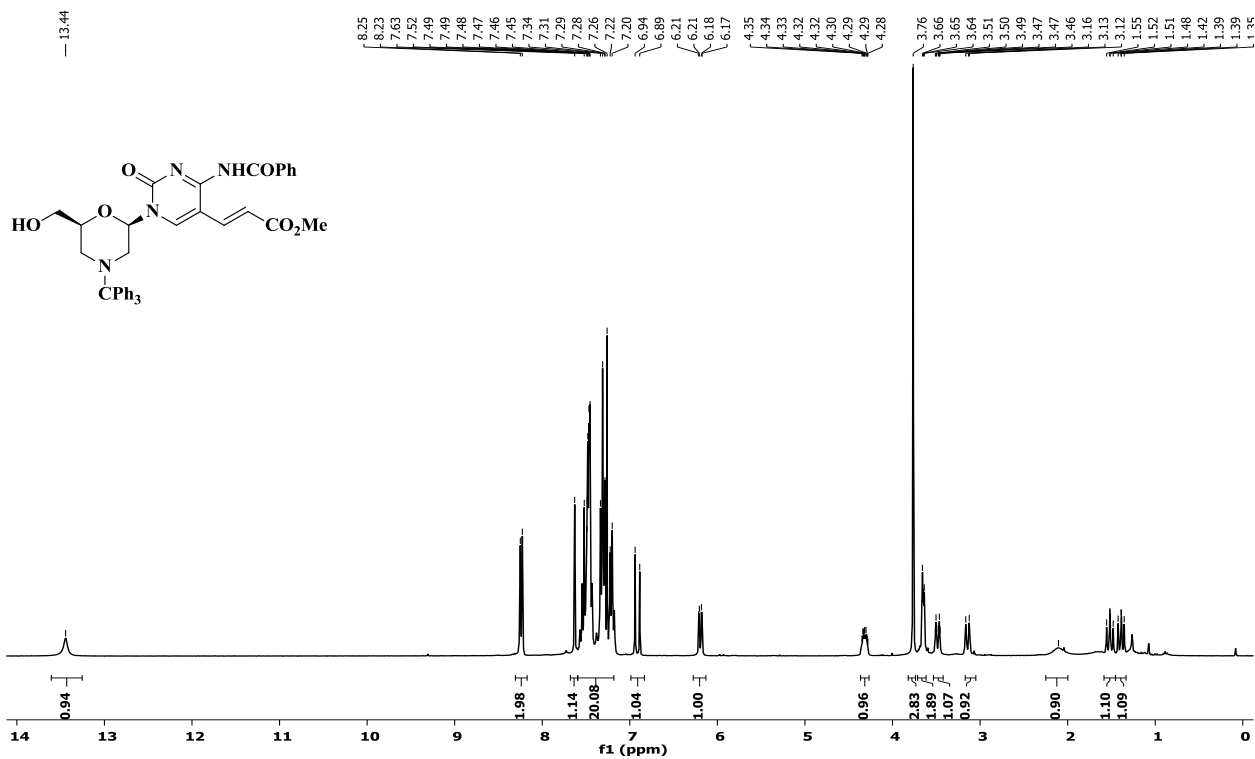

<sup>13</sup>C-NMR of compound **5i**, CDCl<sub>3</sub>, 100 MHz

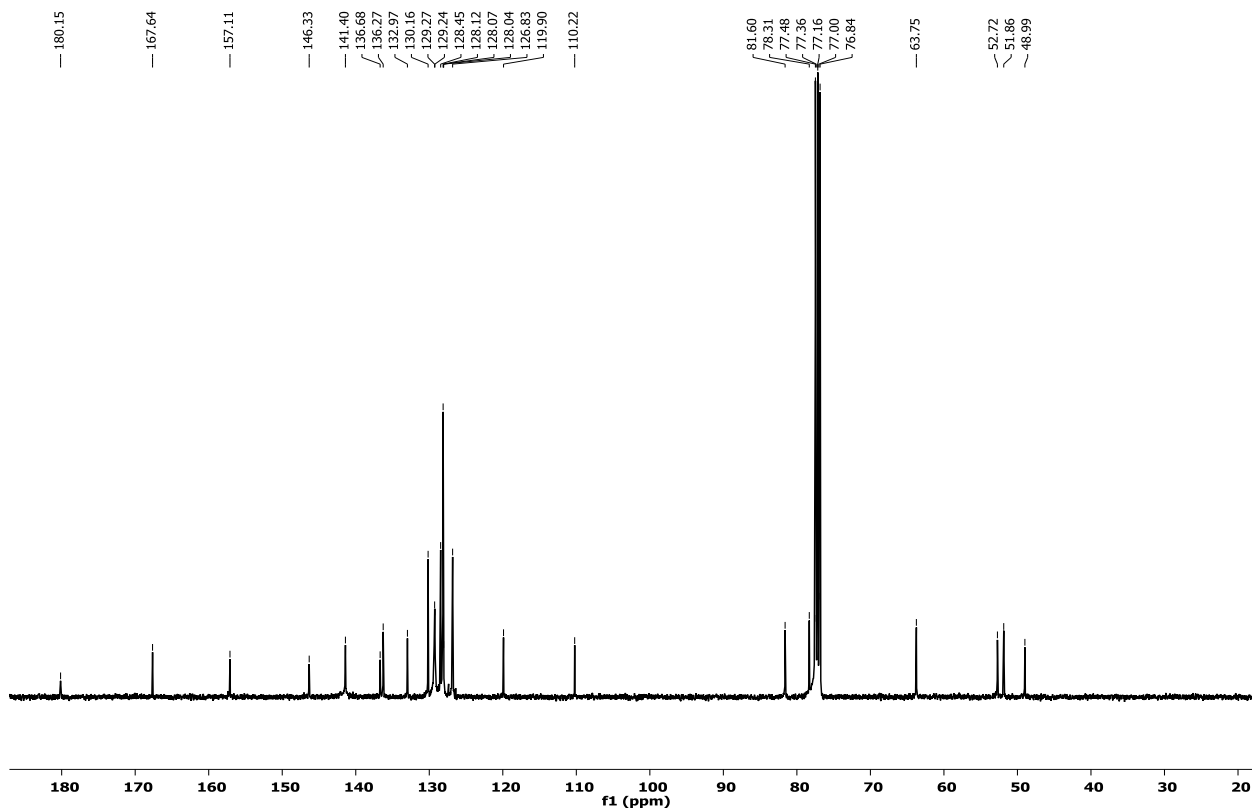



<sup>1</sup>H-NMR of compound **5j**, CDCl<sub>3</sub>, 300 MHz

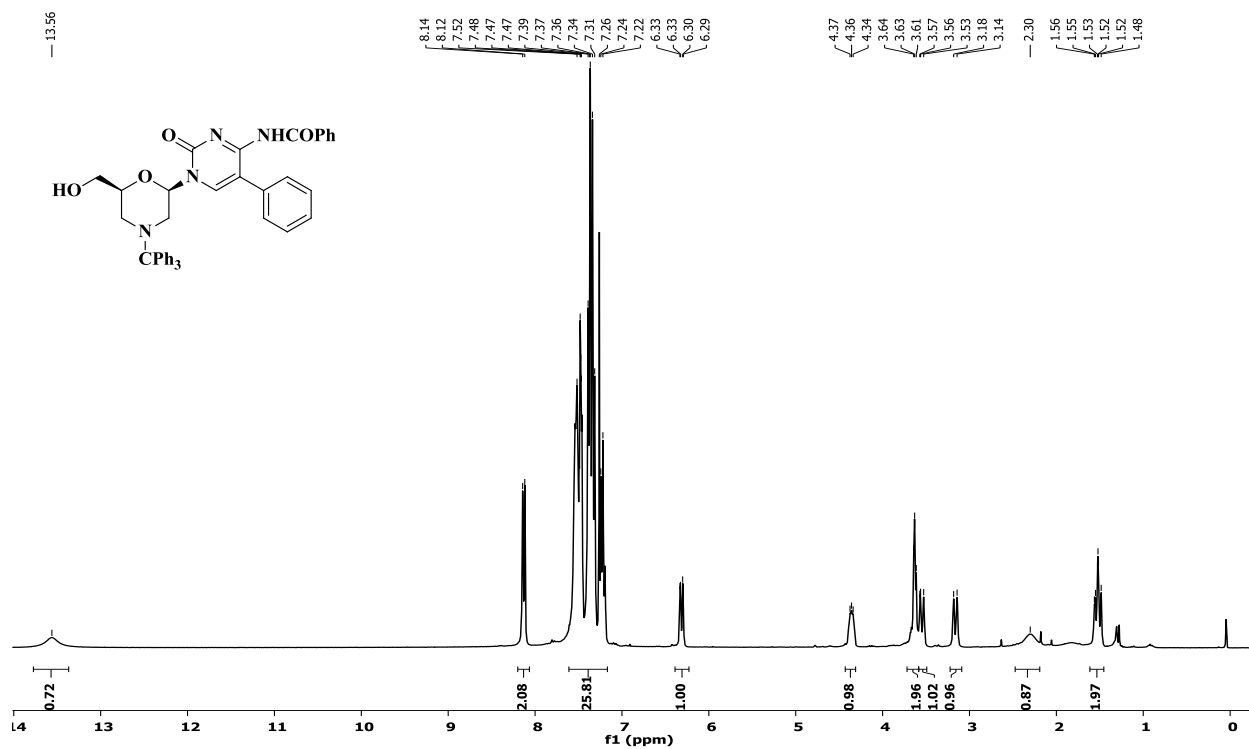

<sup>13</sup>C-NMR of compound **5j**, CDCl<sub>3</sub>, 75 MHz

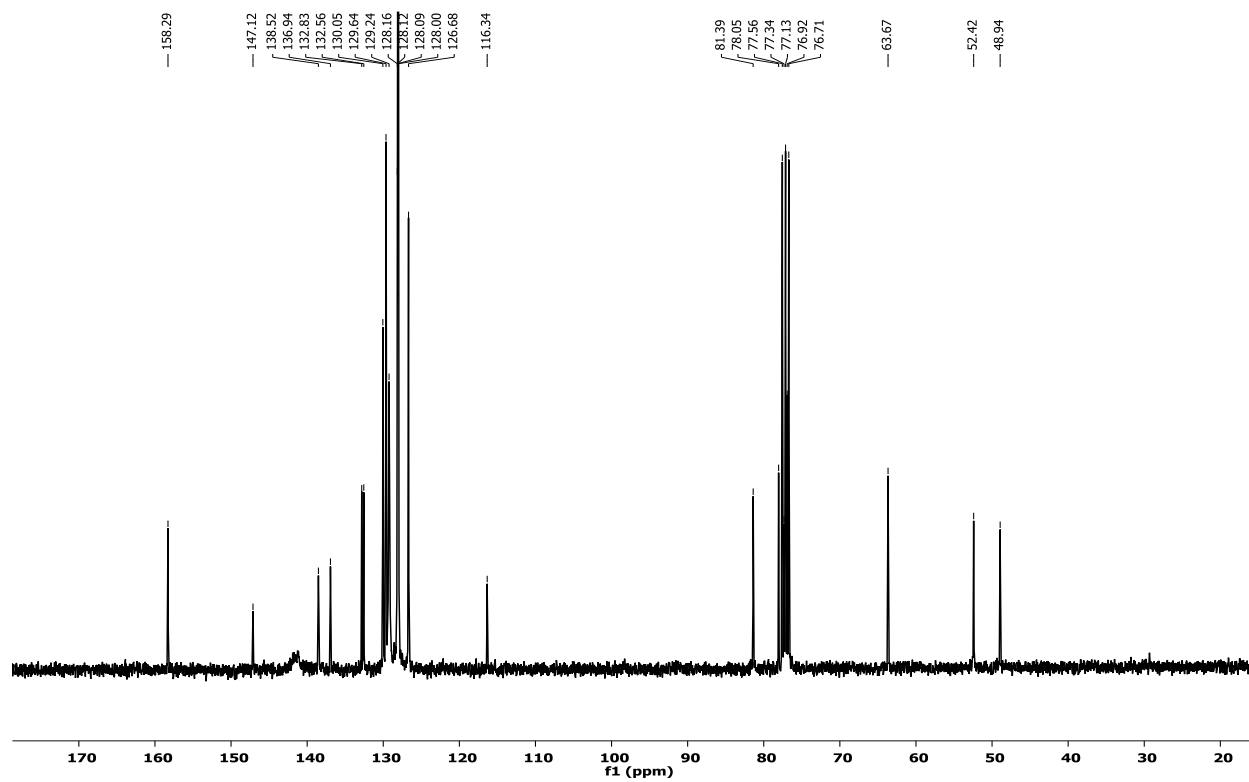

<sup>1</sup>H-NMR of compound **5k**, CDCl<sub>3</sub>, 300 MHz

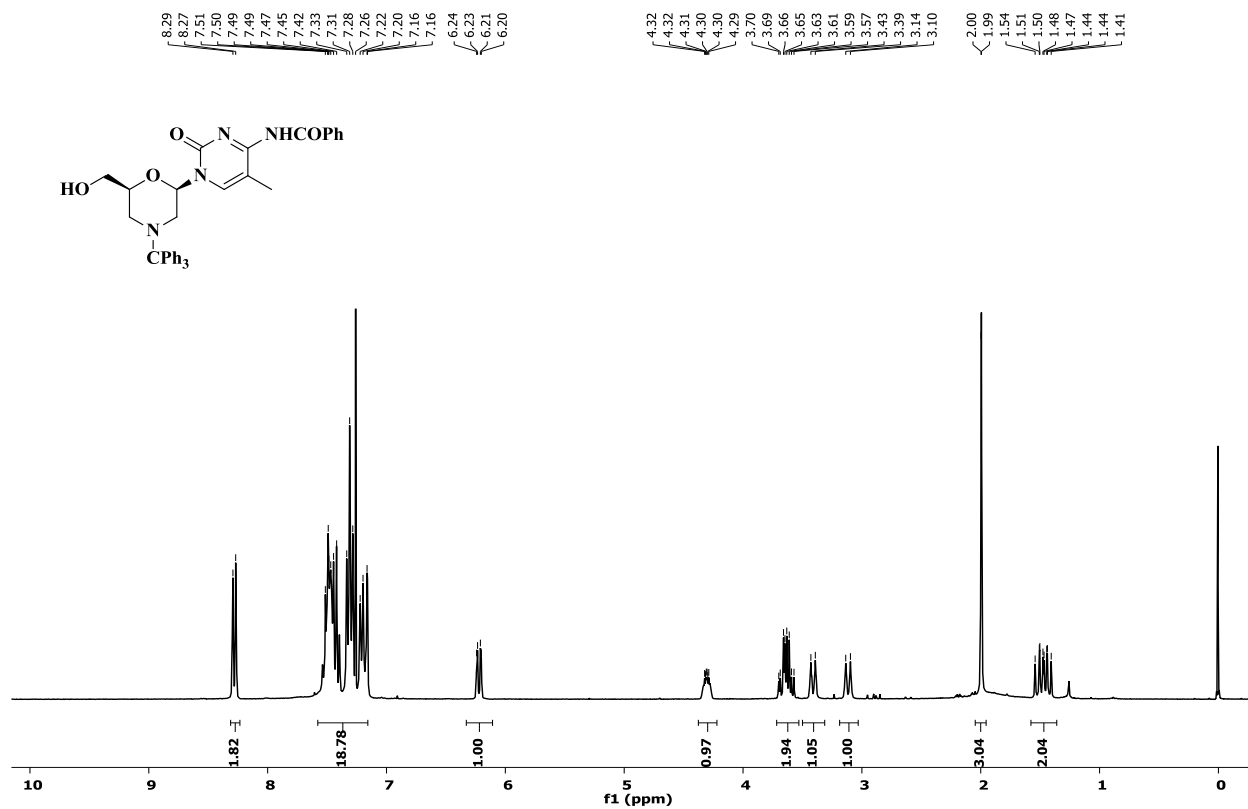

<sup>13</sup>C-NMR of compound **5k**, CDCl<sub>3</sub>, 75 MHz

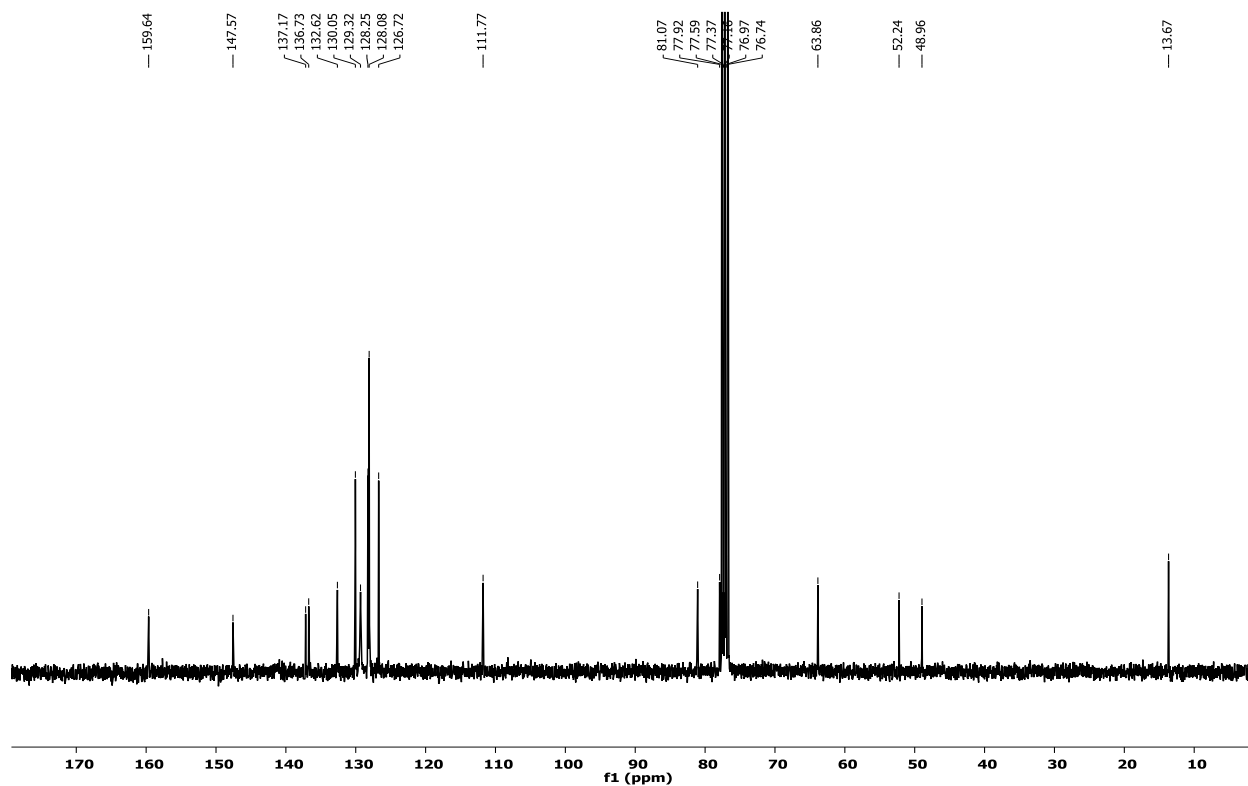

1H-NMR of compound **51**, CDCl<sub>3</sub>, 300 MHz

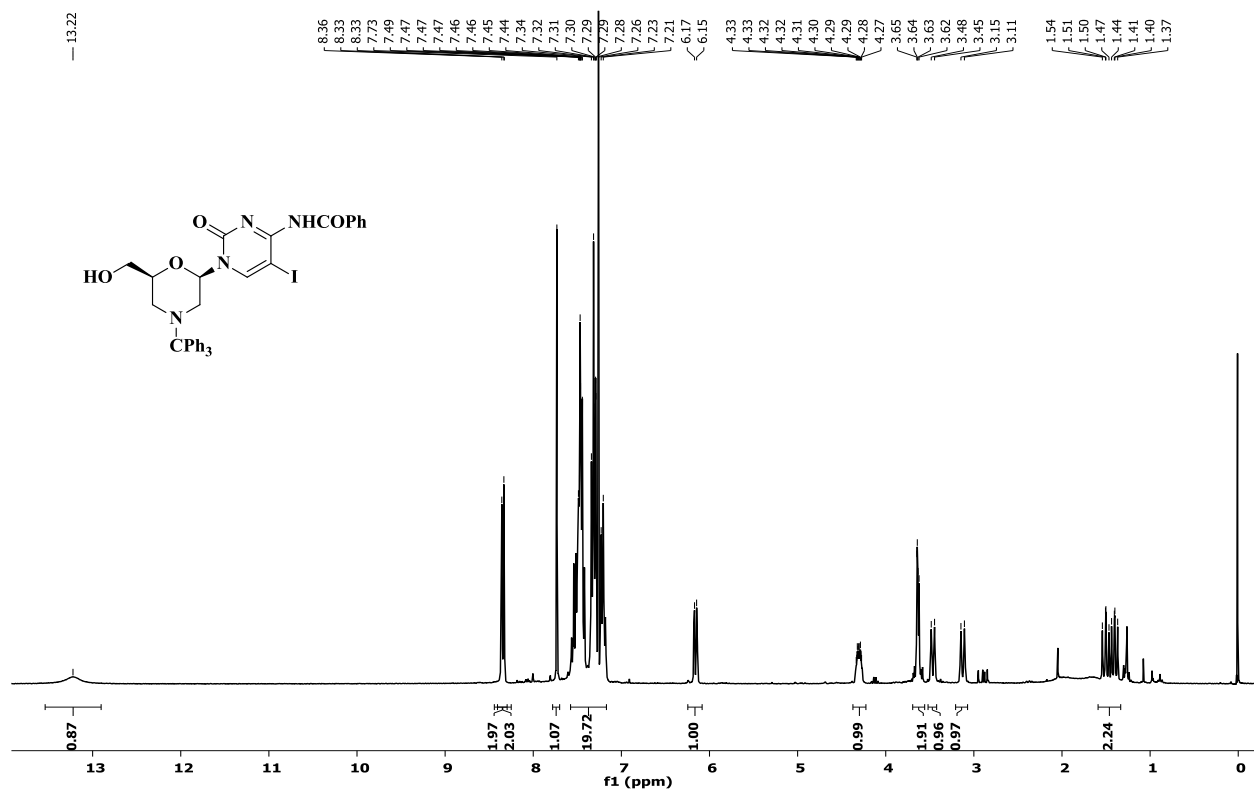

13C-NMR of compound **51**, CDCl<sub>3</sub>, 75 MHz

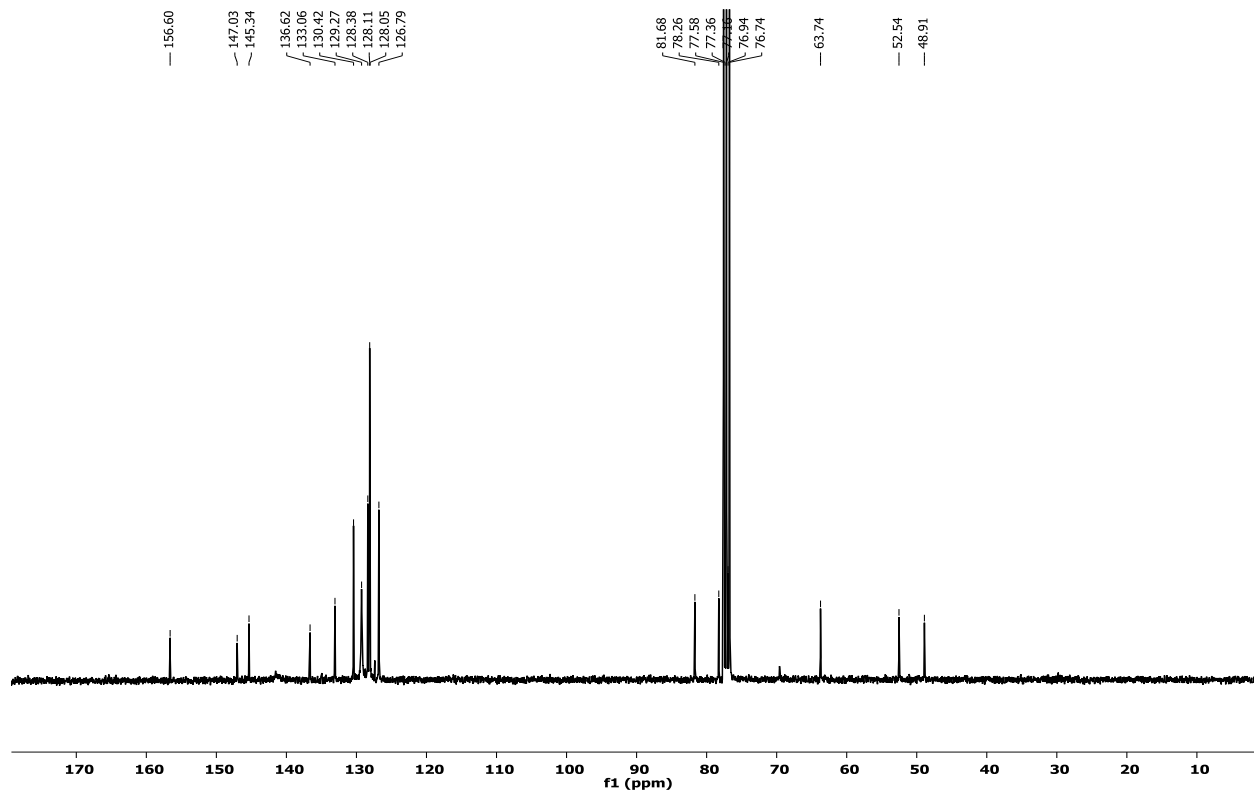

<sup>1</sup>H-NMR of compound **6a**, CDCl<sub>3</sub>, 500 MHz

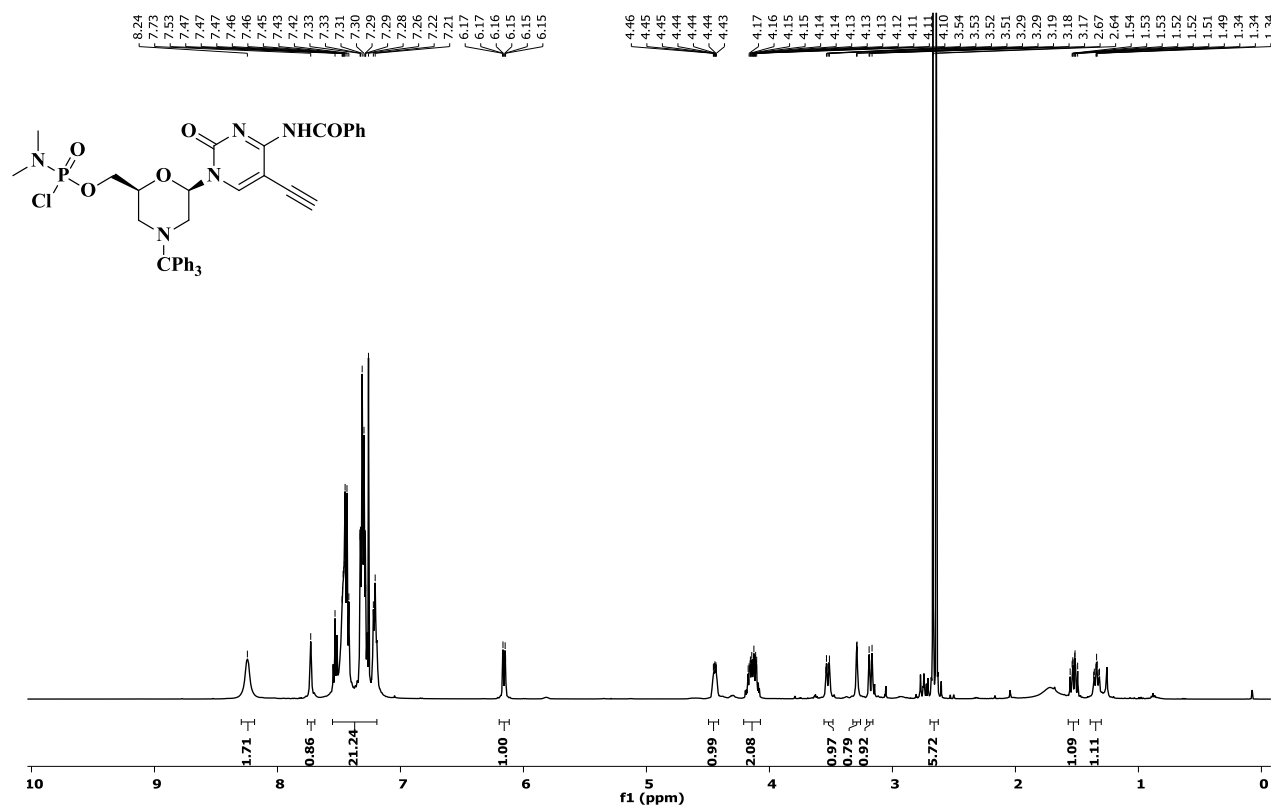

<sup>13</sup>C-NMR of compound **6a**, CDCl<sub>3</sub>, 75 MHz

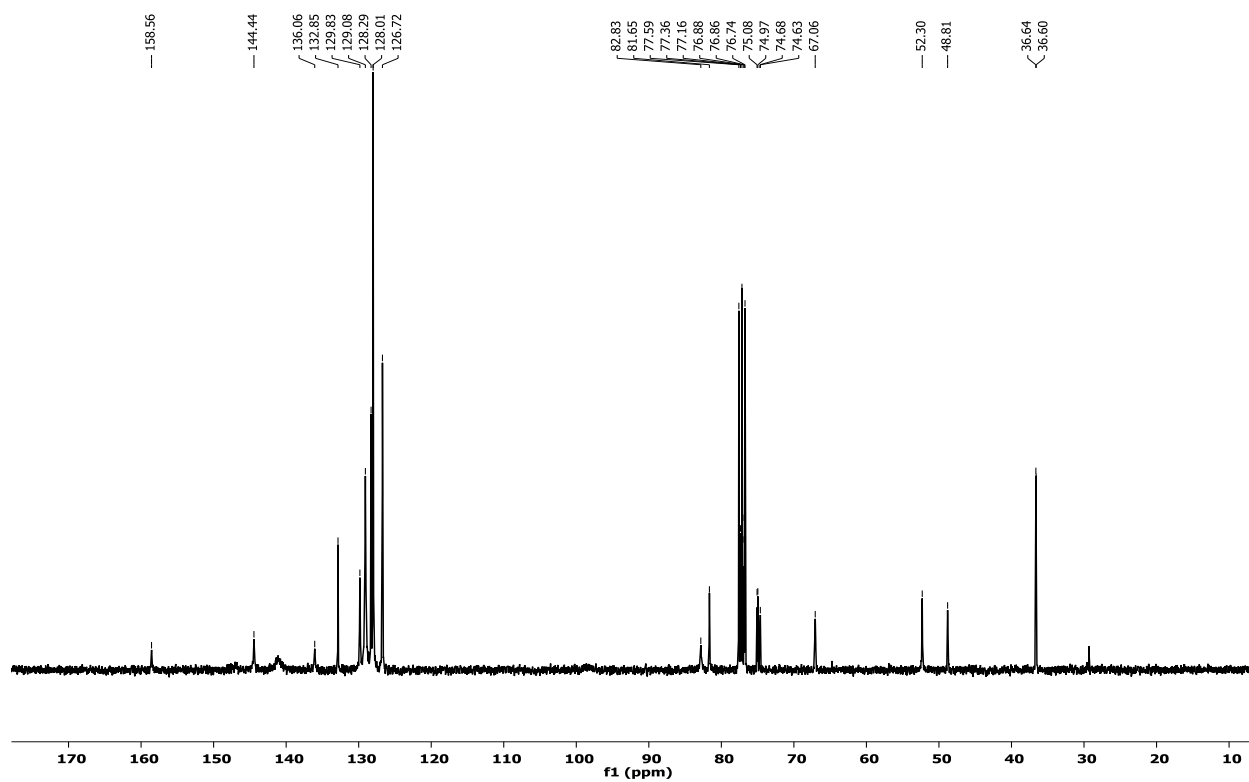

31P-NMR of compound **6a**, CDCl<sub>3</sub>, 121 MHz

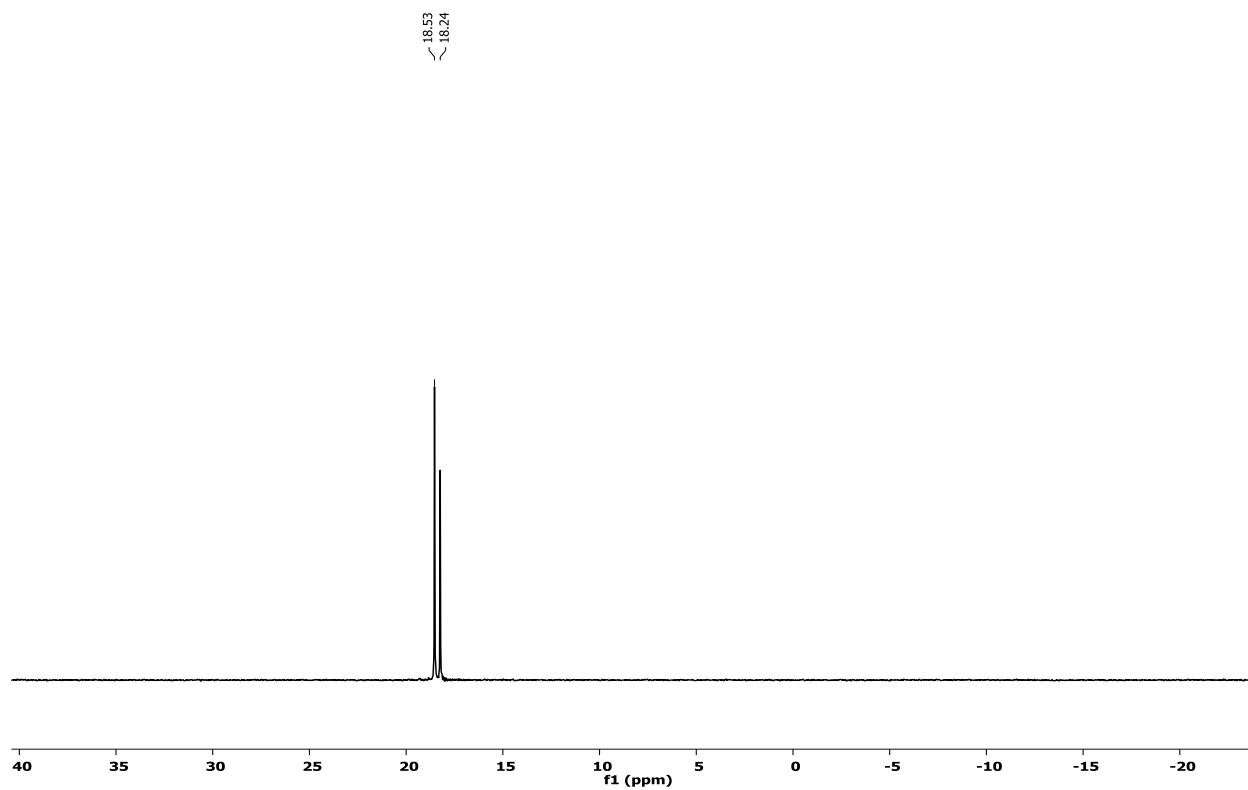

1H-NMR of compound **6b**, CDCl<sub>3</sub>, 400 MHz

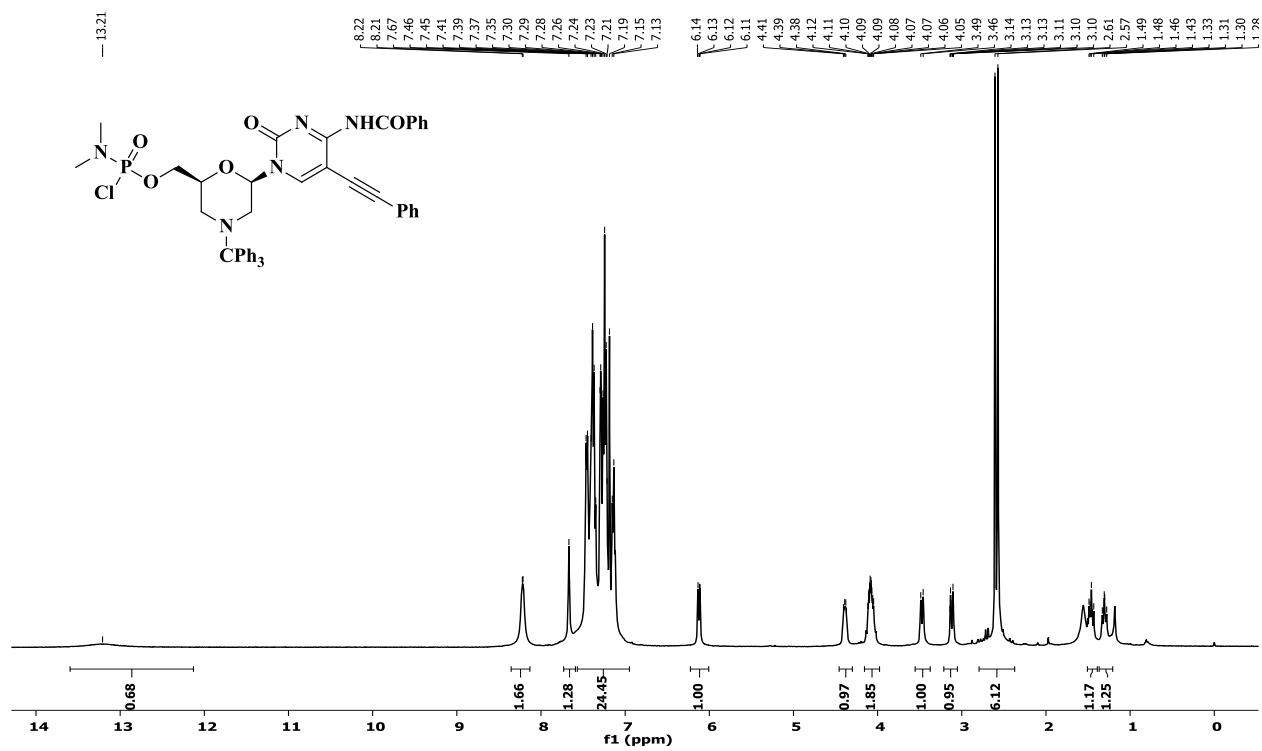

<sup>13</sup>C-NMR of compound **6b**, CDCl<sub>3</sub>, 100 MHz

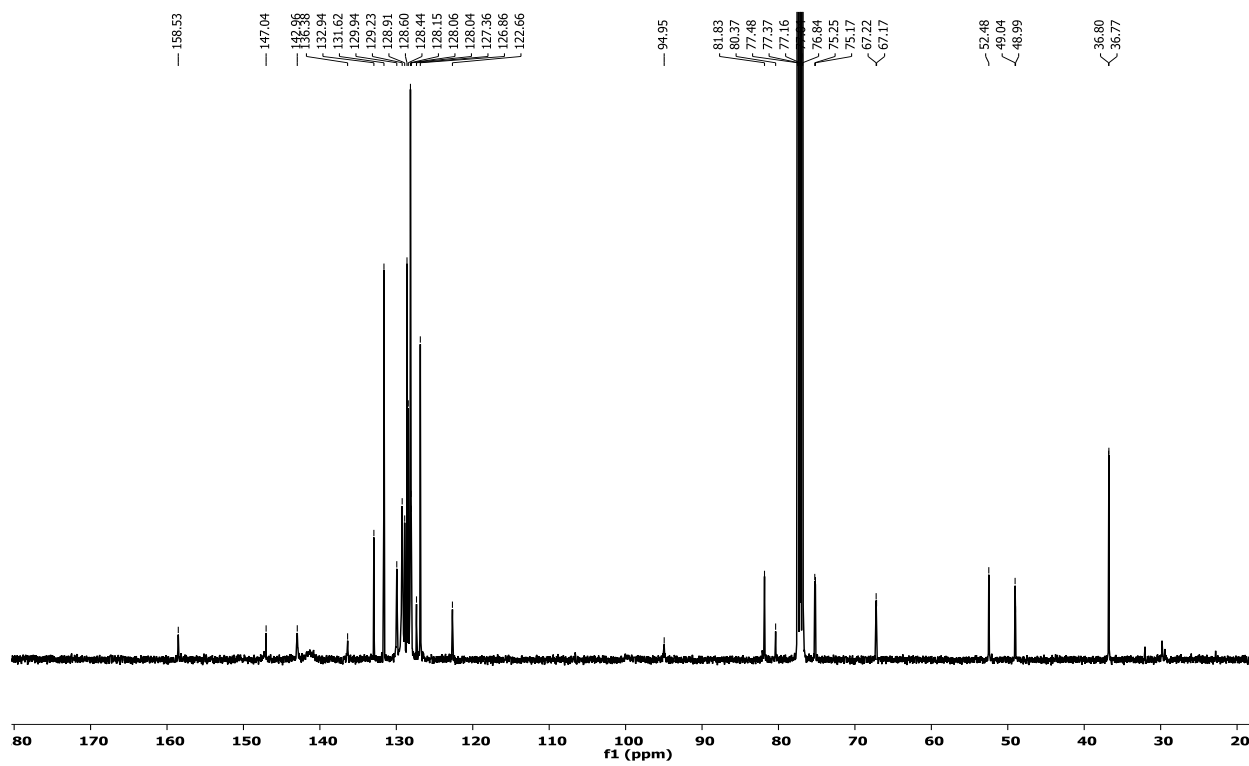

<sup>31</sup>P-NMR of compound **6b**, CDCl<sub>3</sub>, 162 MHz

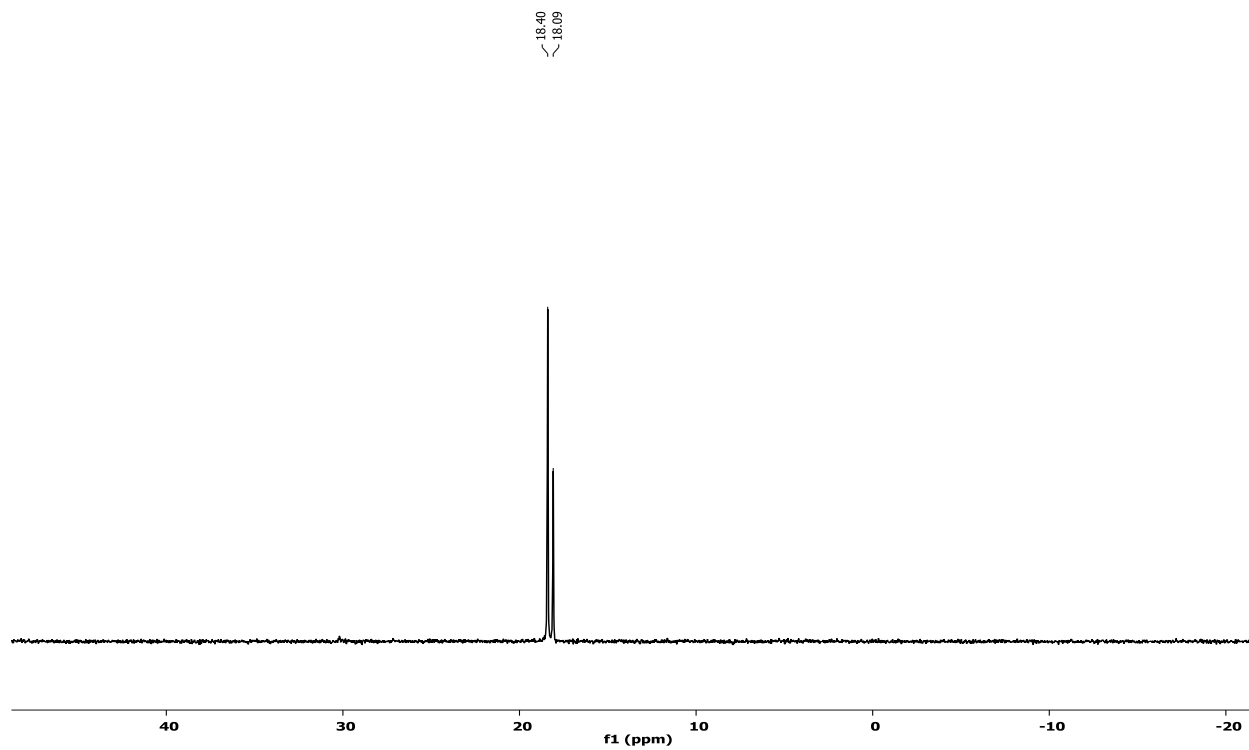

<sup>1</sup>H-NMR of compound **6c**, CDCl<sub>3</sub>, 300 MHz

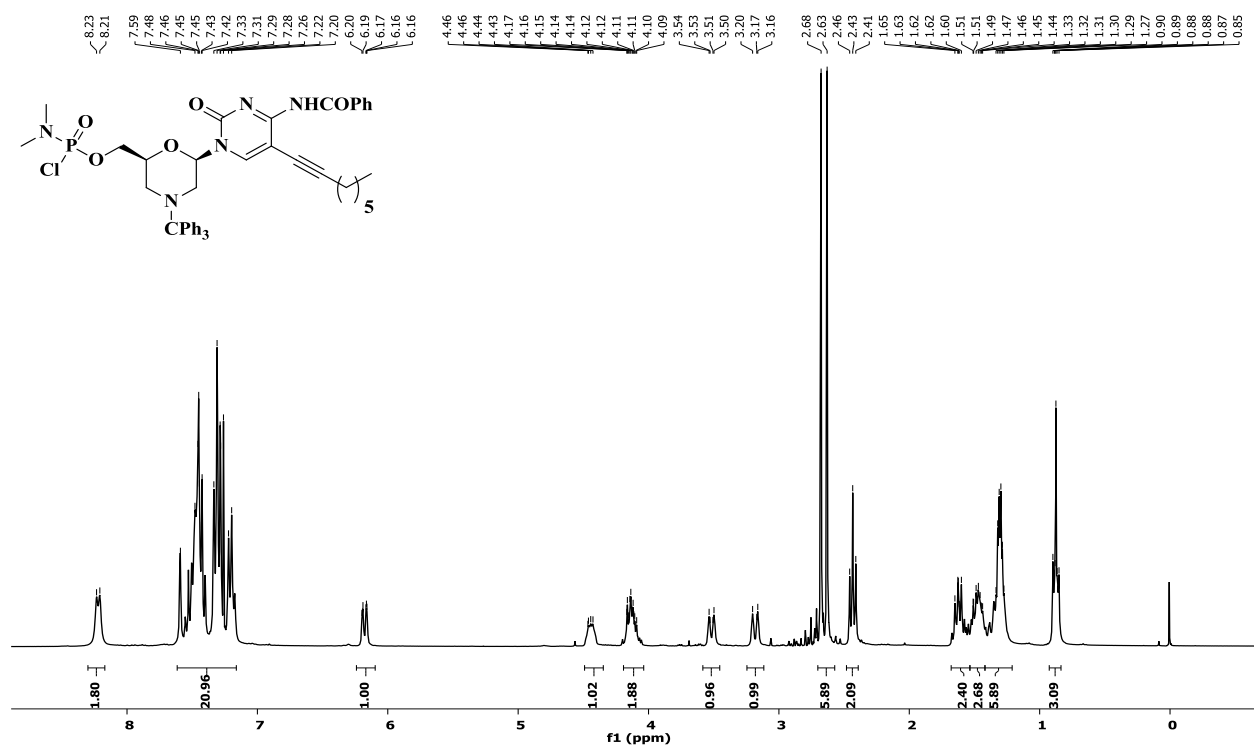

<sup>13</sup>C-NMR of compound **6c**, CDCl<sub>3</sub>, 75 MHz

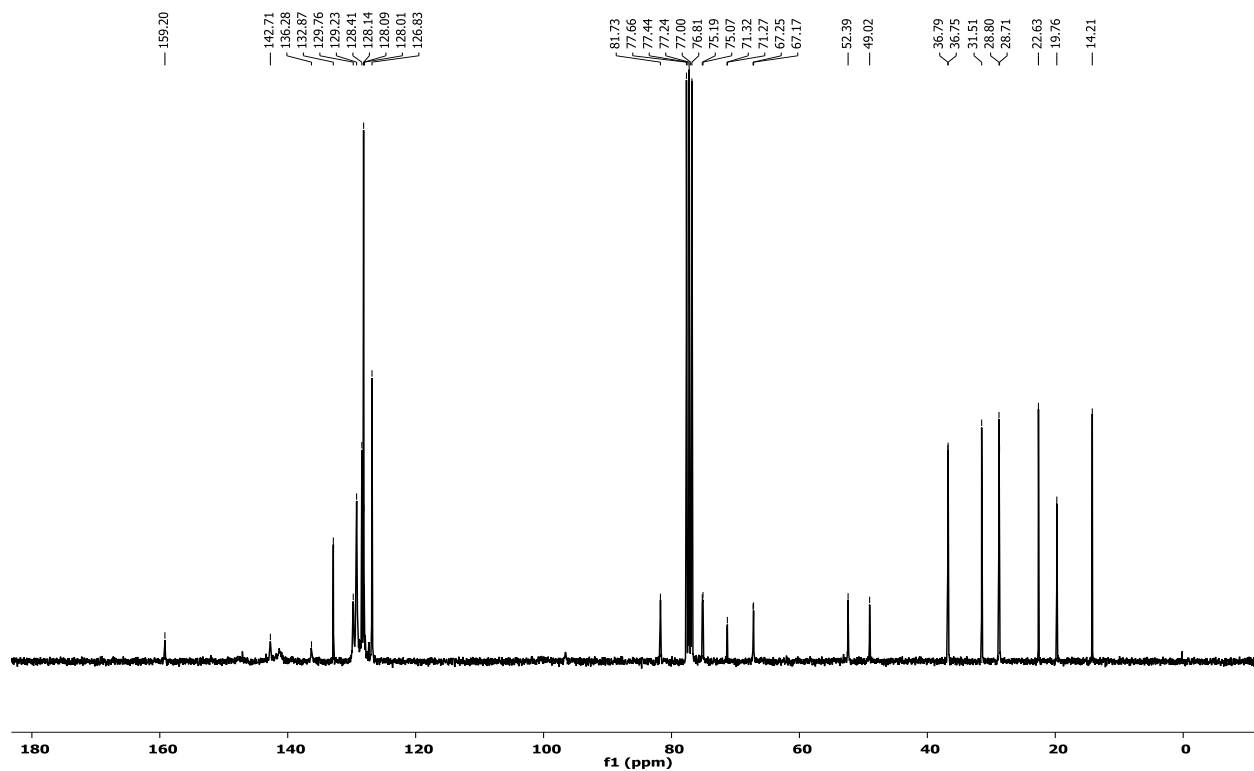

31P-NMR of compound **6c**, CDCl<sub>3</sub>, 121 MHz

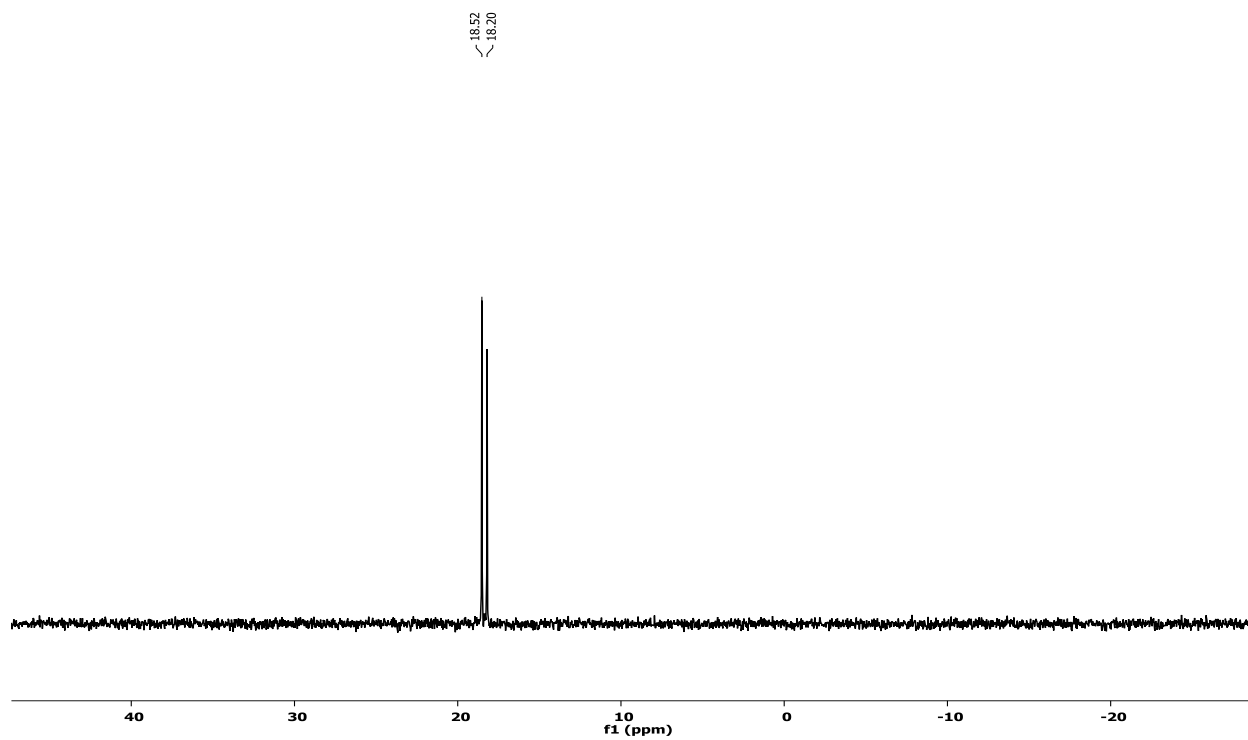

1H-NMR of compound **6d**, CDCl<sub>3</sub>, 300 MHz

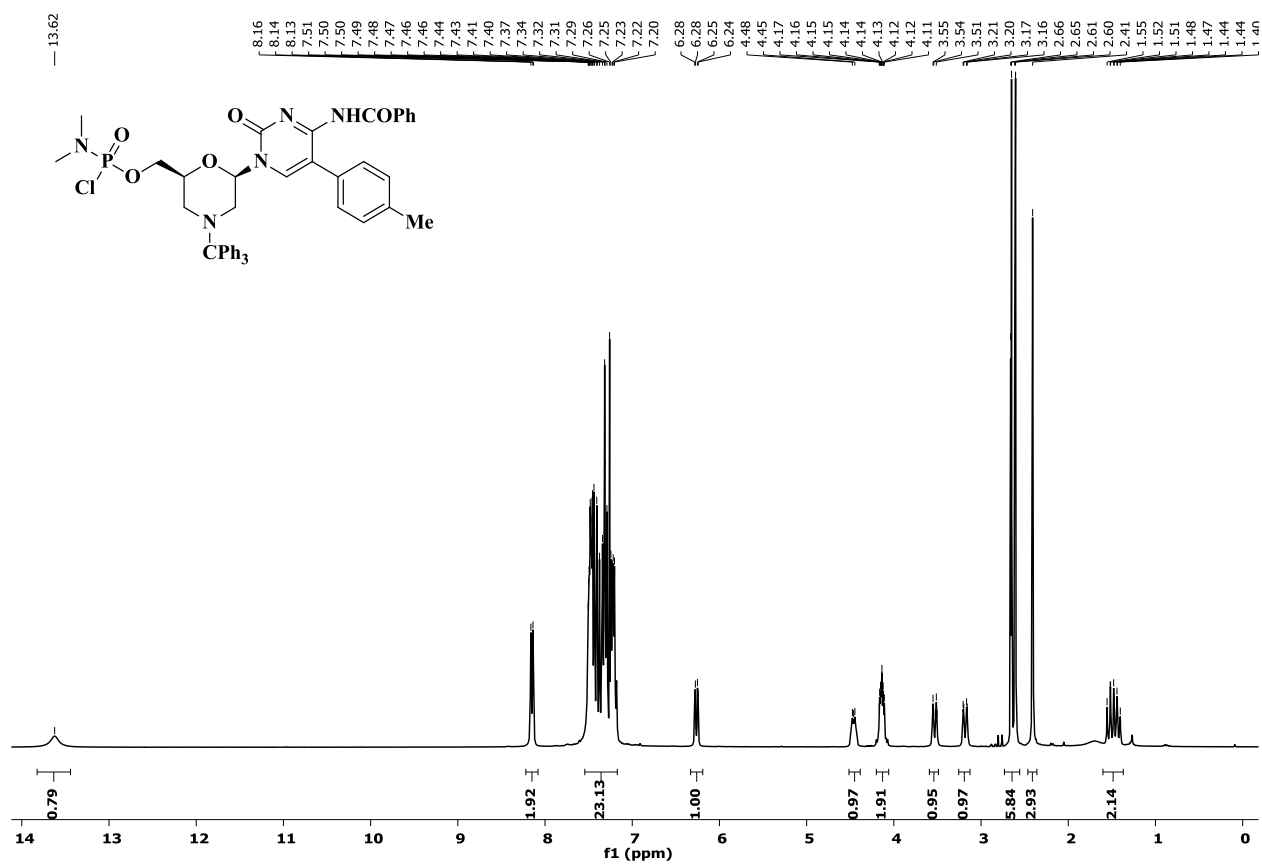



<sup>13</sup>C-NMR of compound **6d**, CDCl<sub>3</sub>, 100 MHz

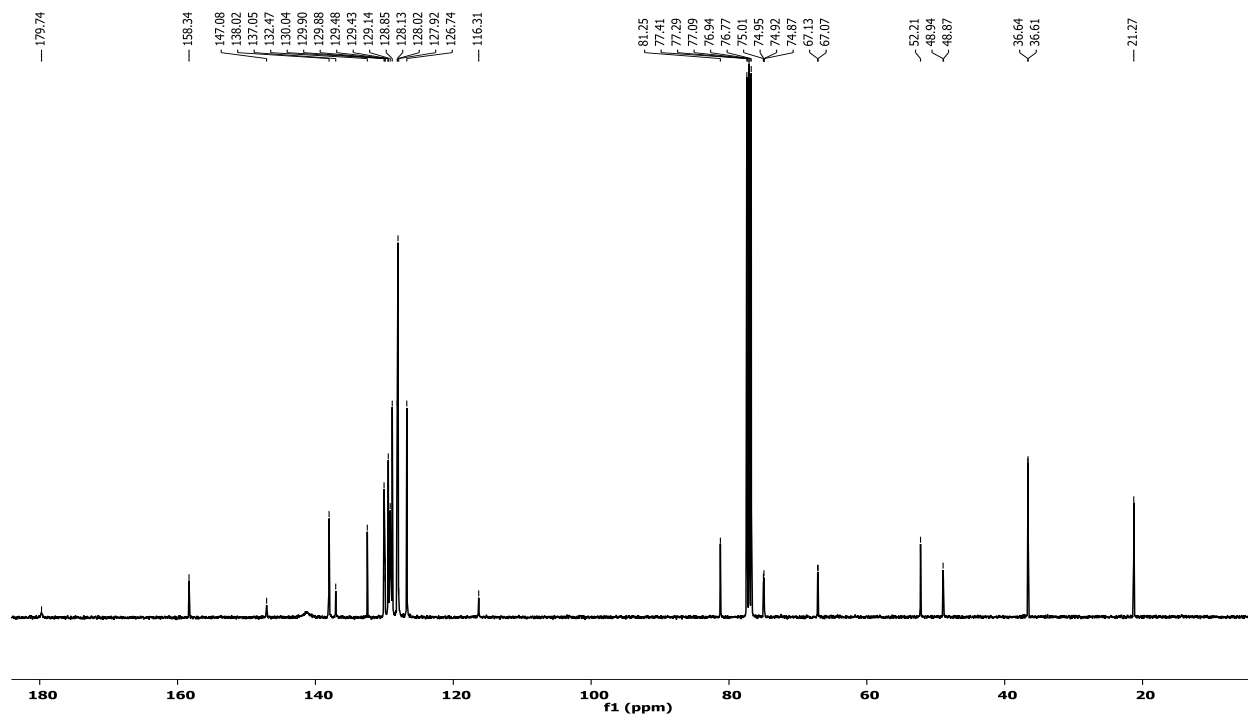

<sup>31</sup>P-NMR of compound **6d**, CDCl<sub>3</sub>, 162 MHz

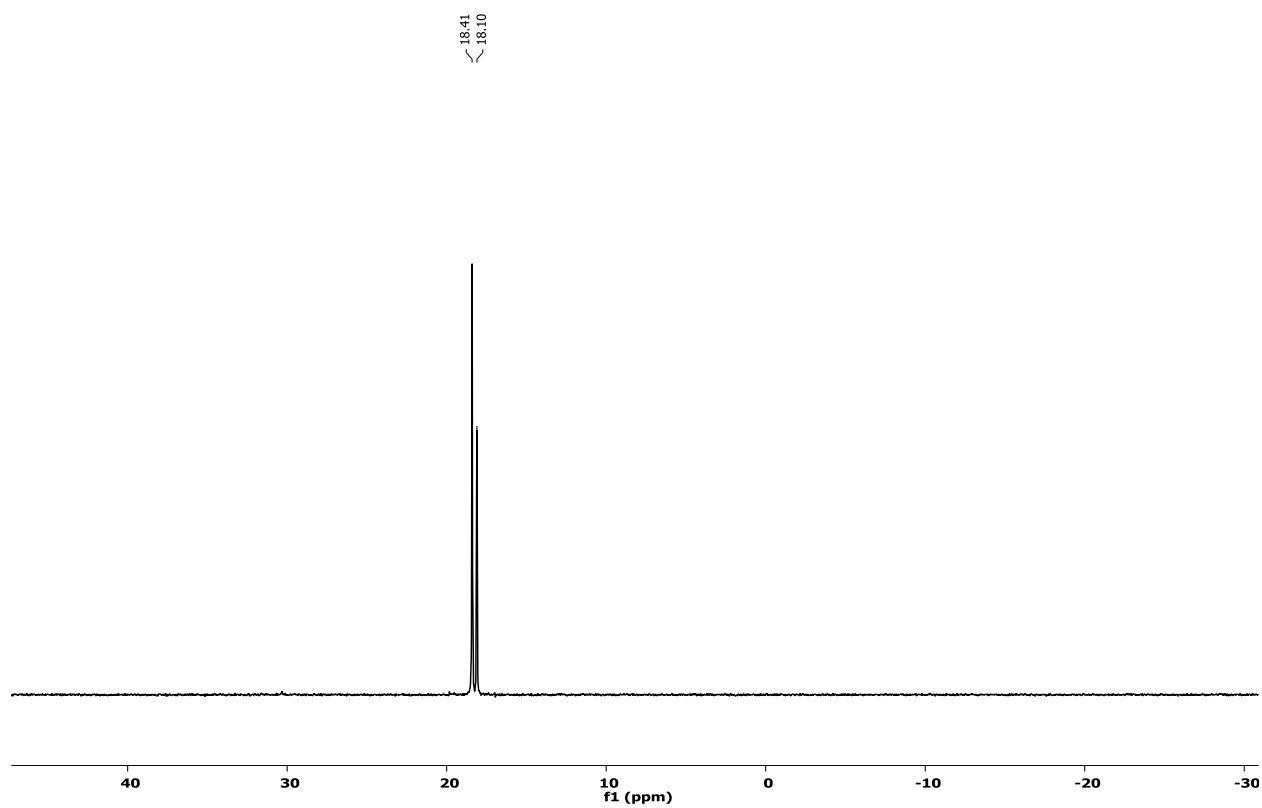

<sup>1</sup>H-NMR of compound **6e**, CDCl<sub>3</sub>, 300 MHz

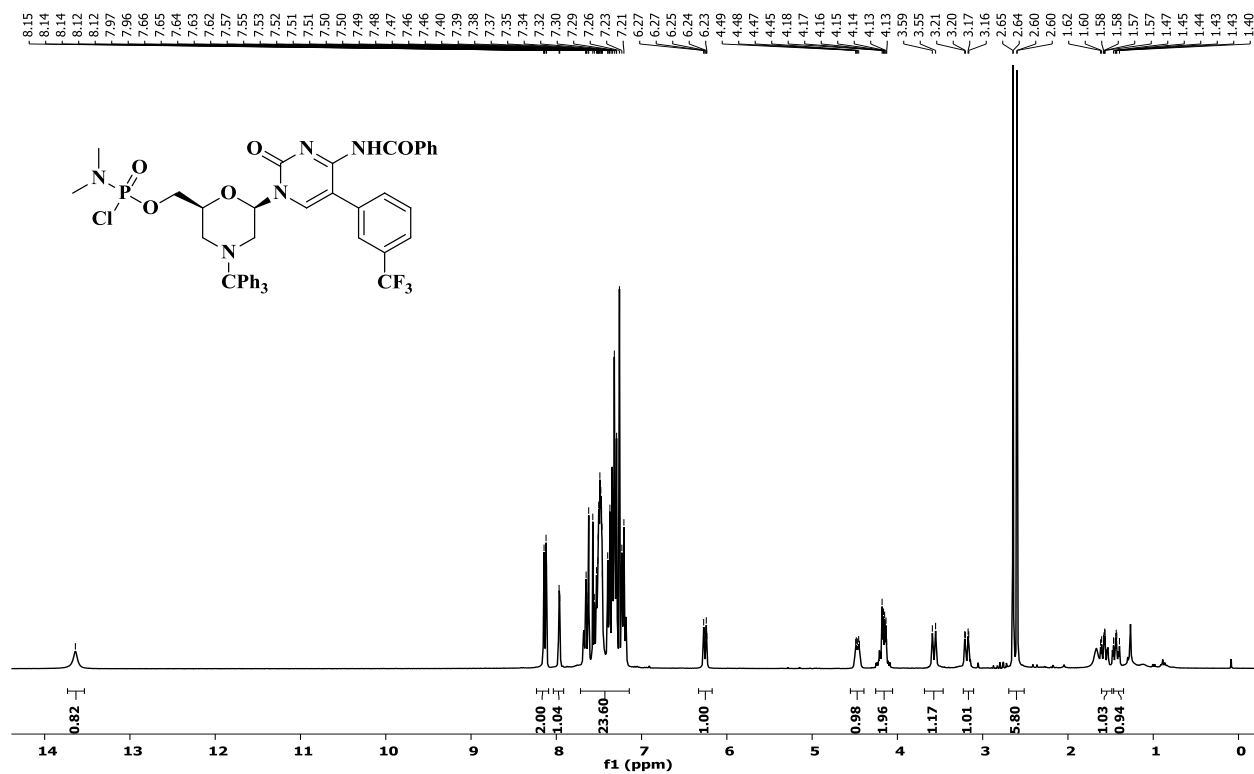

<sup>13</sup>C-NMR of compound **6e**, CDCl<sub>3</sub>, 100 MHz

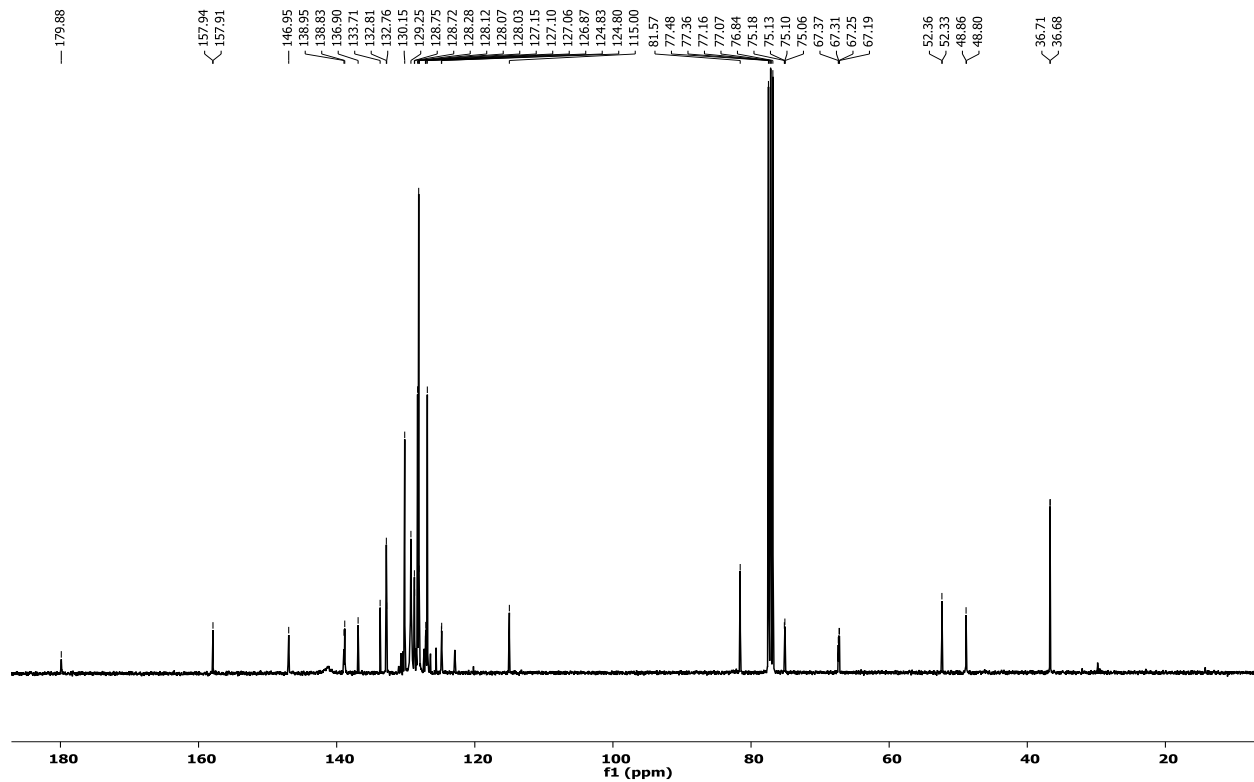

31P-NMR of compound **6e**, CDCl<sub>3</sub>, 162 MHz

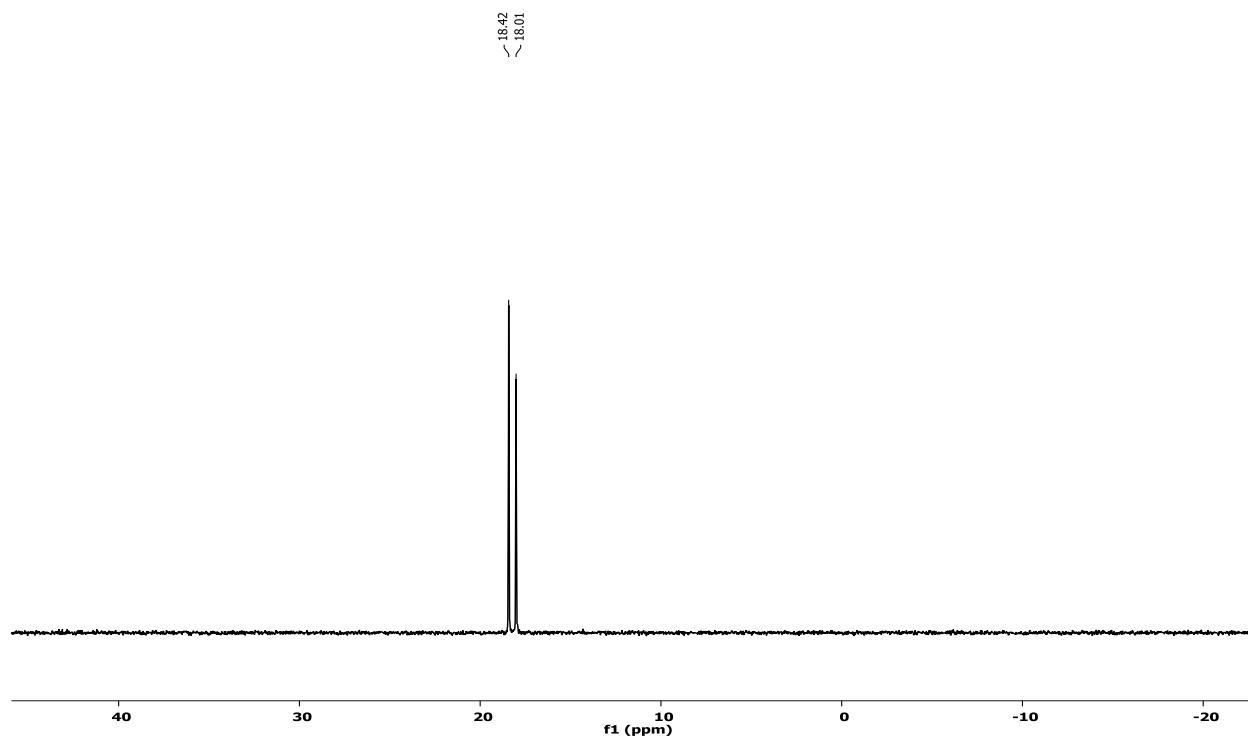

<sup>1</sup>H-NMR of compound **6f**, CDCl<sub>3</sub>, 300 MHz

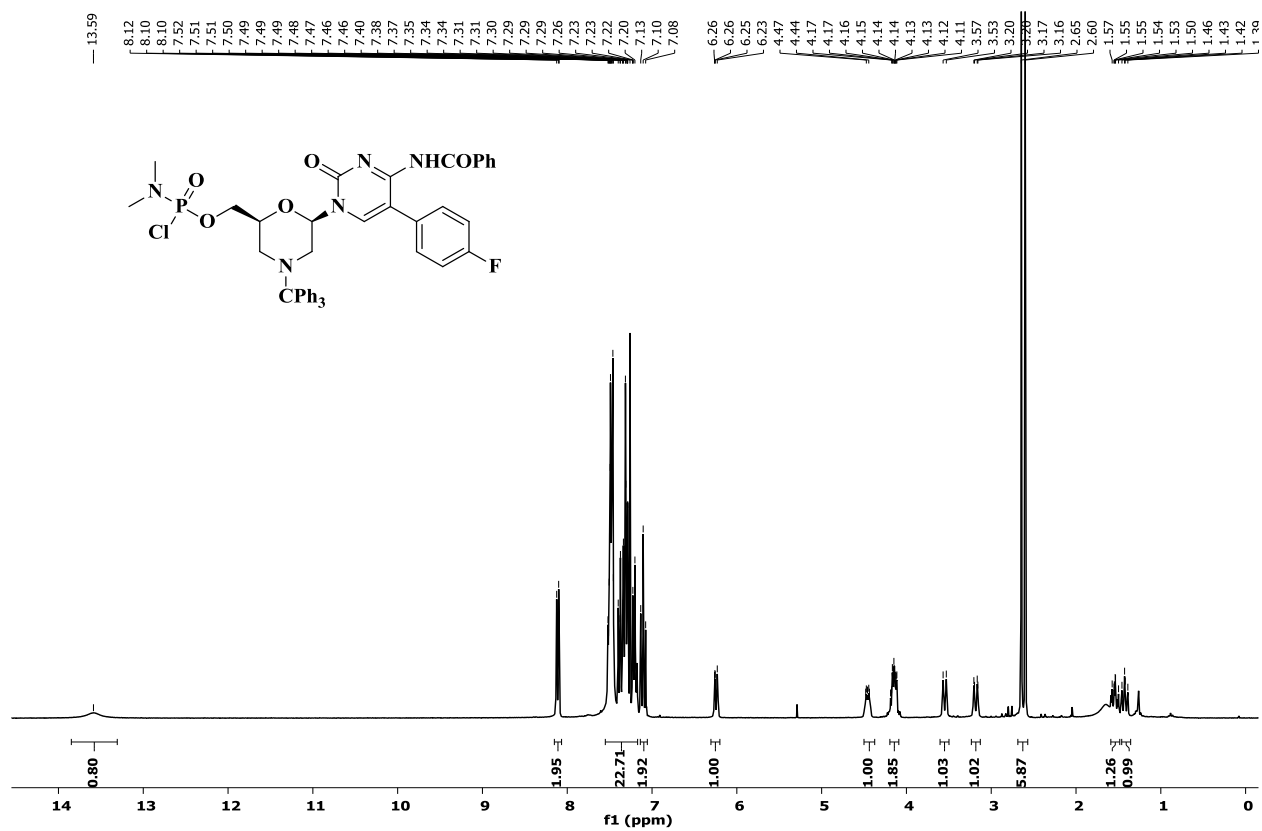

$^{13}\text{C}$ -NMR of compound **6f**,  $\text{CDCl}_3$ , 100 MHz

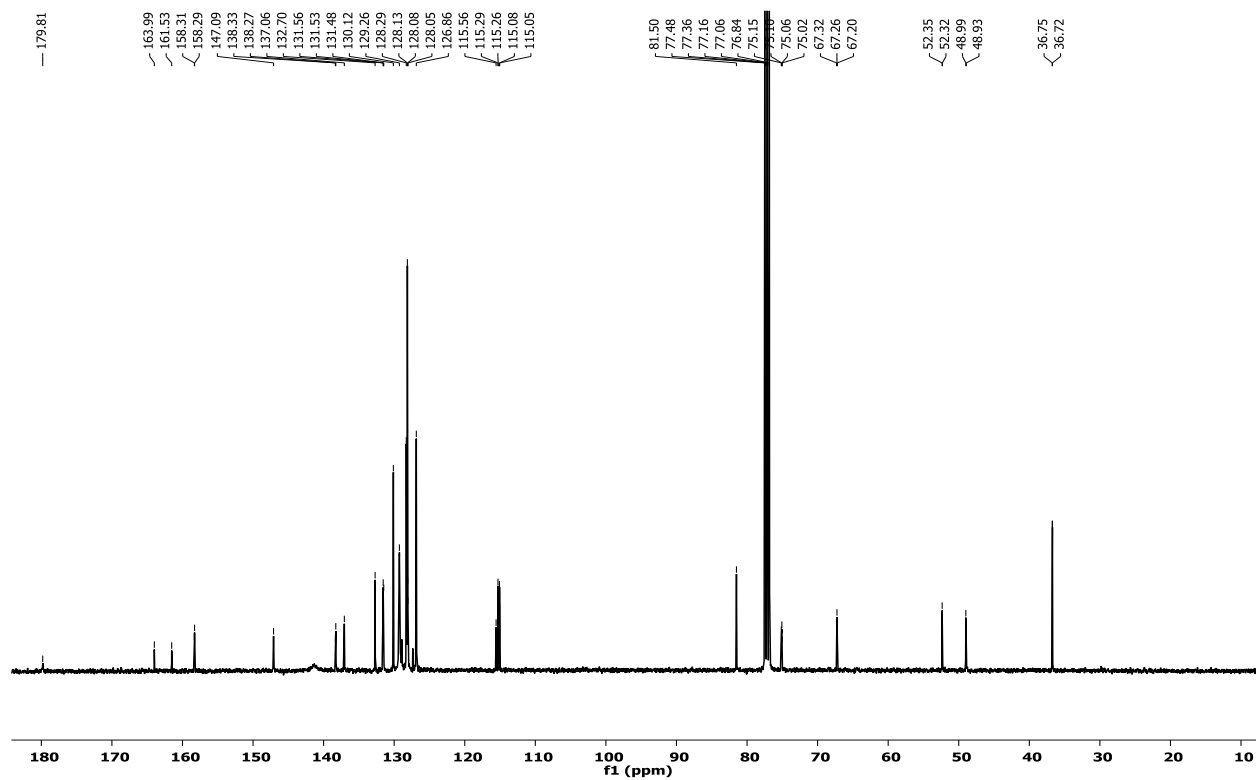

$^{31}\text{P}$ -NMR of compound **6f**,  $\text{CDCl}_3$ , 162 MHz

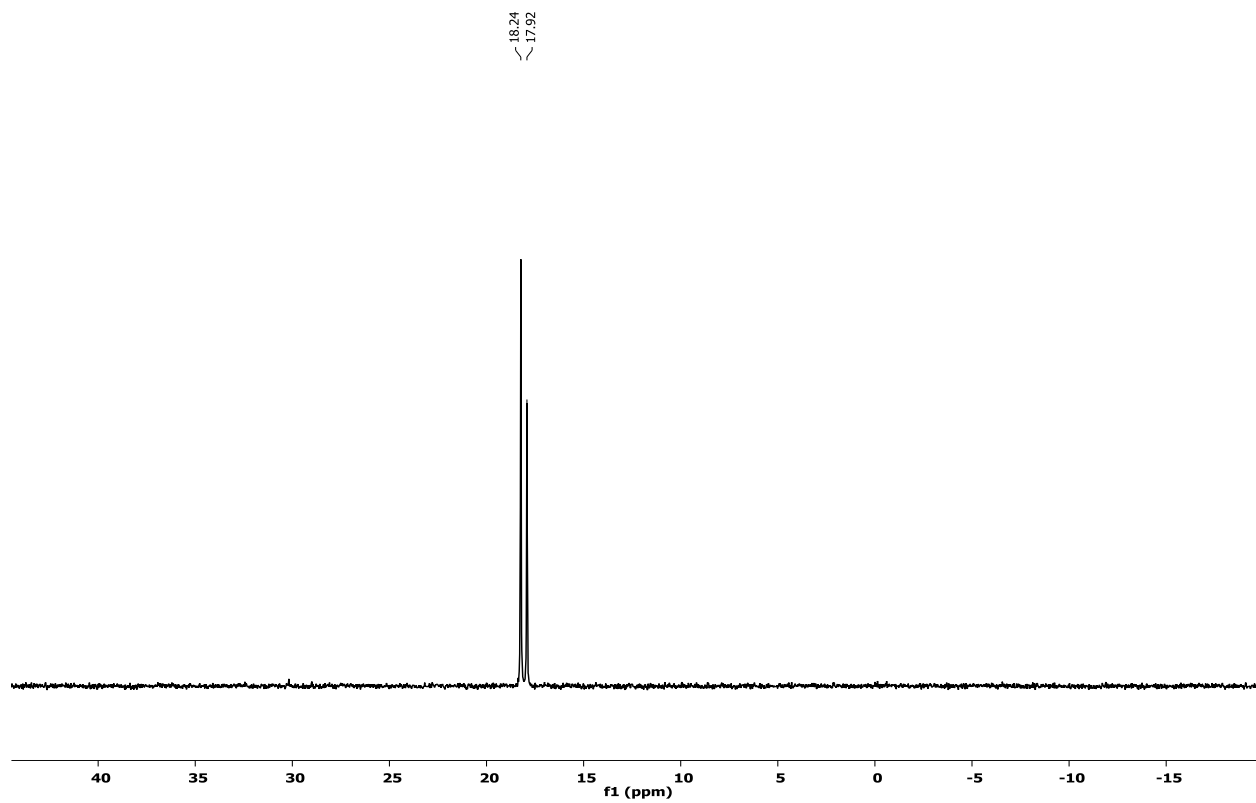

1H-NMR of compound **6g**, CDCl<sub>3</sub>, 300 MHz

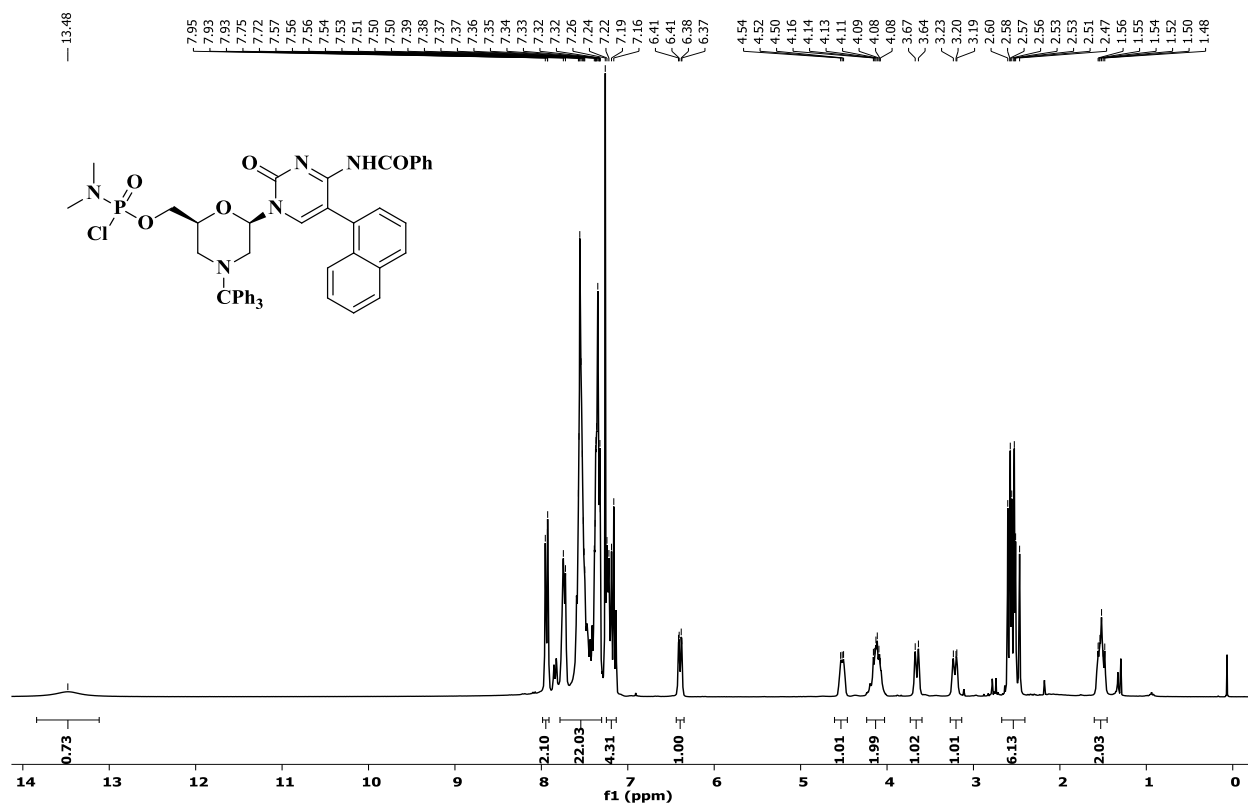

13C-NMR of compound **6g**, CDCl<sub>3</sub>, 75 MHz

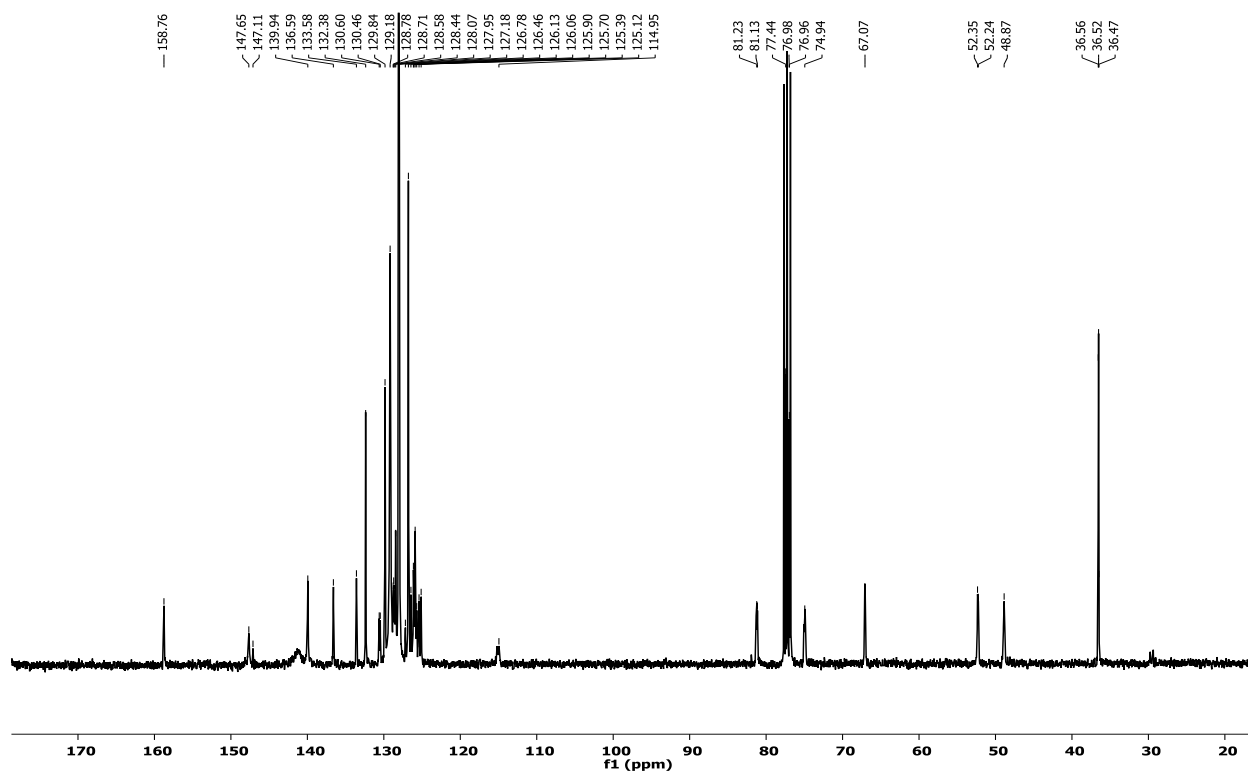

31P-NMR of compound **6g**, CDCl<sub>3</sub>, 121 MHz

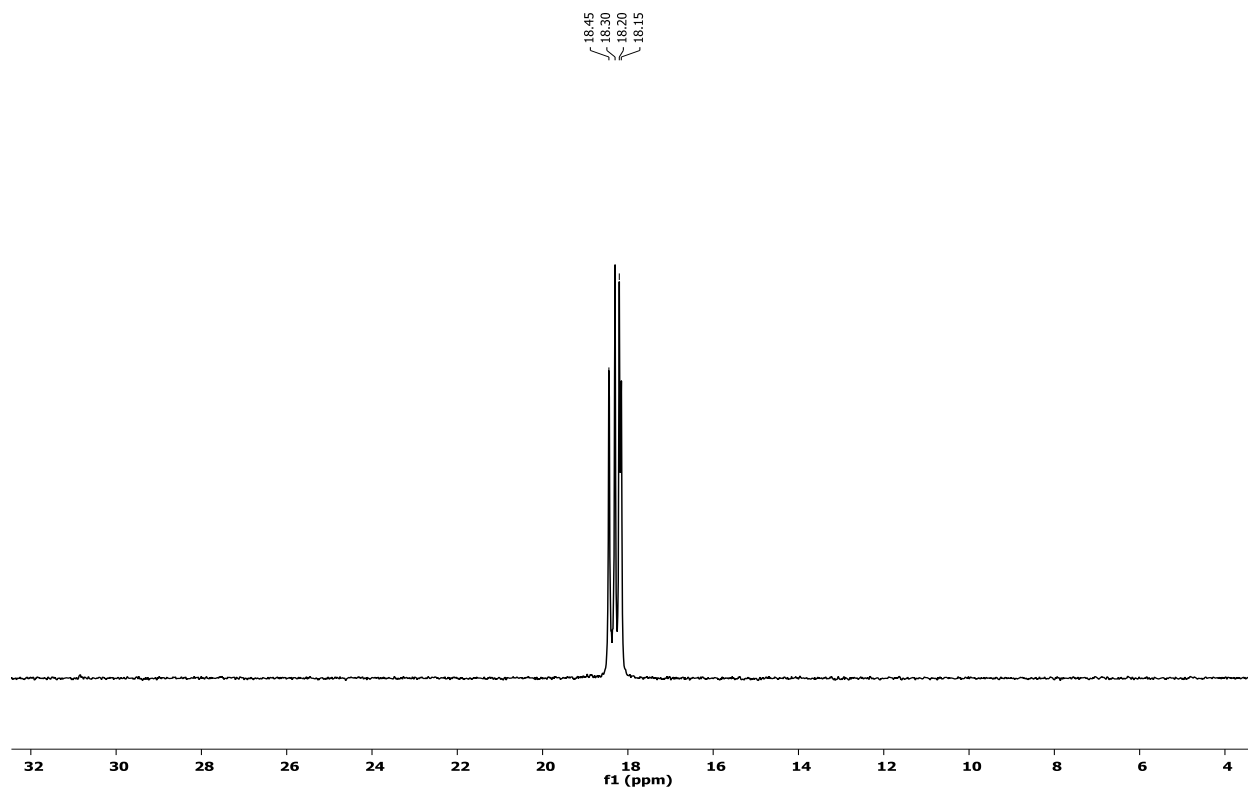

1H-NMR of compound **6h**, CDCl<sub>3</sub>, 300 MHz

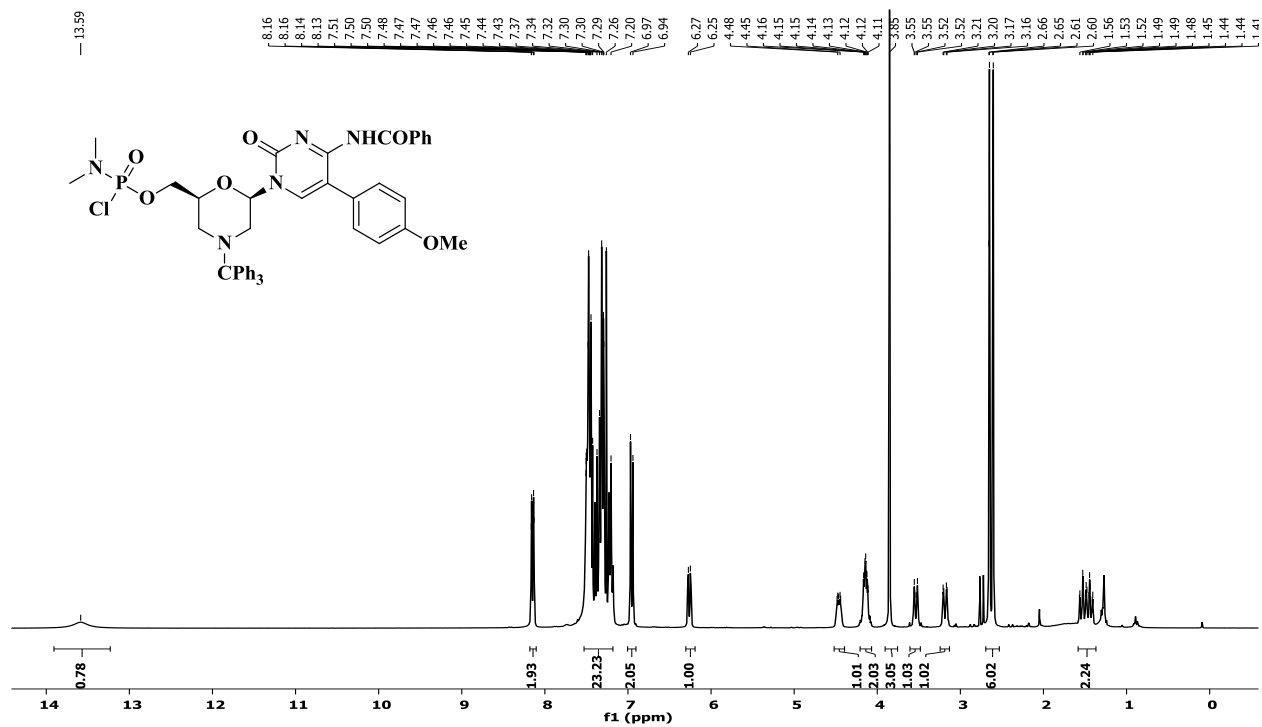

13C-NMR of compound **6h**, CDCl<sub>3</sub>, 100 MHz

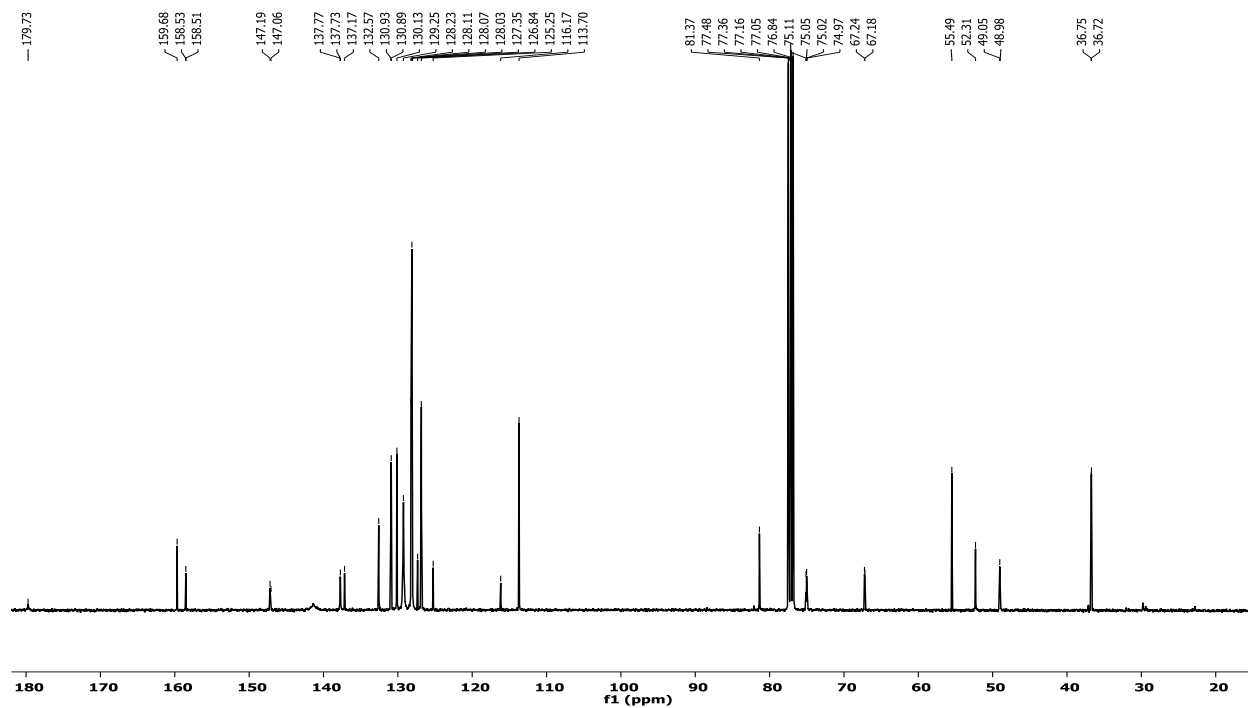

31P-NMR of compound **6h**, CDCl<sub>3</sub>, 162 MHz

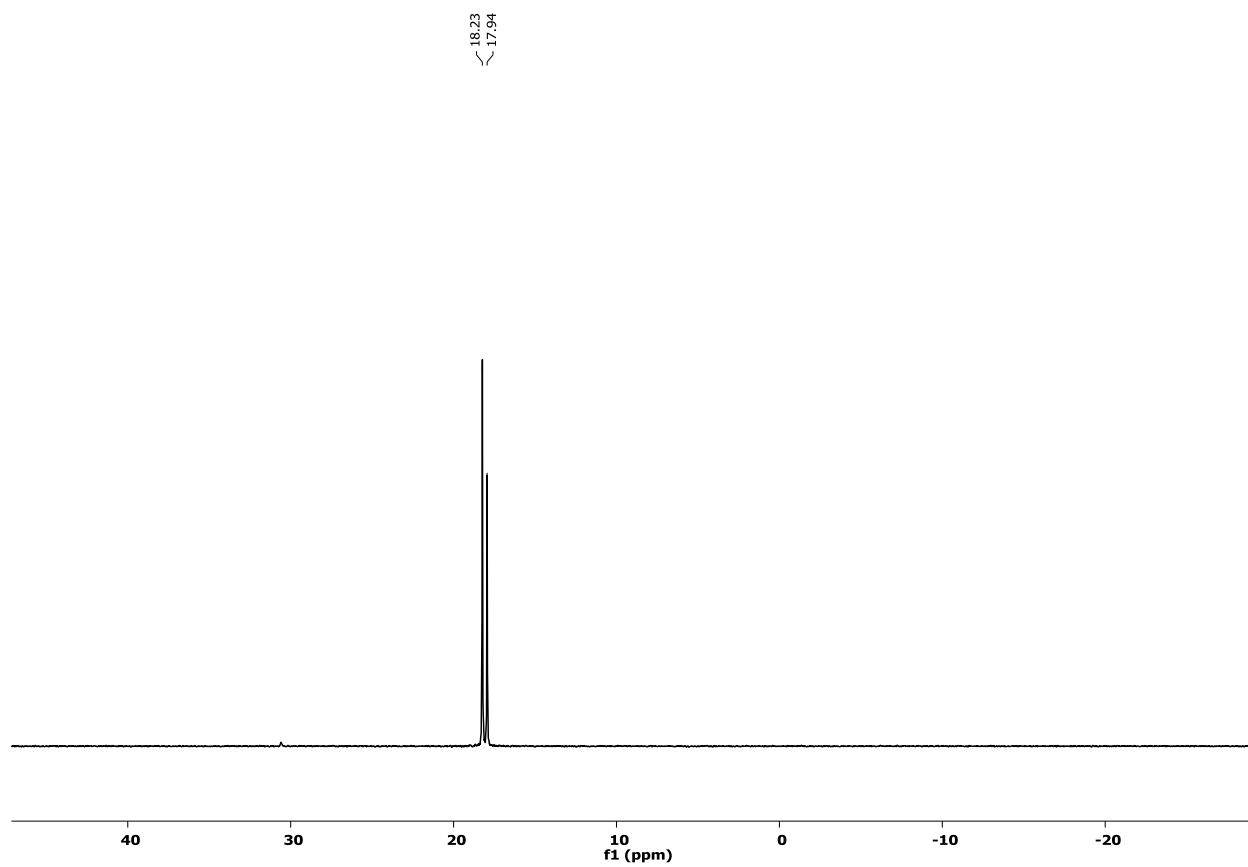

<sup>1</sup>H-NMR of compound **6i**, CDCl<sub>3</sub>, 300 MHz

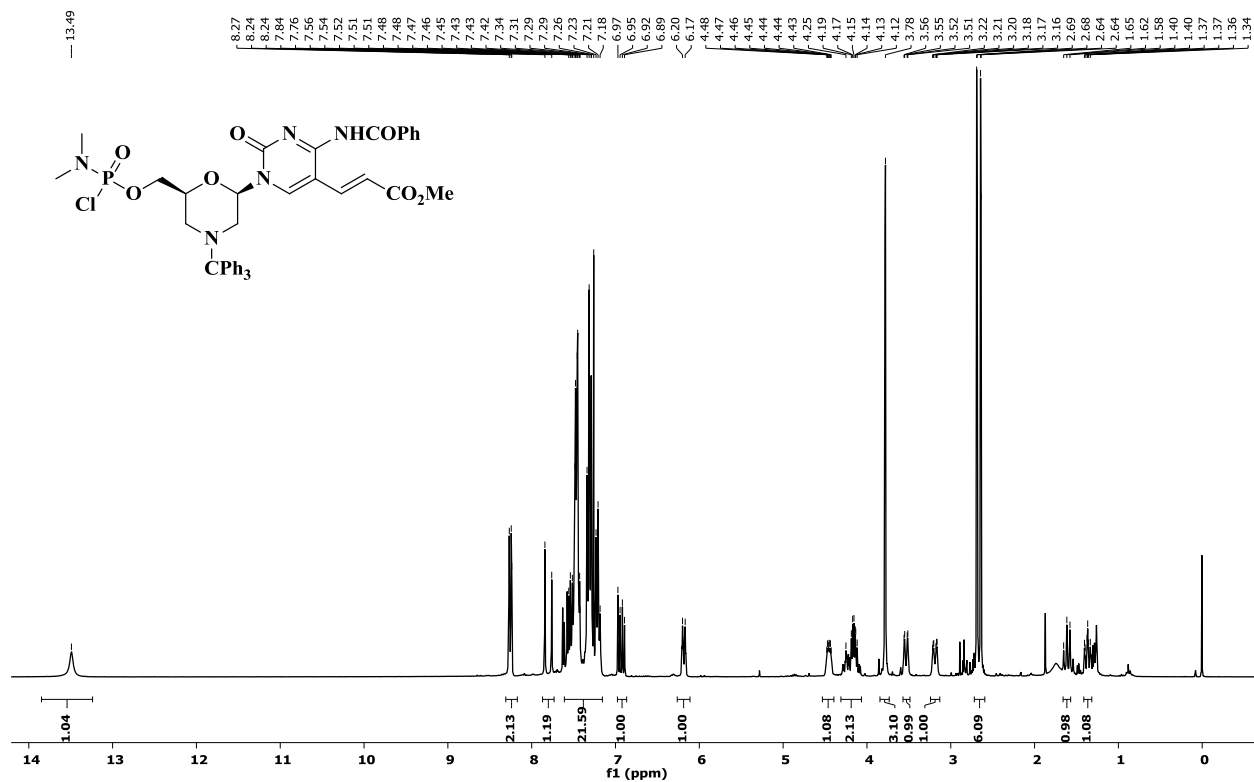

<sup>13</sup>C-NMR of compound **6i**, CDCl<sub>3</sub>, 75 MHz

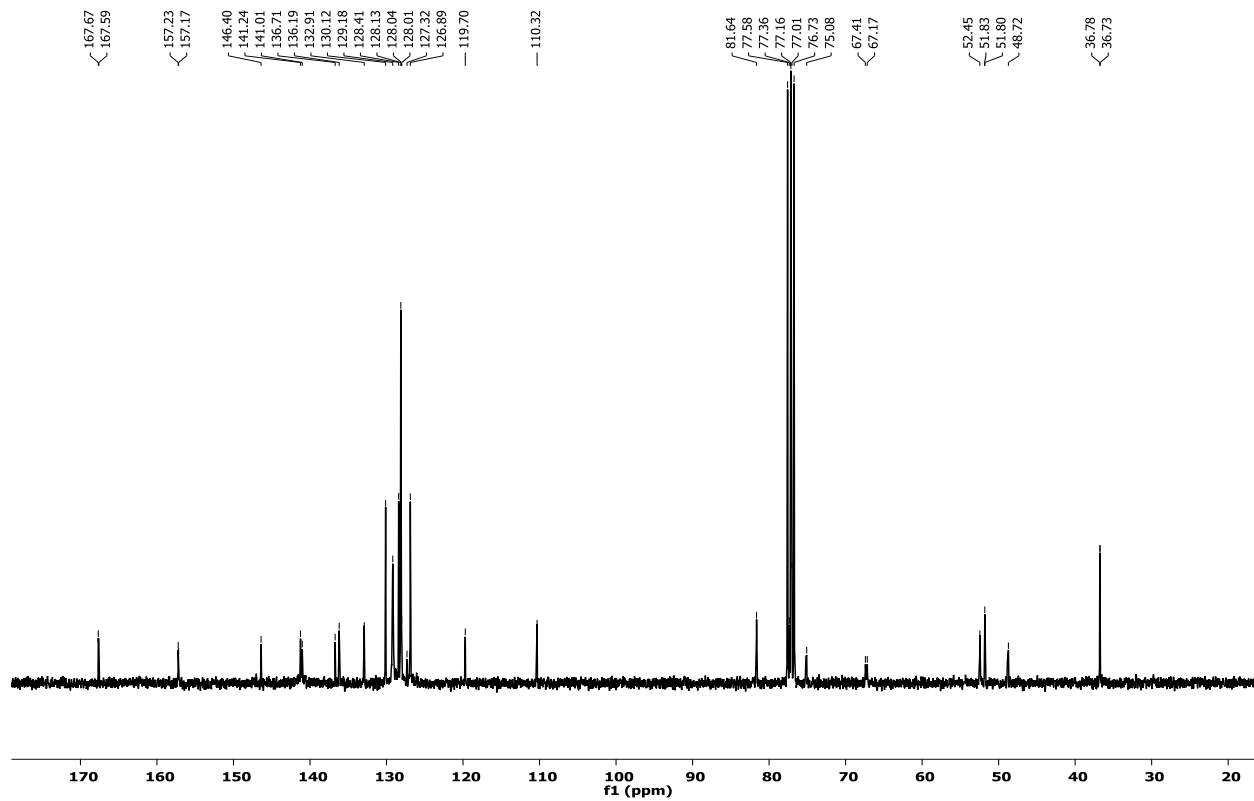



<sup>31</sup>P-NMR of compound **6i**, CDCl<sub>3</sub>, 162 MHz

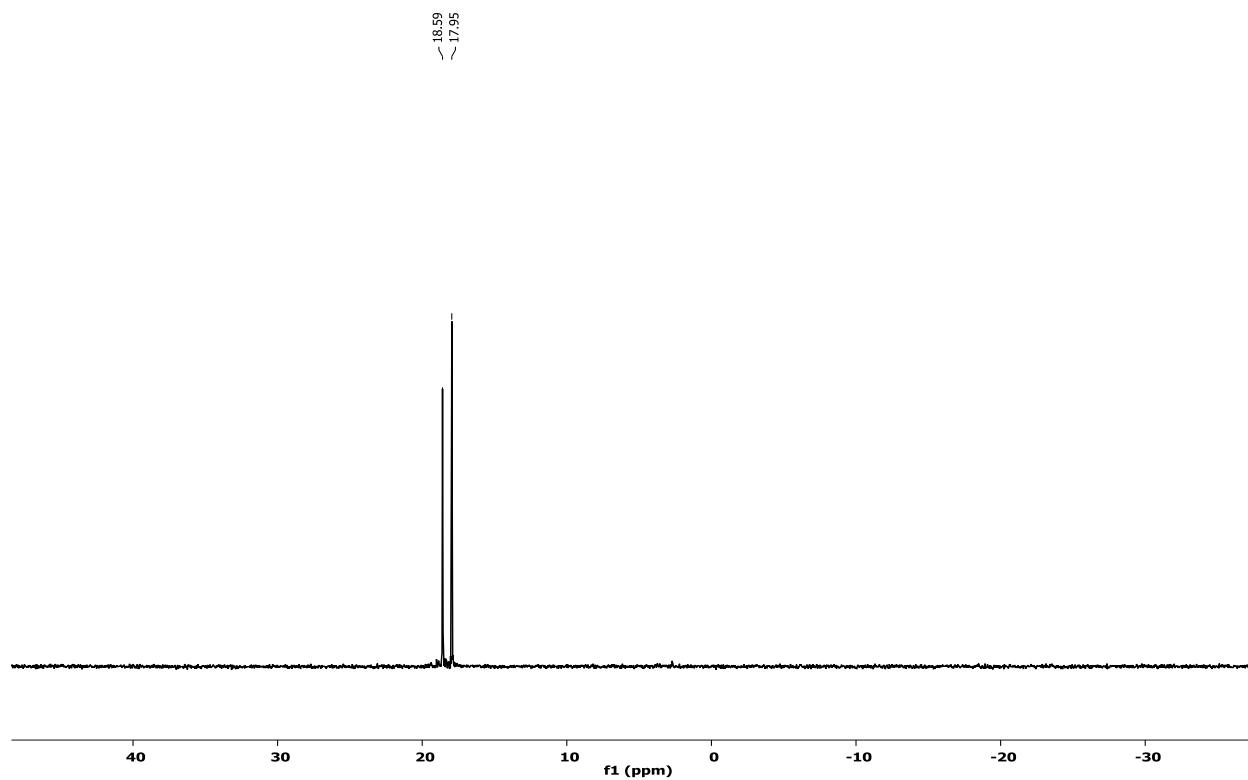

<sup>1</sup>H-NMR of compound **6j**, CDCl<sub>3</sub>, 300 MHz

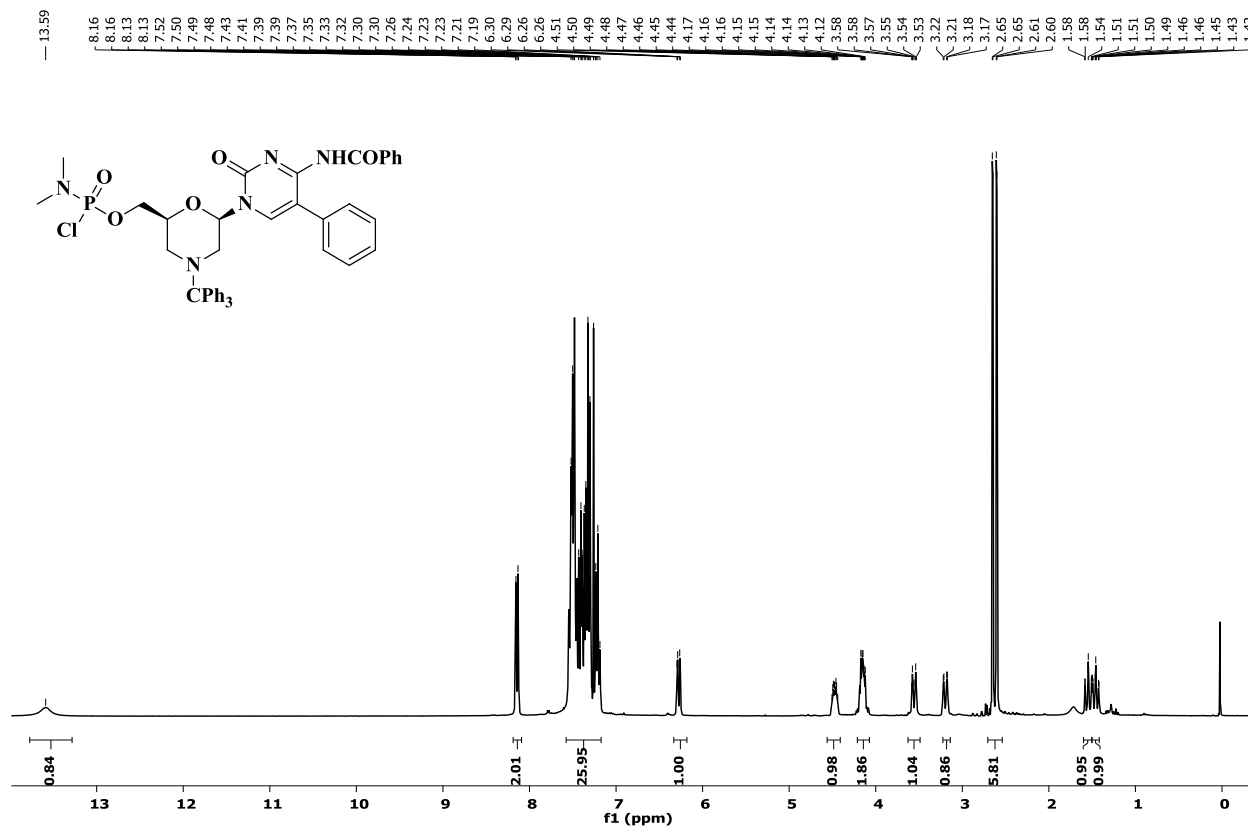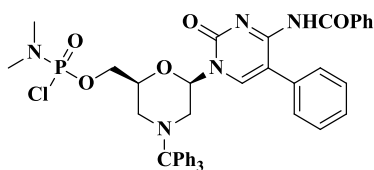

<sup>13</sup>C-NMR of compound **6j**, CDCl<sub>3</sub>, 75 MHz

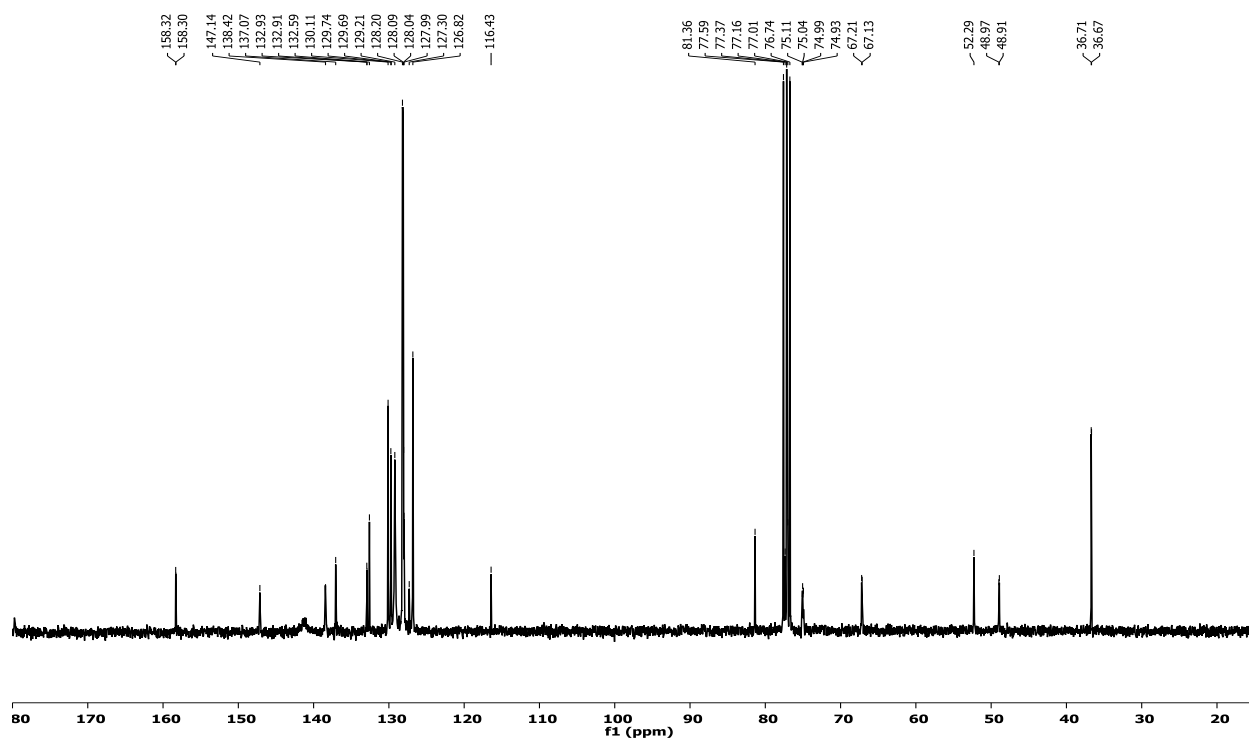

<sup>31</sup>P-NMR of compound **6j**, CDCl<sub>3</sub>, 121 MHz

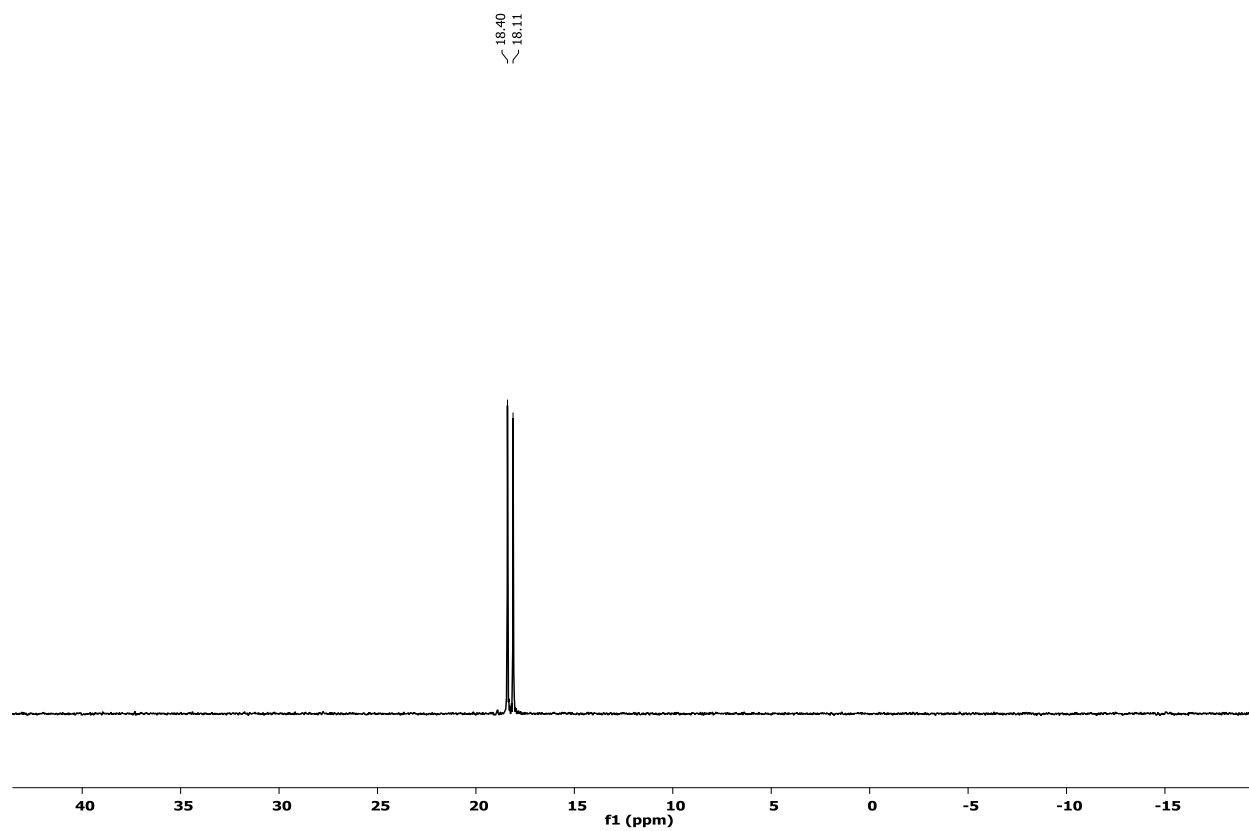

<sup>1</sup>H-NMR of compound **6k**, CDCl<sub>3</sub>, 300 MHz

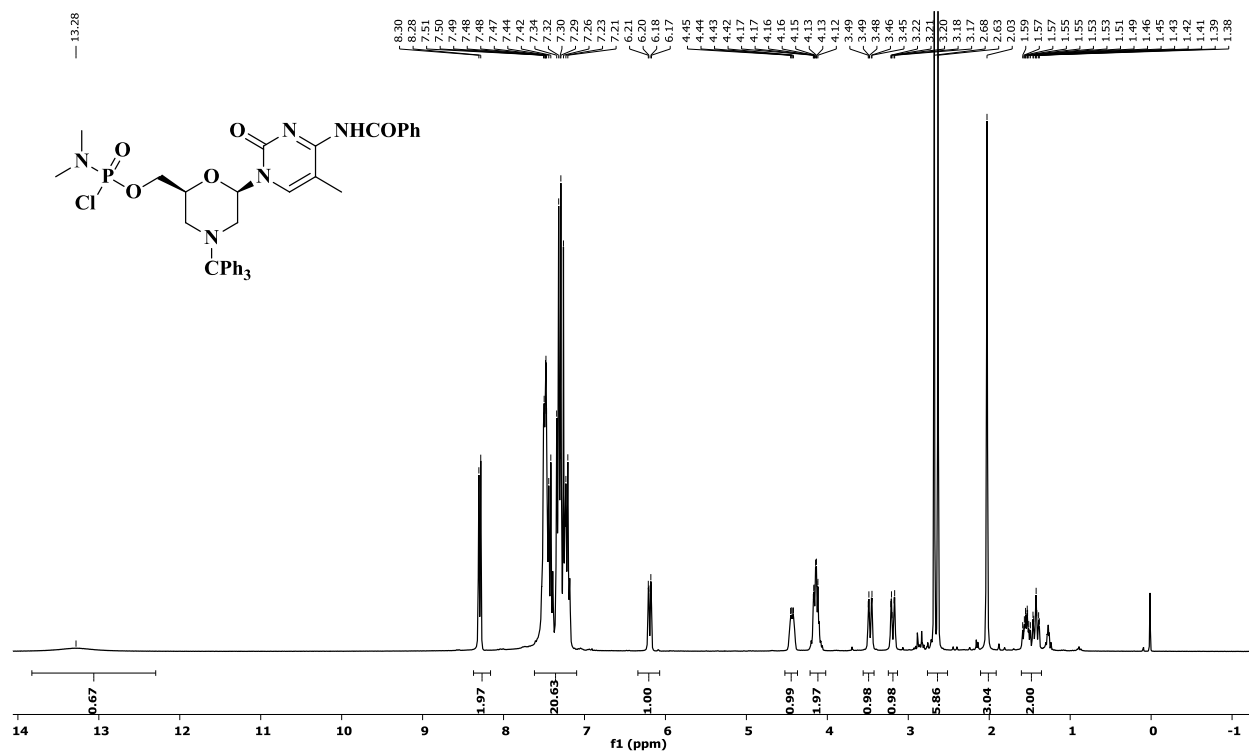

<sup>13</sup>C-NMR of compound **6k**, CDCl<sub>3</sub>, 75 MHz

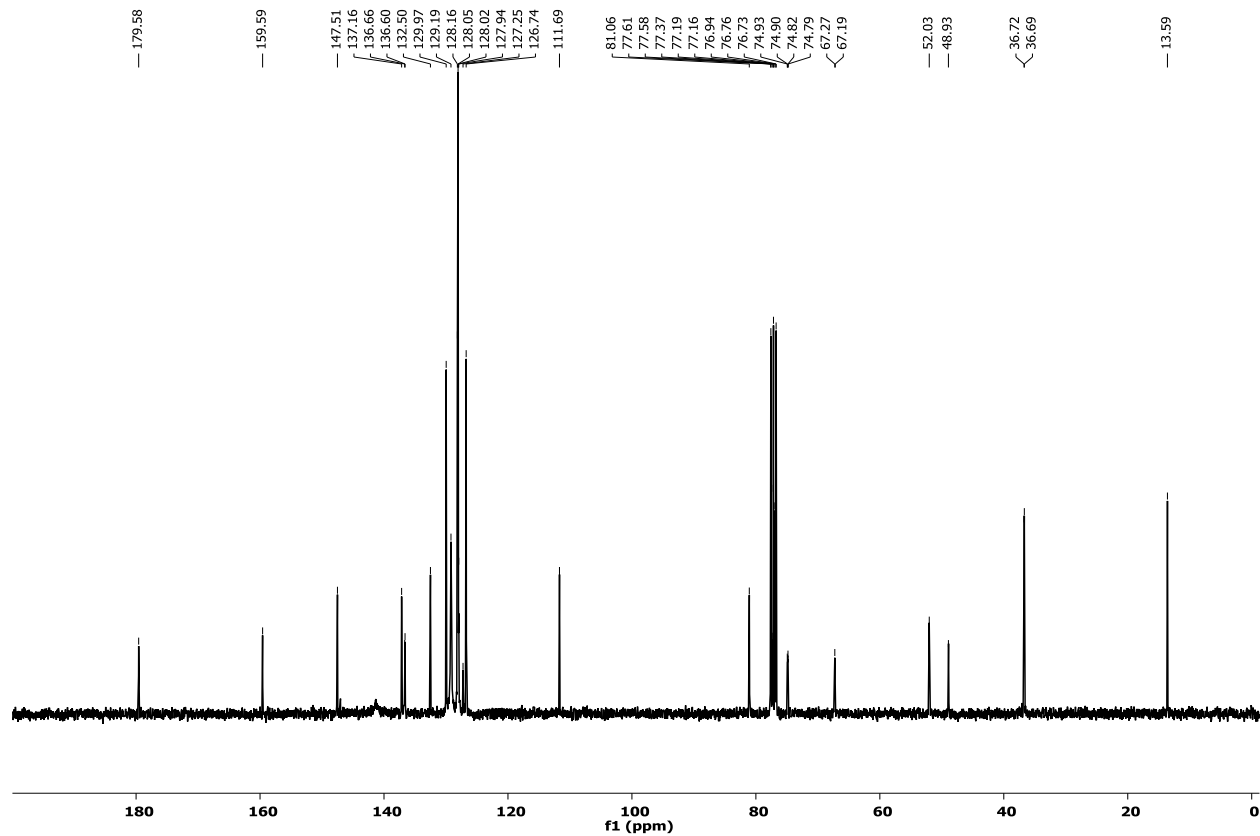

31P-NMR of compound **6k**, CDCl<sub>3</sub>, 121 MHz

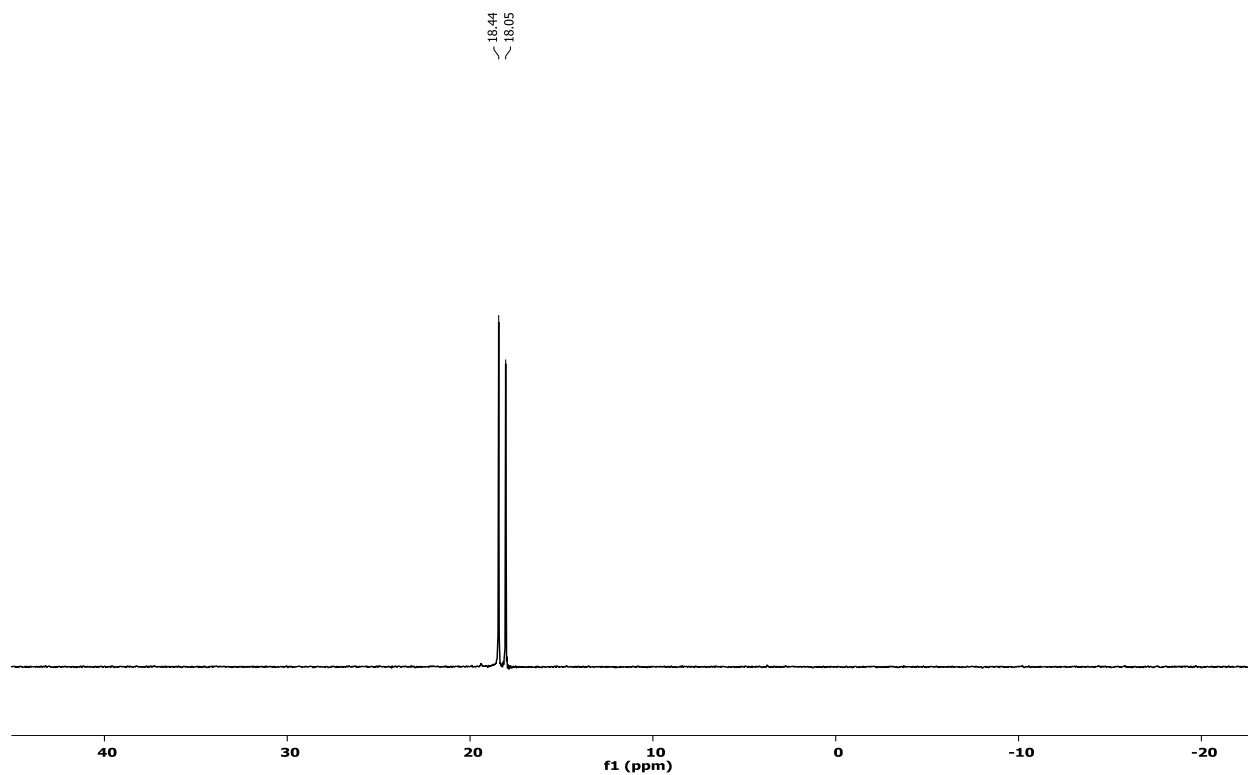

1H-NMR of compound **6l**, CDCl<sub>3</sub>, 300MHz

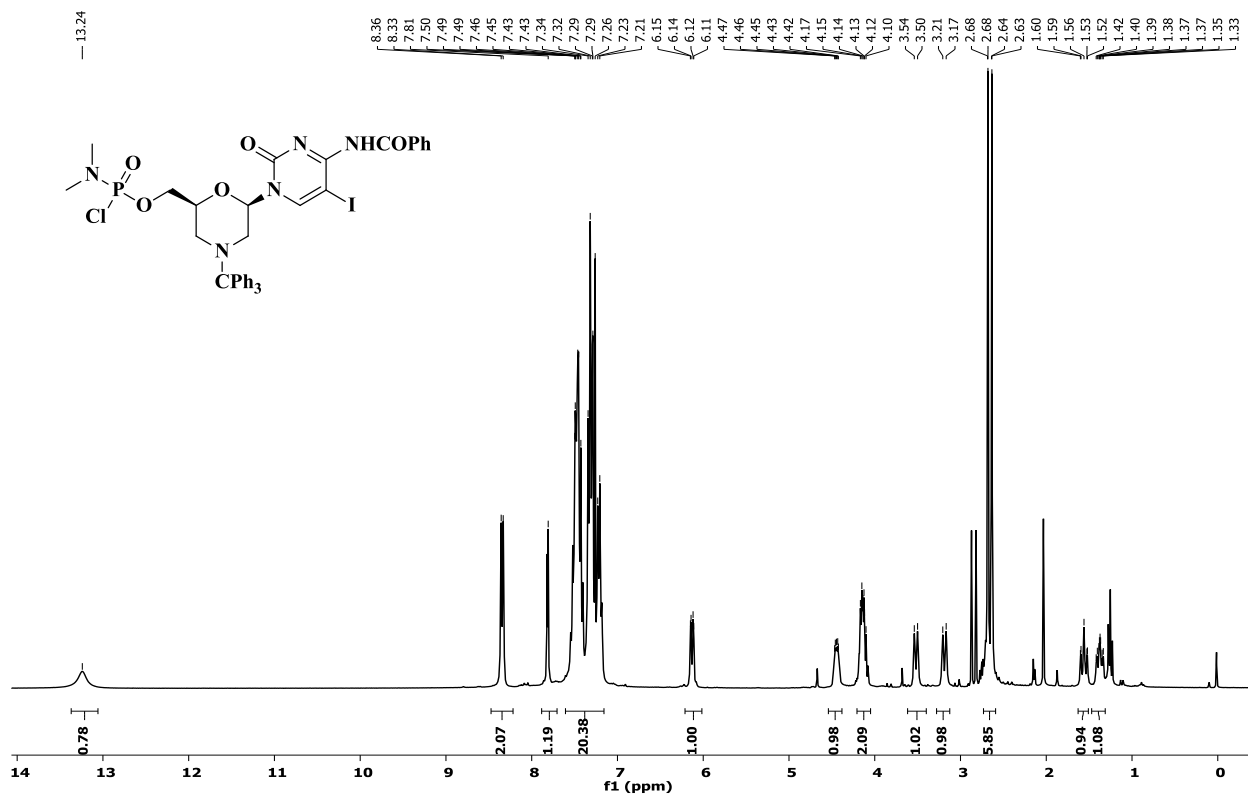

<sup>13</sup>C-NMR of compound **6l**, CDCl<sub>3</sub>, 75 MHz

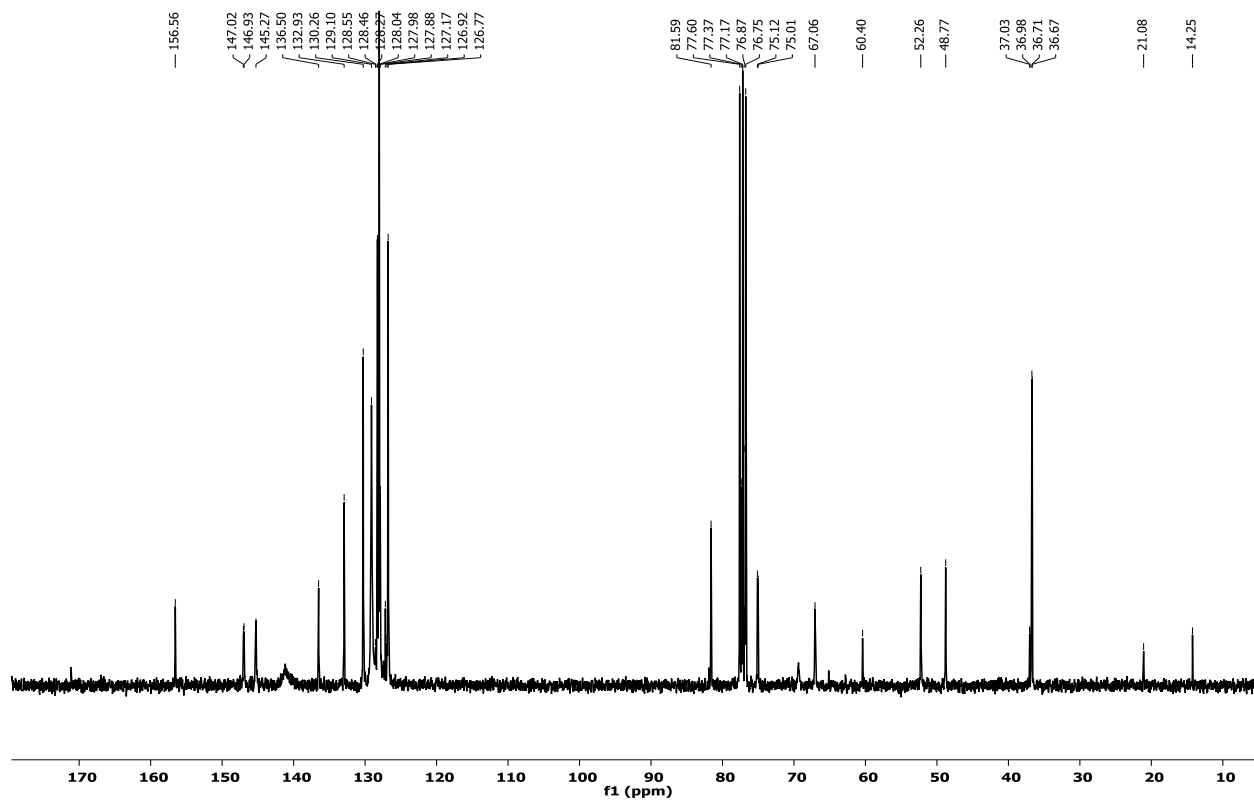

<sup>31</sup>P-NMR of compound **6l**, CDCl<sub>3</sub>, 121 MHz

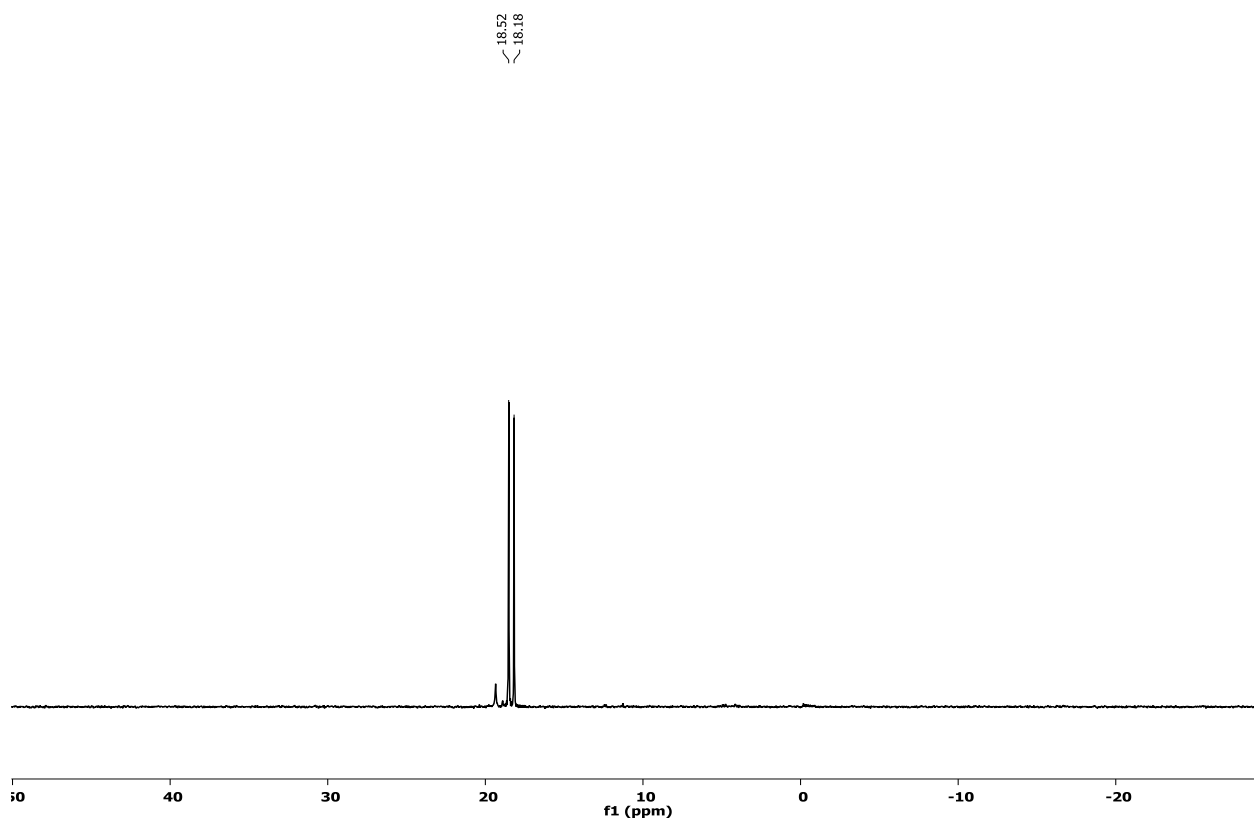

1H-NMR of compound **7a**, CDCl<sub>3</sub>, 300 MHz

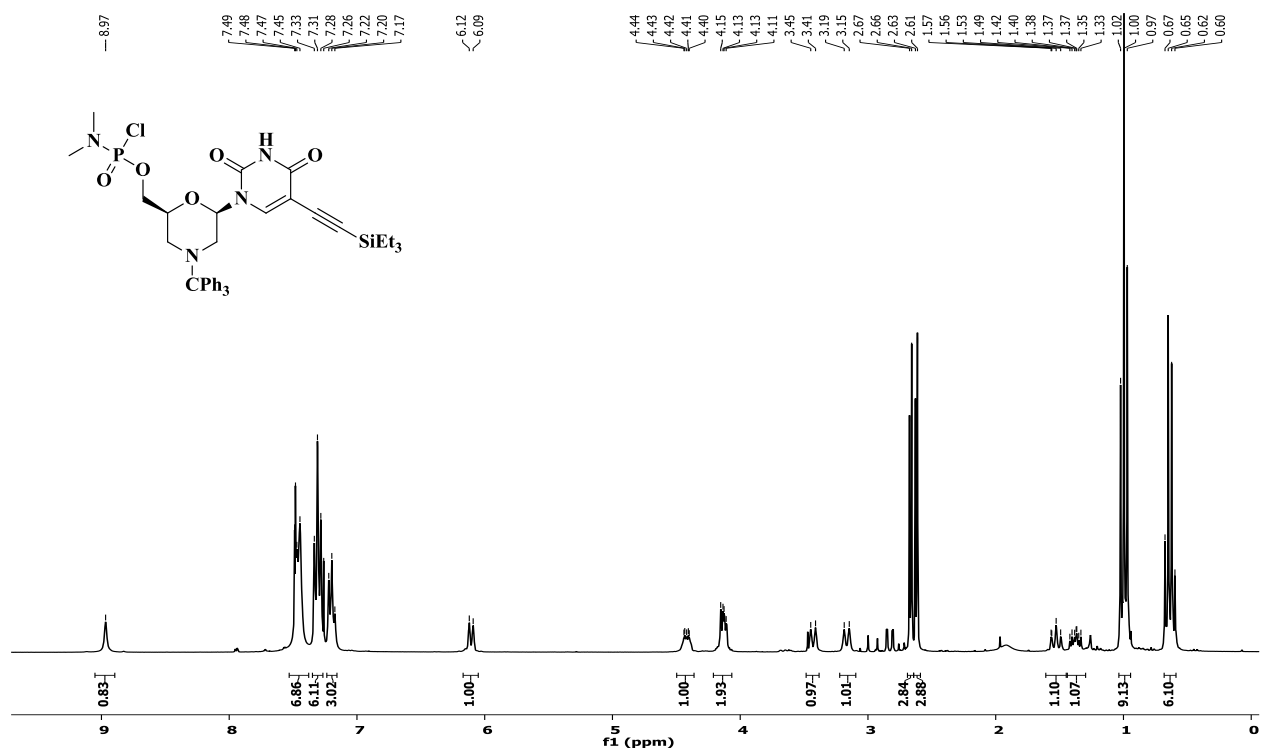

13C-NMR of compound **7a**, CDCl<sub>3</sub>, 100 MHz

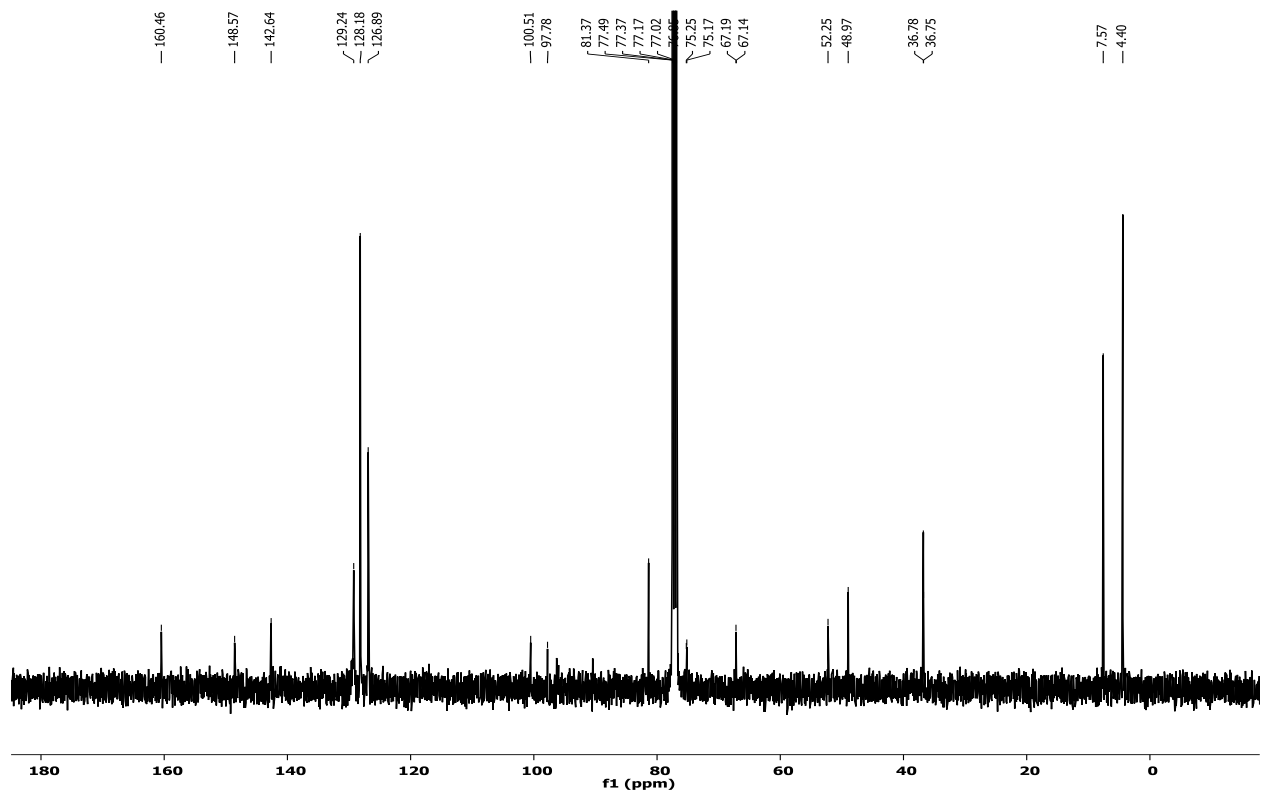

31P-NMR of compound **7a**, CDCl<sub>3</sub>, 121 MHz

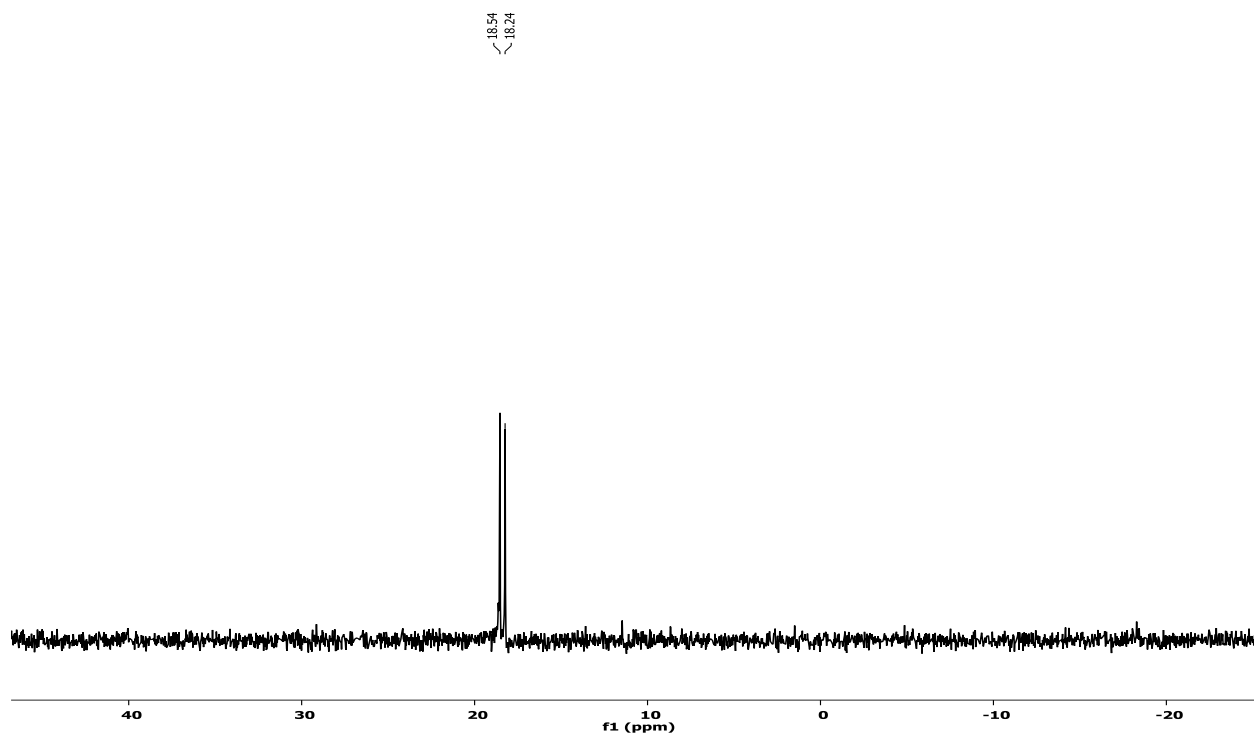

1H-NMR of compound **7b**, CDCl<sub>3</sub>, 300 MHz

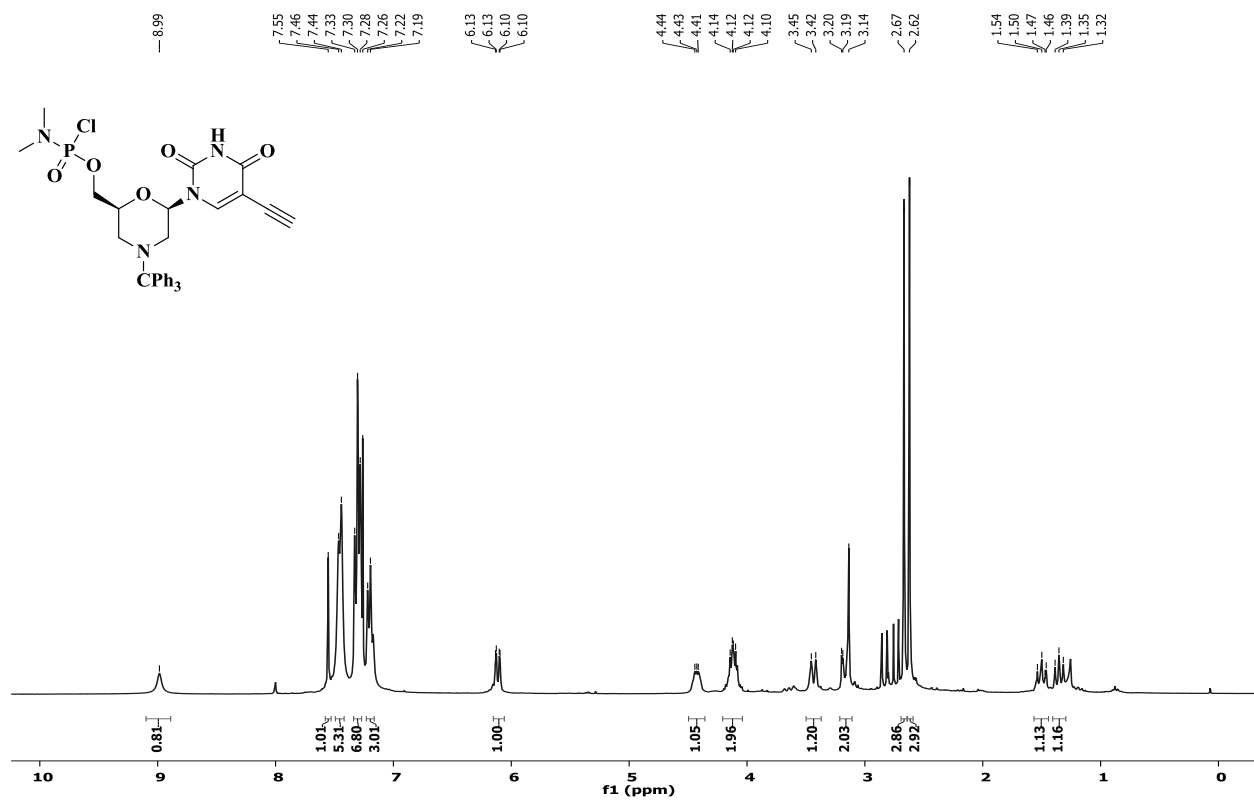

$^{13}\text{C}$ -NMR of compound **7b**,  $\text{CDCl}_3$ , 125 MHz

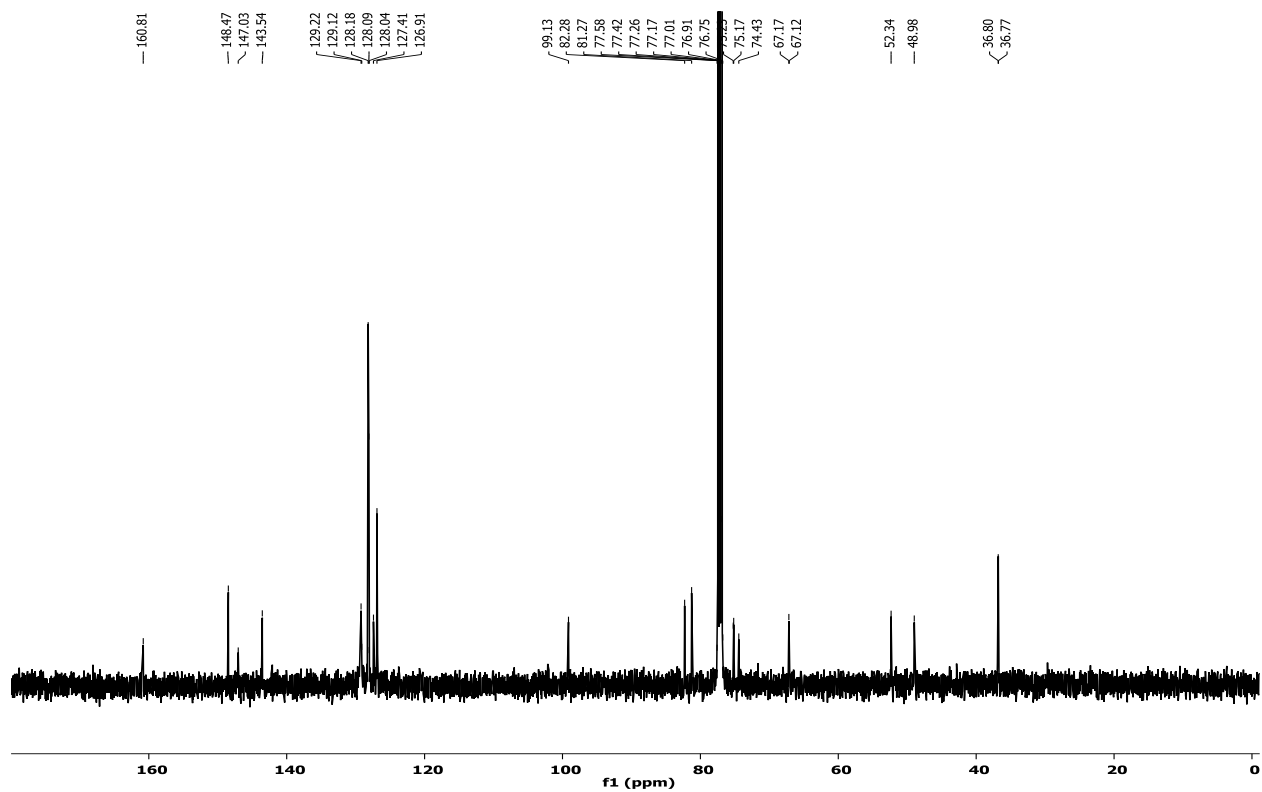

$^{31}\text{P}$ -NMR of compound **7b**,  $\text{CDCl}_3$ , 121 MHz

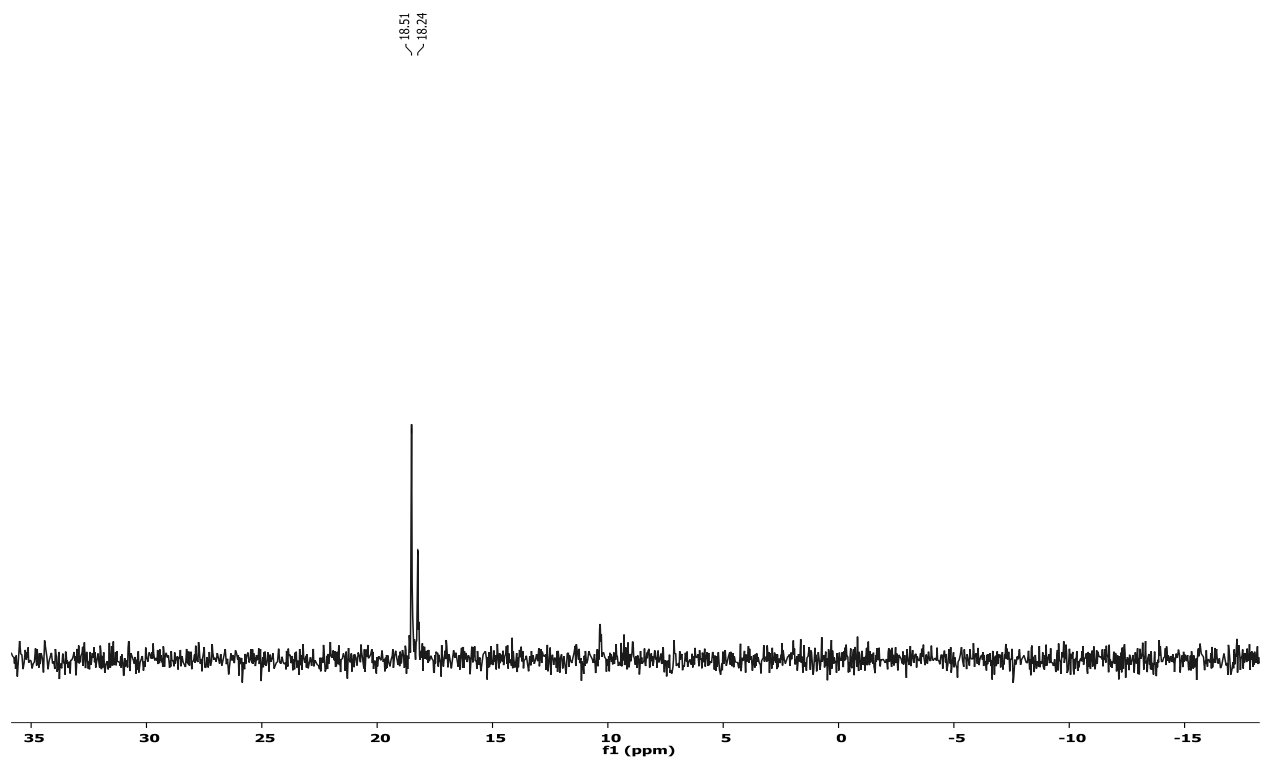



<sup>1</sup>H-NMR of compound **7c**, CDCl<sub>3</sub>, 300 MHz

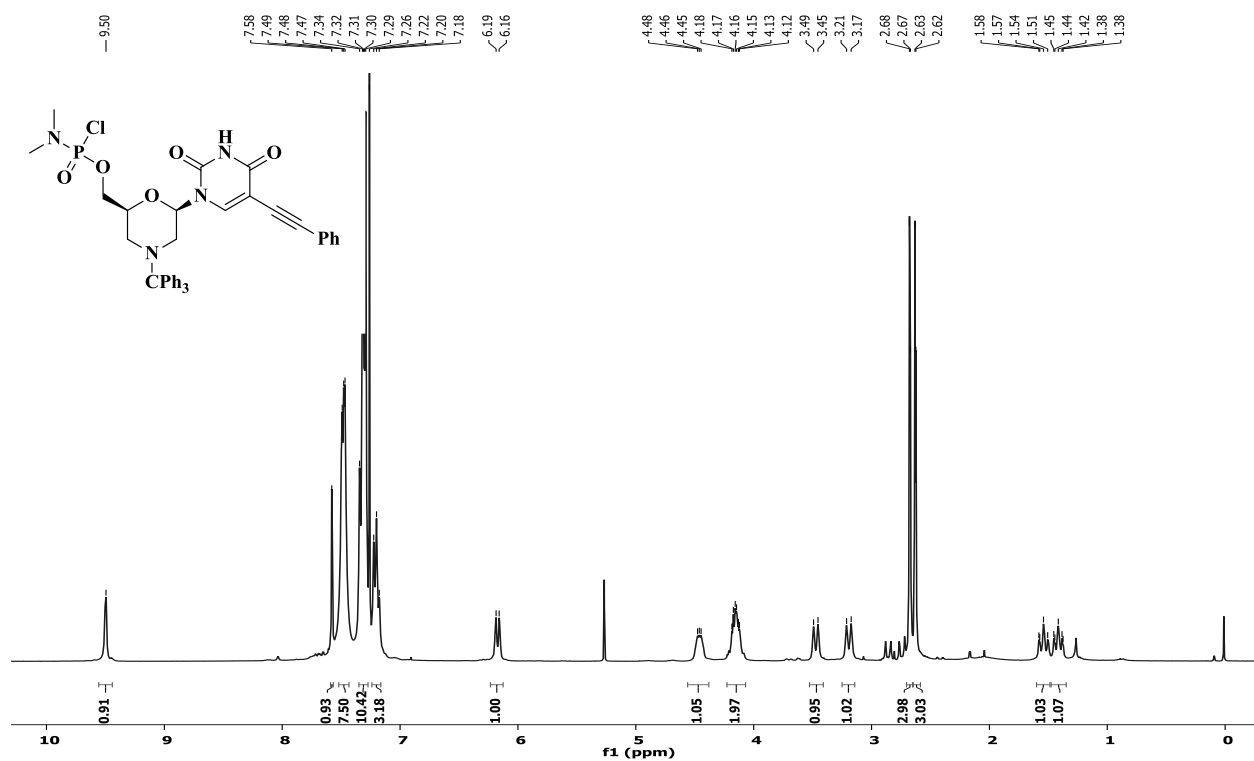

<sup>13</sup>C-NMR of compound **7c**, CDCl<sub>3</sub>, 75 MHz

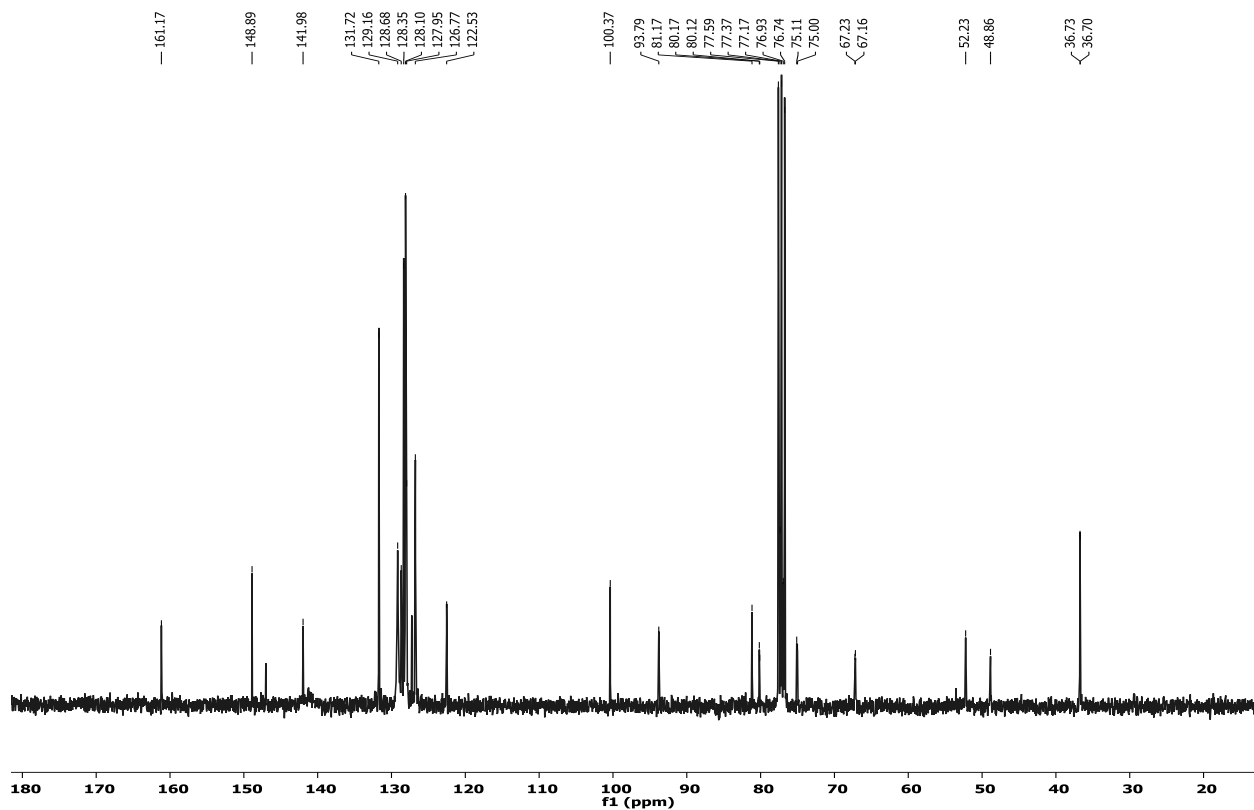

31P-NMR of compound **7c**, CDCl<sub>3</sub>, 121 MHz

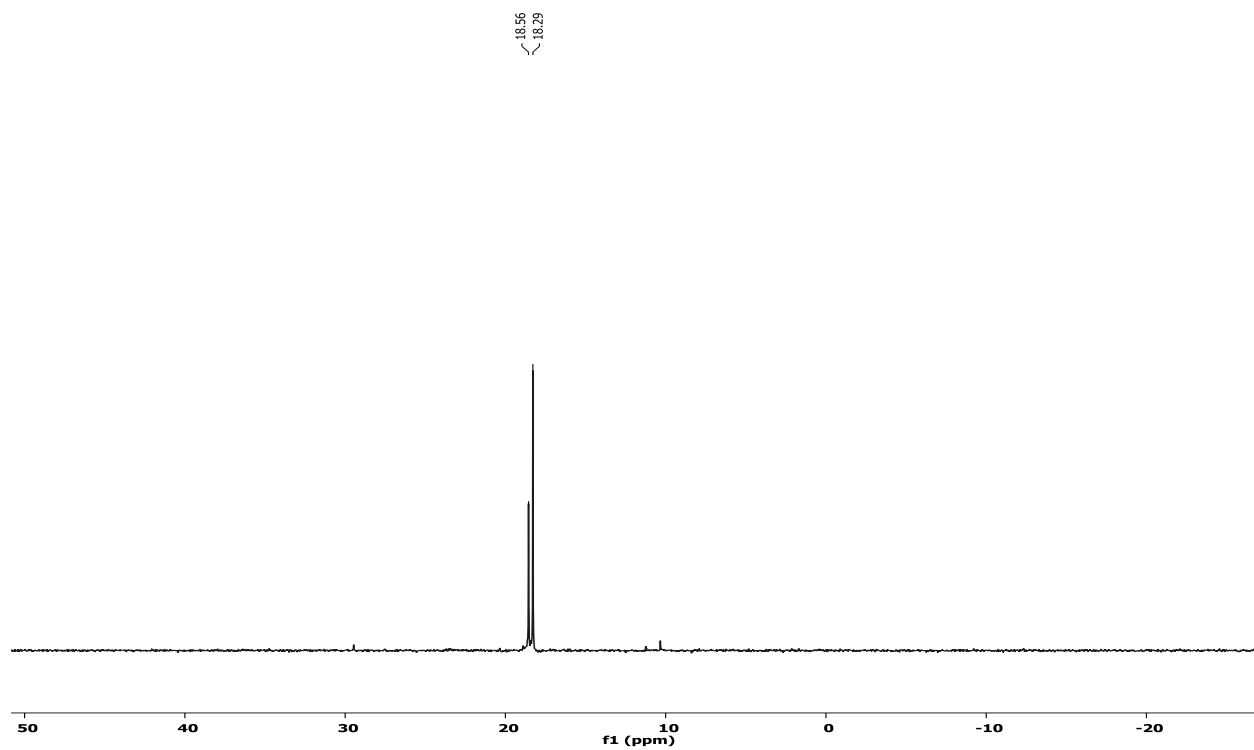

1H-NMR of compound **7d**, CDCl<sub>3</sub>, 300 MHz

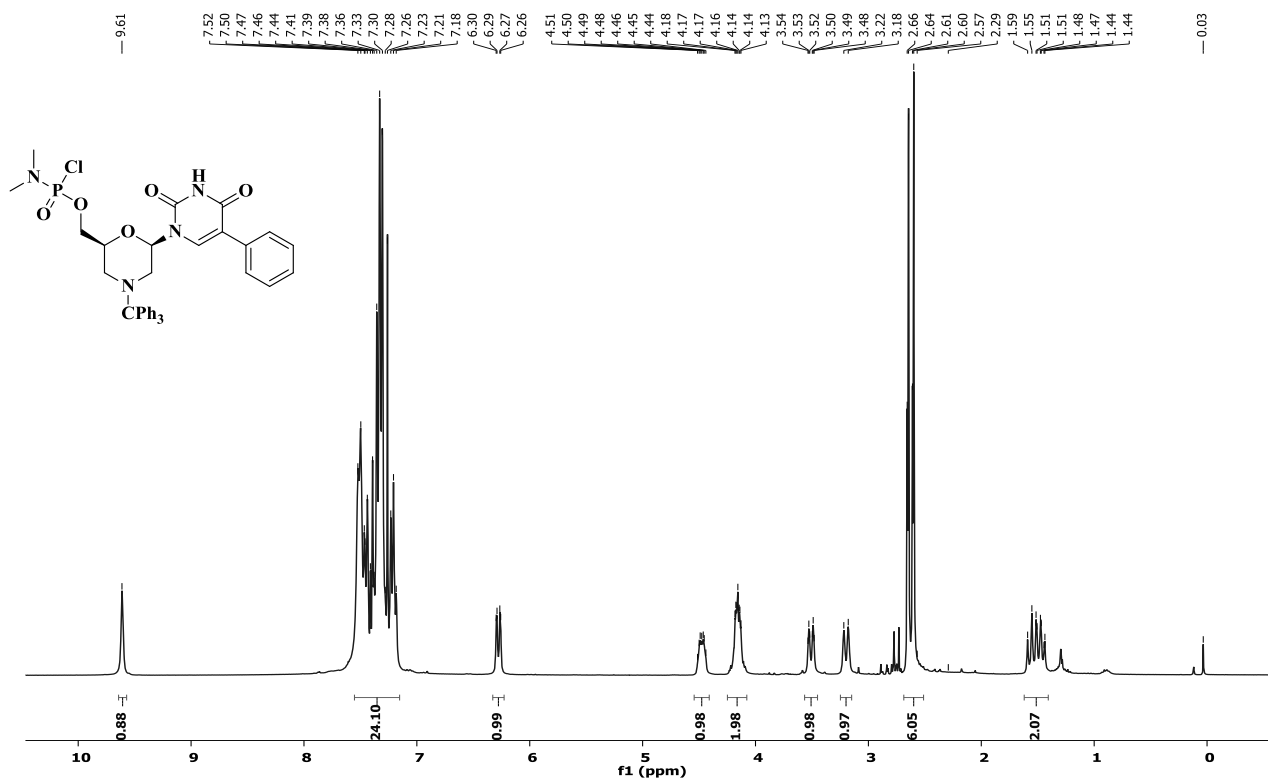

<sup>13</sup>C-NMR of compound **7d**, CDCl<sub>3</sub>, 75 MHz

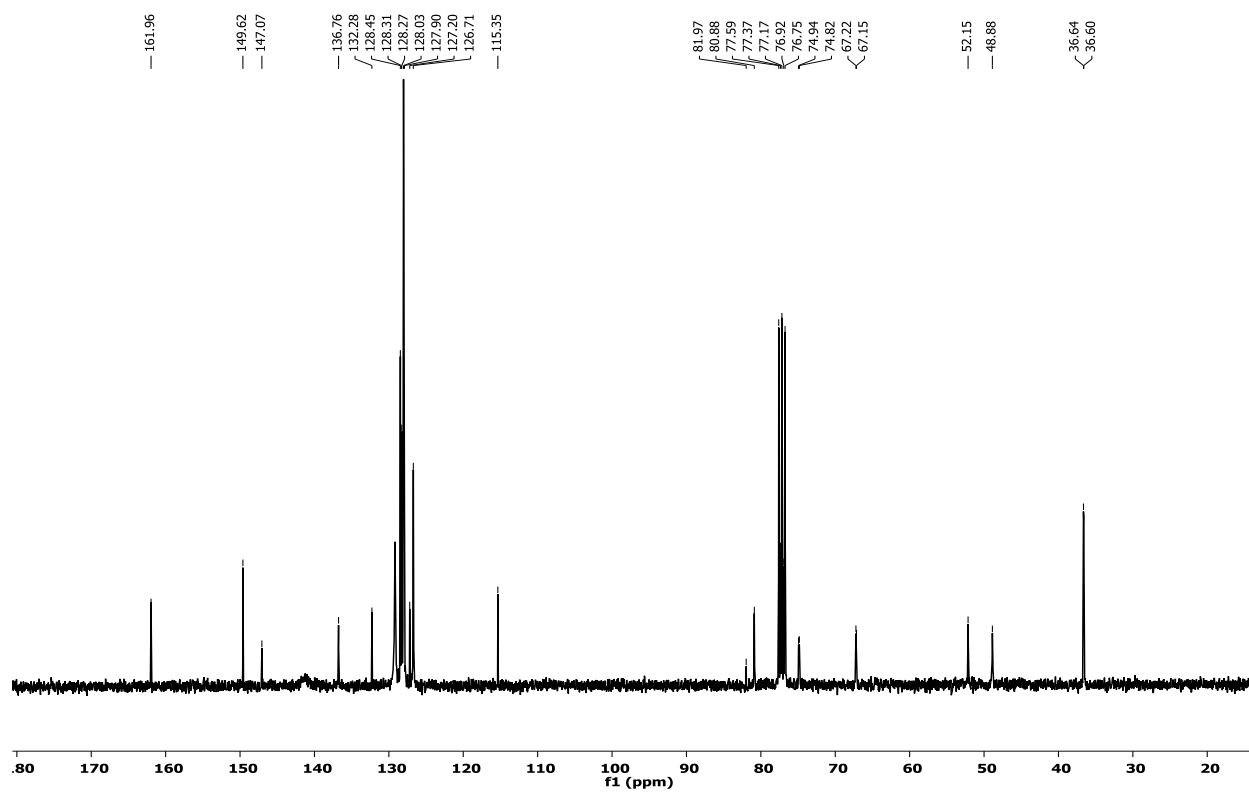

<sup>31</sup>P-NMR of compound **7d**, CDCl<sub>3</sub>, 121 MHz

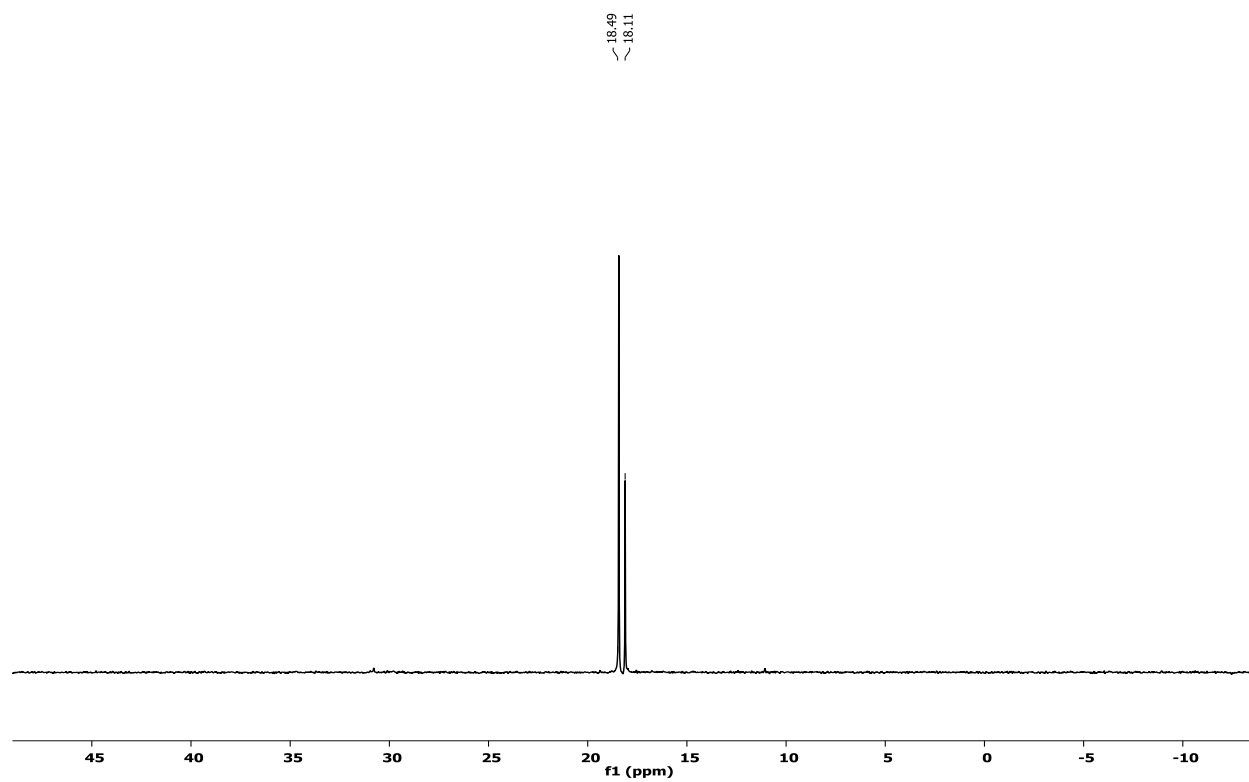

<sup>1</sup>H-NMR of compound **7e**, CDCl<sub>3</sub>, 300 MHz

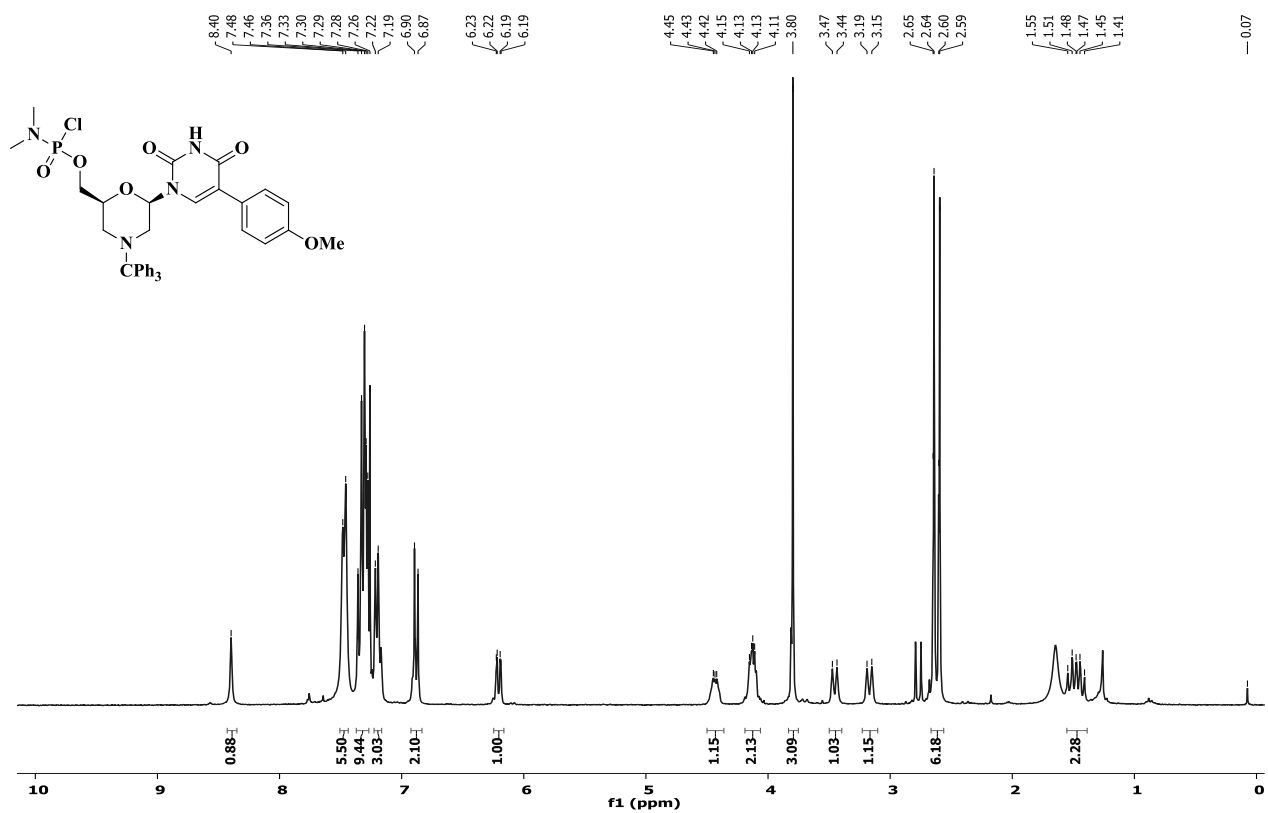

<sup>13</sup>C-NMR of compound **7e**, CDCl<sub>3</sub>, 75 MHz

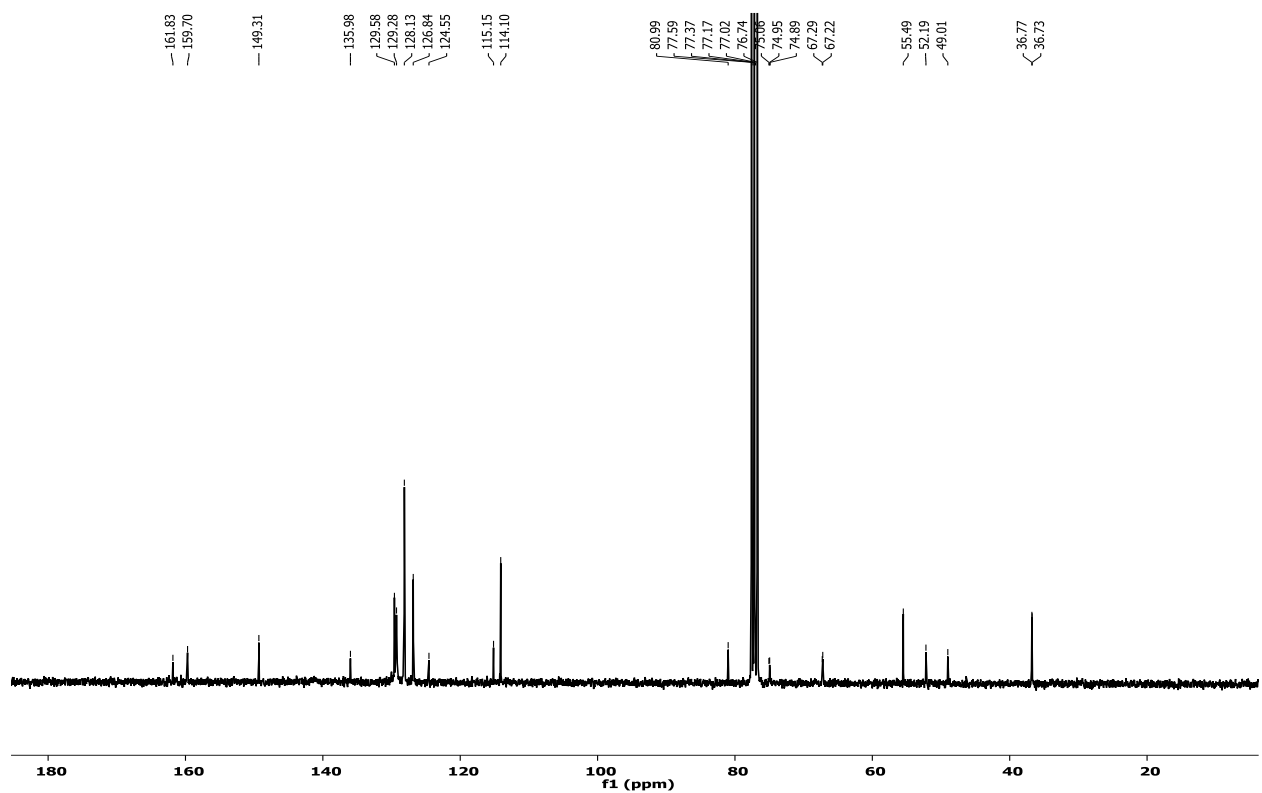

31P-NMR of compound **7e**, CDCl<sub>3</sub>, 121 MHz

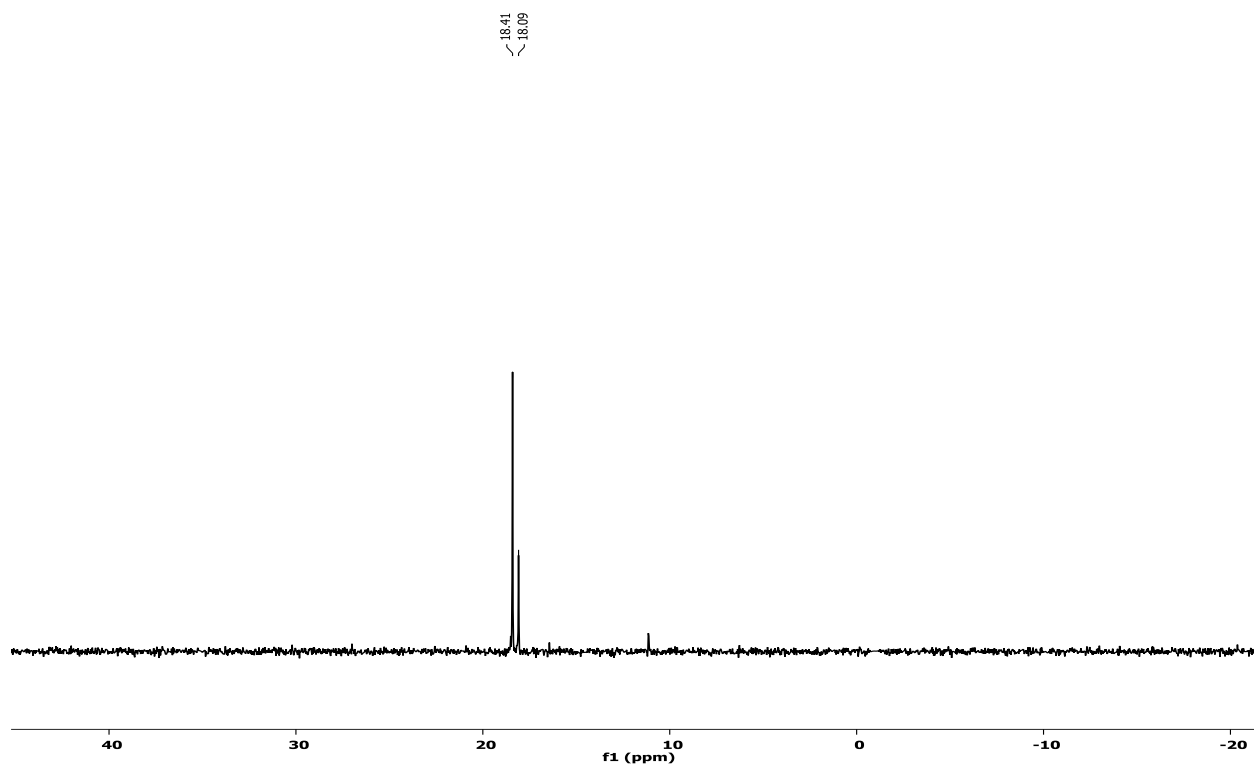

<sup>1</sup>H-NMR of compound **7f**, CDCl<sub>3</sub>, 300 MHz

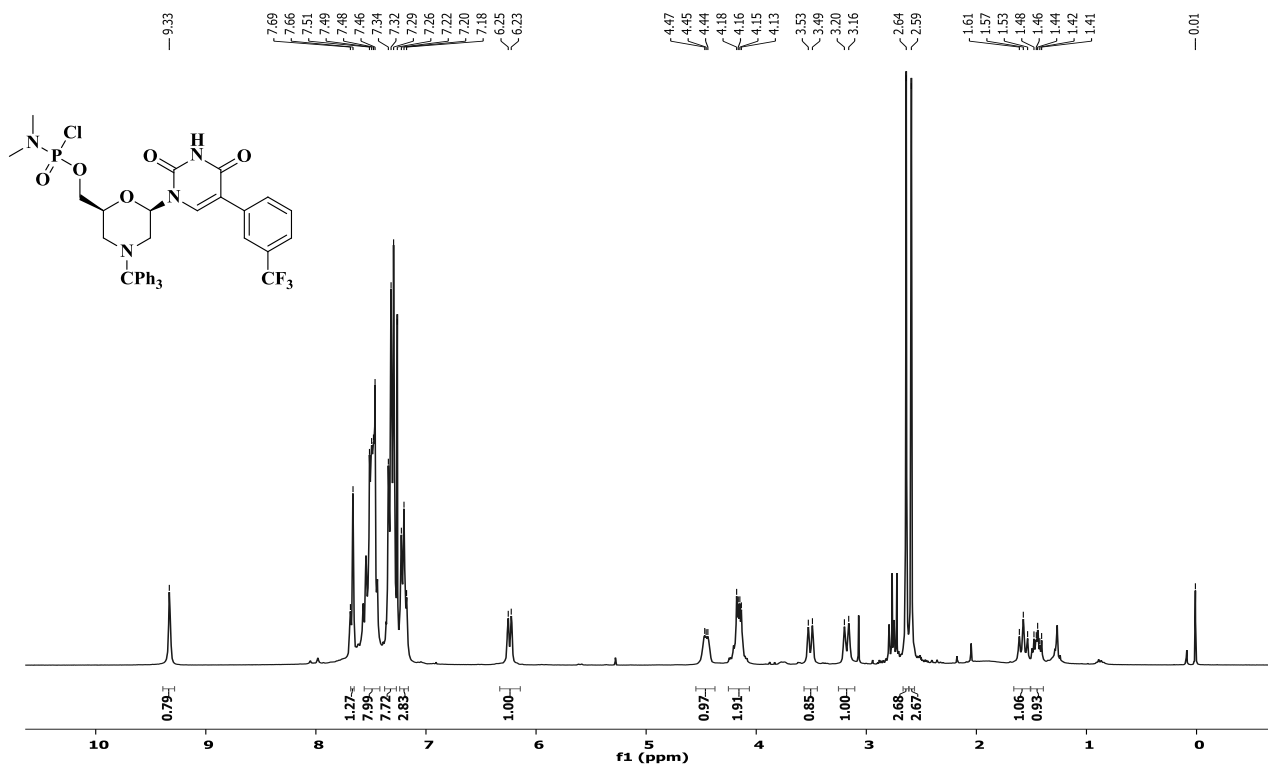

<sup>13</sup>C-NMR of compound **7f**, CDCl<sub>3</sub>, 75 MHz

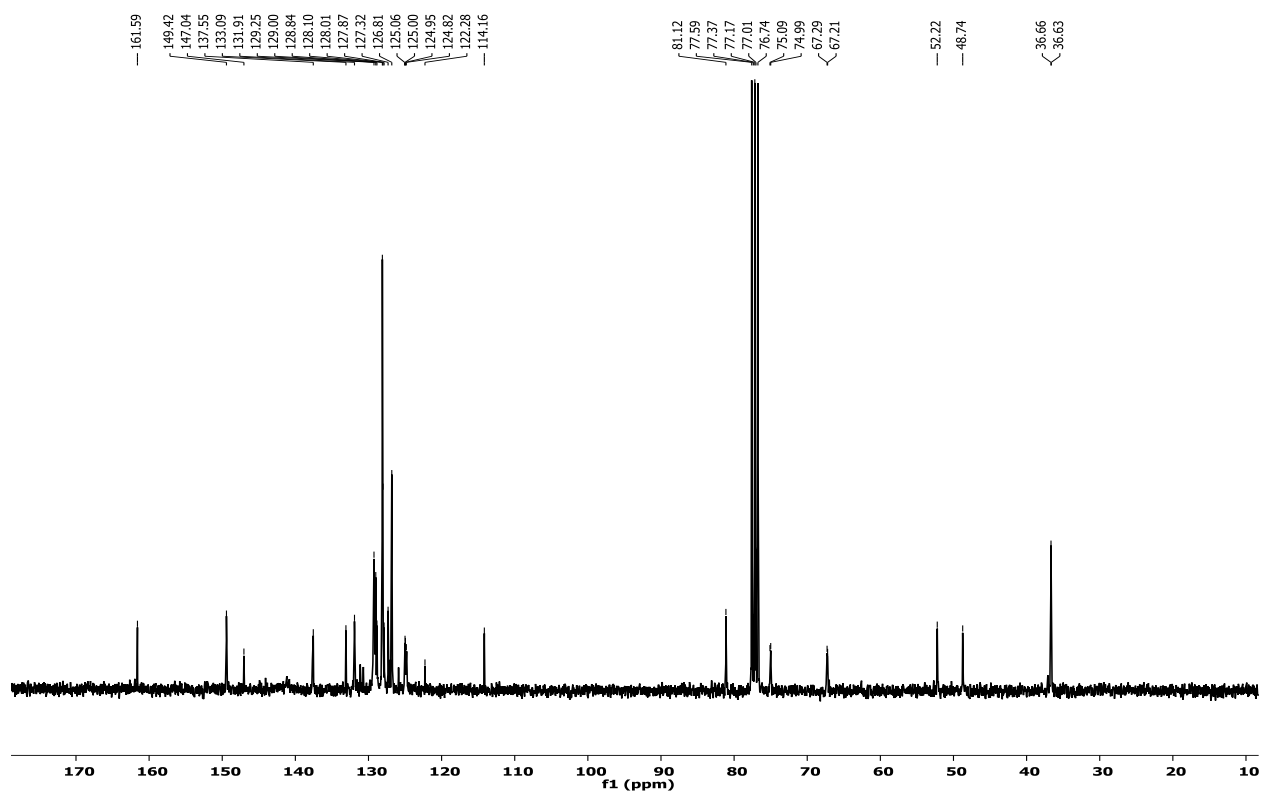

<sup>31</sup>P-NMR of compound **7f**, CDCl<sub>3</sub>, 121 MHz

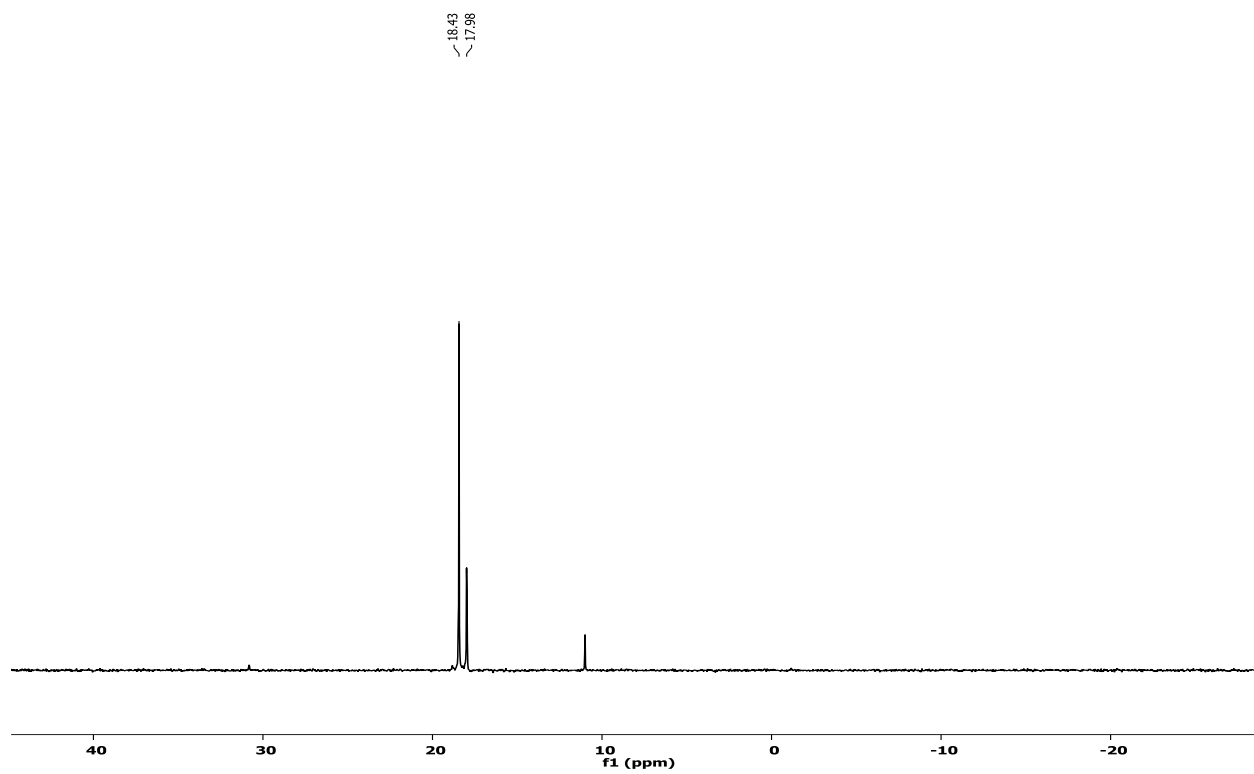

<sup>1</sup>H-NMR of compound **7g**, CDCl<sub>3</sub>, 300 MHz

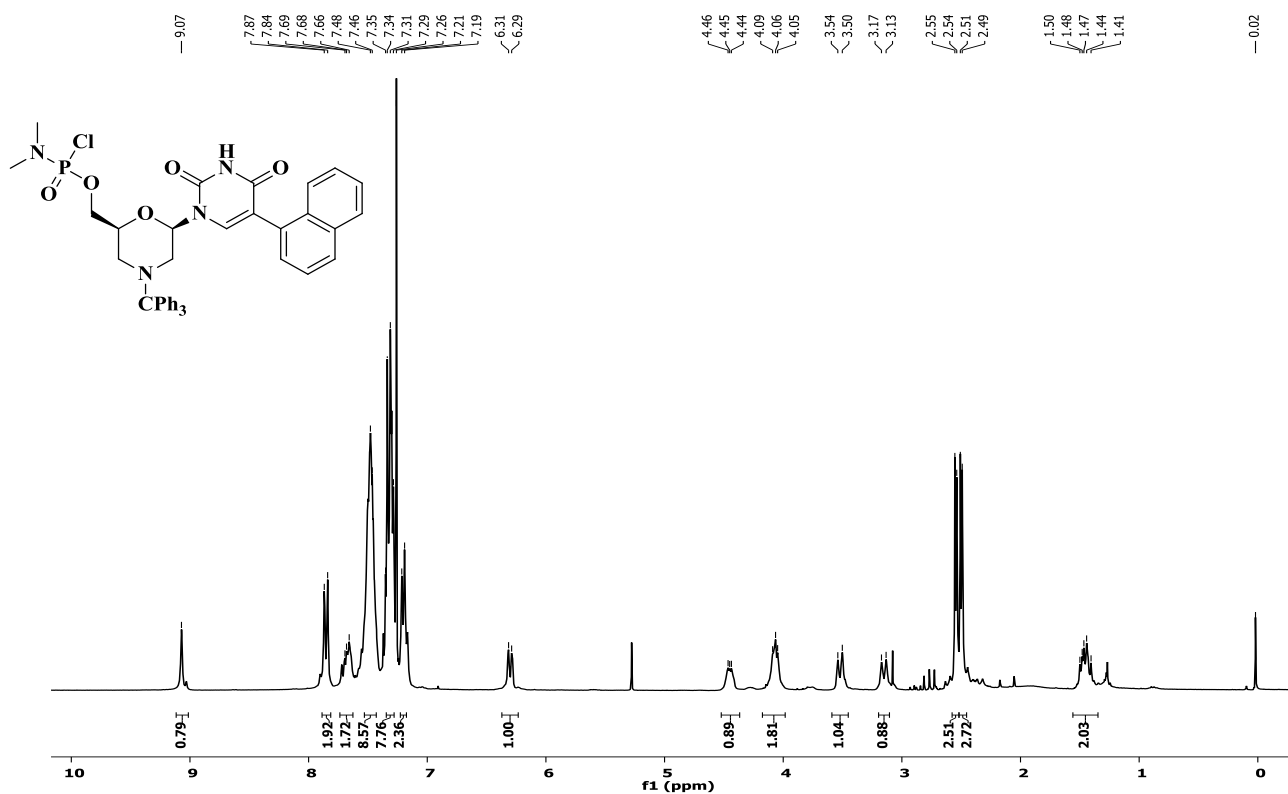

<sup>13</sup>C-NMR of compound **7g**, CDCl<sub>3</sub>, 75 MHz

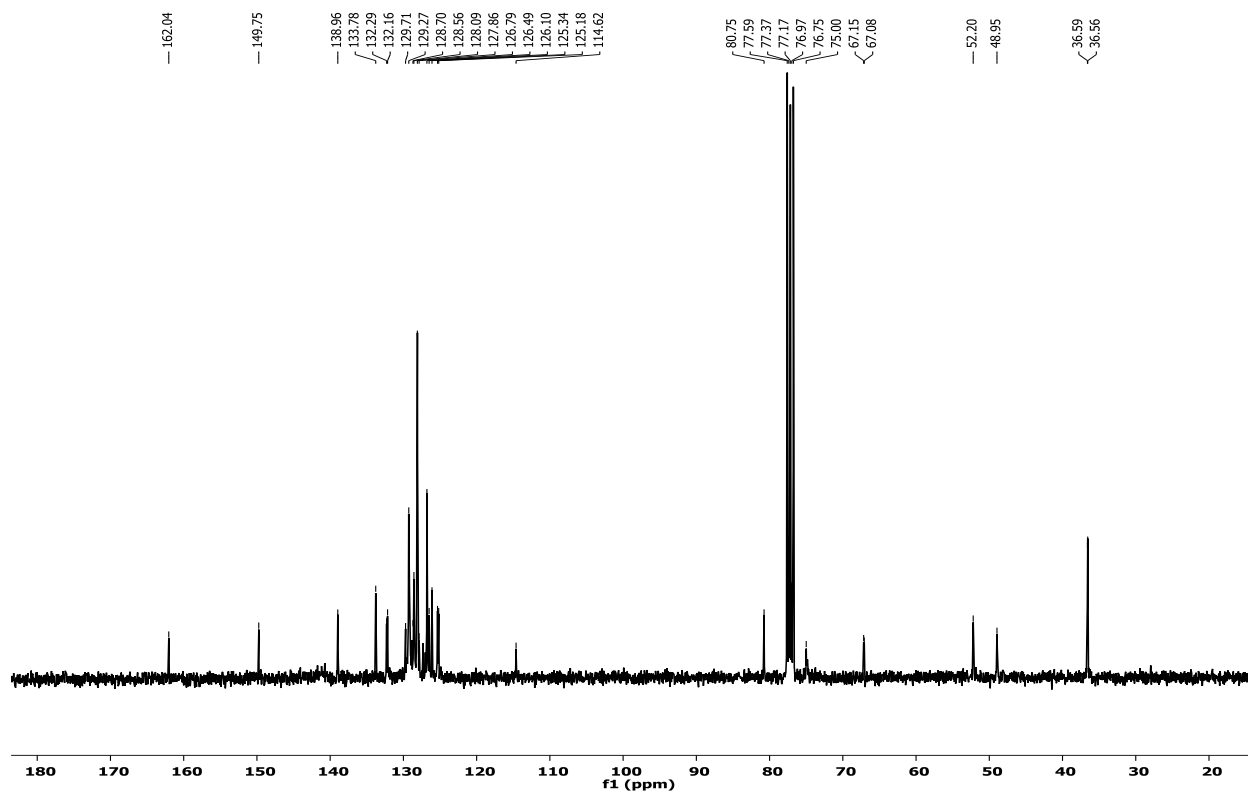

31P-NMR of compound **7g**, CDCl<sub>3</sub>, 121 MHz

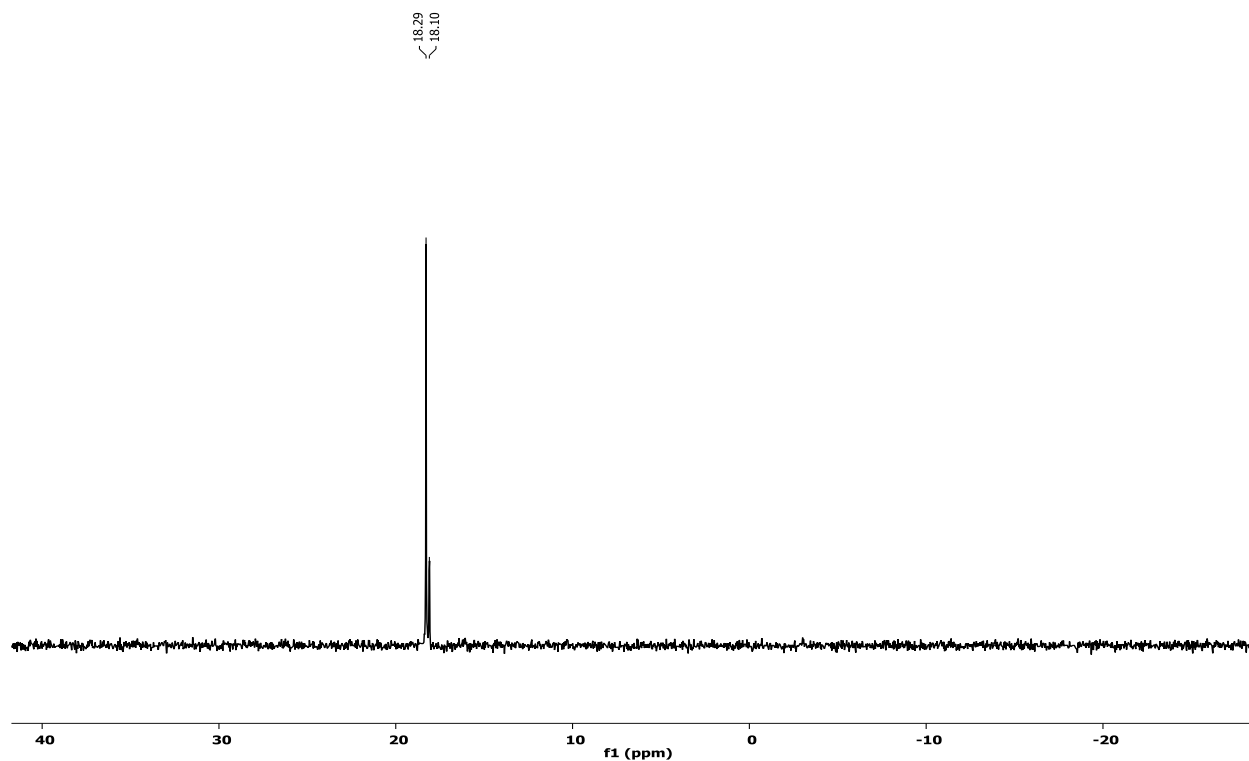

1H-NMR of compound **7h**, CDCl<sub>3</sub>, 300 MHz

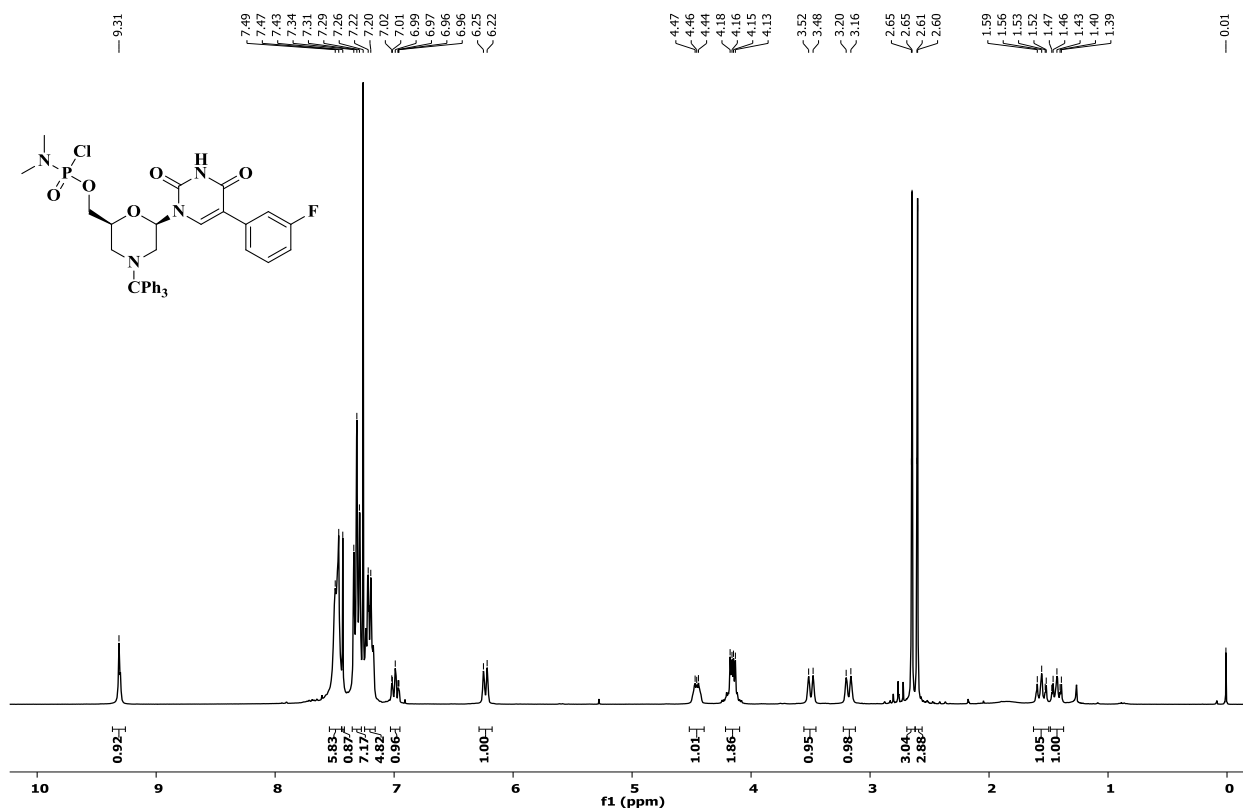



<sup>13</sup>C-NMR of compound **7h**, CDCl<sub>3</sub>, 75 MHz

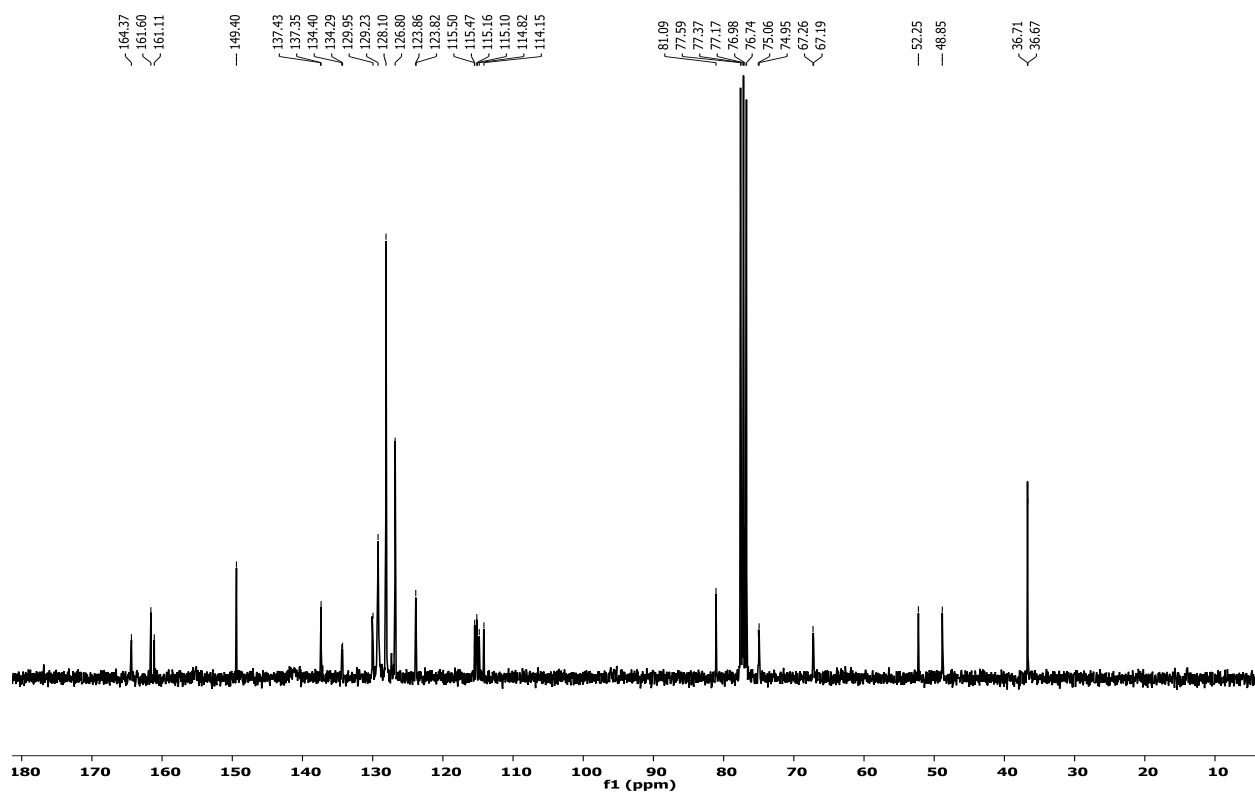

<sup>31</sup>P-NMR of compound **7h**, CDCl<sub>3</sub>, 121 MHz

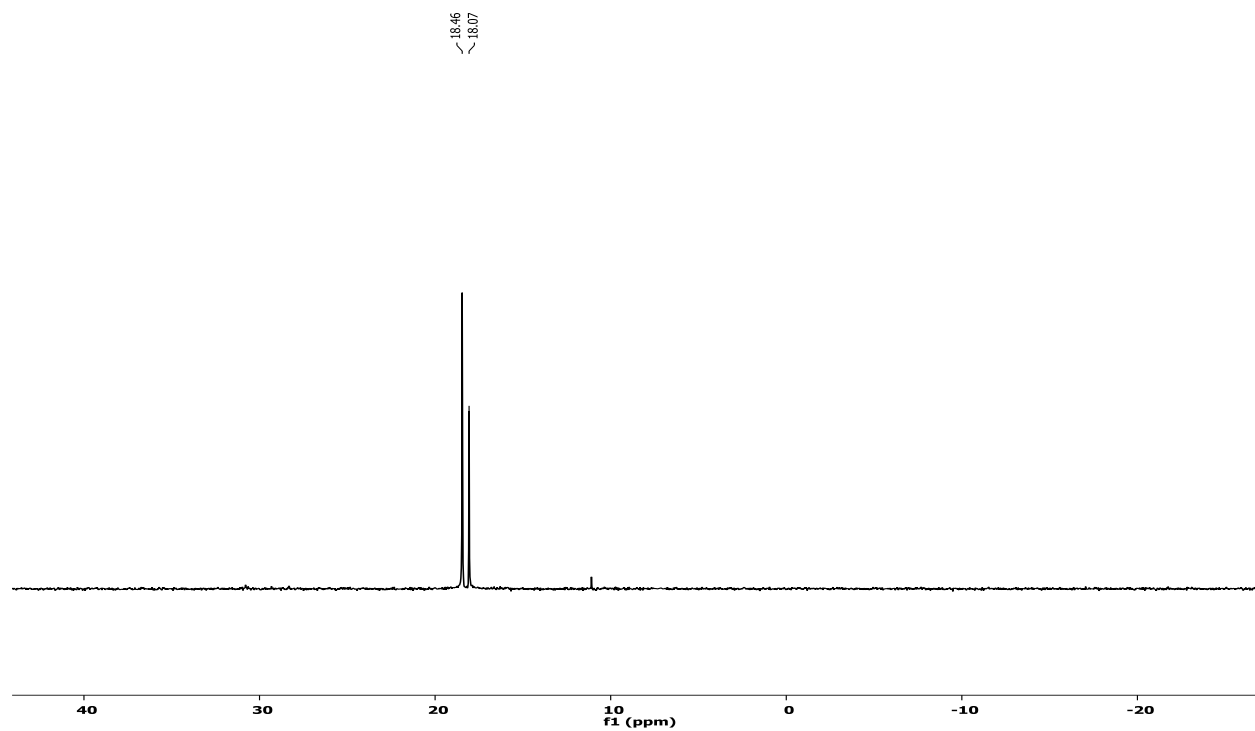

<sup>1</sup>H-NMR of compound **7i**, CDCl<sub>3</sub>, 300 MHz

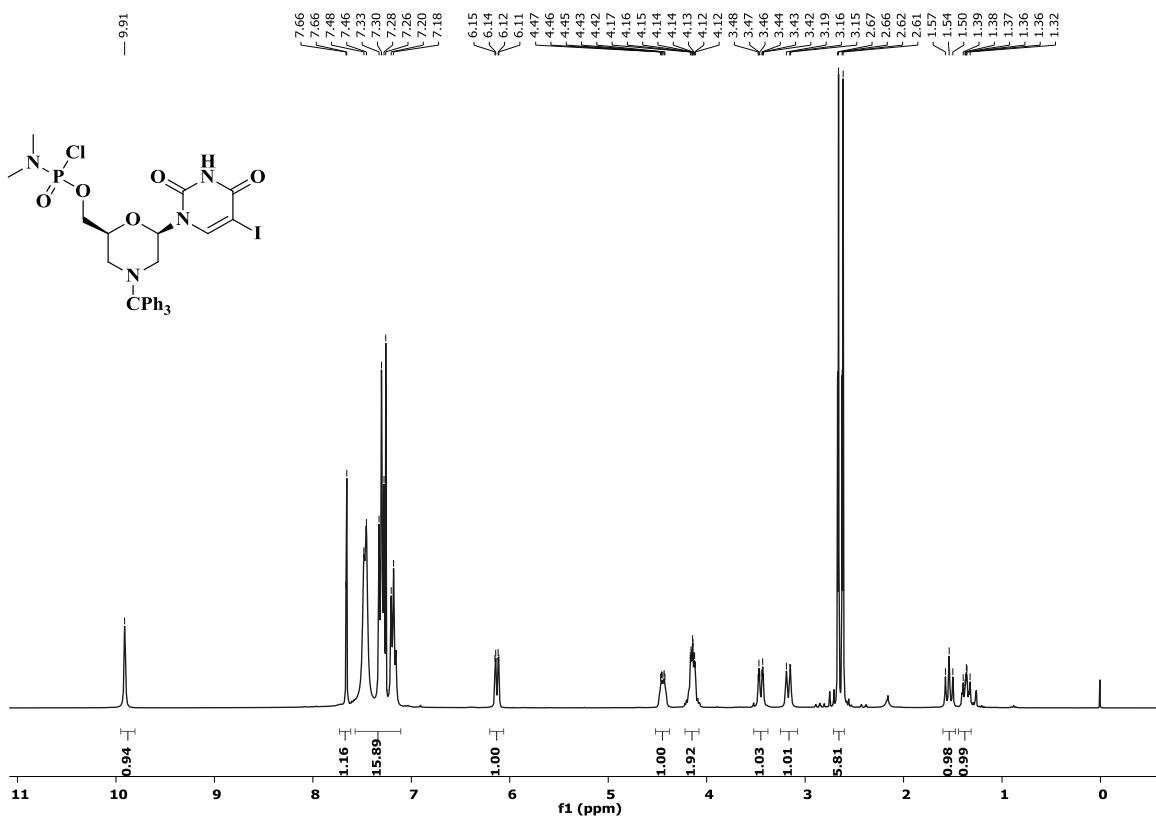

<sup>13</sup>C-NMR of compound **7i**, CDCl<sub>3</sub>, 75 MHz

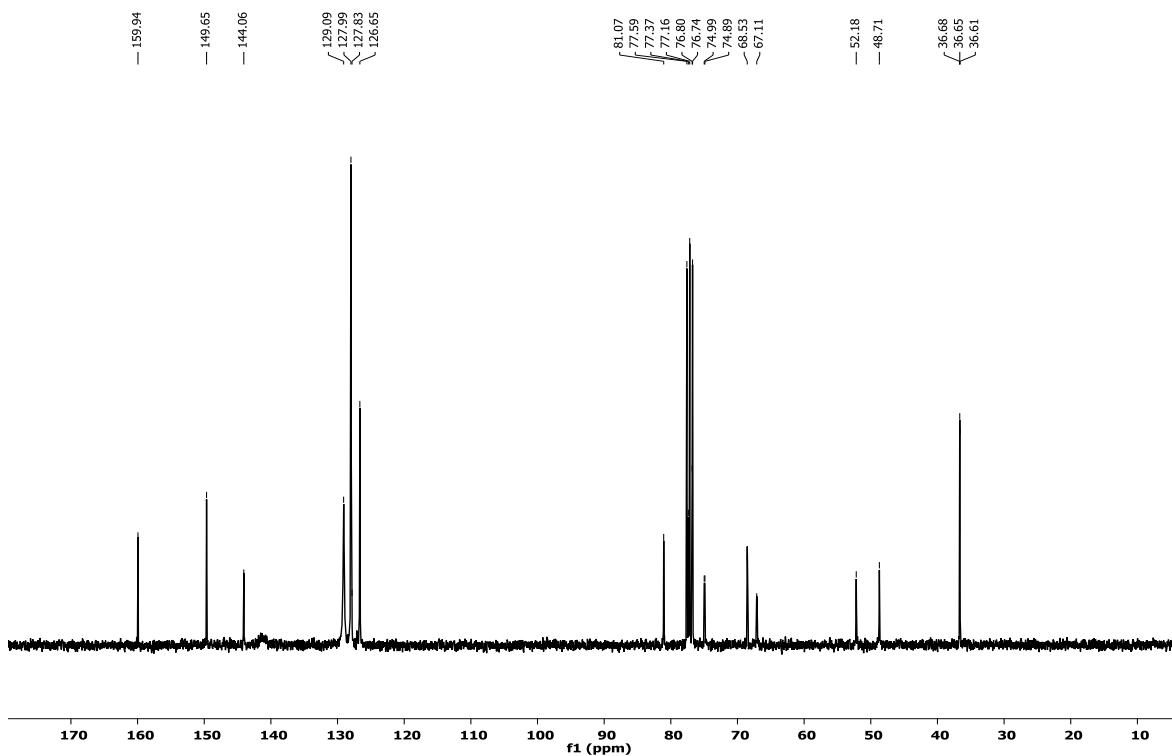

31P-NMR of compound **7i**, CDCl<sub>3</sub>, 121 MHz

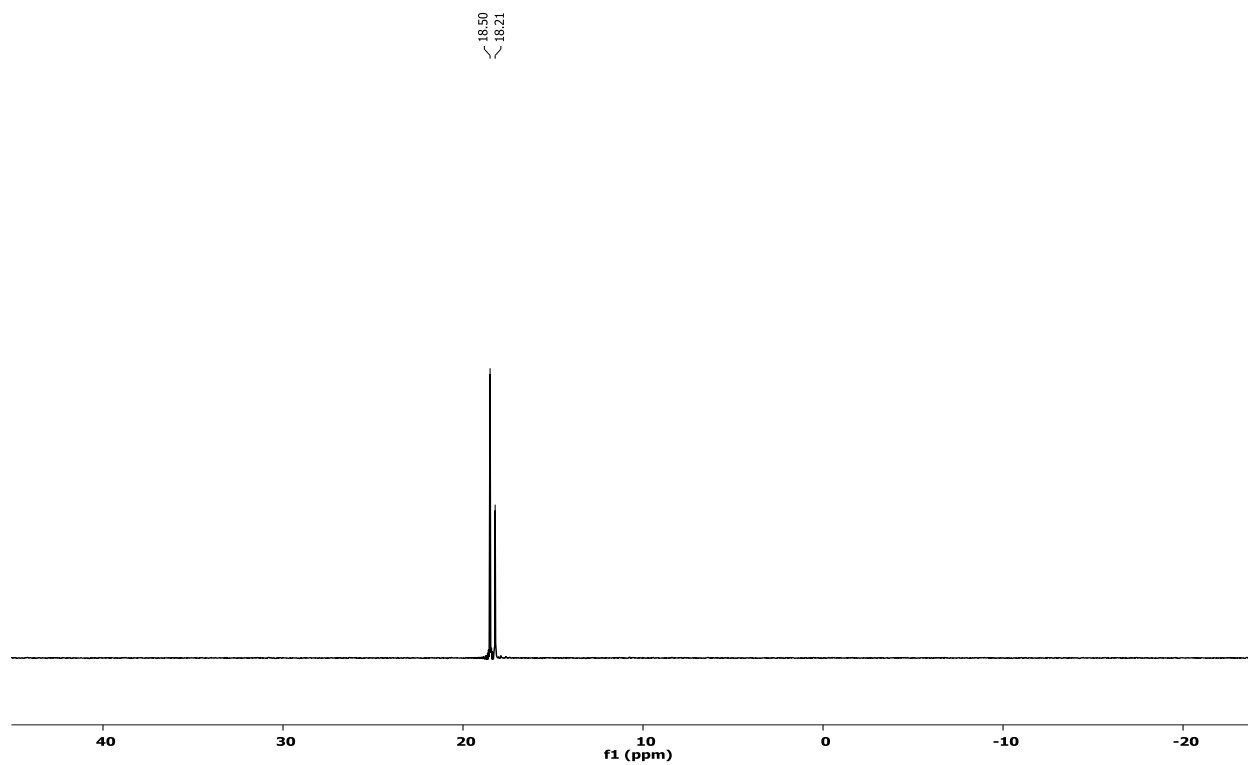

1H-NMR of compound **9a**, CDCl<sub>3</sub>, 300 MHz

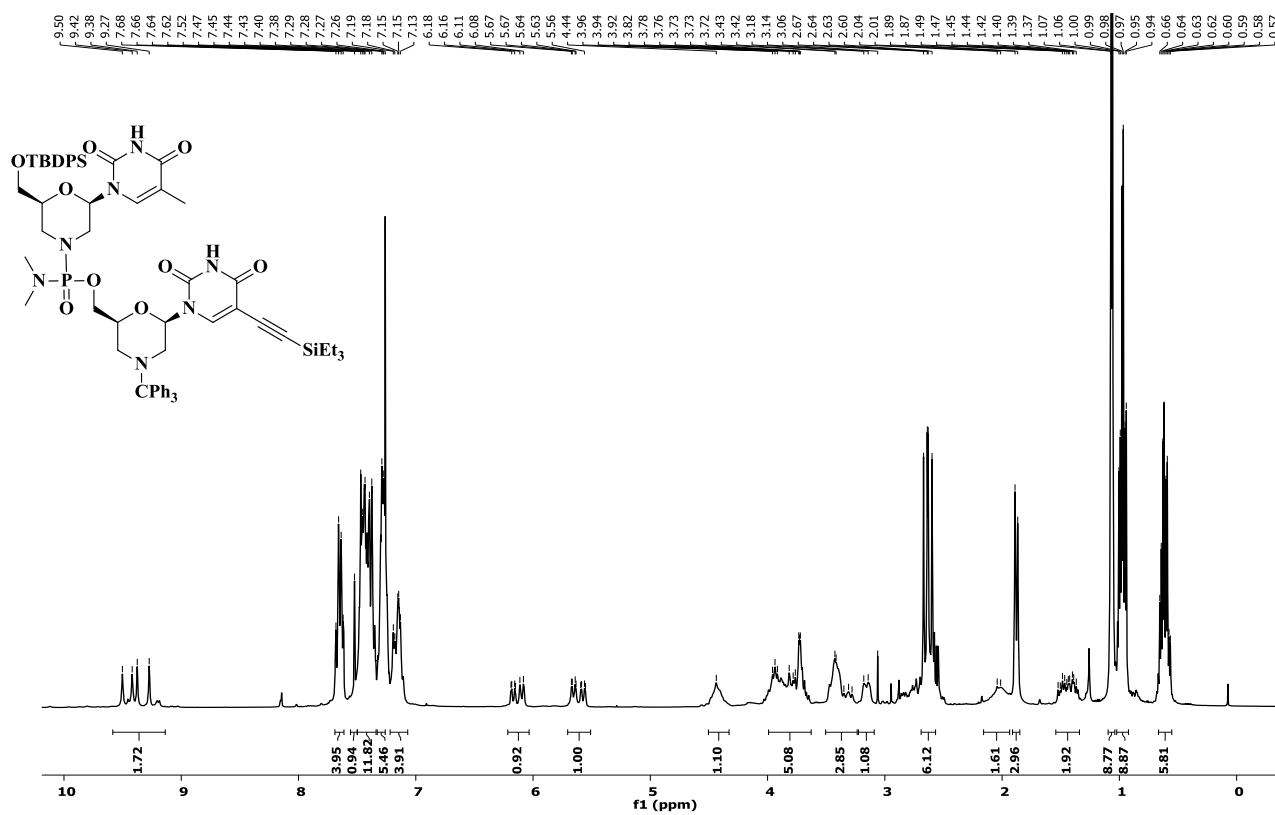

13C-NMR of compound **9a**, CDCl<sub>3</sub>, 125 MHz

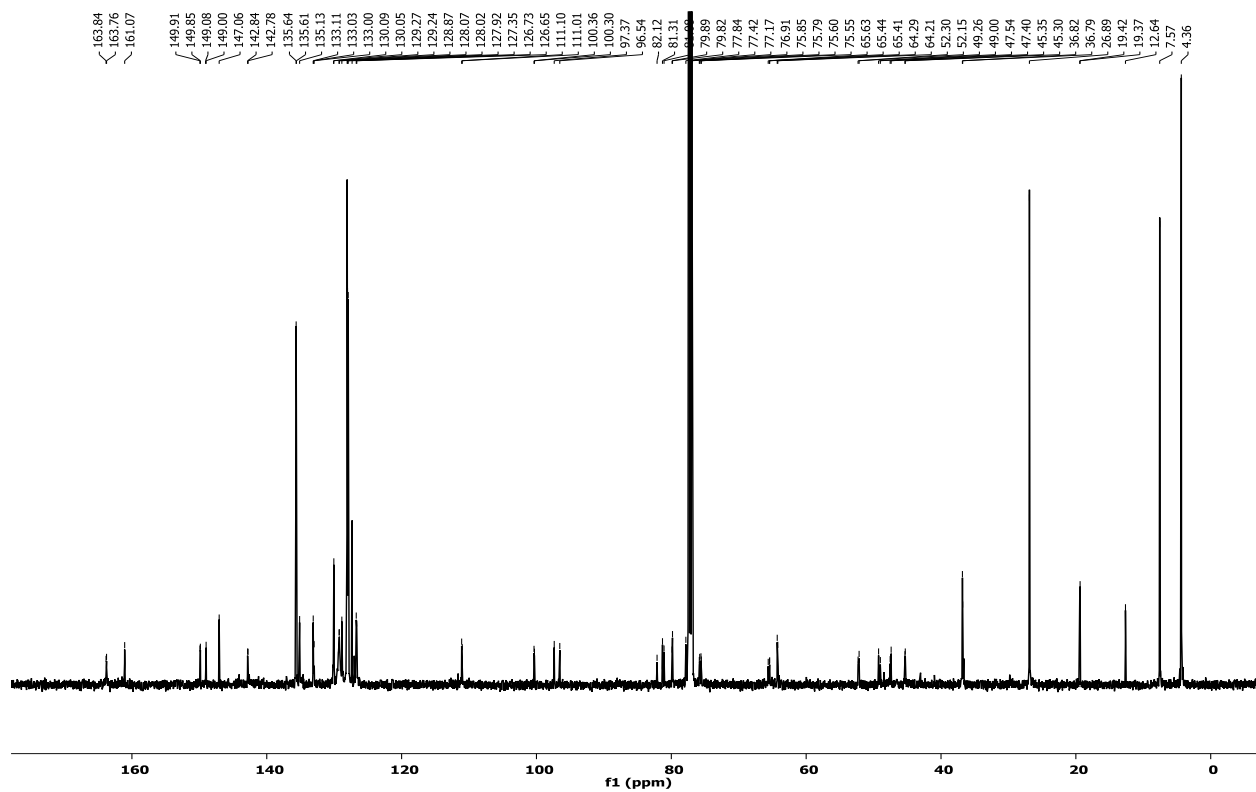

31P-NMR of compound **9a**, CDCl<sub>3</sub>, 121 MHz

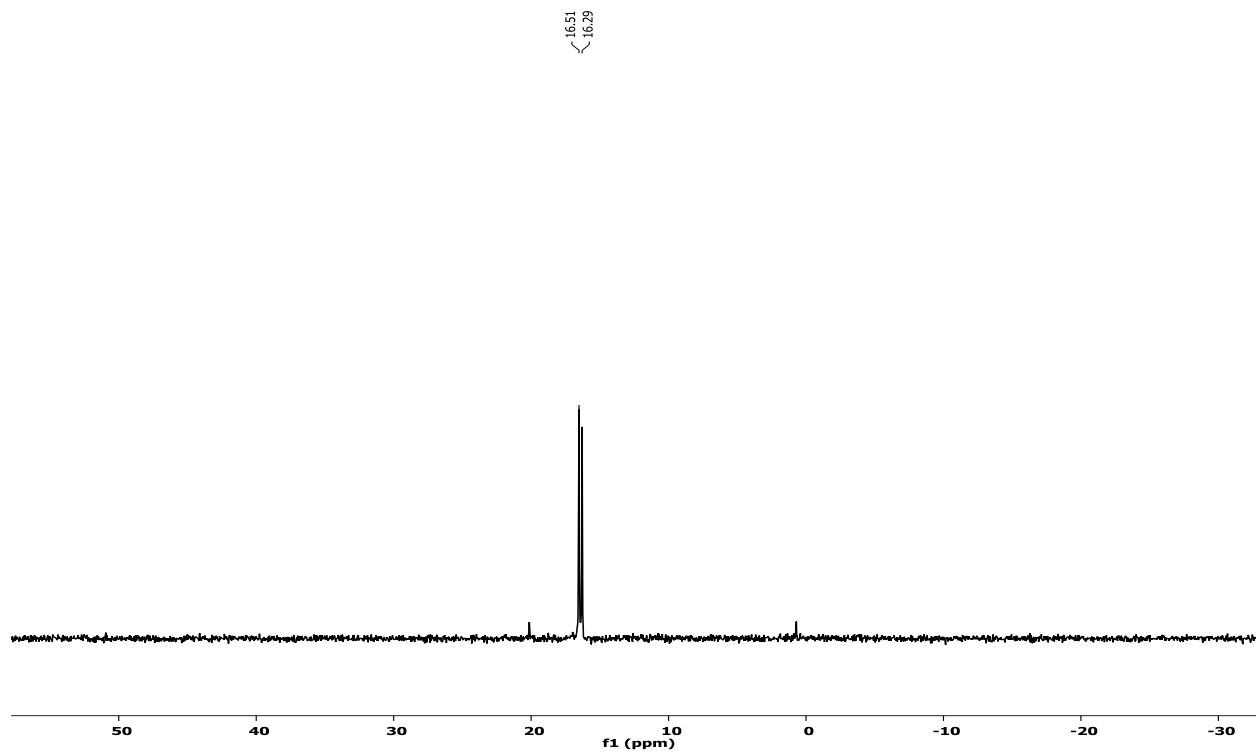

<sup>1</sup>H-NMR of compound **9b**, CDCl<sub>3</sub>, 300 MHz

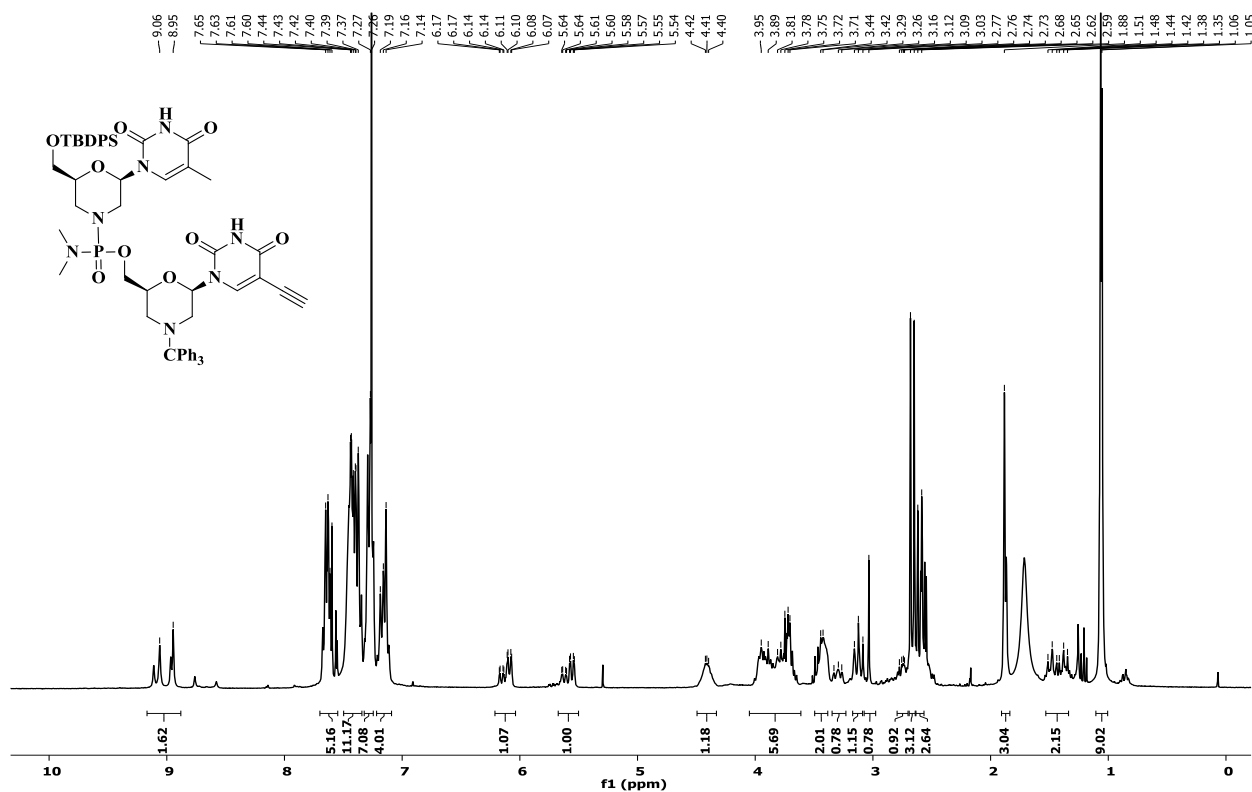

<sup>13</sup>C-NMR of compound **9b**, CDCl<sub>3</sub>, 125 MHz

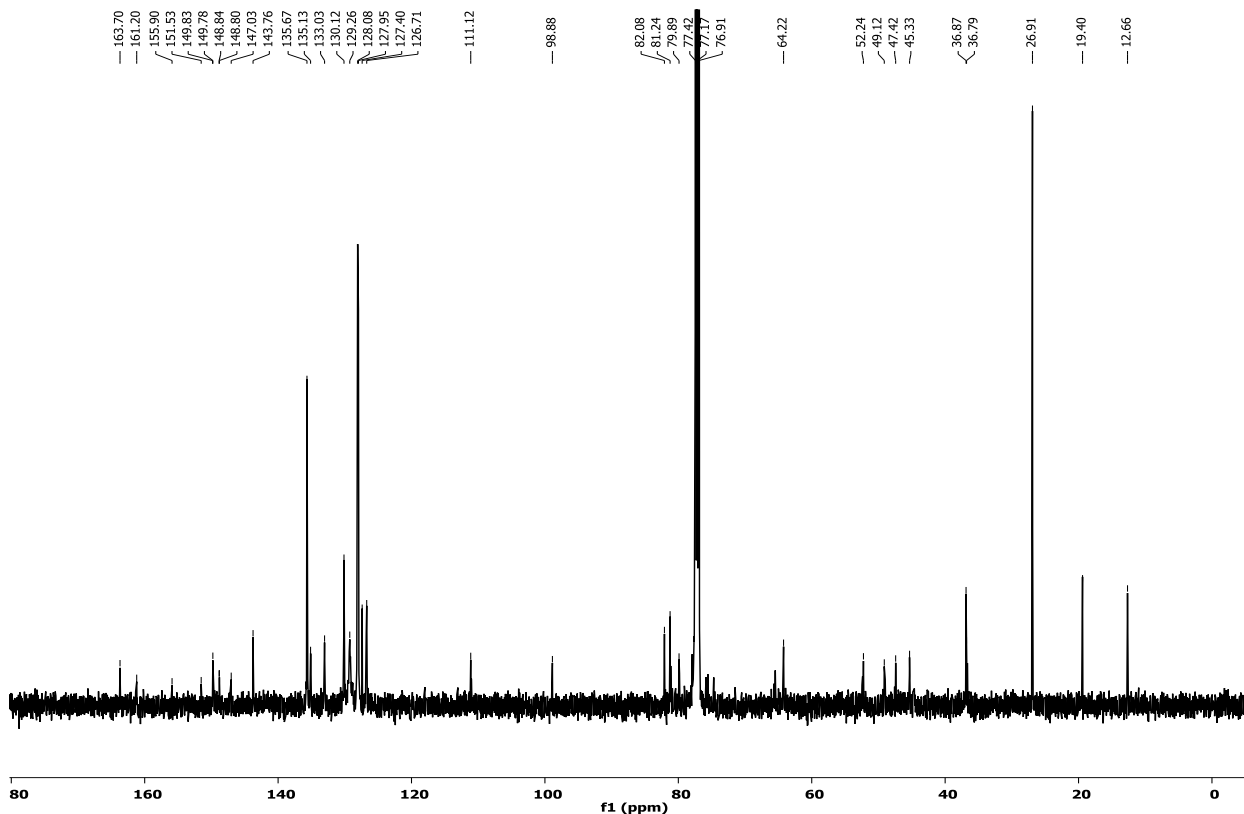

31P-NMR of compound **9b**, CDCl<sub>3</sub>, 121 MHz

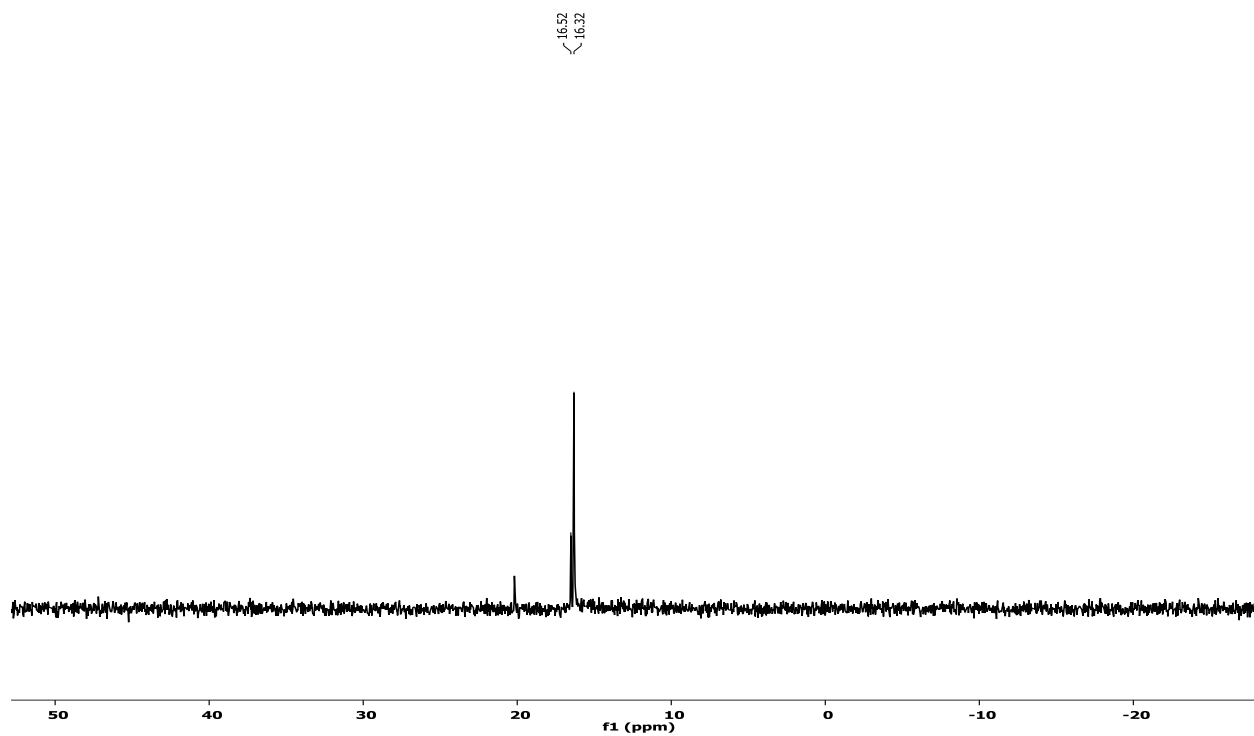

1H-NMR of compound **9c**, CDCl<sub>3</sub>, 300 MHz

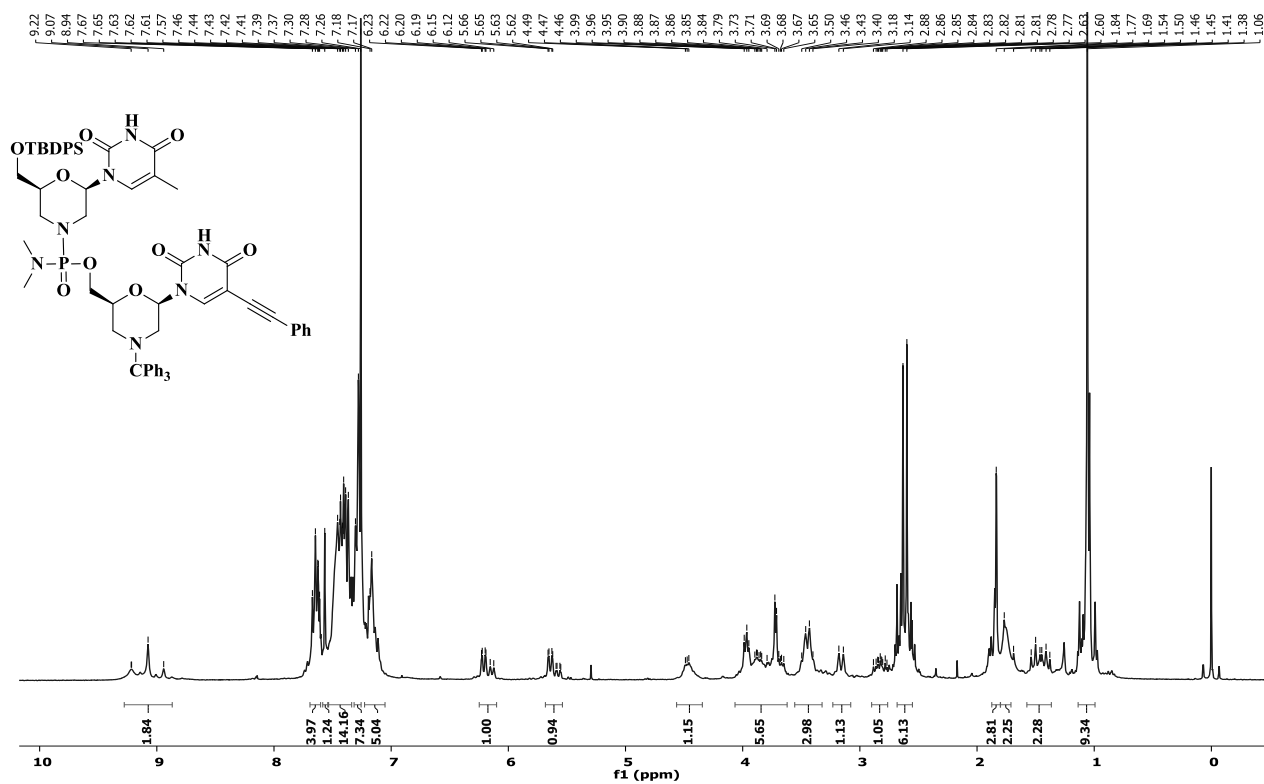

<sup>13</sup>C-NMR of compound **9c**, CDCl<sub>3</sub>, 75 MHz

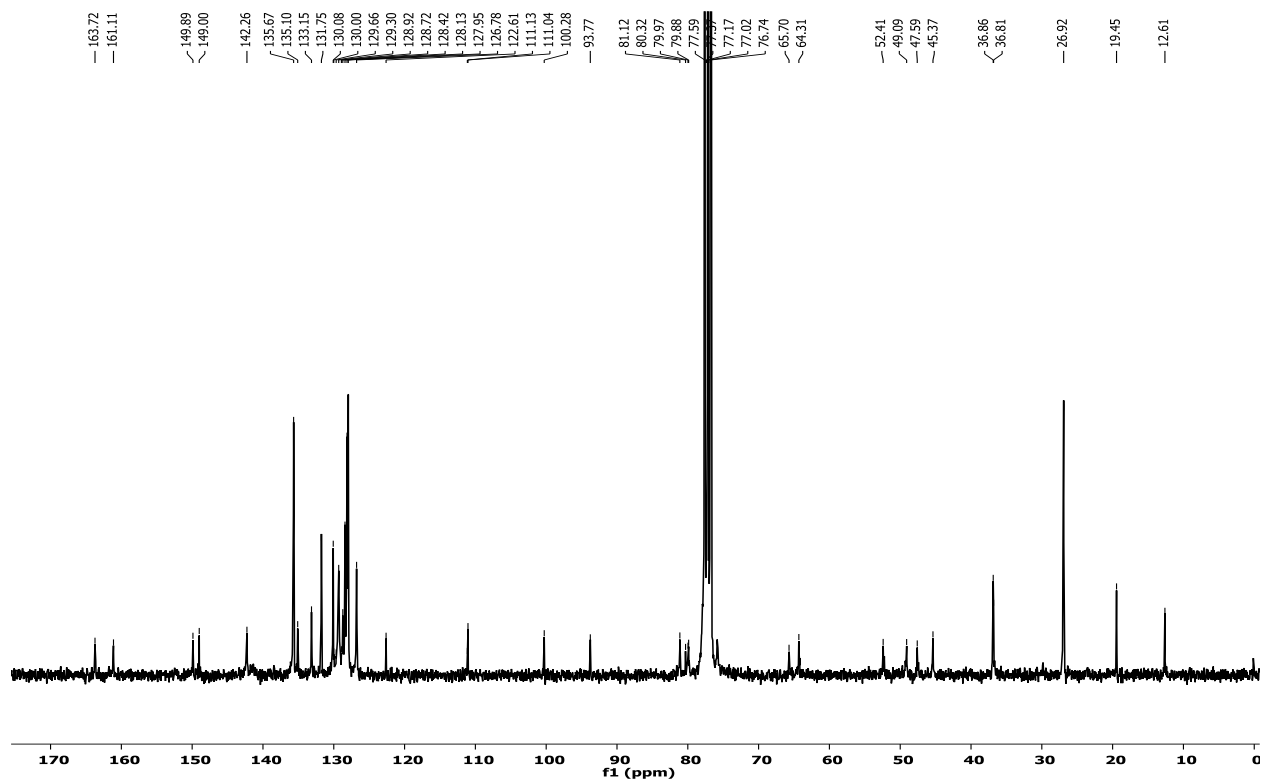

<sup>31</sup>P-NMR of compound **9c**, CDCl<sub>3</sub>, 121 MHz

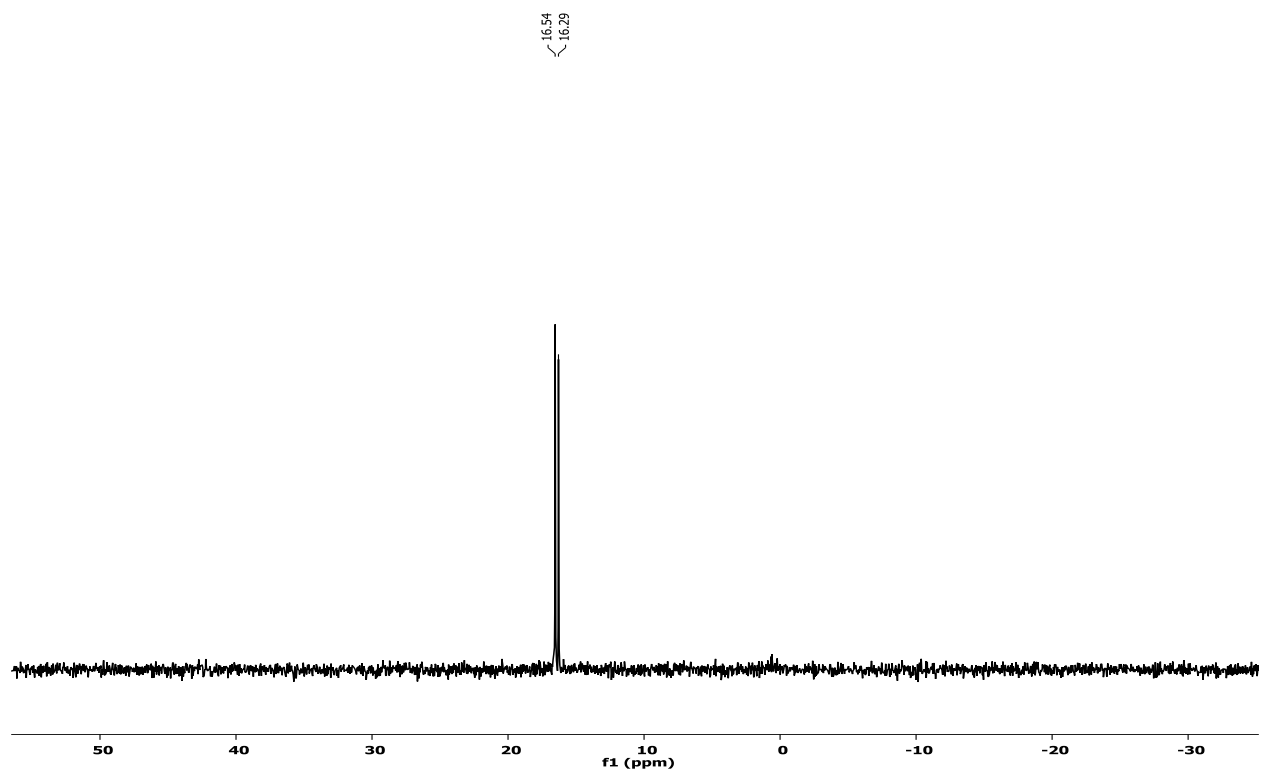

<sup>1</sup>H-NMR of compound **9e**, CDCl<sub>3</sub>, 300 MHz

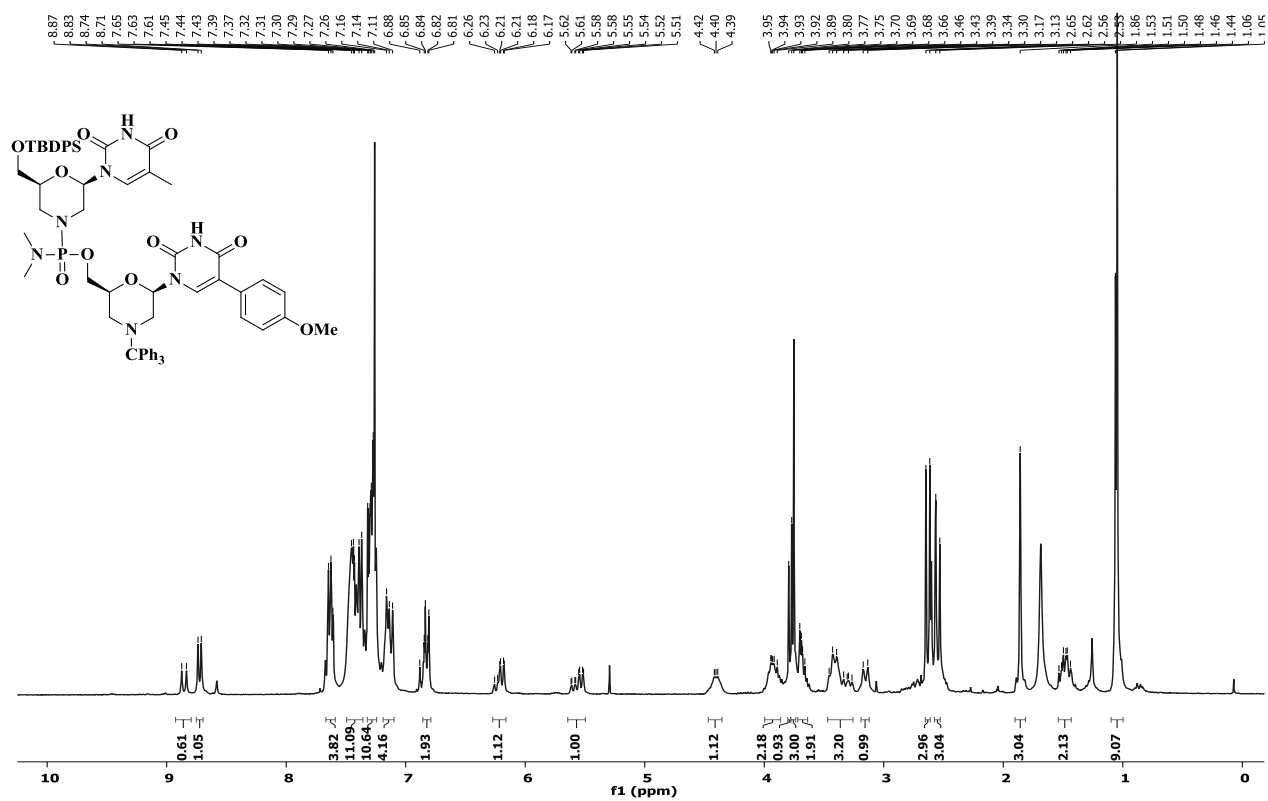

<sup>13</sup>C-NMR of compound **9e**, CDCl<sub>3</sub>, 100 MHz

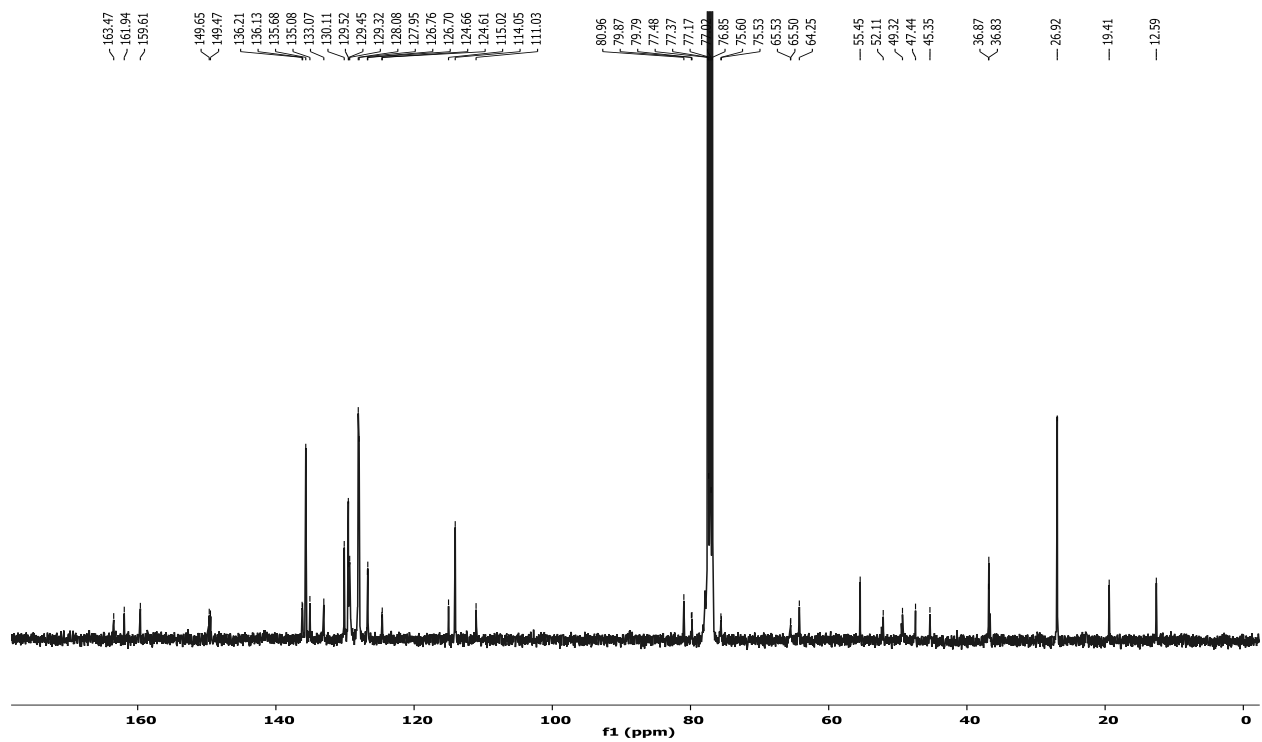



31P-NMR of compound **9e**, CDCl<sub>3</sub>, 121 MHz

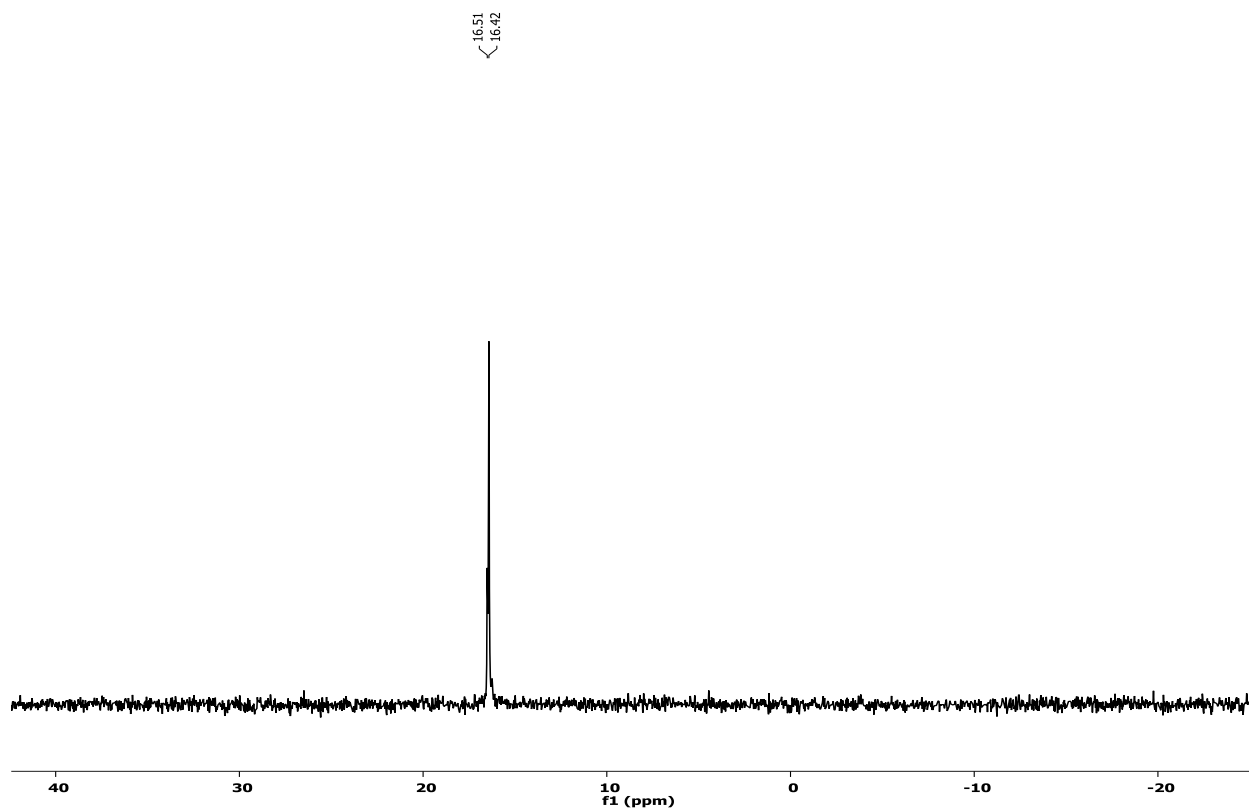

1H-NMR of compound **9h**, CDCl<sub>3</sub>, 300 MHz

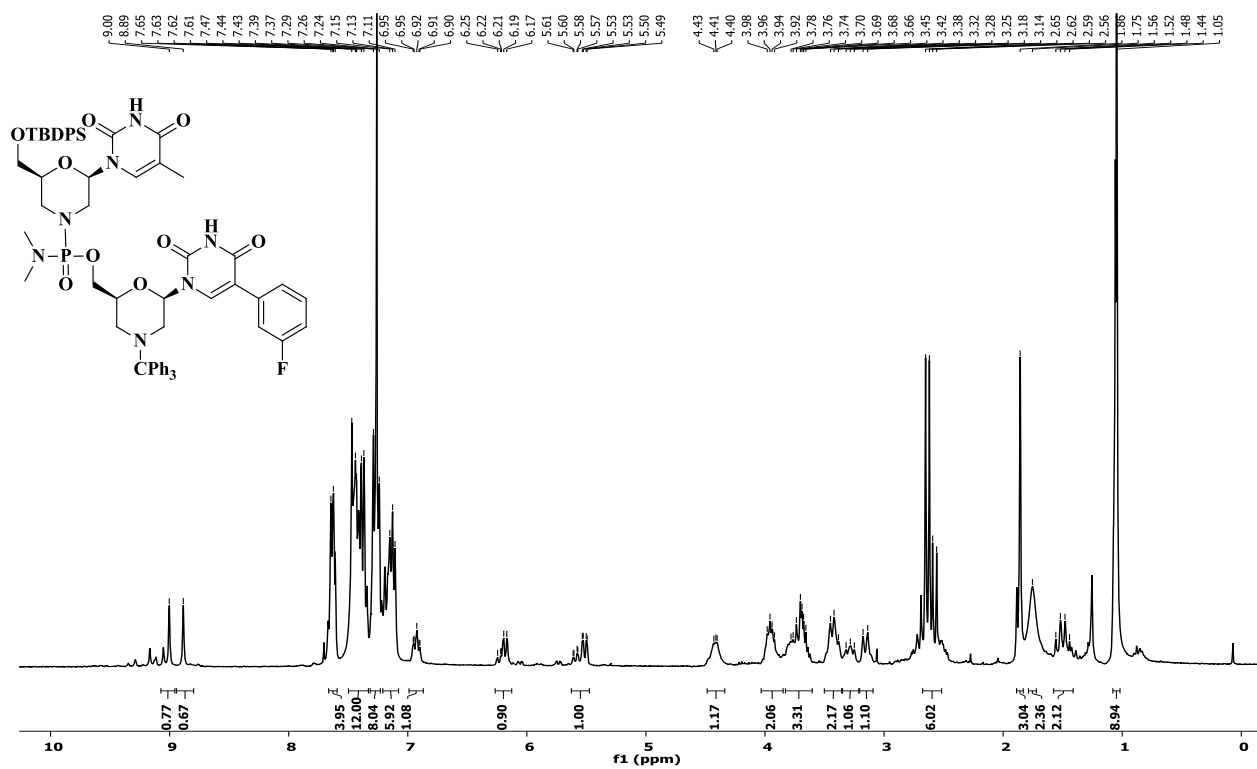

<sup>13</sup>C-NMR of compound **9h**, CDCl<sub>3</sub>, 100 MHz

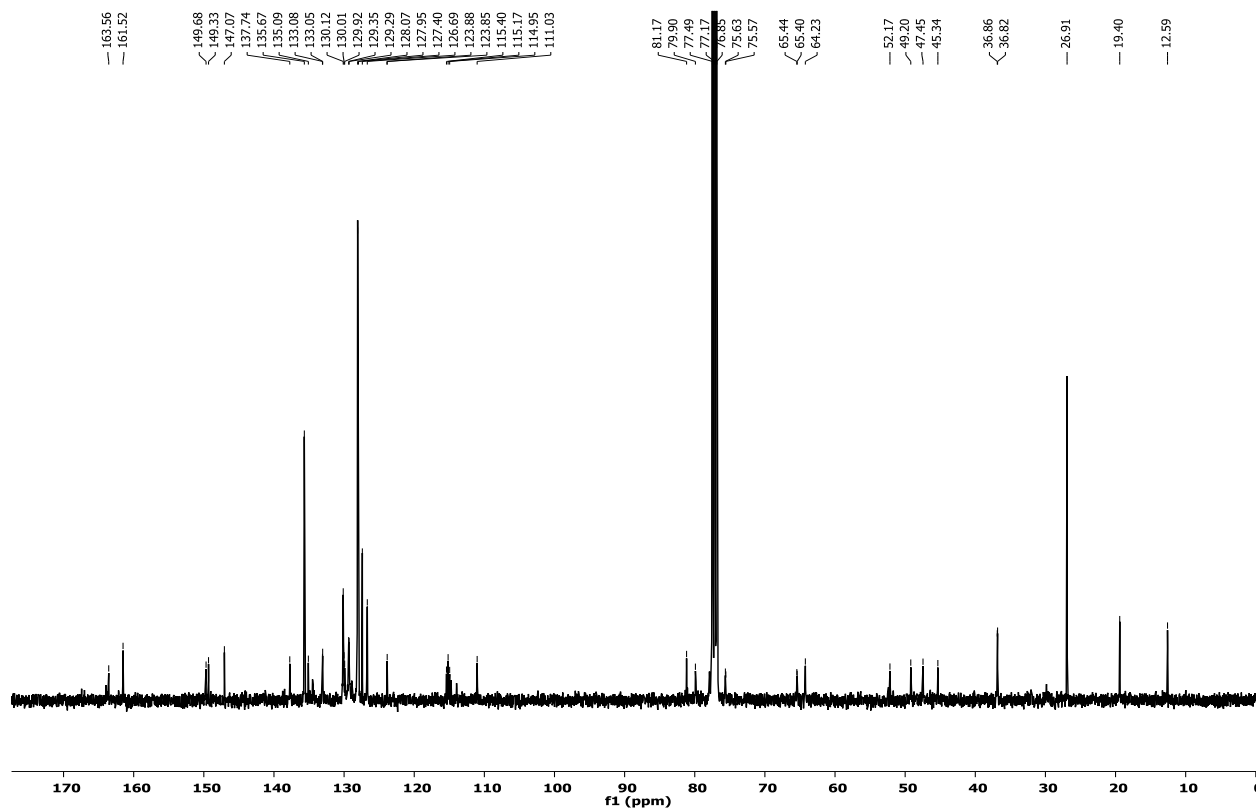

<sup>31</sup>P-NMR of compound **9h**, CDCl<sub>3</sub>, 162 MHz

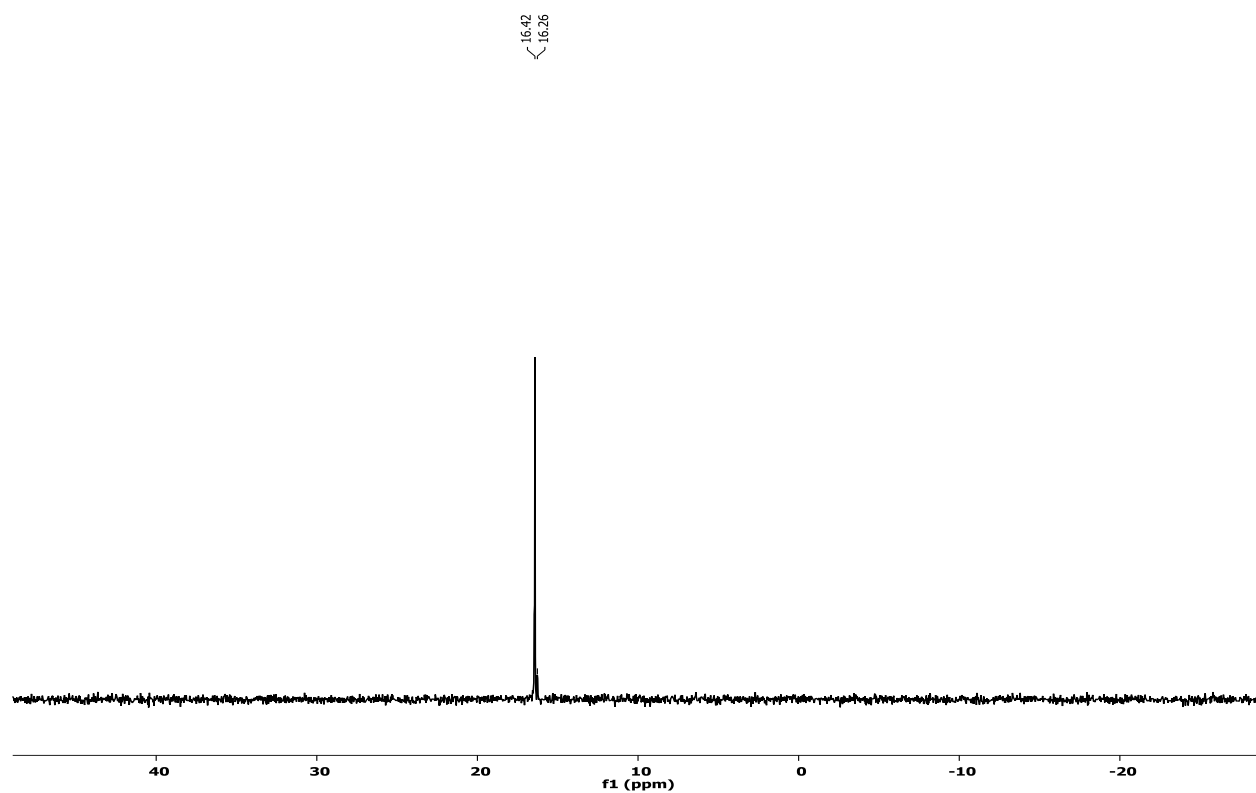

1H-NMR of compound **10b**, CDCl<sub>3</sub>, 300 MHz

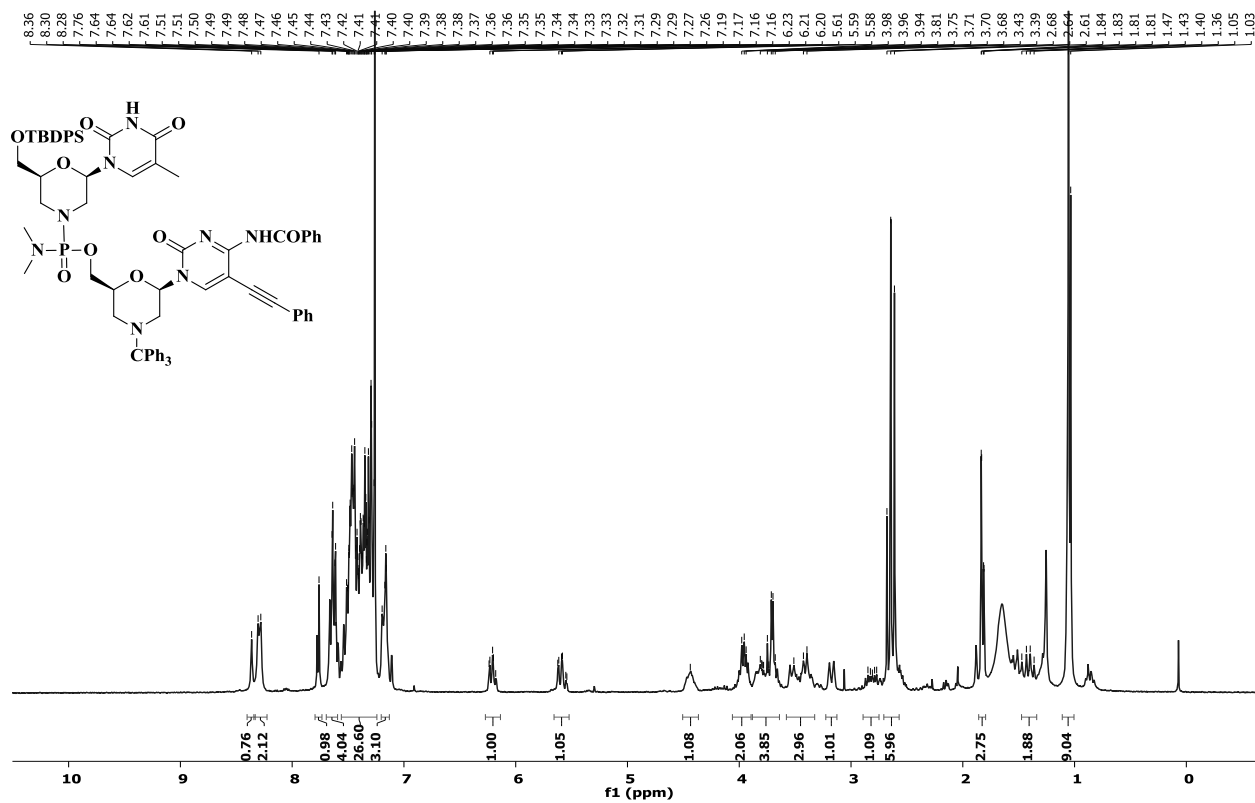

13C-NMR of compound **10b**, CDCl<sub>3</sub>, 100 MHz

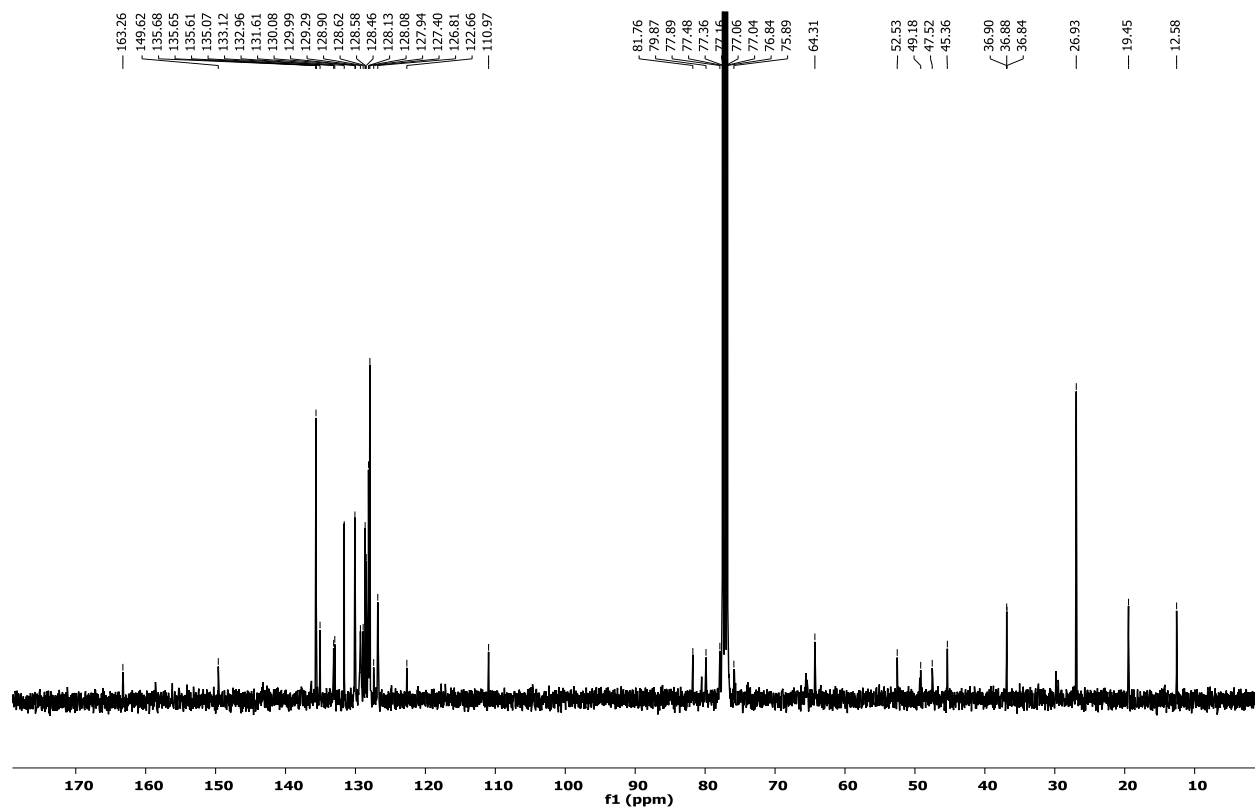

31P-NMR of compound **10b**, CDCl<sub>3</sub>, 100 MHz

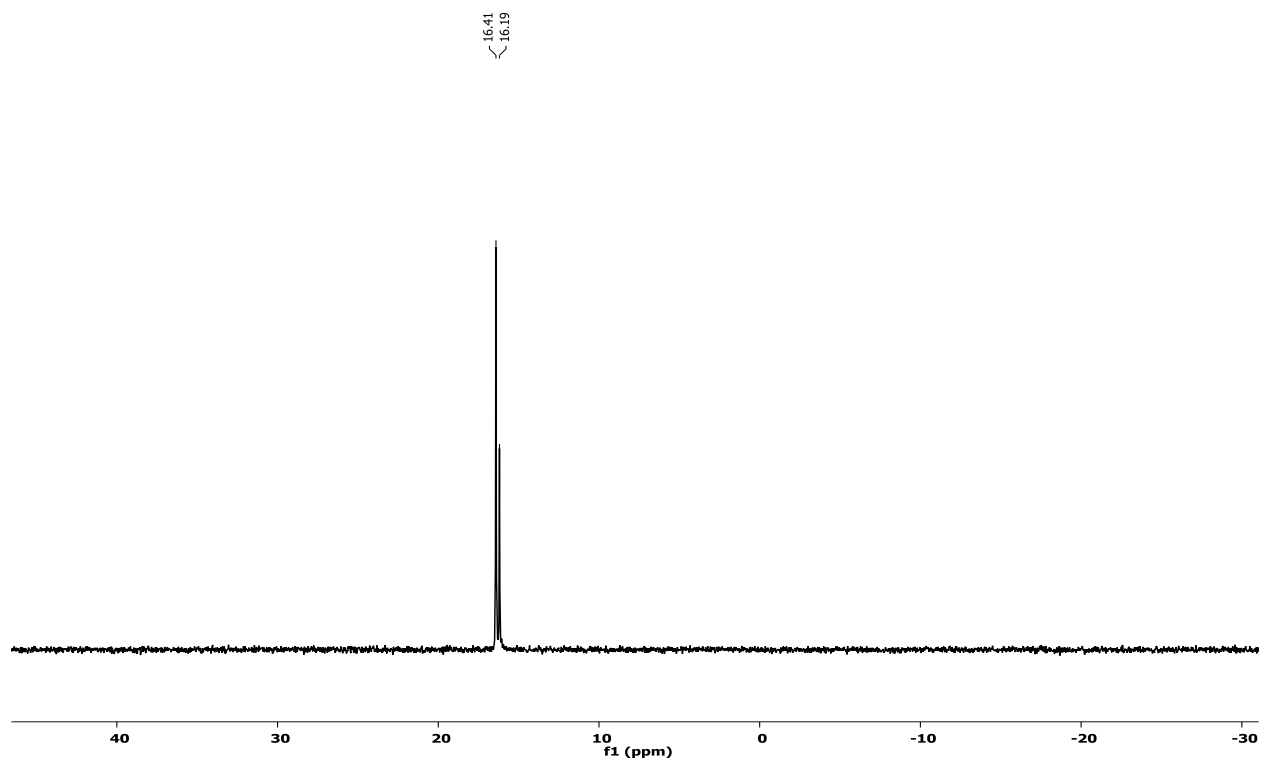

1H-NMR of compound **10d**, CDCl<sub>3</sub>, 300 MHz

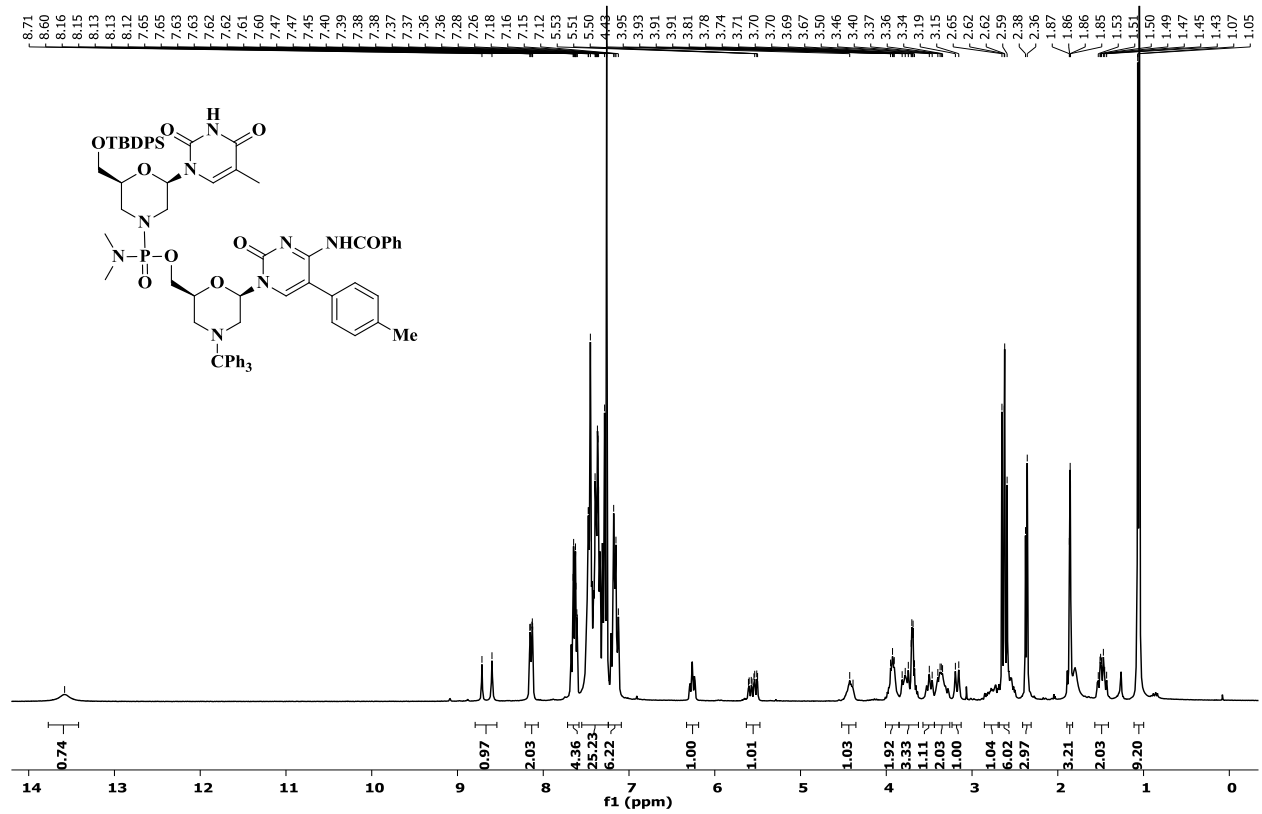

13C-NMR of compound **10d**, CDCl<sub>3</sub>, 100 MHz

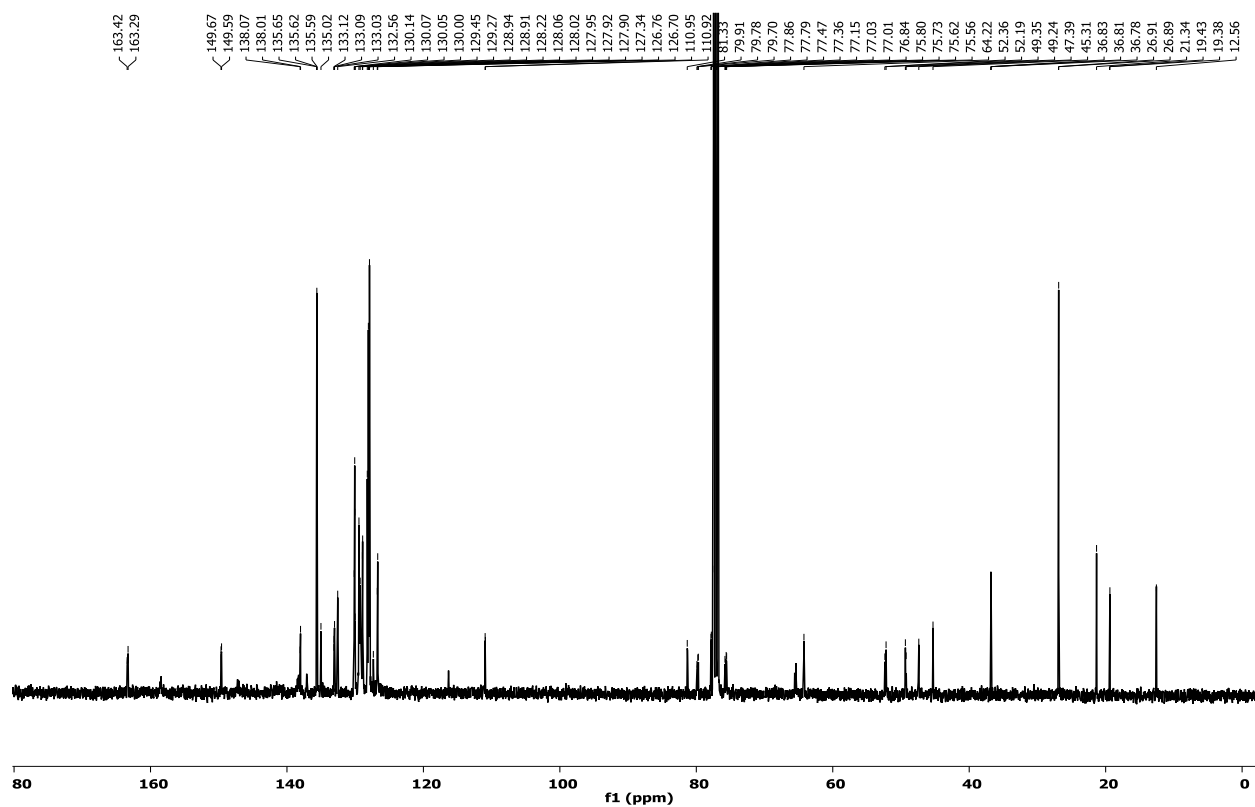

31P-NMR of compound **10d**, CDCl<sub>3</sub>, 162 MHz

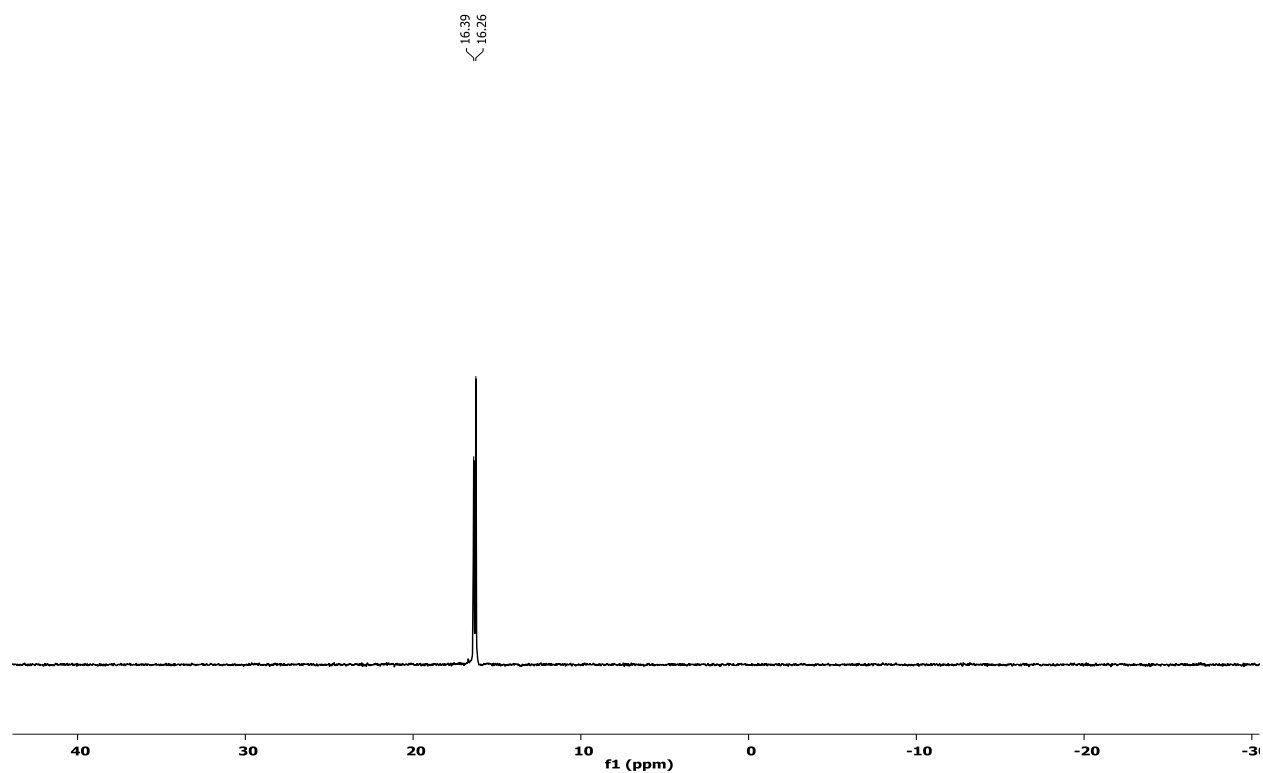

1H-NMR of compound **10f**, CDCl<sub>3</sub>, 300 MHz

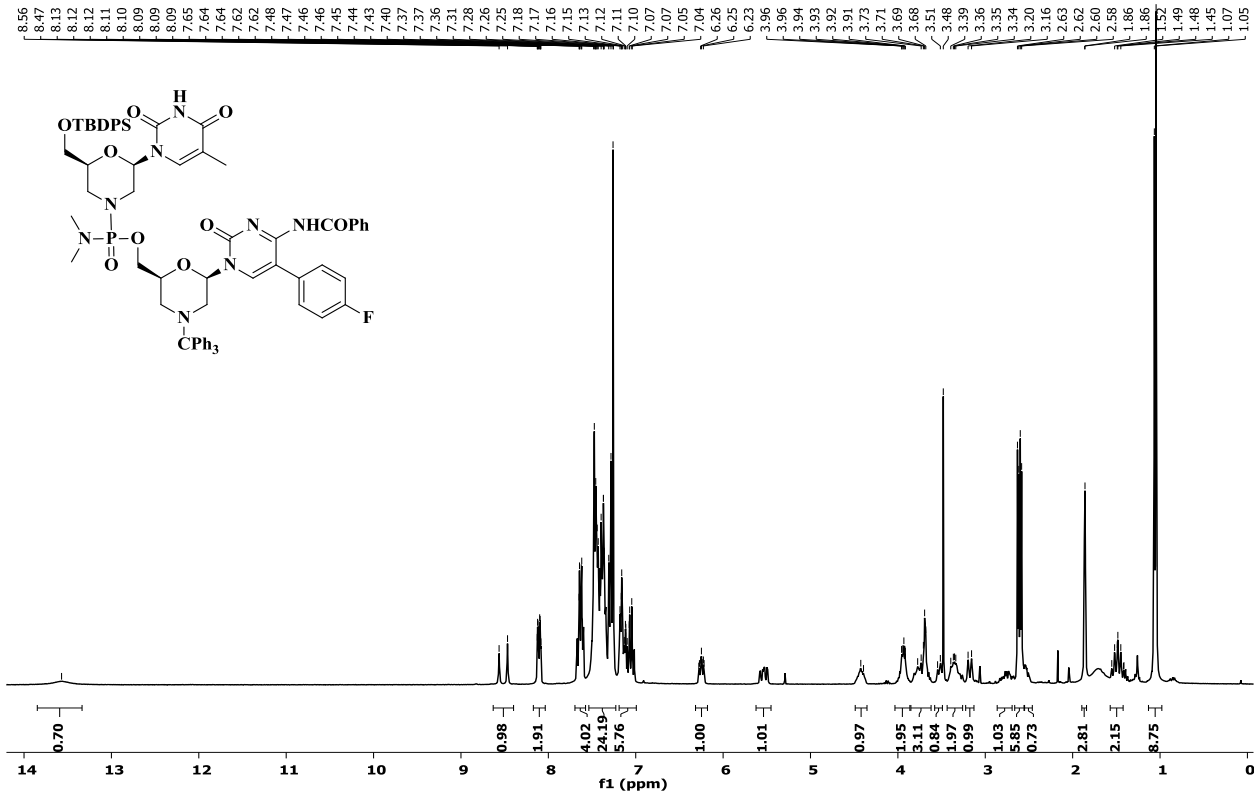

13C-NMR of compound **10f**, CDCl<sub>3</sub>, 100 MHz

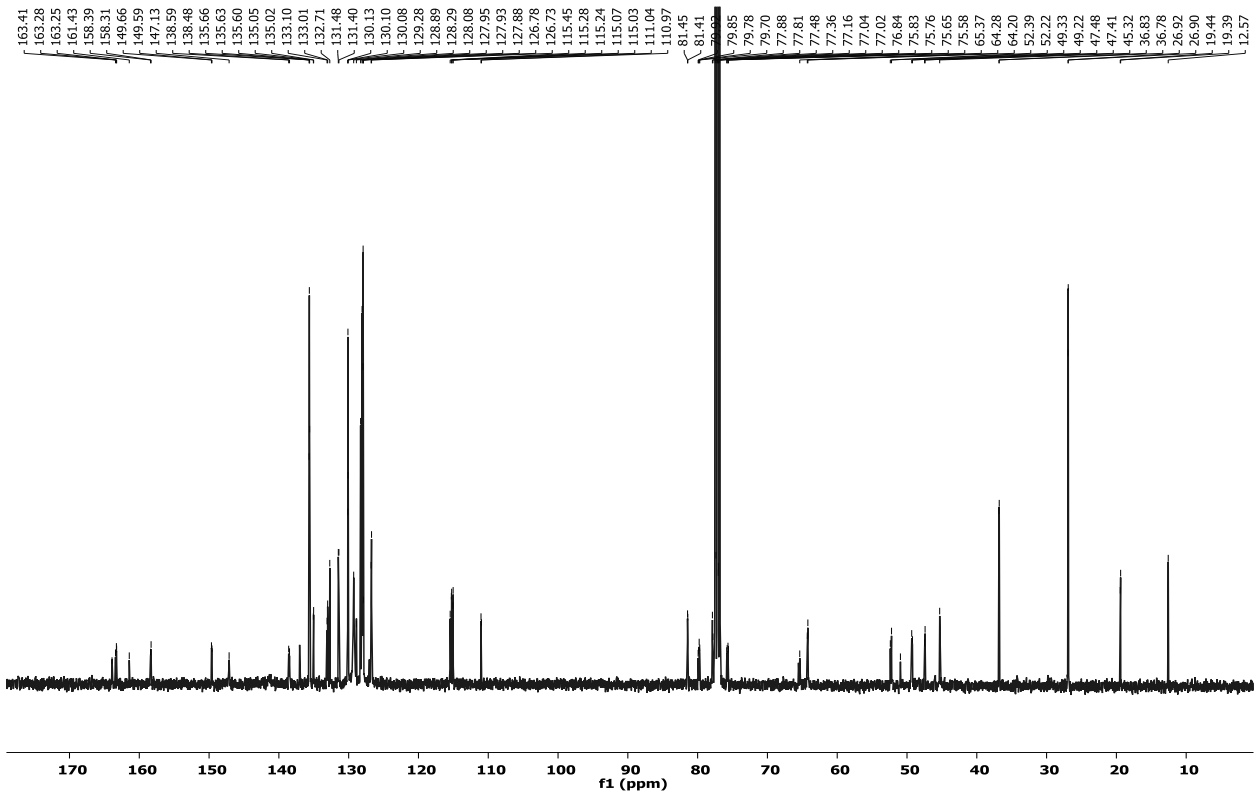

31P-NMR of compound **10f**, CDCl<sub>3</sub>, 162 MHz

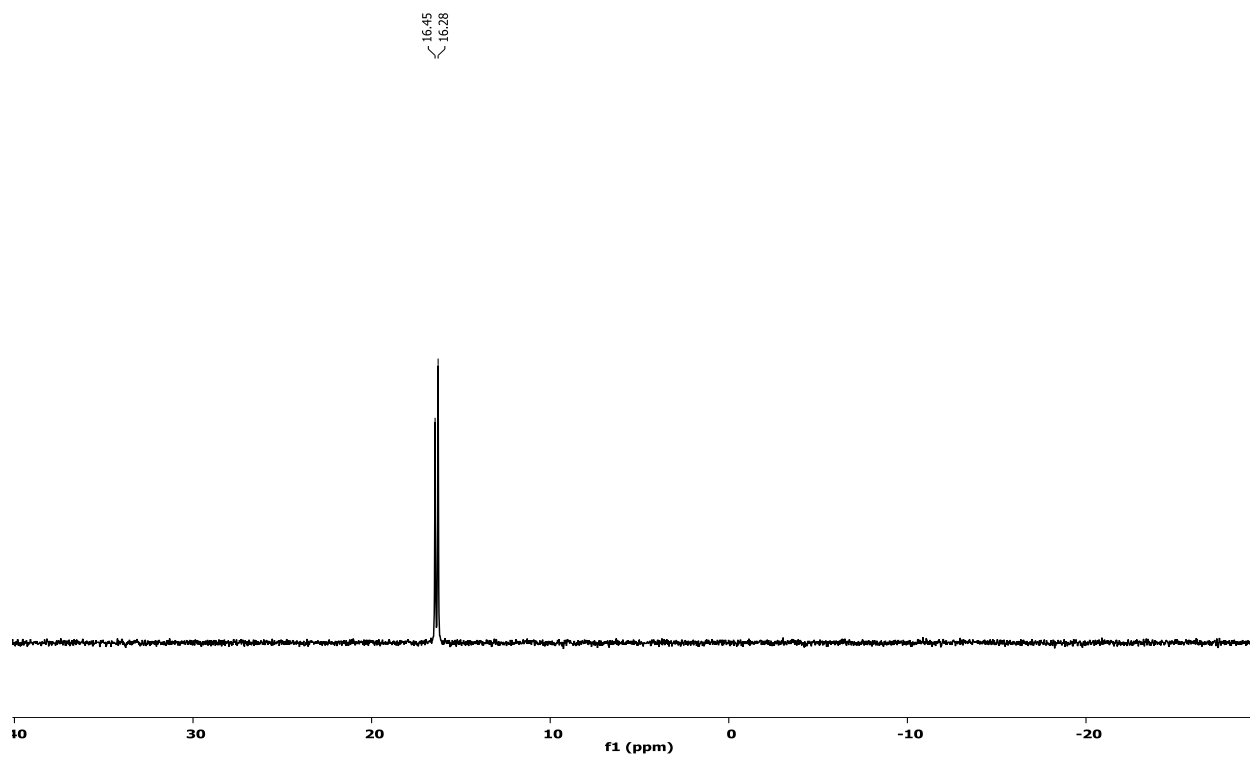

1H-NMR of compound **10h**, CDCl<sub>3</sub>, 300 MHz

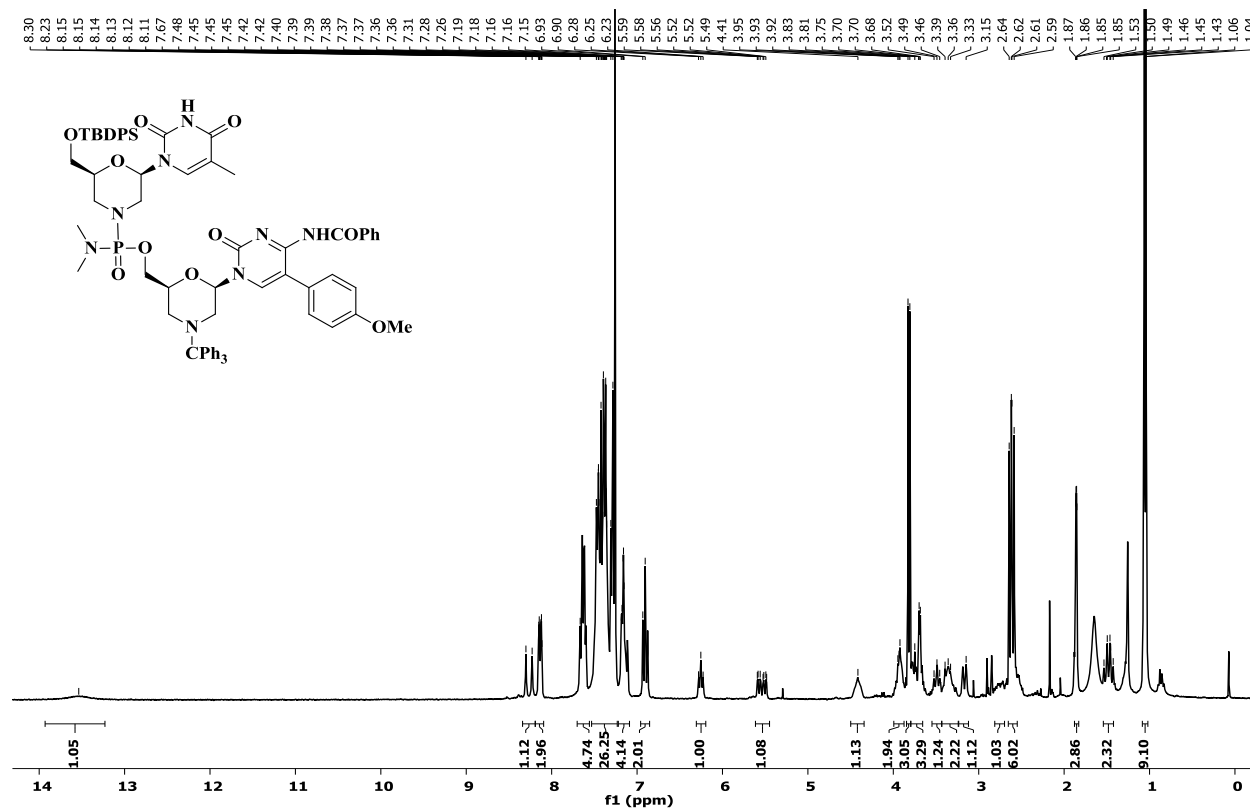

13C-NMR of compound **10h**, CDCl<sub>3</sub>, 100 MHz

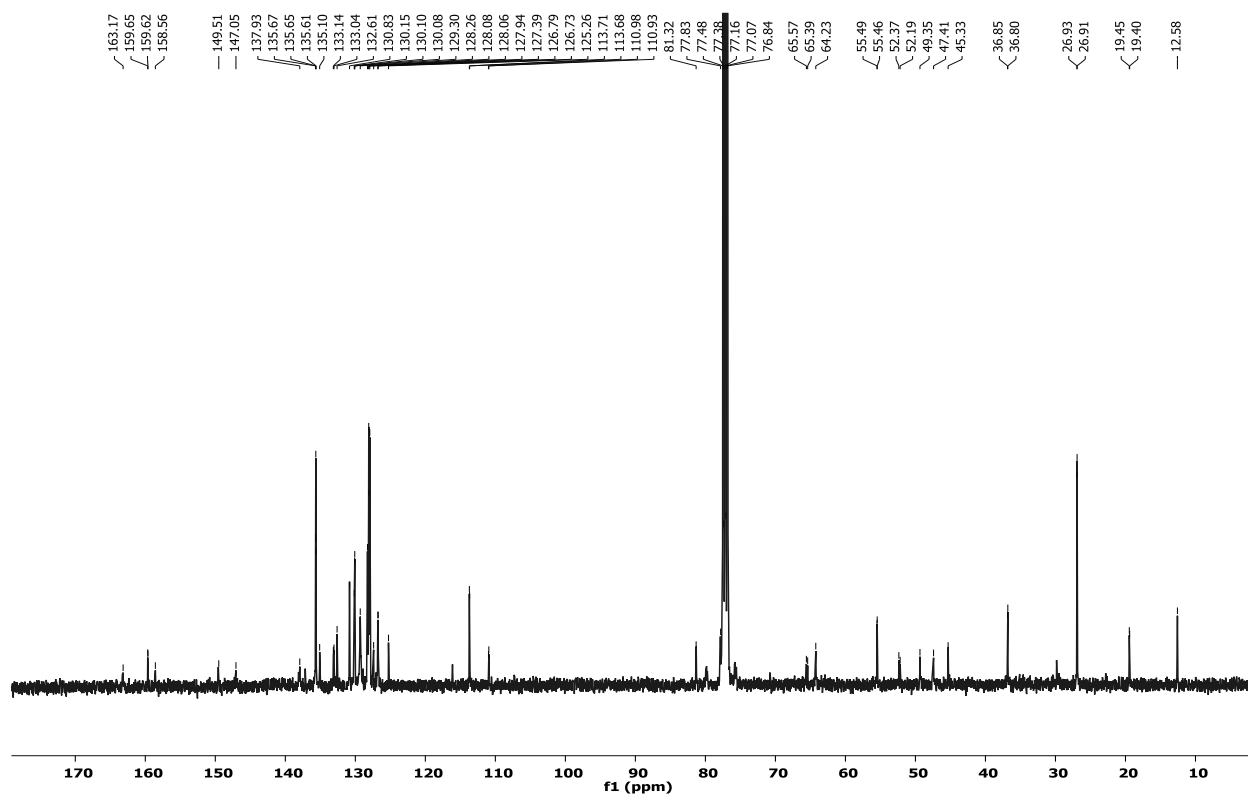

31P-NMR of compound **10h**, CDCl<sub>3</sub>, 162 MHz

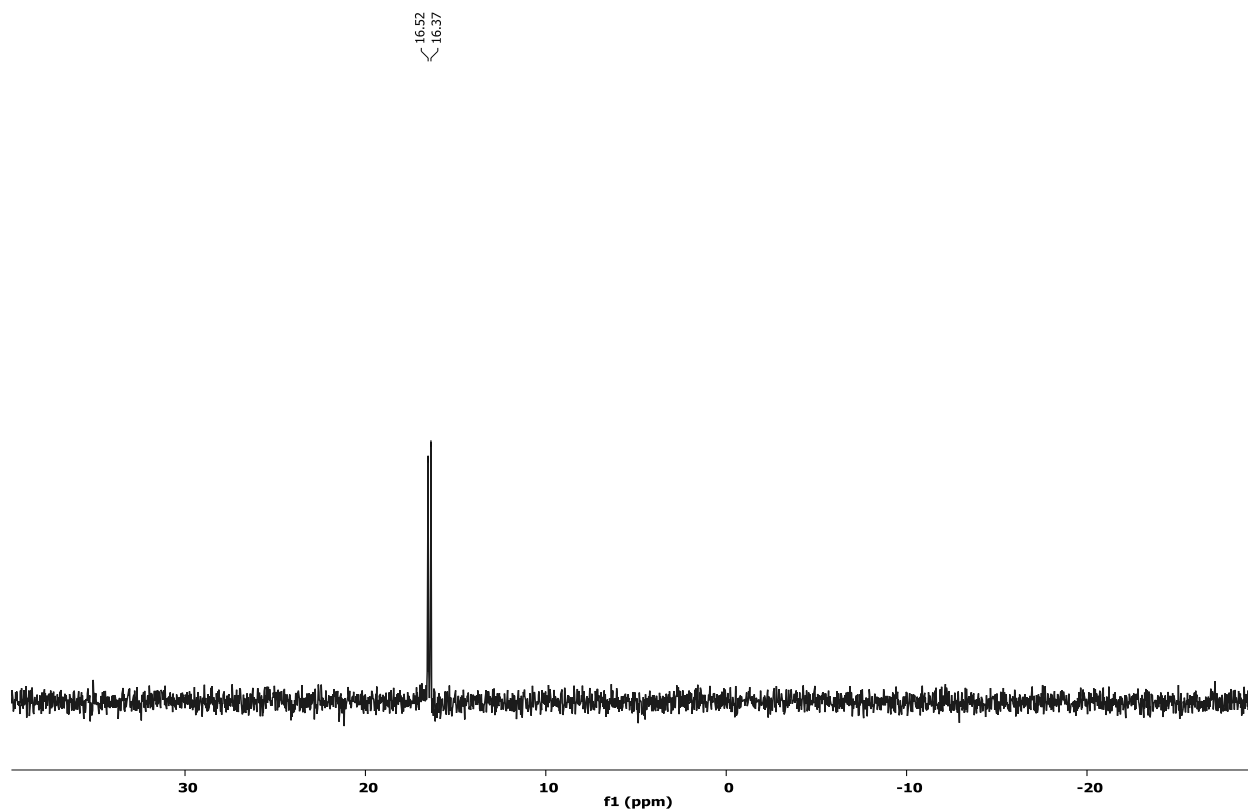



#### 4. Dimer Formation reaction and HPLC analysis

| Sl. No | Reaction condition                                                             | Additive | HPLC analysis (Retention time, % purity of dimer peak) |
|--------|--------------------------------------------------------------------------------|----------|--------------------------------------------------------|
| 1      | Compound <b>8</b> + Additive (2 eq) + Compound <b>7c</b> (1.5 eq) + NEM (3 eq) | LiBr     | 5.56 min, 71.2%                                        |
| 2      |                                                                                | ETT      | 5.55 min, 79.7%                                        |
| 3      | Compound <b>8</b> + Additive (2 eq) + Compound <b>7h</b> (1.5 eq)+ NEM (3 eq)  | LiBr     | 5.50 min, 81.7%                                        |
| 4      |                                                                                | ETT      | 5.42 min, 82.9%                                        |

**Table S2:** HPLC analysis of the reaction mixture of dimer formation reaction. HPLC was carried out by C-18 (Ascentis) column using Acetonitrile as eluent (Flow rate = 1ml / min)

#### Chromatogram

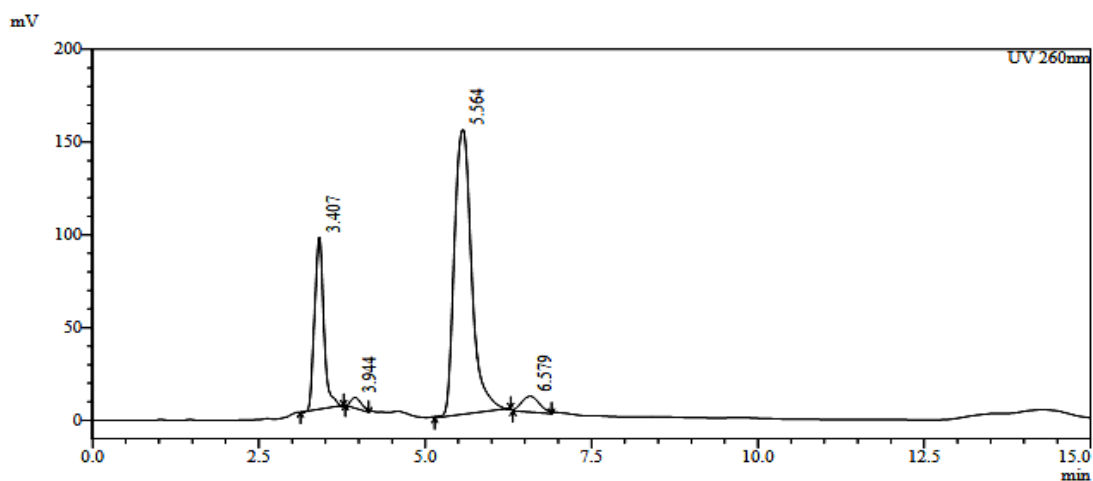

#### Peak Table

| UV 260nm     |           |                |               |                |
|--------------|-----------|----------------|---------------|----------------|
| Peak#        | Ret. Time | Area           | Height        | Area%          |
| 1            | 3.407     | 887984         | 92765         | 22.941         |
| 2            | 3.944     | 63767          | 5717          | 1.647          |
| 3            | 5.564     | 2757521        | 153583        | 71.240         |
| 4            | 6.579     | 161462         | 8588          | 4.171          |
| <b>Total</b> |           | <b>3870735</b> | <b>260653</b> | <b>100.000</b> |

**Figure S1:** HPLC chromatogram of the crude reaction mixture of entry 1 (LiBr) of Table S2.

### Chromatogram

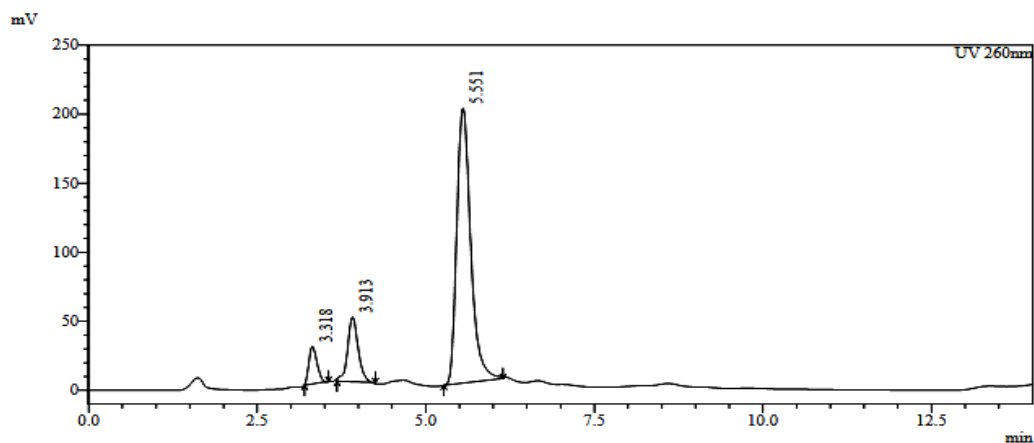

### Peak Table

| UV 260nm     |           |                |               |                |
|--------------|-----------|----------------|---------------|----------------|
| Peak#        | Ret. Time | Area           | Height        | Area%          |
| 1            | 3.318     | 225619         | 27035         | 6.252          |
| 2            | 3.913     | 505857         | 46667         | 14.017         |
| 3            | 5.551     | 2877480        | 199016        | 79.732         |
| <b>Total</b> |           | <b>3608956</b> | <b>272718</b> | <b>100.000</b> |

Figure S2: HPLC chromatogram of the crude reaction mixture of entry 2 (ETT) of Table S2.

### Chromatogram

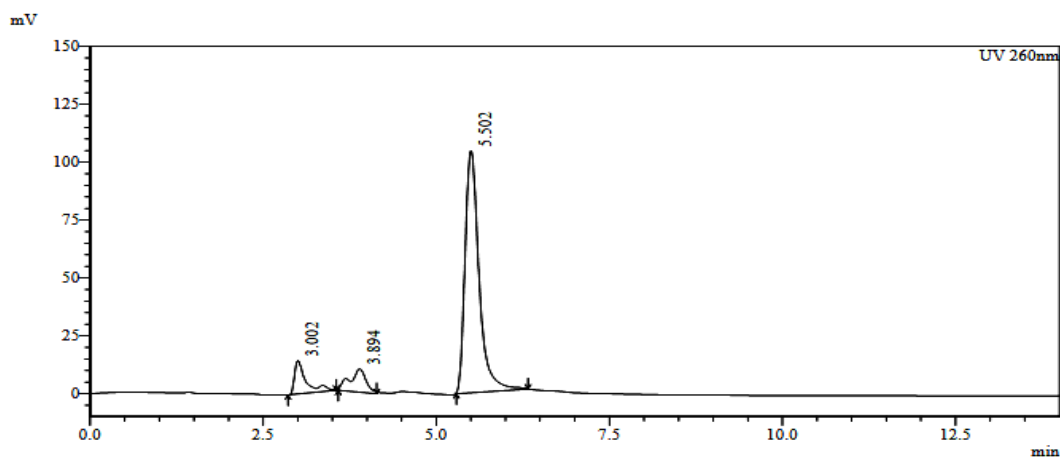

### Peak Table

| UV 260nm     |           |                |               |                |
|--------------|-----------|----------------|---------------|----------------|
| Peak#        | Ret. Time | Area           | Height        | Area%          |
| 1            | 3.002     | 167044         | 14395         | 9.262          |
| 2            | 3.894     | 161618         | 10030         | 8.961          |
| 3            | 5.502     | 1474866        | 104584        | 81.777         |
| <b>Total</b> |           | <b>1803527</b> | <b>129010</b> | <b>100.000</b> |

Figure S3: HPLC chromatogram of the crude reaction mixture of entry 3 (LiBr) of Table S2.

### Chromatogram

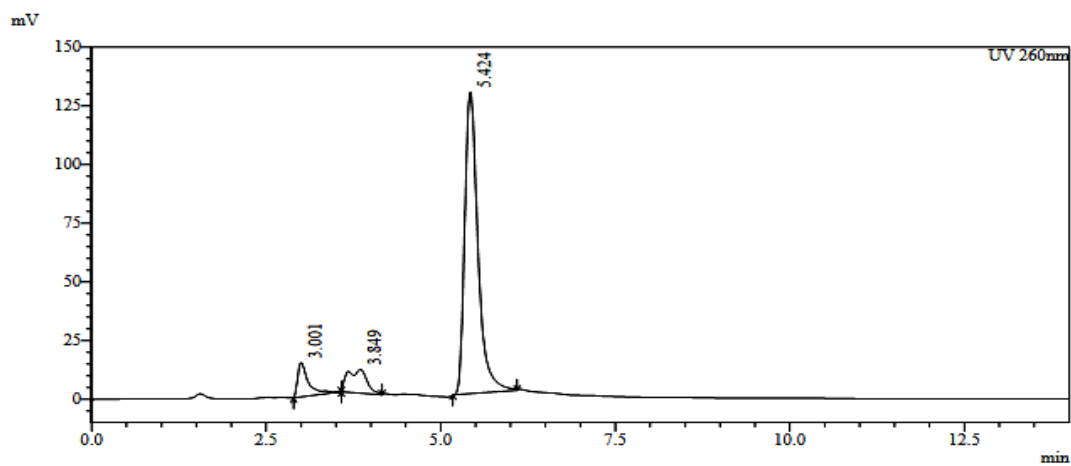

### Peak Table

| UV 260nm |           |         |        |         |
|----------|-----------|---------|--------|---------|
| Peak#    | Ret. Time | Area    | Height | Area%   |
| 1        | 3.001     | 157237  | 14619  | 7.673   |
| 2        | 3.849     | 193387  | 10141  | 9.437   |
| 3        | 5.424     | 1698606 | 128572 | 82.890  |
| Total    |           | 2049230 | 153332 | 100.000 |

Figure S4: HPLC chromatogram of the crude reaction mixture of entry 4 (ETT) of Table S2

## 5. General PMO Synthesis Cycle in Solid phase<sup>a,3</sup> :

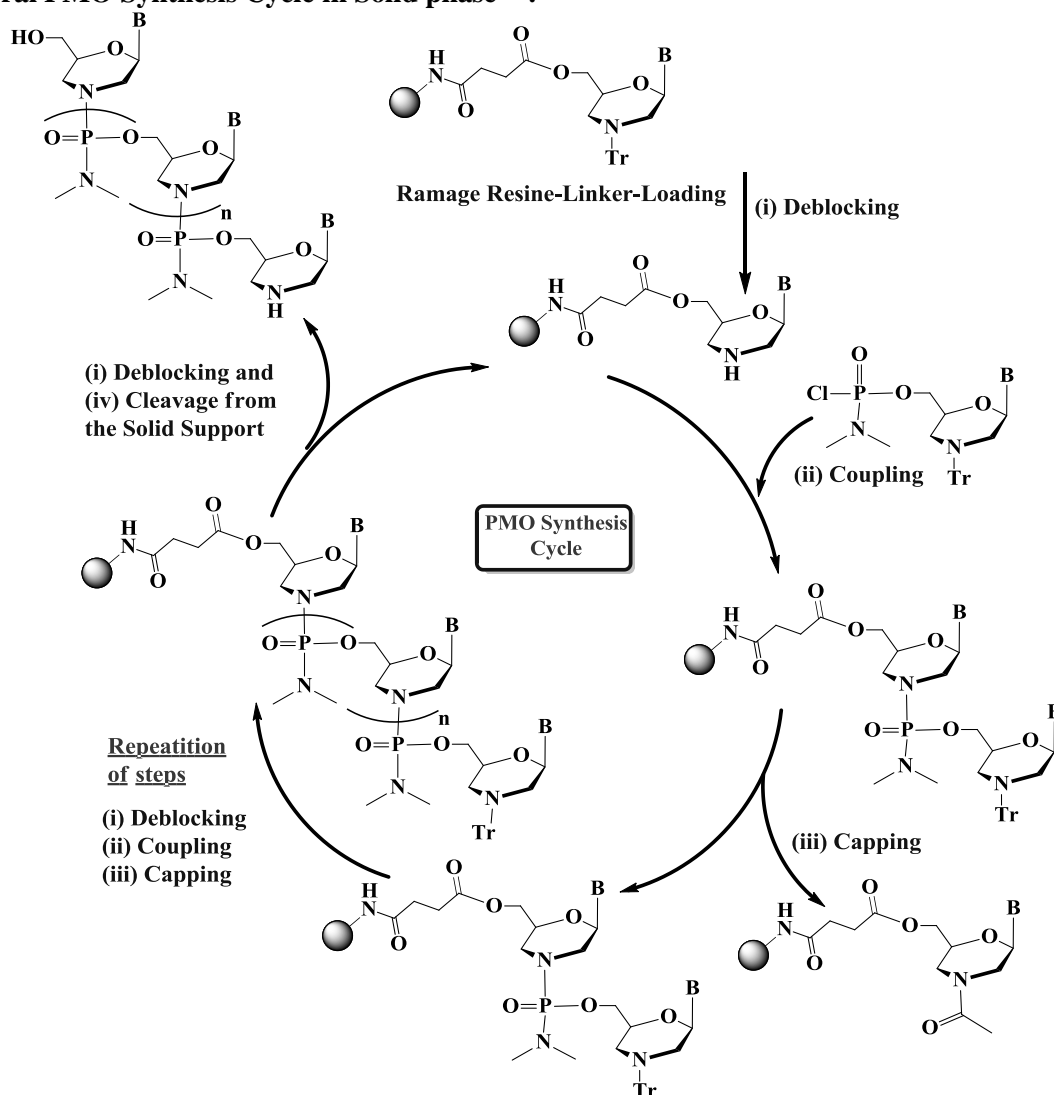

**Figure S5:** PMO synthesis cycle in solid phase

<sup>a</sup>Reagents and conditions **(i) Deblocking:** CYPTFA (3-cyano pyridine, TFA, Trifluoro ethanol, DCM) 3 x 1 min = 3 min; **(ii) Coupling:** Chlorophosphoramidate morpholino monomer, ETT (5-ethylthio tetrazole and NEM (4-ethyl morpholine), NMP, 30 min, for functionalized chlorophosphoramidate morpholino monomer (3 x 30 min = 1.5 hr) **(iii) Capping:** (1:1)- 10% Ac<sub>2</sub>O-NMP and 10% DIPEA-NMP (3 x 1 = 3 min); **(iv) Cleavage from the solid support:** 30% aq NH<sub>3</sub>, 55°C, 16 h .

## 6. HPLC chromatogram of the crude PMO-8 in Trityl on mode:

5'-TTTTACTCACAT-Tr-3'(C-Ph-Acetylene, 6b) (PMO-8-Tr)

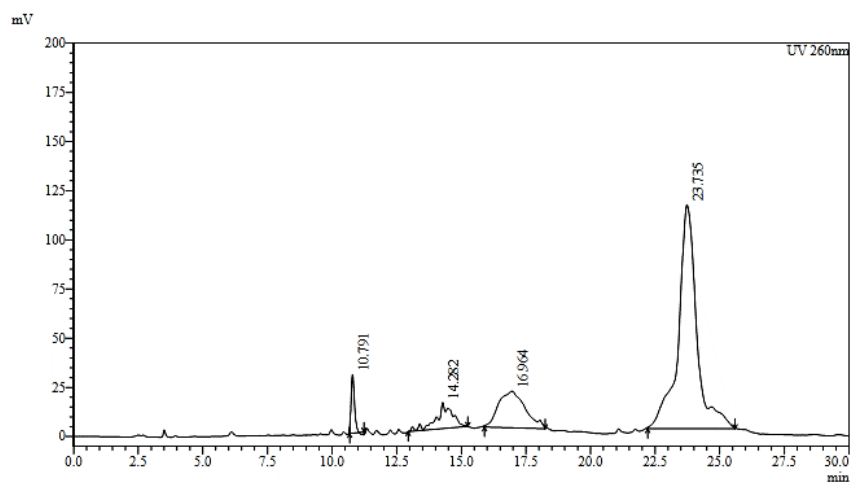

**Peak Table**

| UV 260nm     |           |                |               |                |
|--------------|-----------|----------------|---------------|----------------|
| Peak#        | Ret. Time | Area           | Height        | Area%          |
| 1            | 10.791    | 260701         | 29884         | 3.327          |
| 2            | 14.282    | 552895         | 13348         | 7.056          |
| 3            | 16.964    | 1339907        | 18596         | 17.100         |
| 4            | 23.735    | 5682070        | 113857        | 72.516         |
| <b>Total</b> |           | <b>7835573</b> | <b>175685</b> | <b>100.000</b> |

**Figure S6:** HPLC analysis of crude mixture of **PMO-8-Tr** in trityl on mode. HPLC was carried out by C-18 (Agilent) column using 0.1M Ammonium acetate buffer (in H<sub>2</sub>O)-CH<sub>3</sub>CN gradient system (10-50%) as eluent (Flow rate = 1ml / min)

## 7. HPLC and Mass analysis of the oligonucleotides:

| Sequence                                                     | HPLC Pure Yield (%) | Molecular formula                                                                                                 | Calculated mass | Observed mass | HPLC Retention Time $R_t$ (min) |
|--------------------------------------------------------------|---------------------|-------------------------------------------------------------------------------------------------------------------|-----------------|---------------|---------------------------------|
| 5'-TTTTACTCACAT-3' <sup>a</sup><br>(PMO-1)                   |                     |                                                                                                                   |                 |               | 11.7                            |
| 5'-TTTTACTCACAT-3'<br>(C-Acetylene,6a)(PMO-2)                | 25                  | C <sub>141</sub> H <sub>218</sub> N <sub>59</sub> Na <sub>3</sub> O <sub>50</sub> P <sub>11</sub>                 | 3947.314        | 3946.176      | 12.2                            |
| 5'-TTTTACUCACAT-3'<br>(U-Acetylene,7b)(PMO-3)                | 22                  | C <sub>140</sub> H <sub>218</sub> N <sub>59</sub> Na <sub>2</sub> O <sub>50</sub> P <sub>11</sub>                 | 3945.494        | 3945.204      | 12.3                            |
| 5'-TUTTACTCACAT-3'<br>(U-Acetylene,7b)(PMO-4)                | 30                  | C <sub>140</sub> H <sub>217</sub> K <sub>2</sub> N <sub>59</sub> O <sub>50</sub> P <sub>11</sub>                  | 3912.324        | 3912.043      | 11.7                            |
| 5'-TUTTACTCACAT-3'<br>(Acetylene,7b,6a)(PMO-5)               | 21                  | C <sub>142</sub> H <sub>217</sub> N <sub>59</sub> Na <sub>2</sub> O <sub>50</sub> P <sub>11</sub>                 | 3937.299        | 3937.143      | 12.2                            |
| 5'-TTTTACUCACAT-3'<br>(Acetylene,7b,6a)(PMO-6)               | 18                  | C <sub>142</sub> H <sub>216</sub> KN <sub>59</sub> Na <sub>3</sub> O <sub>50</sub> P <sub>11</sub>                | 3998.379        | 3997.367      | 12.4                            |
| 5'-TTTTACTCACAT-3'<br>(C-Acetylene,6a)(PMO-7)                | 20                  | C <sub>143</sub> H <sub>218</sub> N <sub>59</sub> Na <sub>2</sub> O <sub>50</sub> P <sub>11</sub>                 | 3948.324        | 3948.236      | 14.5                            |
| 5'-TTTTACTCACAT-3'<br>(C-Ph-Acetylene,6b)(PMO-8)             | 27                  | C <sub>147</sub> H <sub>224</sub> N <sub>59</sub> O <sub>50</sub> P <sub>11</sub>                                 | 3958.428        | 3958.656      | 14.4                            |
| 5'-TTTTACUCACAT-3'<br>(U-Ph-Acetylene,7c)(PMO-9)             | 24                  | C <sub>146</sub> H <sub>220</sub> K <sub>4</sub> N <sub>59</sub> NaO <sub>50</sub> P <sub>11</sub>                | 4119.205        | 4120.251      | 13.9                            |
| 5'-TTTTACTCACAT-3'<br>(C-Phenyl,6j)(PMO-10)                  | 28                  | C <sub>145</sub> H <sub>222</sub> K <sub>2</sub> N <sub>59</sub> NaO <sub>50</sub> P <sub>11</sub>                | 4031.293        | 4032.393      | 12.5                            |
| 5'-TTTTACUCACAT-3'<br>(U-Phenyl,7d)(PMO-11)                  | 26                  | C <sub>144</sub> H <sub>220</sub> K <sub>3</sub> N <sub>59</sub> NaO <sub>50</sub> P <sub>11</sub>                | 4056.241        | 4057.995      | 13.3                            |
| 5'-TTTTACTCACAT-3'<br>(C-Phenyl-CF <sub>3</sub> ,6e)(PMO-12) | 30                  | C <sub>146</sub> H <sub>221</sub> F <sub>3</sub> K <sub>2</sub> N <sub>59</sub> NaO <sub>50</sub> P <sub>11</sub> | 4101.575        | 4101.682      | 14.6                            |
| 5'-TTTTACUCACAT-3'<br>(U-Phenyl-CF <sub>3</sub> ,7f)(PMO-13) | 29                  | C <sub>145</sub> H <sub>219</sub> F <sub>3</sub> N <sub>59</sub> Na <sub>3</sub> O <sub>50</sub> P <sub>11</sub>  | 4053.317        | 4050.514      | 15.2                            |
| 5'-TTTTACTCACAT-3'<br>(C-Phenyl-OMe,6h)(PMO-14)              | 29                  | C <sub>146</sub> H <sub>225</sub> N <sub>59</sub> Na <sub>2</sub> O <sub>51</sub> P <sub>11</sub>                 | 4007.374        | 4007.161      | 13.3                            |
| 5'-TTTTACUCACAT-3'<br>(U-Phenyl-OMe,6e)(PMO-15)              | 27                  | C <sub>145</sub> H <sub>224</sub> K <sub>2</sub> N <sub>59</sub> O <sub>51</sub> P <sub>11</sub>                  | 4026.314        | 4026.208      | 13.5                            |
| 5'-TTTTACTCACAT-3'<br>(C-Naphthyl,6g)(PMO-16)                | 28                  | C <sub>149</sub> H <sub>224</sub> N <sub>59</sub> NaO <sub>50</sub> P <sub>11</sub>                               | 4003.381        | 4002.551      | 13.8                            |
| 5'-TTTTACUCACAT-3'<br>(U-Naphthyl,7g)(PMO-17)                | 24                  | C <sub>148</sub> H <sub>223</sub> N <sub>59</sub> NaO <sub>50</sub> P <sub>11</sub>                               | 3990.373        | 3990.059      | 13.1                            |
| 5'-TTTTACCTACAT-3'<br>(C-Acetylene,6a)(PMO-23)               | 24                  | C <sub>141</sub> H <sub>218</sub> K <sub>3</sub> N <sub>59</sub> O <sub>50</sub> P <sub>11</sub>                  | 3997.611        | 3997.079      | 13.6                            |
| 5'-TTTTACCUACAT-3'<br>(U-Acetylene,7b)(PMO-24)               | 21                  | C <sub>140</sub> H <sub>216</sub> K <sub>4</sub> N <sub>59</sub> Na <sub>2</sub> O <sub>50</sub> P <sub>11</sub>  | 4068.662        | 4068.270      | 11.6                            |

**Table S3:** HPLC retention time and MALDI-TOF mass of the oligonucleotides (PMO1-PMO17, PMO23 and 24).

| Sequence                                                                      | HPLC Pure Yield (%) | Molecular formula                    | Calculated mass | Observed mass | HPLC Retention Time $R_t$ (min) |
|-------------------------------------------------------------------------------|---------------------|--------------------------------------|-----------------|---------------|---------------------------------|
| 5'-TTTTACUCACAT-3'<br>U-iodo,7i (PMO-18)                                      | 22                  | $C_{138}H_{213}IN_{59}O_{50}P_{11}$  | 1982.1          | 1982.4        | 12.7                            |
| 5'-TTTTACUCACAT-3'<br>m5C,6k (PMO-19)                                         | 26                  | $C_{140}H_{221}N_{59}NaO_{50}P_{11}$ | 1947.1          | 1948.1        | 13.0                            |
| 5'-TTTTACUCACAT-3'<br>C-iodo,6l (PMO-20)                                      | 24                  | $C_{139}H_{219}IN_{59}O_{50}P_{11}$  | 1989.1          | 1989.3        | 12.6                            |
| 5'-TTTTACCCACAT-3'<br>(Single mismatch Regular PMO)(PMO-21)                   | 29                  | $C_{138}H_{219}N_{60}O_{49}P_{11}$   | 1918.7          | 1919.0        | 10.9                            |
| 5'-TTTTACCCACAT-3'<br>(Single mismatch modified PMO)(C-Acetylene,6a)( PMO-22) | 23                  | $C_{140}H_{219}N_{60}O_{49}P_{11}$   | 1930.7          | 1931.0        | 12.9                            |

**Table S4:** HPLC retention time and LCMS mass of the oligonucleotides (PMO18-PMO22).

HPLC purification of the functionalized 12-mer morpholino oligonucleotides was done on Shimadzu SP-20AD system with C18 (Ascentis) column using 0.1M Ammonium acetate buffer (in H<sub>2</sub>O)-CH<sub>3</sub>CN gradient system (10-50%) (2 ml/min).

<sup>a</sup> Reference-3

(A)

**Chromatogram**

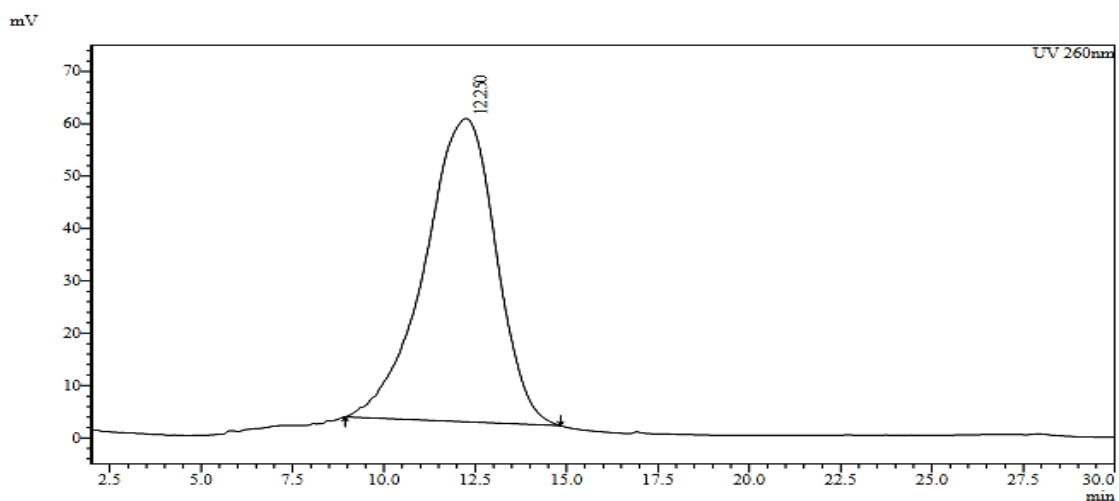

**Peak Table**

| UV 260nm |           |         |        |         |
|----------|-----------|---------|--------|---------|
| Peak#    | Ret. Time | Area    | Height | Area%   |
| 1        | 12.250    | 7887212 | 57975  | 100.000 |
| Total    |           | 7887212 | 57975  | 100.000 |

(B)

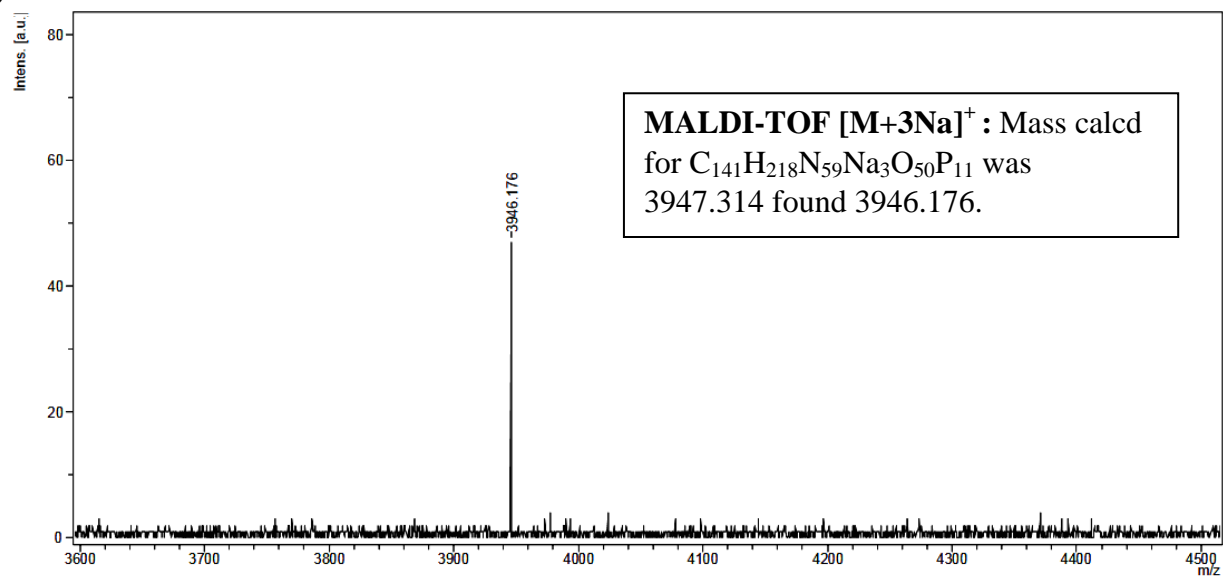

**Figure S7:** (A) HPLC Chromatogram of PMO 2 [5'-TTTTACTCACAT-3' (C-Acetylene, 6a)], (B) MALDI-TOF spectrum of PMO 2.



(A) **Chromatogram**

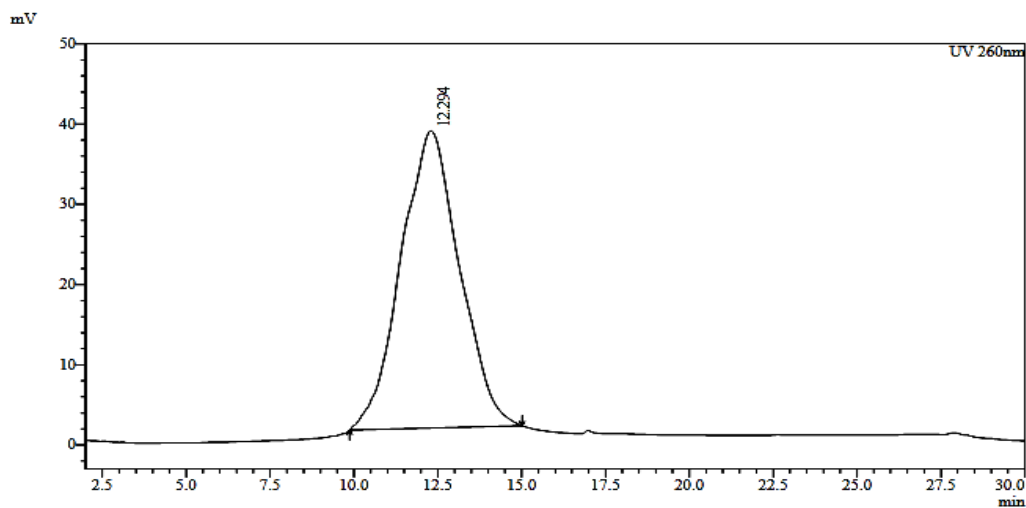

**Peak Table**

| UV 260nm |           |         |        |         |
|----------|-----------|---------|--------|---------|
| Peak#    | Ret. Time | Area    | Height | Area%   |
| 1        | 12.294    | 4507048 | 37032  | 100.000 |
| Total    |           | 4507048 | 37032  | 100.000 |

(B)

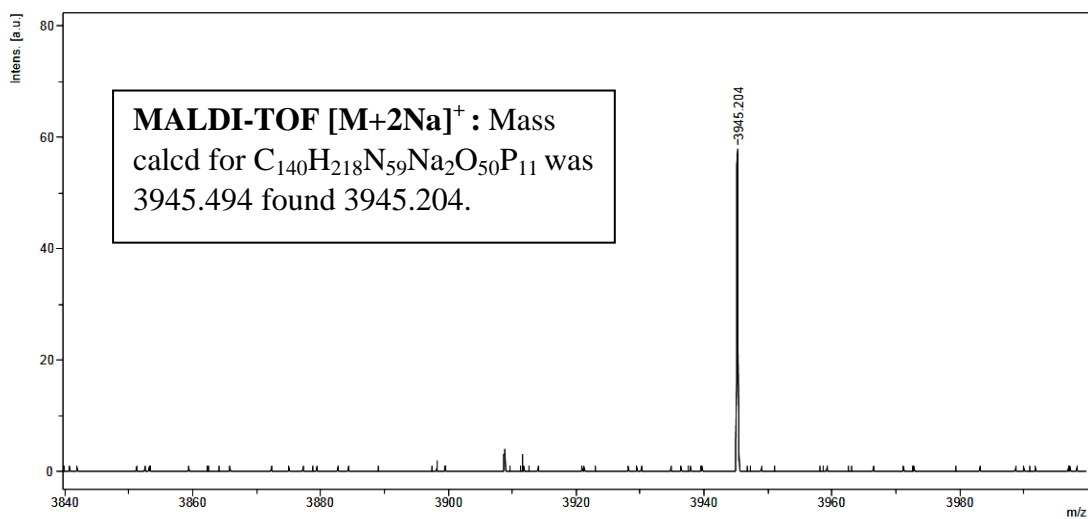

**Figure S8:** (A) HPLC Chromatogram of PMO 3 [5'-TTTTACUCACAT-3' (U-Acetylene, **7b**)], (B) MALDI-TOF spectrum of PMO 3.

(A) Chromatogram

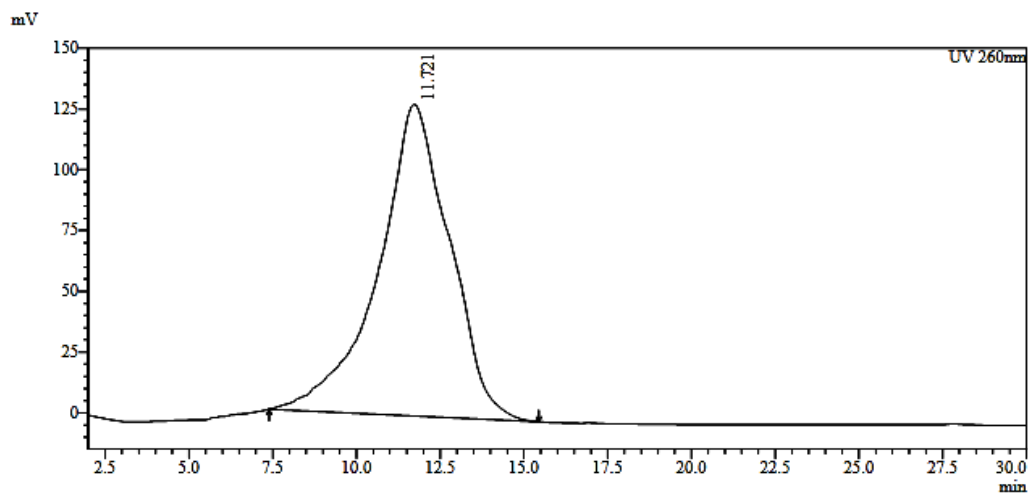

Peak Table

| UV 260nm |           |          |        |         |
|----------|-----------|----------|--------|---------|
| Peak#    | Ret. Time | Area     | Height | Area%   |
| 1        | 11.721    | 19030365 | 128176 | 100.000 |
| Total    |           | 19030365 | 128176 | 100.000 |

(B)

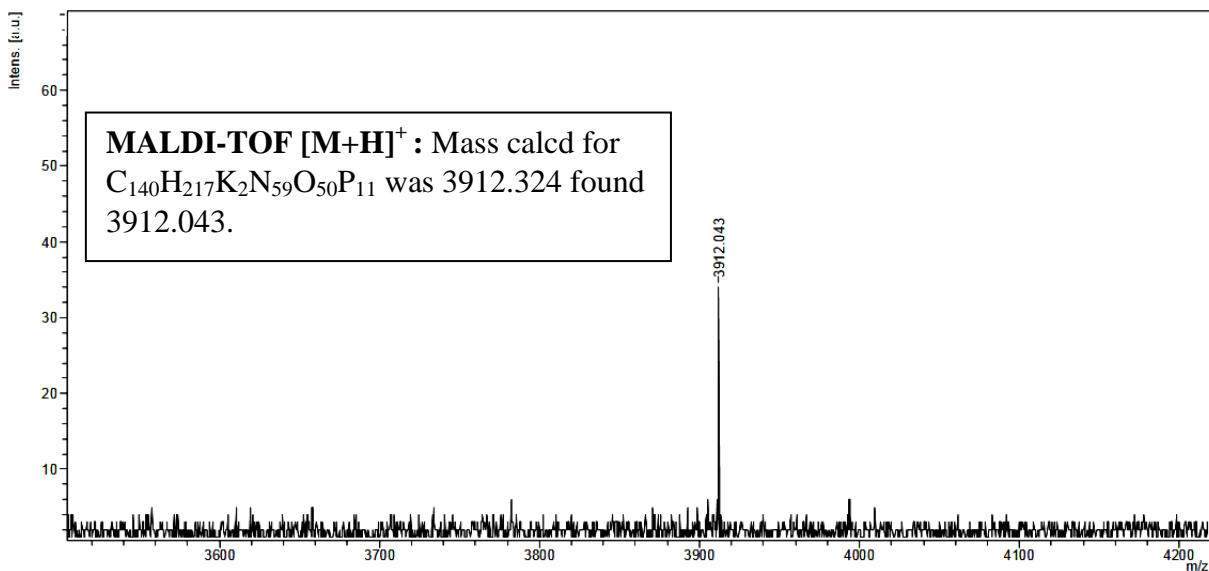

Figure S9: (A) HPLC Chromatogram of PMO 4 [5'-TUTTACTCACAT-3' (U-Acetylene, 7b)], (B) MALDI-TOF spectrum of PMO 4.

(A) **Chromatogram**

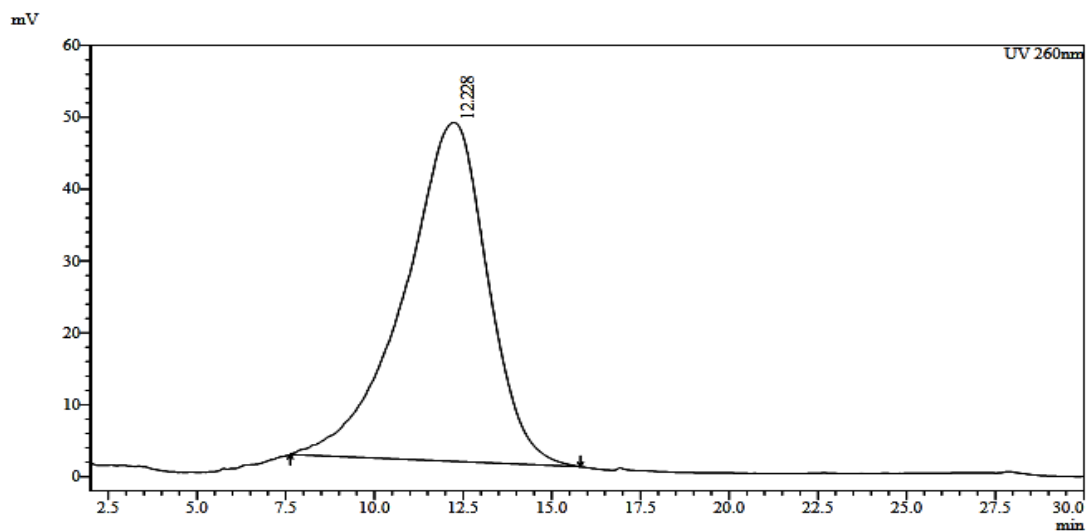

**Peak Table**

| UV 260nm |           |         |        |         |
|----------|-----------|---------|--------|---------|
| Peak#    | Ret. Time | Area    | Height | Area%   |
| 1        | 12.228    | 7697301 | 47152  | 100.000 |
| Total    |           | 7697301 | 47152  | 100.000 |

(B)

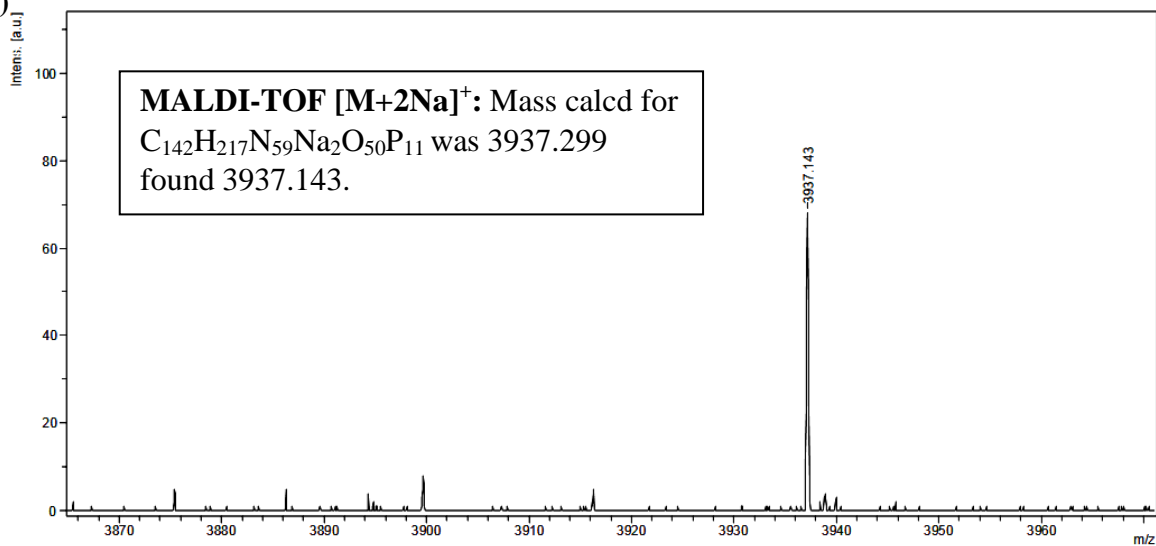

**Figure S10:** (A) HPLC Chromatogram of PMO 5 [5'-TUTTACTCACAT-3' (Acetylene, 7b, 6a)], (B) MALDI-TOF spectra of PMO 5.

(A) **Chromatogram**

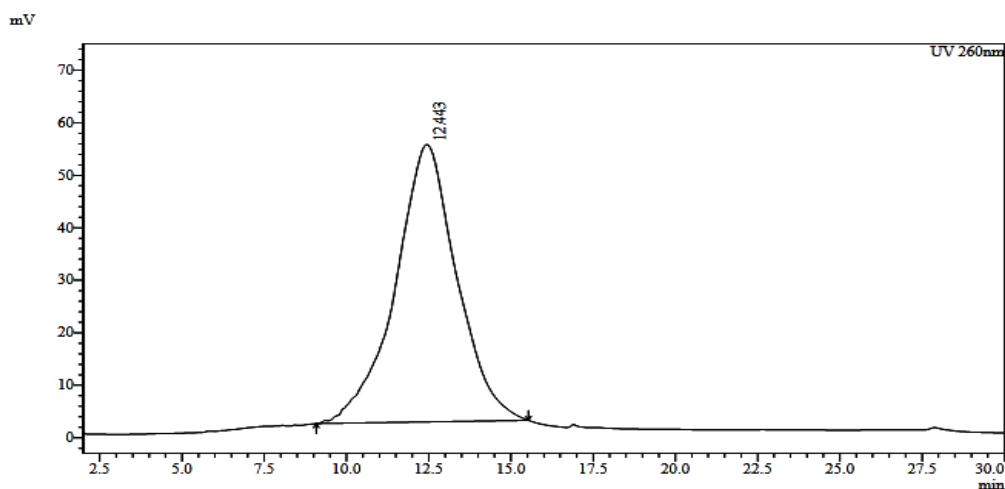

**Peak Table**

| UV 260nm |           |         |        |         |
|----------|-----------|---------|--------|---------|
| Peak#    | Ret. Time | Area    | Height | Area%   |
| 1        | 12.443    | 6873592 | 52831  | 100.000 |
| Total    |           | 6873592 | 52831  | 100.000 |

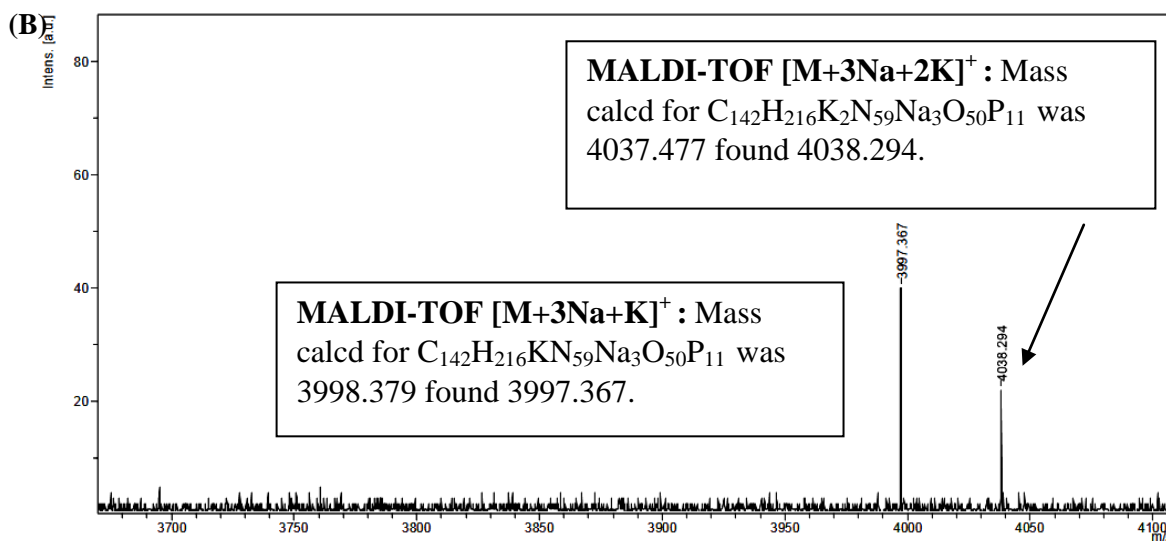

**Figure S11:** (A) HPLC Chromatogram of PMO 6 [5'-TTTTACUCACAT-3' (Acetylene, 7b, 6a)], (B) MALDI-TOF spectrum of PMO 6.

(A) **Chromatogram**

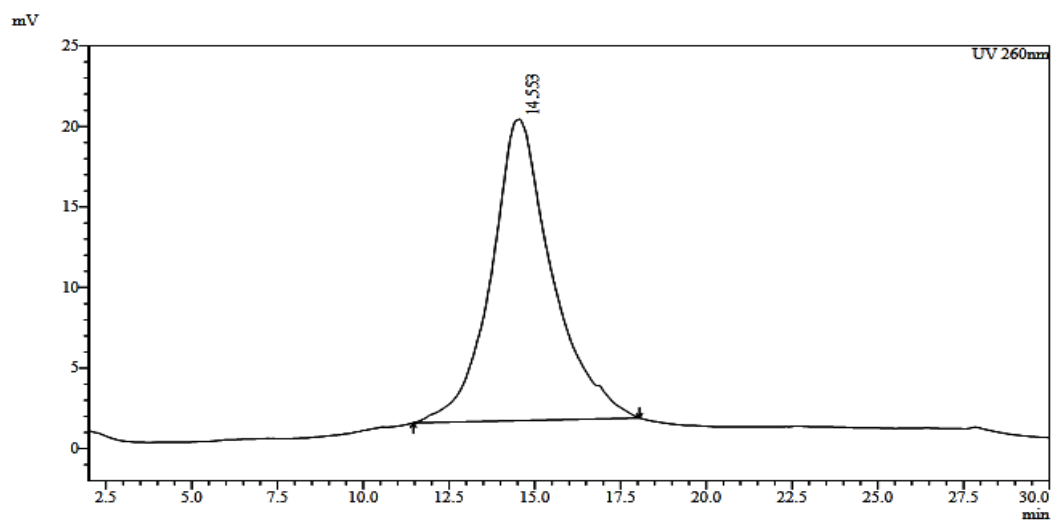

**Peak Table**

| UV 260nm |           |         |        |         |
|----------|-----------|---------|--------|---------|
| Peak#    | Ret. Time | Area    | Height | Area%   |
| 1        | 14.553    | 2316527 | 18699  | 100.000 |
| Total    |           | 2316527 | 18699  | 100.000 |

(B)

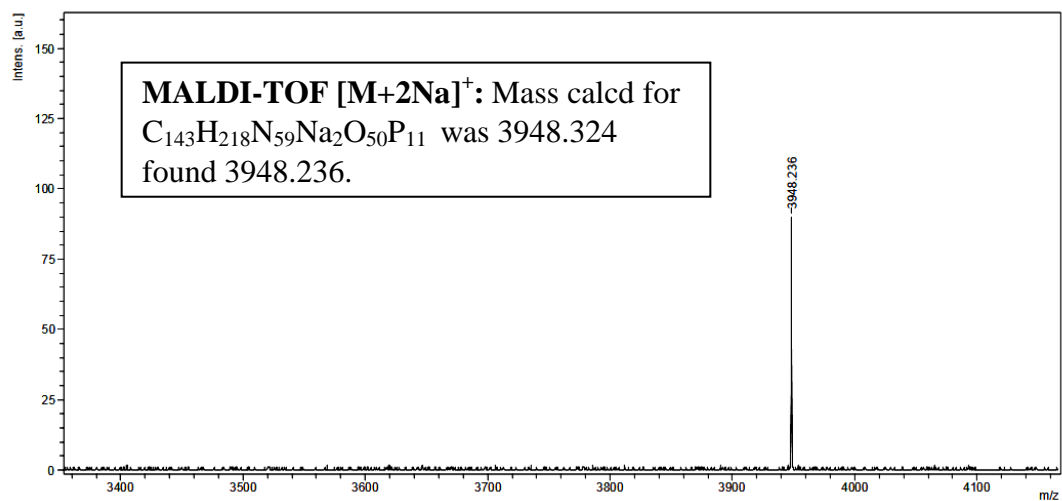

**Figure S12:** (A) HPLC Chromatogram of PMO 7 [5'-TTTTACTCACAT-3' (C-Acetylene, 6a)], (B) MALDI-TOF spectrum of PMO 7.

(A) **Chromatogram**

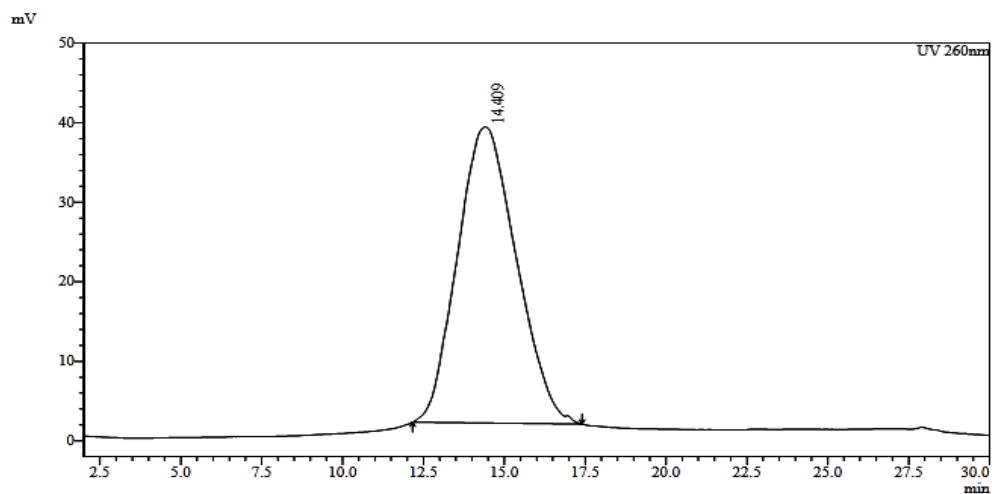

**Peak Table**

| UV 260nm |           |         |        |         |
|----------|-----------|---------|--------|---------|
| Peak#    | Ret. Time | Area    | Height | Area%   |
| 1        | 14.409    | 4729493 | 37244  | 100.000 |
| Total    |           | 4729493 | 37244  | 100.000 |

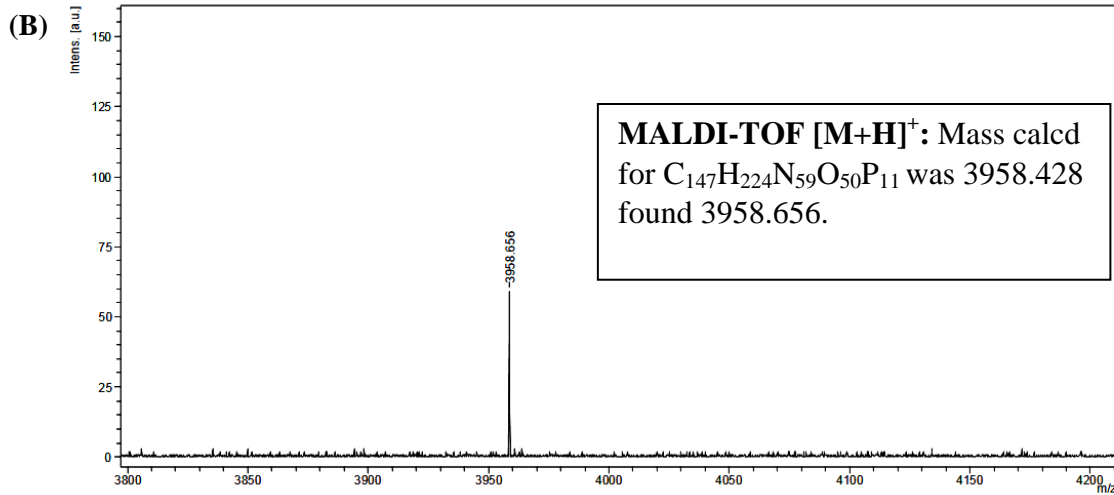

**Figure S13:** (A) HPLC Chromatogram of PMO 8 [5'-TTTTACTCACAT-3' (C-Ph-Acetylene, 6b)], (B) MALDI-TOF spectrum of PMO 8.

(A) Chromatogram

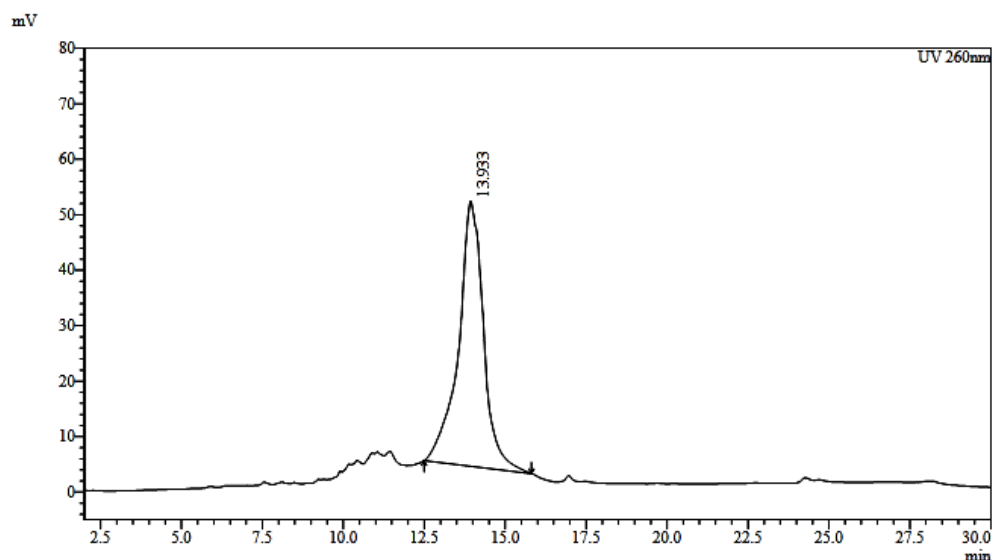

Peak Table

| UV 260nm |           |         |        |         |
|----------|-----------|---------|--------|---------|
| Peak#    | Ret. Time | Area    | Height | Area%   |
| 1        | 13.933    | 2578103 | 47793  | 100.000 |
| Total    |           | 2578103 | 47793  | 100.000 |

(B)

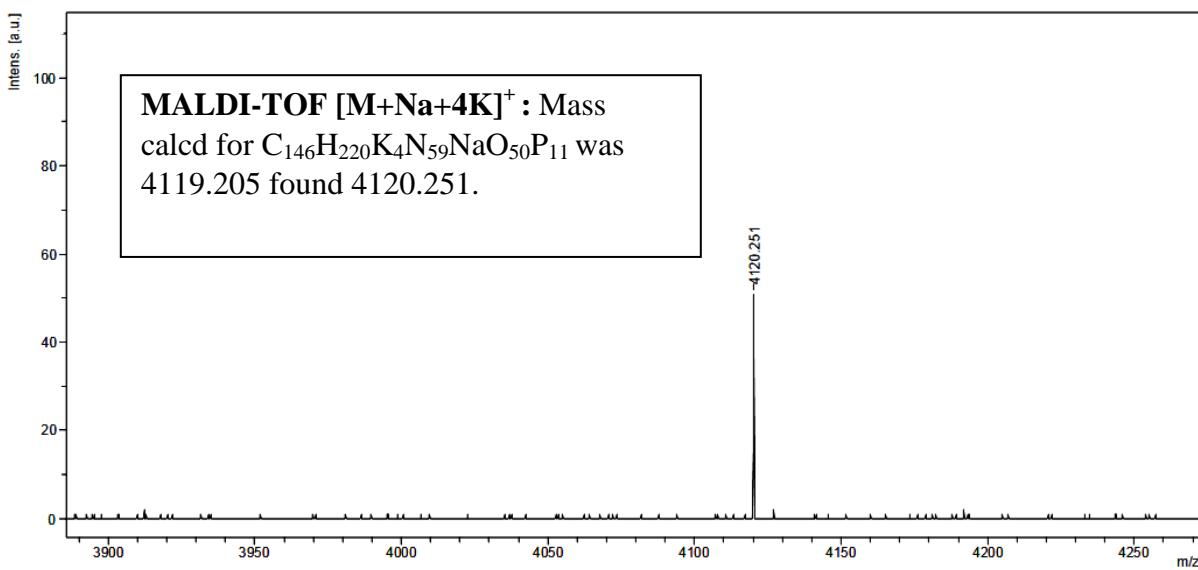

Figure S14: (A) HPLC Chromatogram of PMO 9 [5'-TTTTACUCACAT-3' (U-Ph-Acetylene, 7c), (B) MALDI-TOF spectrum of PMO 9.

(A) **Chromatogram**

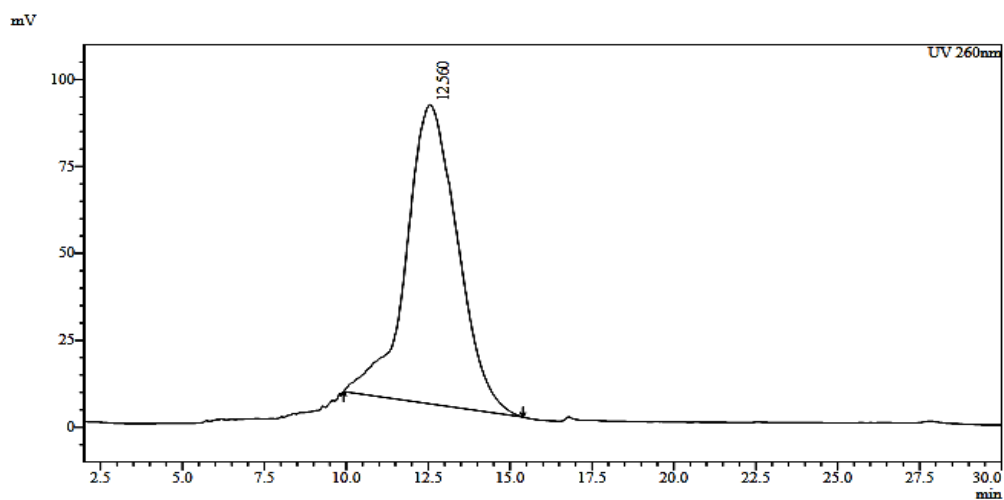

**Peak Table**

| UV 260nm |           |         |        |         |
|----------|-----------|---------|--------|---------|
| Peak#    | Ret. Time | Area    | Height | Area%   |
| 1        | 12.560    | 9456213 | 86038  | 100.000 |
| Total    |           | 9456213 | 86038  | 100.000 |

(B)

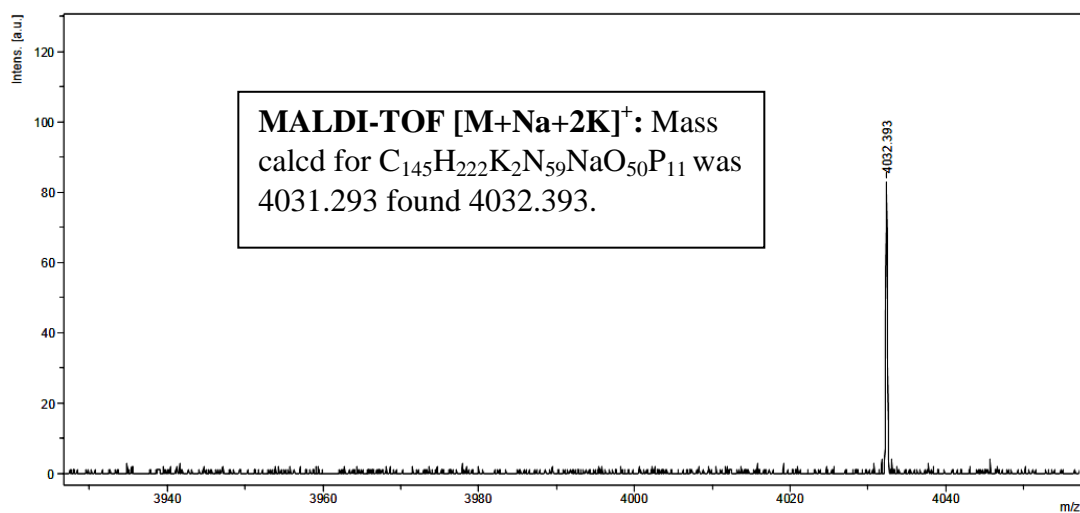

**Figure S15:** (A) HPLC Chromatogram of PMO 10 [5'-TTTTACTCACAT-3' (C-Phenyl, 6j)], (B) MALDI-TOF spectrum of PMO 10.



(A) **Chromatogram**

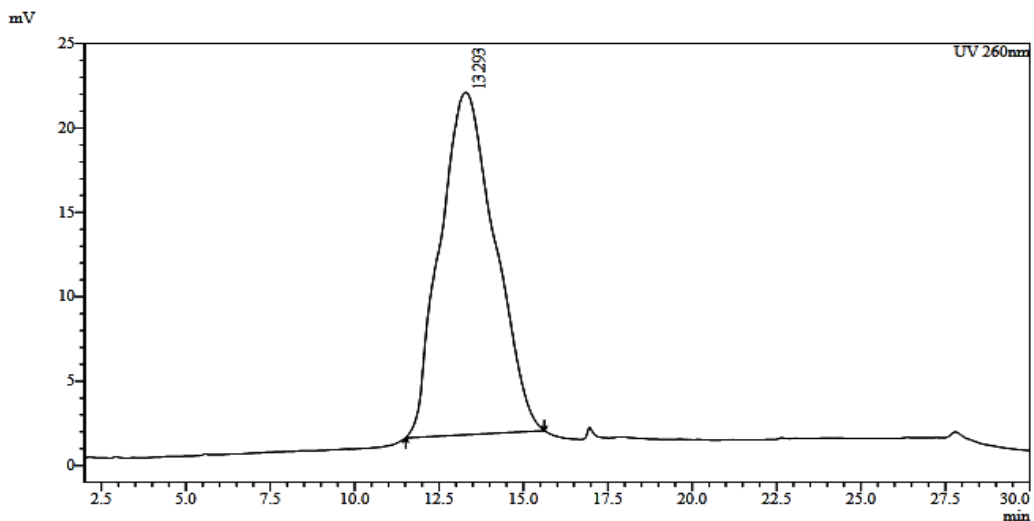

**Peak Table**

| UV 260nm     |           |                |              |                |
|--------------|-----------|----------------|--------------|----------------|
| Peak#        | Ret. Time | Area           | Height       | Area%          |
| 1            | 13.293    | 2292479        | 20285        | 100.000        |
| <b>Total</b> |           | <b>2292479</b> | <b>20285</b> | <b>100.000</b> |

(B)

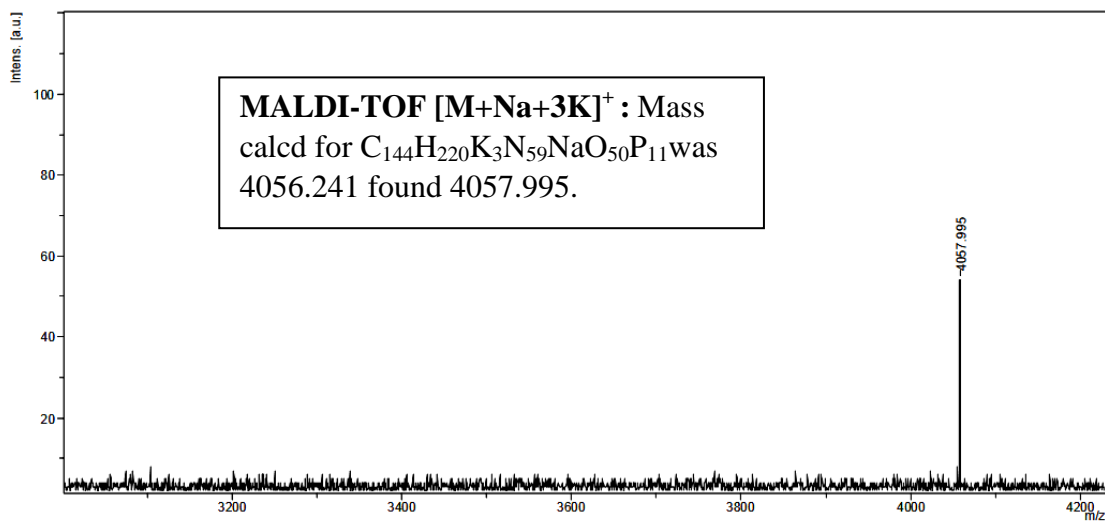

**Figure S16:** (A) HPLC Chromatogram of PMO 11 [5'-TTTTACUCACAT-3' (U-Phenyl, 7d)], (B) MALDI-TOF spectrum of PMO 11.

(A) **Chromatogram**

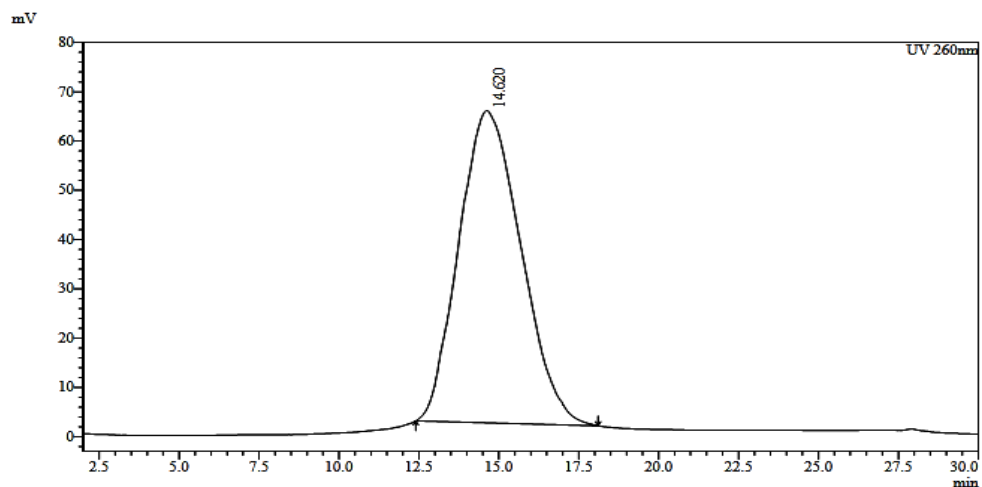

**Peak Table**

| UV 260nm |           |         |        |         |
|----------|-----------|---------|--------|---------|
| Peak#    | Ret. Time | Area    | Height | Area%   |
| 1        | 14.620    | 8594840 | 63377  | 100.000 |
| Total    |           | 8594840 | 63377  | 100.000 |

(B)

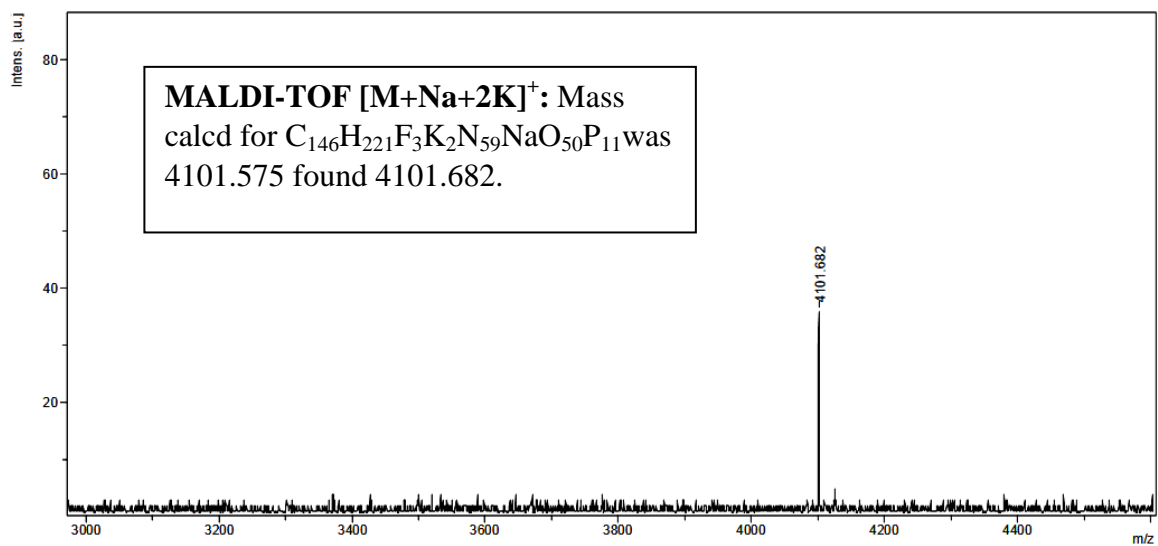

**Figure S17:** (A) HPLC Chromatogram of PMO 12 [5'-TTTTACTCACAT-3' (C-Phenyl-CF<sub>3</sub>, 6e)], (B) MALDI-TOF spectrum of PMO 12.

(A) Chromatogram

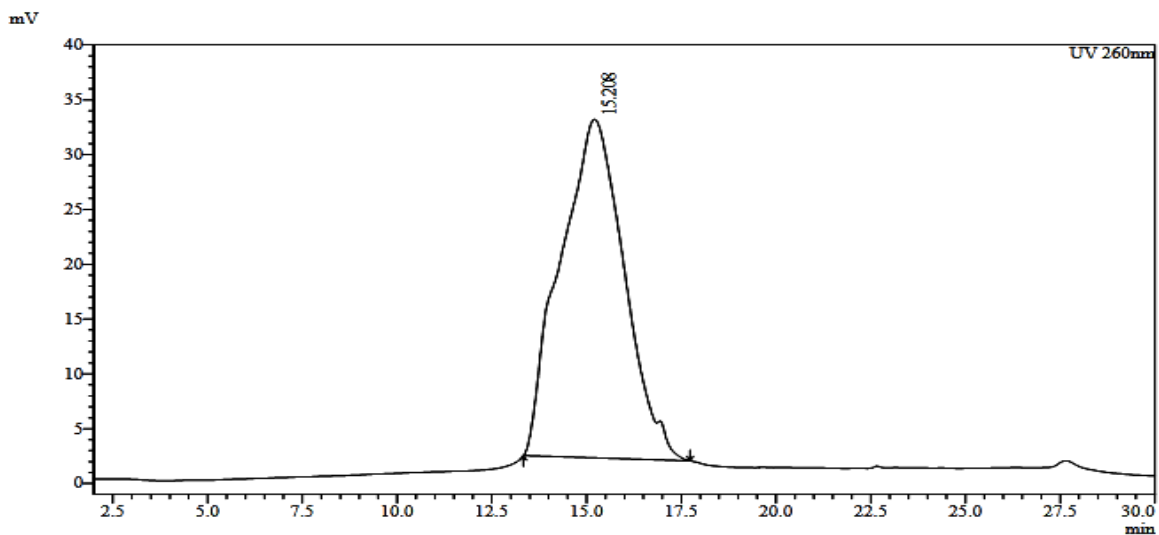

Peak Table

| UV 260nm |           |         |        |         |
|----------|-----------|---------|--------|---------|
| Peak#    | Ret. Time | Area    | Height | Area%   |
| I        | 15.208    | 3610020 | 30860  | 100.000 |
| Total    |           | 3610020 | 30860  | 100.000 |

(B)

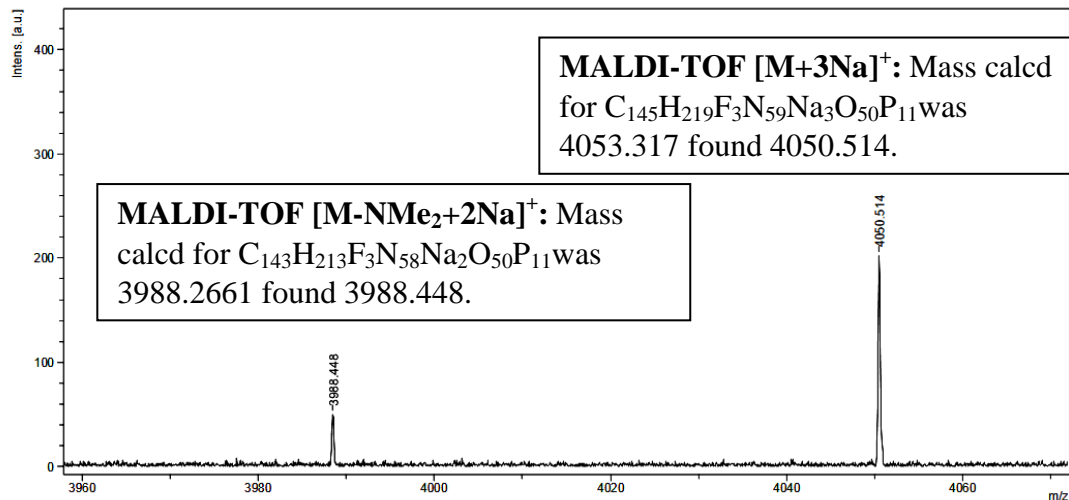

Figure S18: (A) HPLC Chromatogram of PMO 13 [5'-TTTTACUCACAT-3' (U-Phenyl-CF<sub>3</sub>, 7f)], (B) MALDI-TOF spectrum of PMO 13.

(A) **Chromatogram**

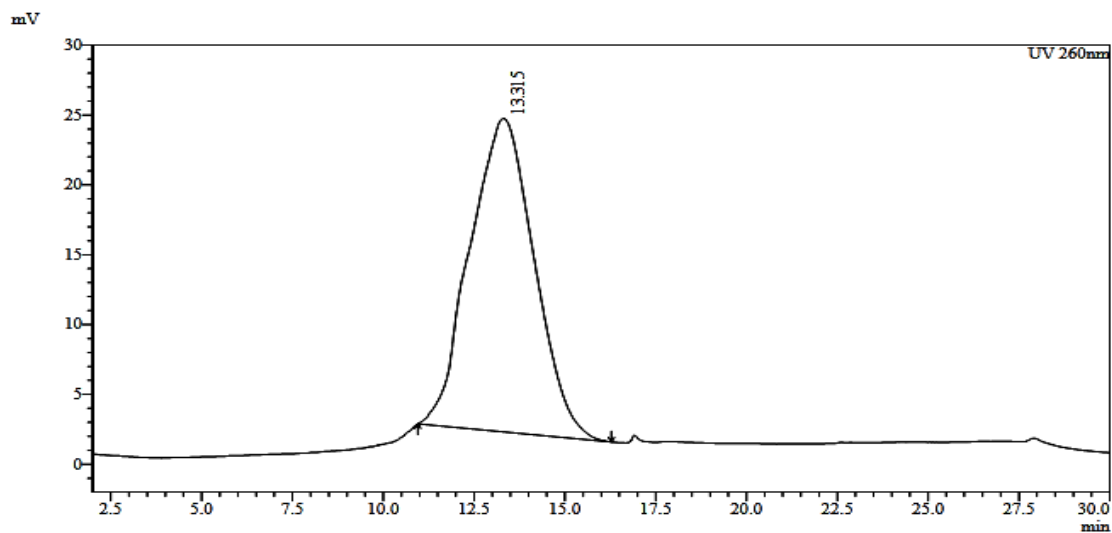

**Peak Table**

| UV 260nm |           |         |        |         |
|----------|-----------|---------|--------|---------|
| Peak#    | Ret. Time | Area    | Height | Area%   |
| 1        | 13.315    | 2763215 | 22435  | 100.000 |
| Total    |           | 2763215 | 22435  | 100.000 |

(B)

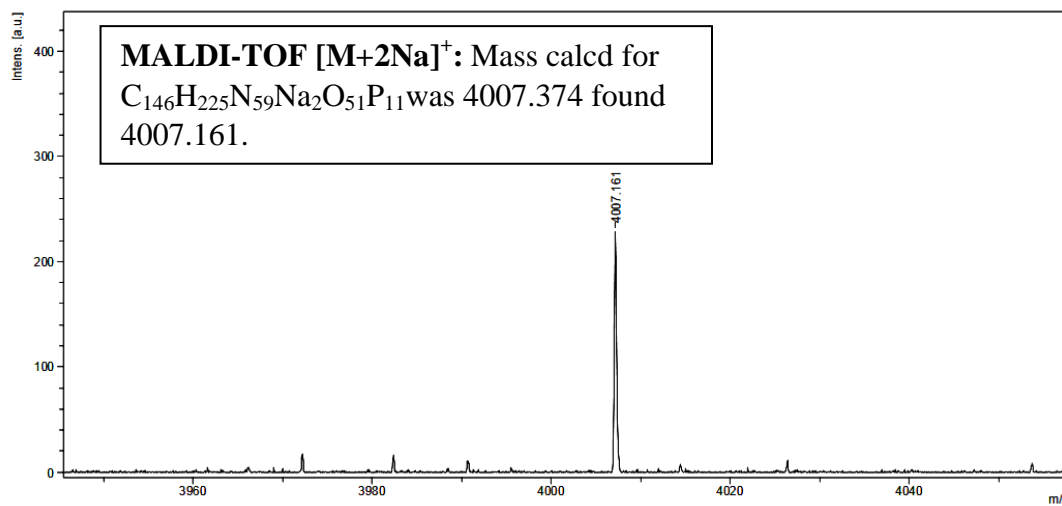

**Figure S19:** (A) HPLC Chromatogram of PMO 14 [5'-TTTTACTCACAT-3'(C-Phenyl-OMe, 6h)], (B) MALDI-TOF spectrum of PMO 14.

(A) **Chromatogram**

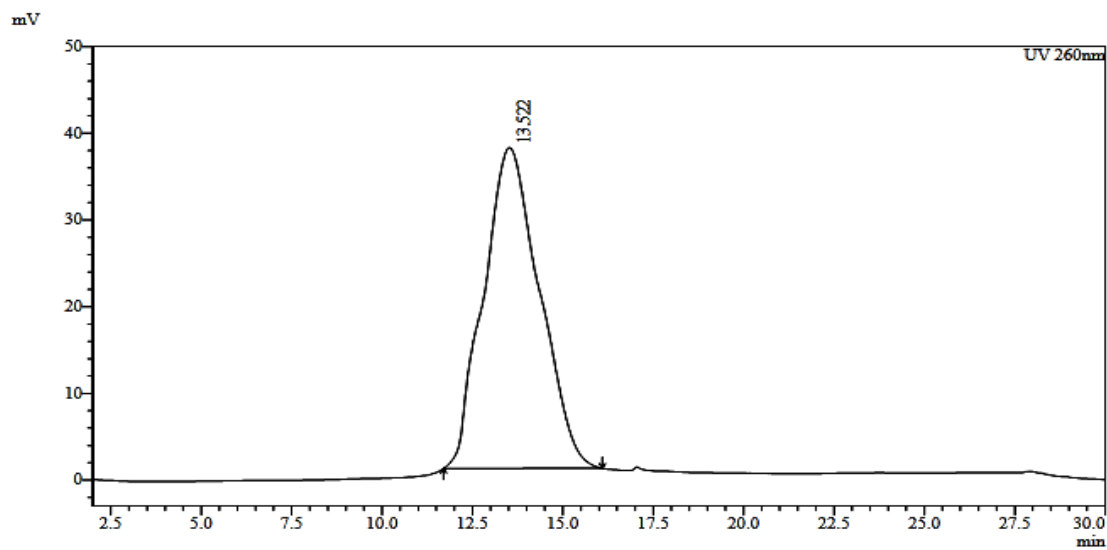

**Peak Table**

| UV 260nm |           |         |        |         |
|----------|-----------|---------|--------|---------|
| Peak#    | Ret. Time | Area    | Height | Area%   |
| 1        | 13.522    | 3980289 | 36993  | 100.000 |
| Total    |           | 3980289 | 36993  | 100.000 |

(B)

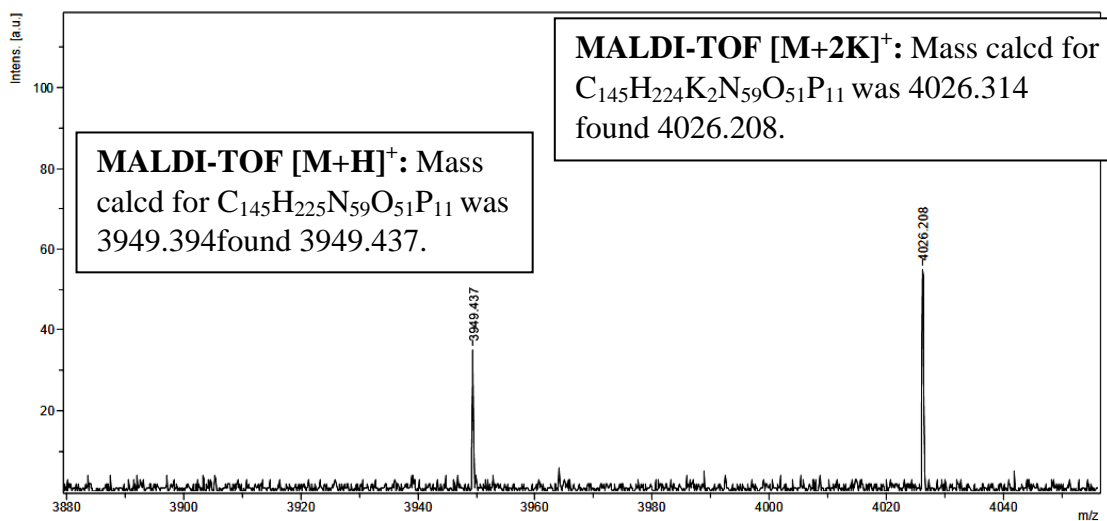

**Figure S20:** (A) HPLC Chromatogram of PMO 15 [5'-TTTTACUCACAT-3' (U-Phenyl-OMe, 6e)], (B) MALDI-TOF spectrum of PMO 15.

(A) Chromatogram

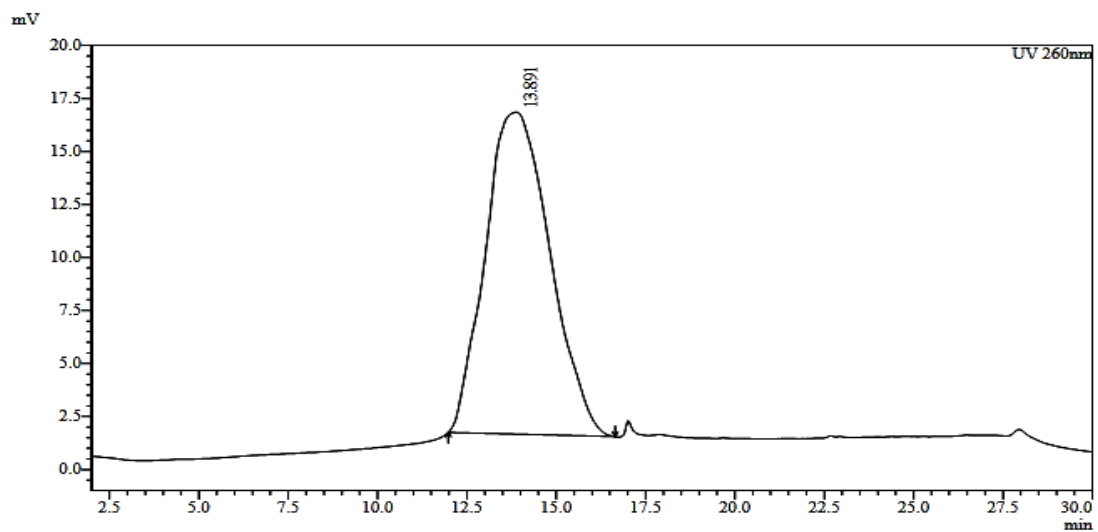

Peak Table

| UV 260nm |           |         |        |         |
|----------|-----------|---------|--------|---------|
| Peak#    | Ret. Time | Area    | Height | Area%   |
| 1        | 13.891    | 1917308 | 15188  | 100.000 |
| Total    |           | 1917308 | 15188  | 100.000 |

(B)

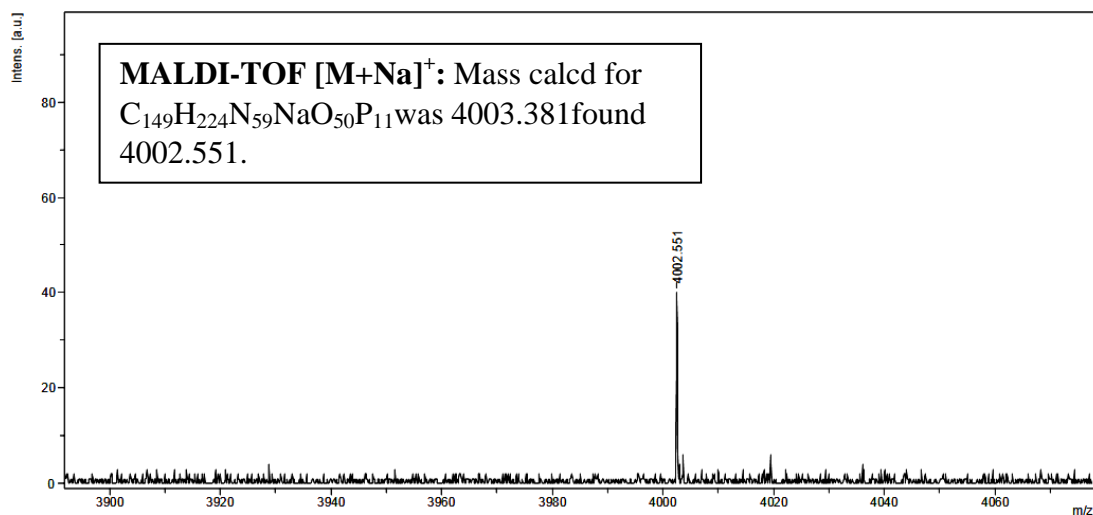

Figure S21: (A) HPLC Chromatogram of PMO 16 [5'-TTTTACTCACAT-3' (C-Naphthyl, 6g)], (B) MALDI-TOF spectrum of PMO 16.

(A)

### Chromatogram

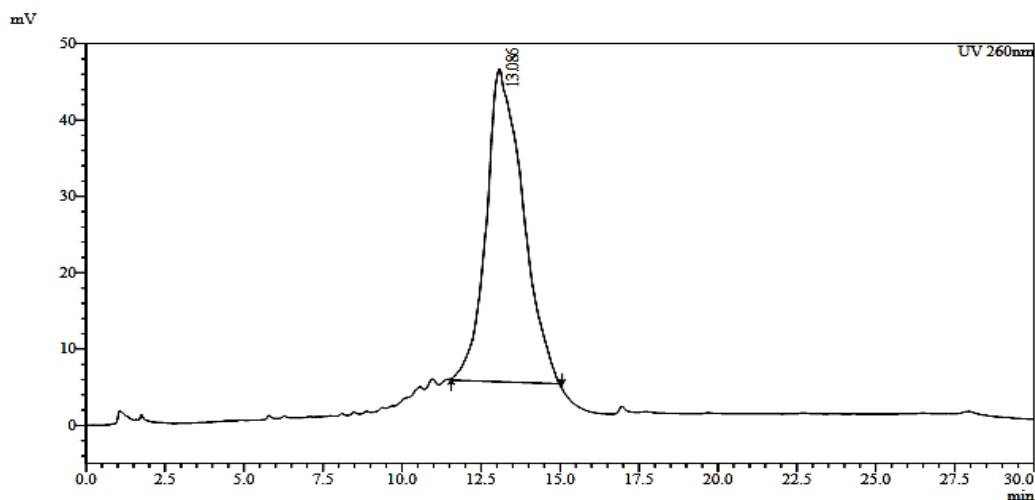

### Peak Table

| UV 260nm |           |         |        |         |
|----------|-----------|---------|--------|---------|
| Peak#    | Ret. Time | Area    | Height | Area%   |
| 1        | 13.086    | 3323186 | 40984  | 100.000 |
| Total    |           | 3323186 | 40984  | 100.000 |

(B)

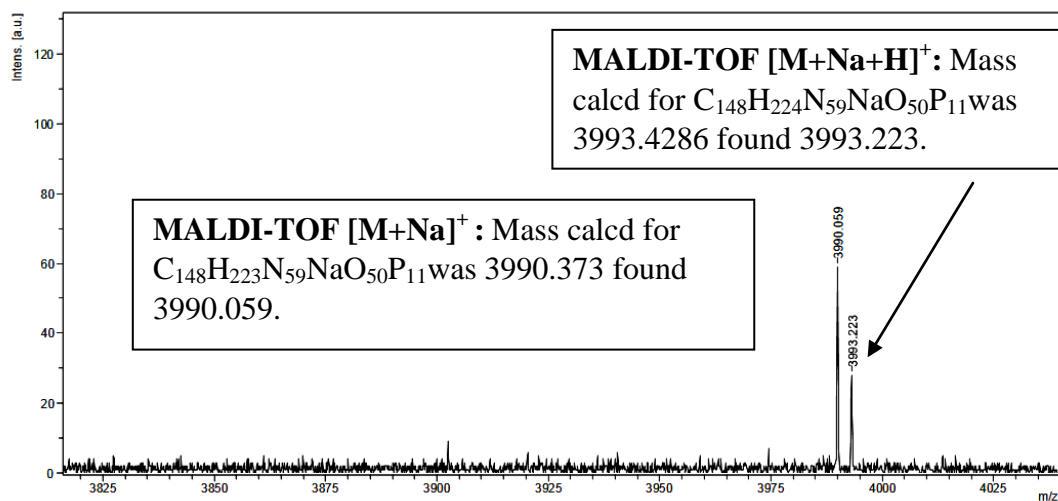

**Figure S22:** (A) HPLC Chromatogram of PMO 17 [5'-TTTTACUCACAT-3' (U-Naphthyl, 7g)], (B) MALDI-TOF spectrum of PMO 17

**Chromatogram**

(A)

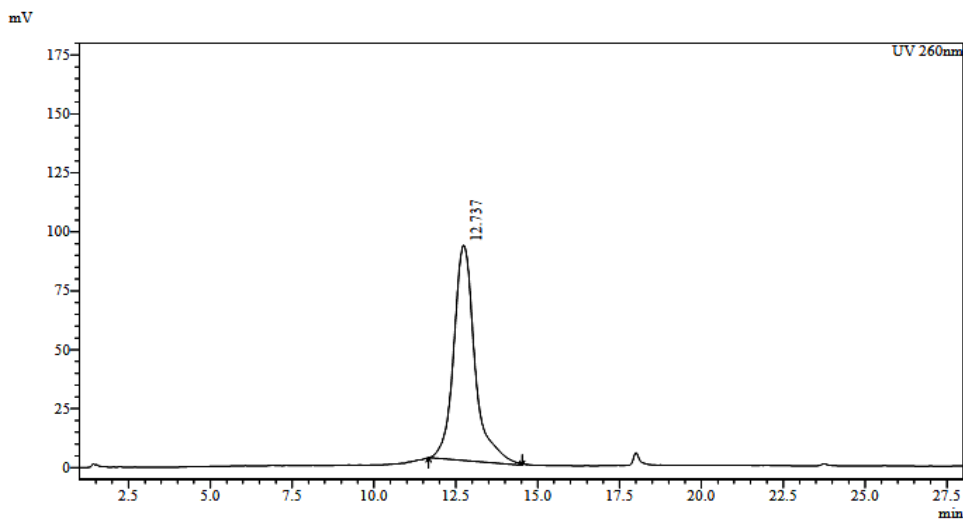

**Peak Table**

UV 260nm

| Peak# | Ret. Time | Area    | Height | Area%   |
|-------|-----------|---------|--------|---------|
| 1     | 12.737    | 4113798 | 91256  | 100.000 |
| Total |           | 4113798 | 91256  | 100.000 |

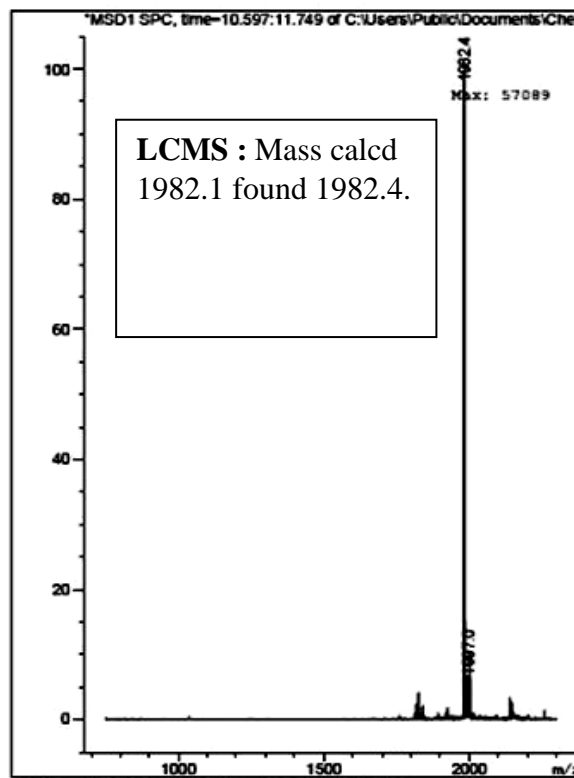

**Figure S23:** (A) HPLC Chromatogram of PMO 18 [5'-TTTTACUCACAT-3' (U-iodo, 7i)], (B) LCMS-spectrum of PMO 18



### Chromatogram

(A)

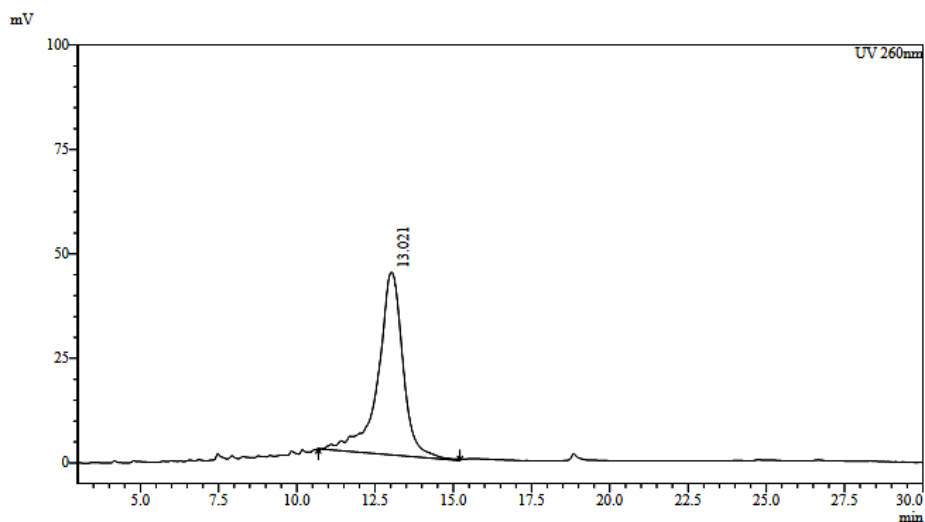

### Peak Table

| Peak# | Ret. Time | Area    | Height | Area%   |
|-------|-----------|---------|--------|---------|
| 1     | 13.021    | 2432376 | 43722  | 100.000 |
| Total |           | 2432376 | 43722  | 100.000 |

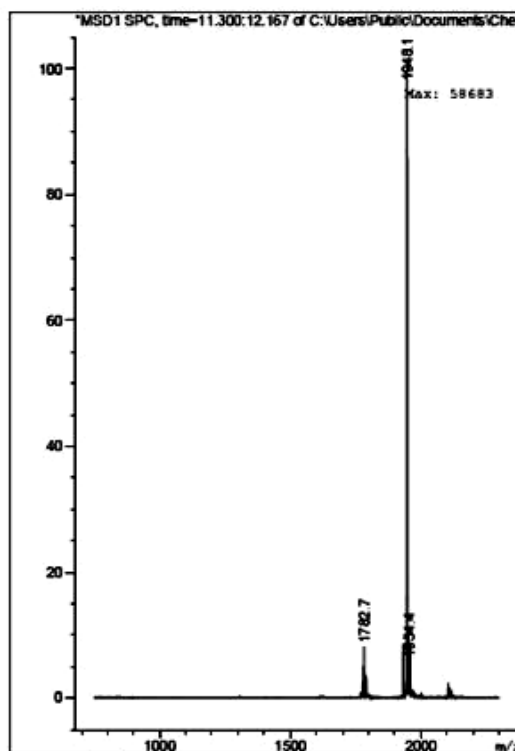

LCMS : Mass calcd  
was 1947.1 found  
1948.1

**Figure S24:** (A) HPLC Chromatogram of PMO 19 [5'-TTTTACUCACAT-3' (m5C, 6k)], (B) LCMS spectrum of PMO 19

### Chromatogram

(A)

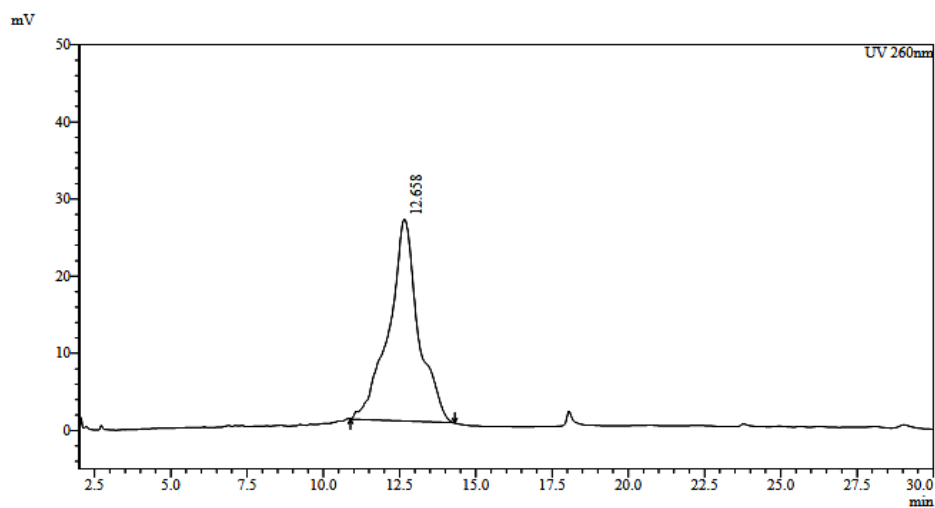

### Peak Table

| UV 260nm | Peak# | Ret. Time | Area    | Height | Area%   |
|----------|-------|-----------|---------|--------|---------|
|          | 1     | 12.658    | 1764394 | 26170  | 100.000 |
|          | Total |           | 1764394 | 26170  | 100.000 |

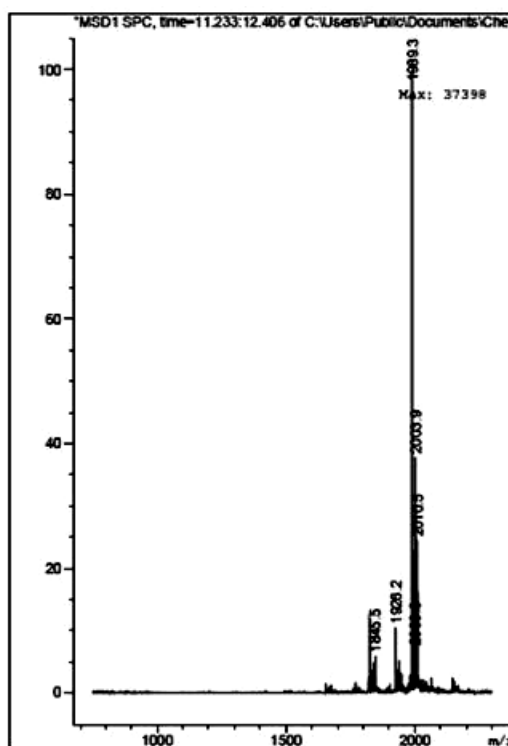

LCMS : Mass calcd  
was 1989.1 found  
1989.3

**Figure S25:** (A) HPLC Chromatogram of PMO 20 [5'-TTTTACUCACAT-3' (C-iodo, 6k)], (B) LCMS spectrum of PMO 20

**Chromatogram**

(A)

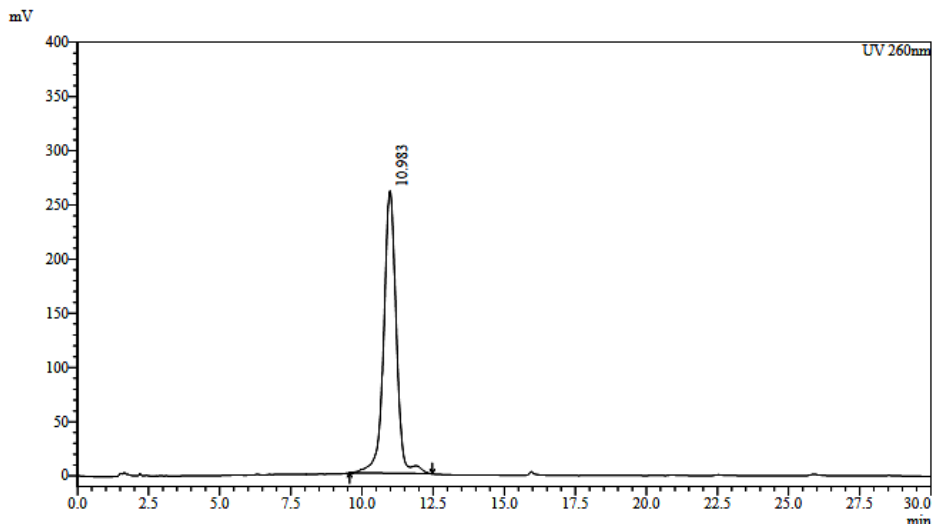

**Peak Table**

| UV 260nm |           |         |        |         |
|----------|-----------|---------|--------|---------|
| Peak#    | Ret. Time | Area    | Height | Area%   |
| 1        | 10.983    | 8019065 | 260530 | 100.000 |
| Total    |           | 8019065 | 260530 | 100.000 |

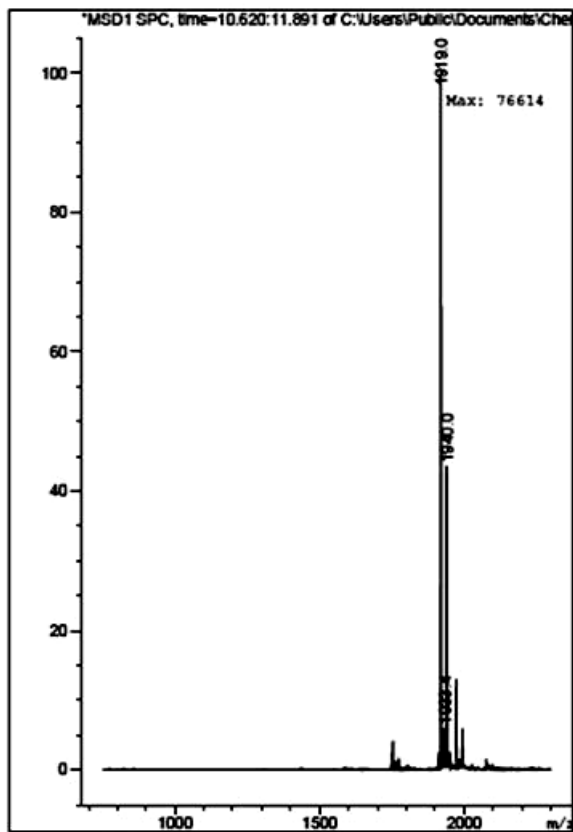

**LCMS:** Mass calcd was 1918.7 found 1919.0

**Figure S26:** (A) HPLC Chromatogram of PMO 21 [5'-TTTTACCCACAT-3' (Single mismatch regular PMO)], (B) LCMS spectrum of PMO 21

(A)

### Chromatogram

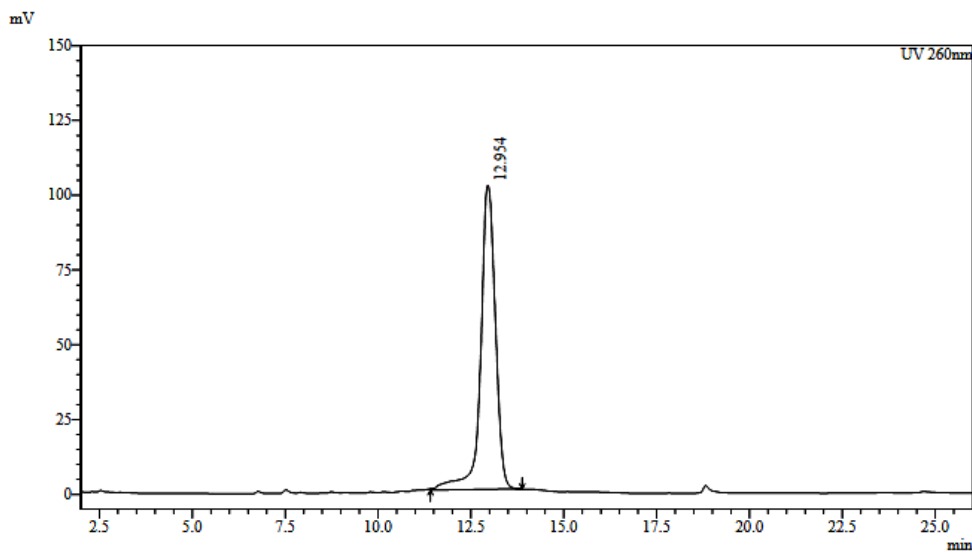

### Peak Table

| UV 260nm |           |         |        |         |
|----------|-----------|---------|--------|---------|
| Peak#    | Ret. Time | Area    | Height | Area%   |
| 1        | 12.954    | 2814128 | 101620 | 100.000 |
| Total    |           | 2814128 | 101620 | 100.000 |

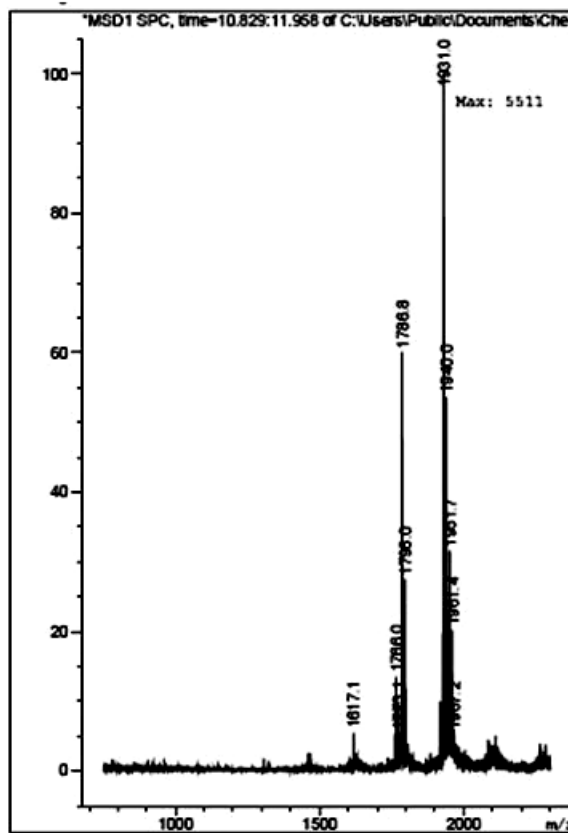

LCMS: Mass calcd  
was 1930.7 found  
1931.0

Figure S27: (A) HPLC Chromatogram of PMO 22 [5'-TTTTACCCCACAT-3' (Single mismatch C-acetylene, 6a)], (B) LCMS spectrum of PMO 22

(A) **Chromatogram**

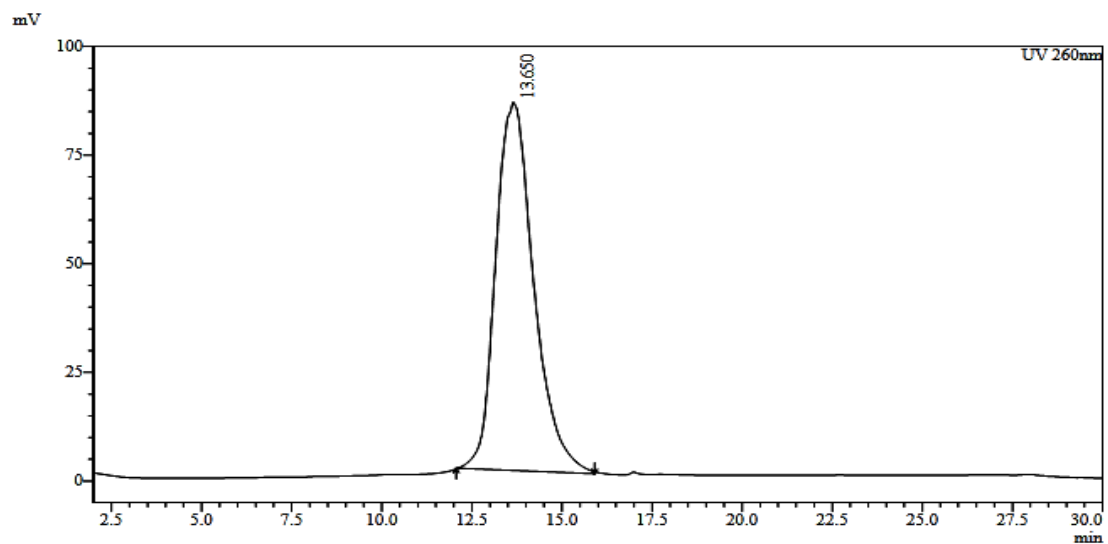

**Peak Table**

| UV 260nm |           |         |        |         |
|----------|-----------|---------|--------|---------|
| Peak#    | Ret. Time | Area    | Height | Area%   |
| 1        | 13.650    | 6242974 | 84763  | 100.000 |
| Total    |           | 6242974 | 84763  | 100.000 |

(B)

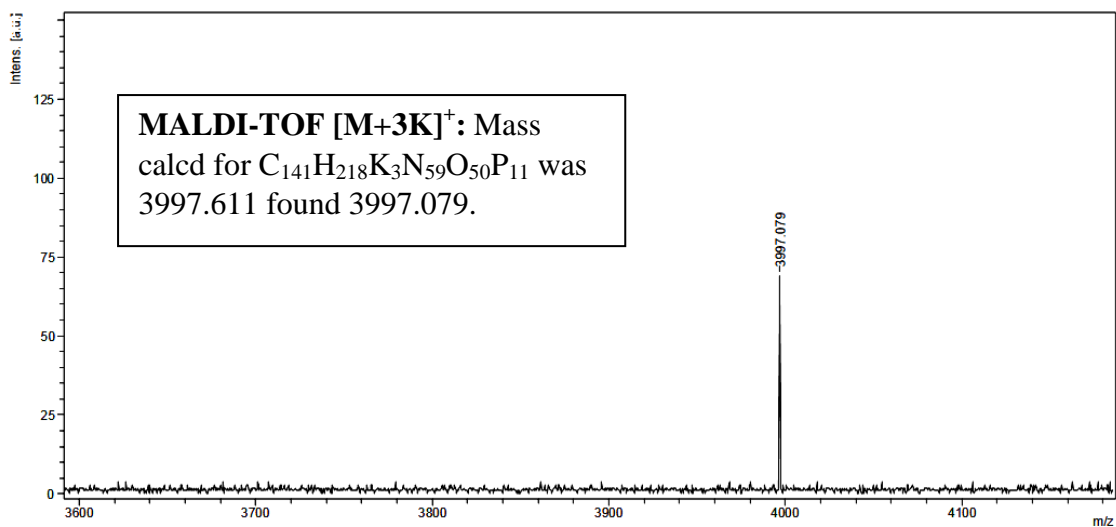

**Figure S28:** (A) HPLC Chromatogram of PMO 23 [5'-TTTTACCTACAT-3' (C-Acetylene, 6a)], (B) MALDI-TOF spectrum of PMO 23

(A) **Chromatogram**

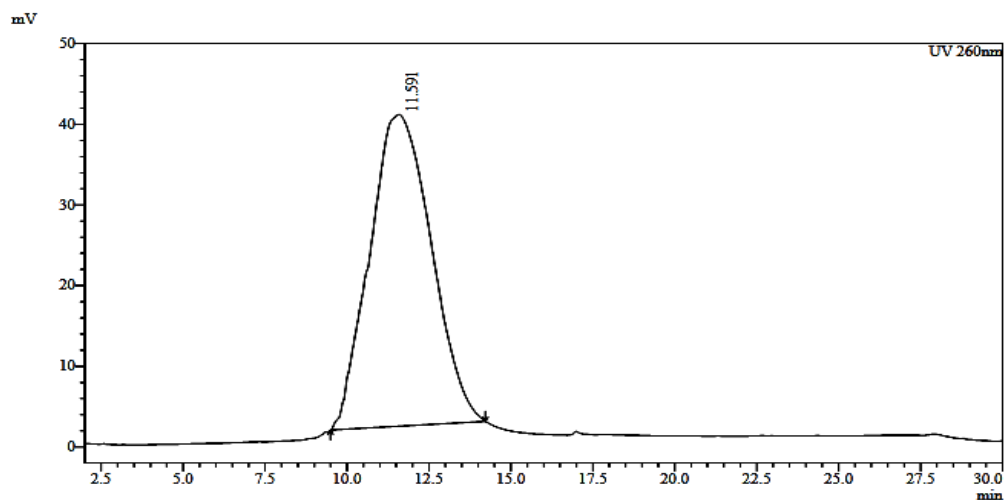

**Peak Table**

| UV 260nm |           |         |        |         |
|----------|-----------|---------|--------|---------|
| Peak#    | Ret. Time | Area    | Height | Area%   |
| 1        | 11.591    | 5062785 | 38591  | 100.000 |
| Total    |           | 5062785 | 38591  | 100.000 |

(B)

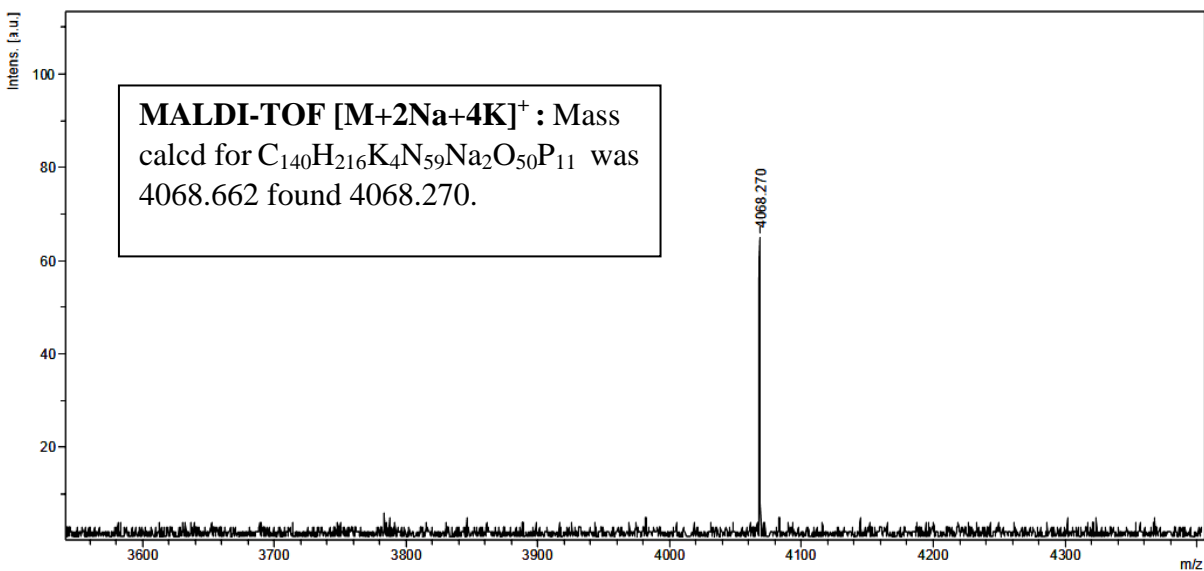

**Figure S29:** (A) HPLC Chromatogram of PMO 24 [5'-TTTTACCUACAT-3' (U-Acetylene, 7b)], (B) MALDI-TOF spectrum of PMO 24.

## 8. Melting temperature Curves

(A)

5'-T-T-T-T-A-C-T-C-A-C-A-T-3'

3'-A<sub>d</sub>A<sub>d</sub>A<sub>d</sub>A<sub>d</sub>T<sub>d</sub>G<sub>d</sub>A<sub>d</sub>G<sub>d</sub>T<sub>d</sub>G<sub>d</sub>T<sub>d</sub>A<sub>d</sub>-5'

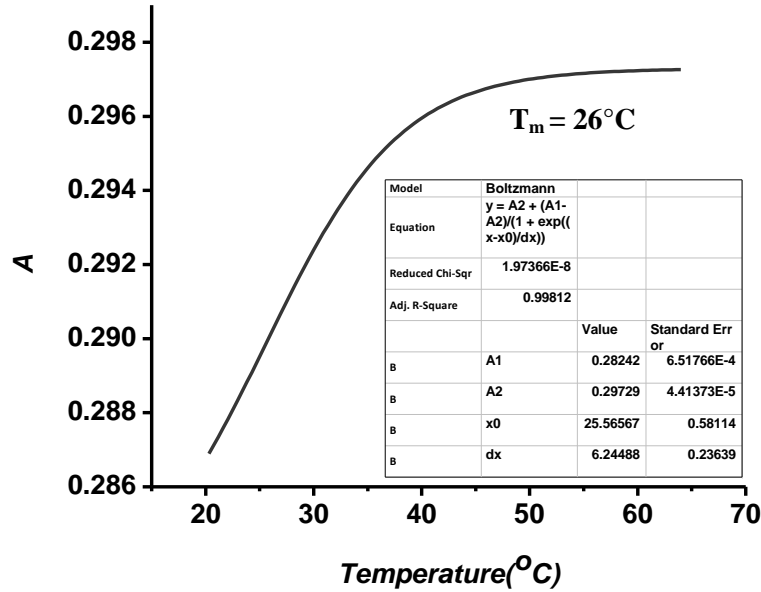

(B)

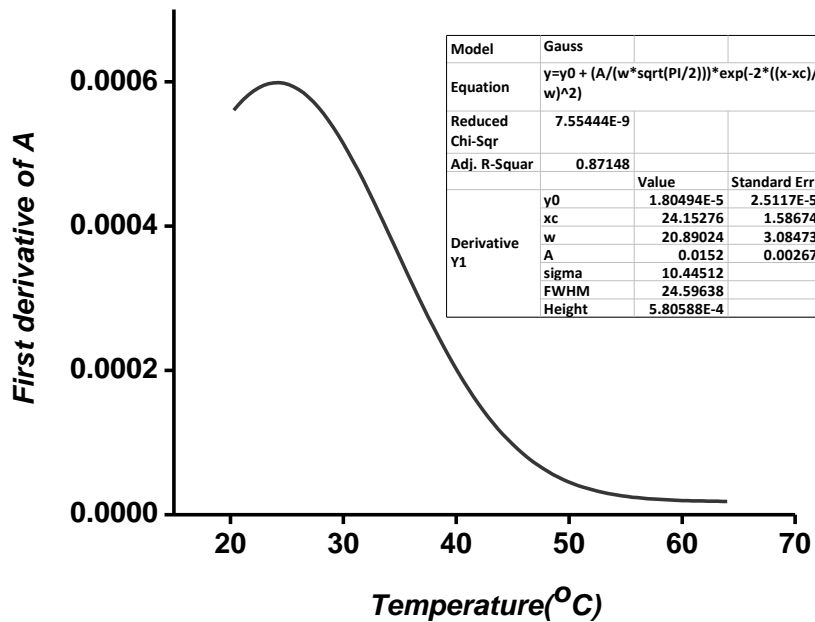

**Figure S30:** Thermal melting curve of duplexes in 40mM phosphate buffer (pH = 7) (A) PMO1-DNA (B) First derivative plot PMO1-DNA

(A)

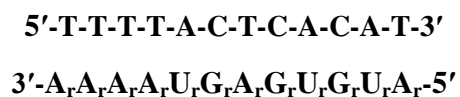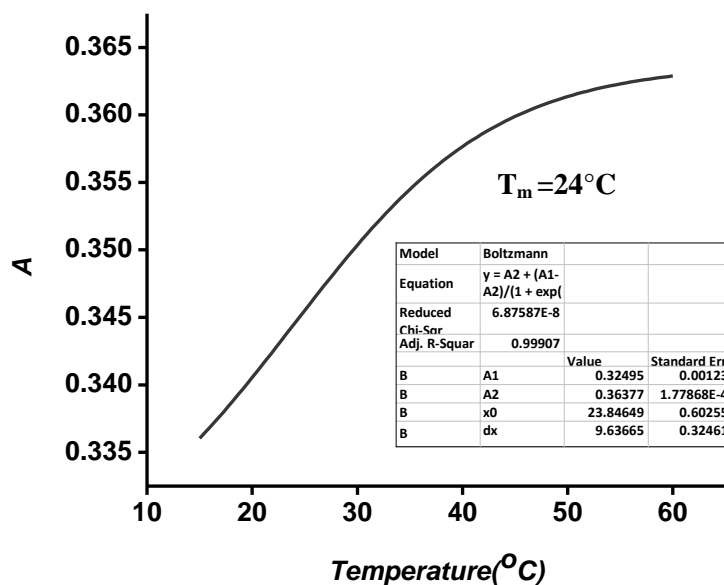

(B)

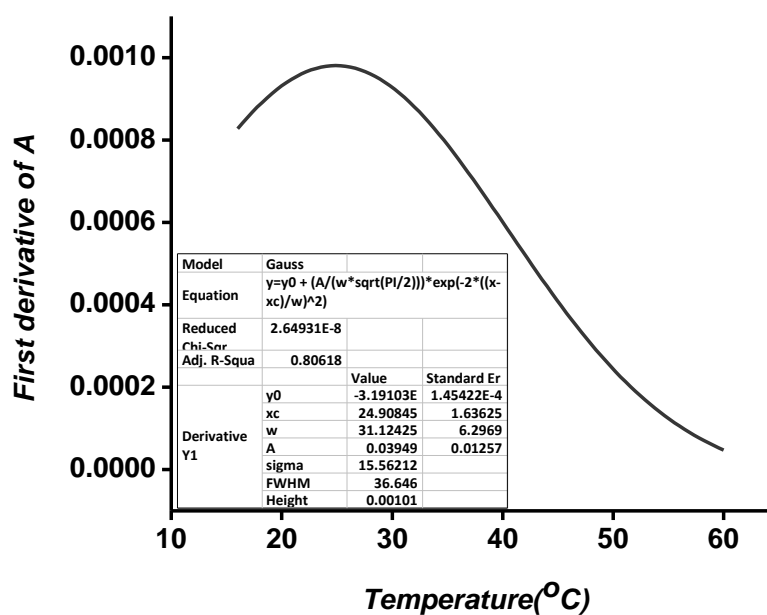

**Figure S31:** Thermal melting curve of duplexes in 40 mM phosphate buffer (pH = 7) (A) PMO1-RNA (B) First derivative plot PMO1-RNA



(A)

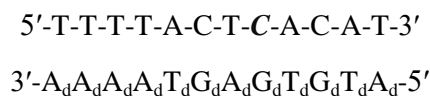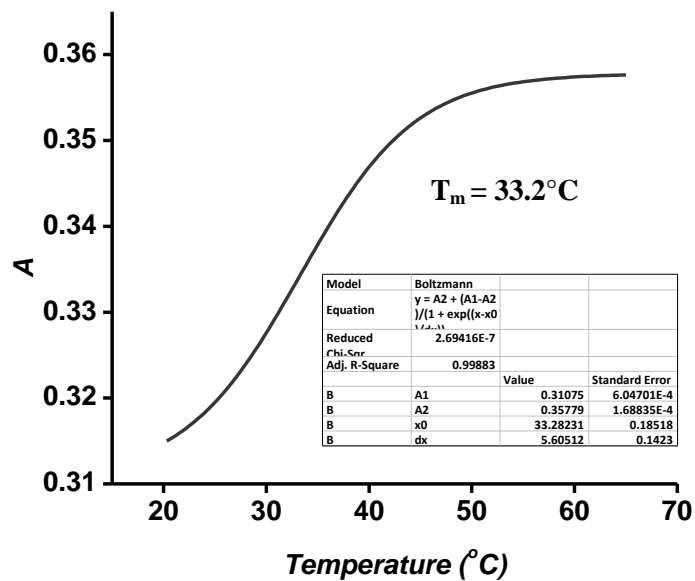

(B)

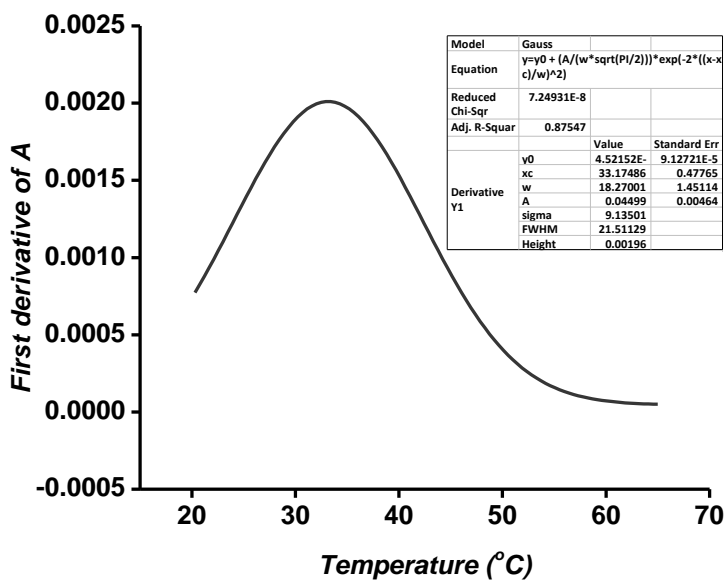

**Figure S32:** Thermal melting curve of duplexes in 40 mM phosphate buffer (pH = 7) (A) PMO2-DNA (B) First derivative plot PMO2-DNA

(A)

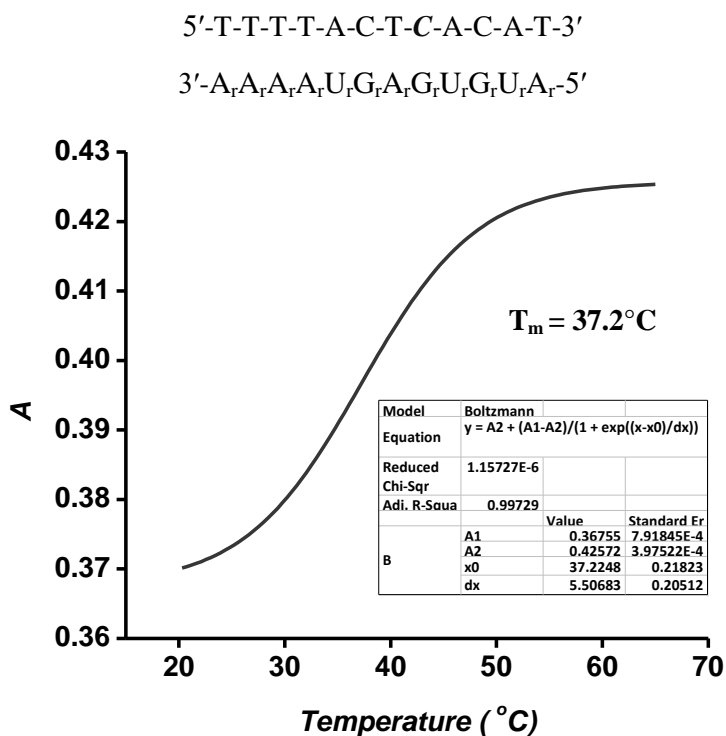

(B)

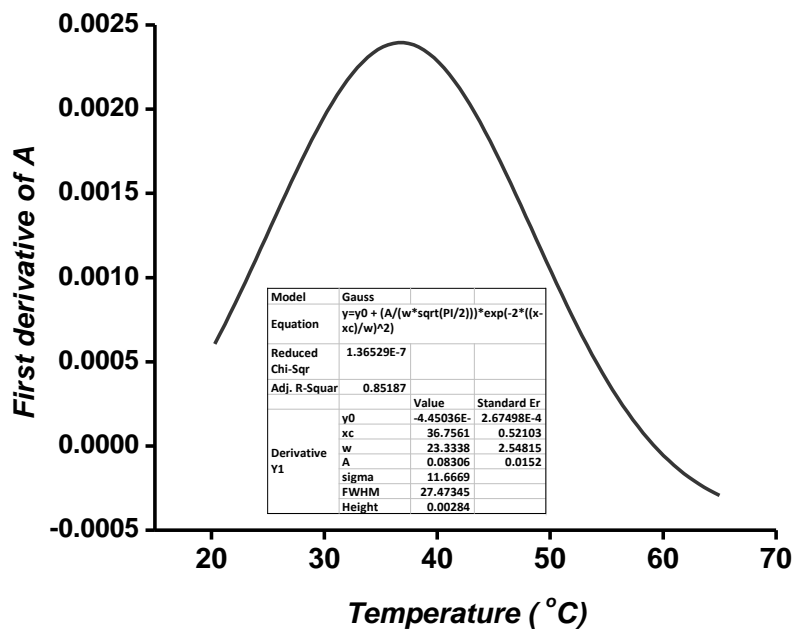

**Figure S33:** Thermal melting curve of duplexes in 40 mM phosphate buffer (pH = 7) (A) PMO2-RNA (B) First derivative plot PMO2-RNA

(A)

5'-T-T-T-T-A-C-U-C-A-C-A-T-3'

3'-A<sub>d</sub>A<sub>d</sub>A<sub>d</sub>A<sub>d</sub>T<sub>d</sub>G<sub>d</sub>A<sub>d</sub>G<sub>d</sub>T<sub>d</sub>G<sub>d</sub>T<sub>d</sub>A<sub>d</sub>-5'

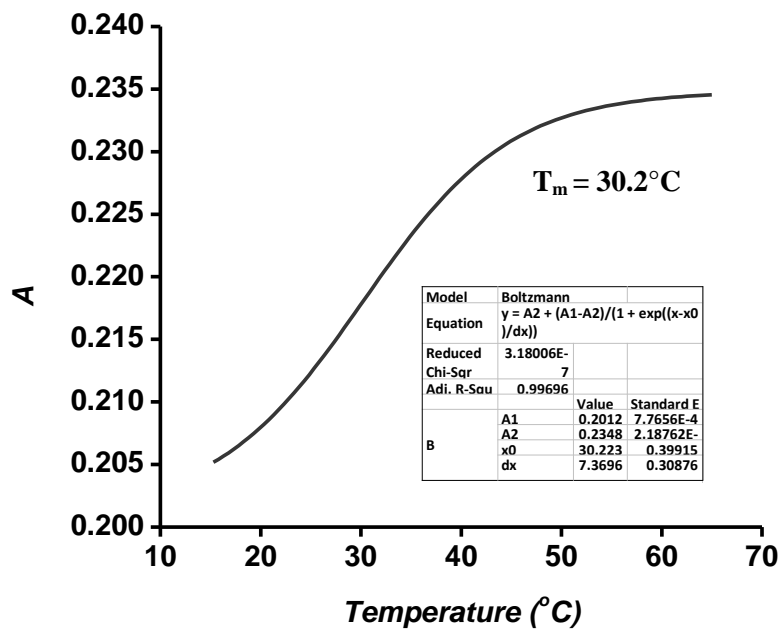

(B)

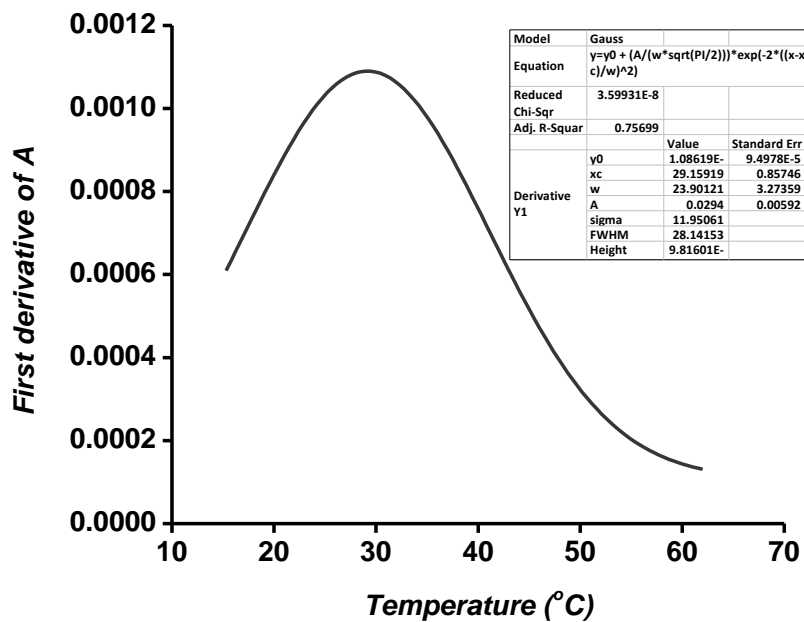

**Figure S34:** Thermal melting curve of duplexes in 40 mM phosphate buffer (pH = 7) (A) PMO3-DNA (B) First derivative plot PMO3-DNA

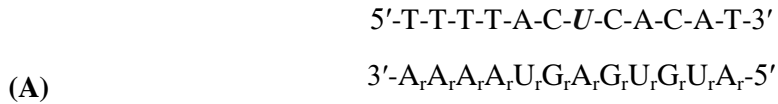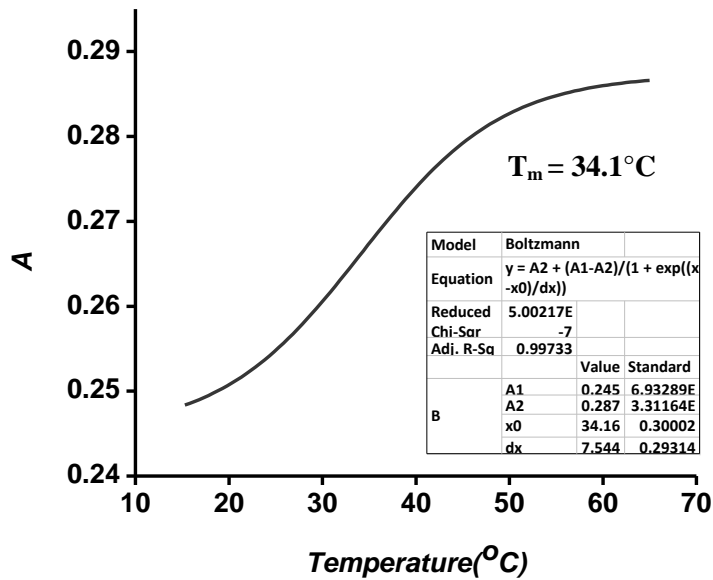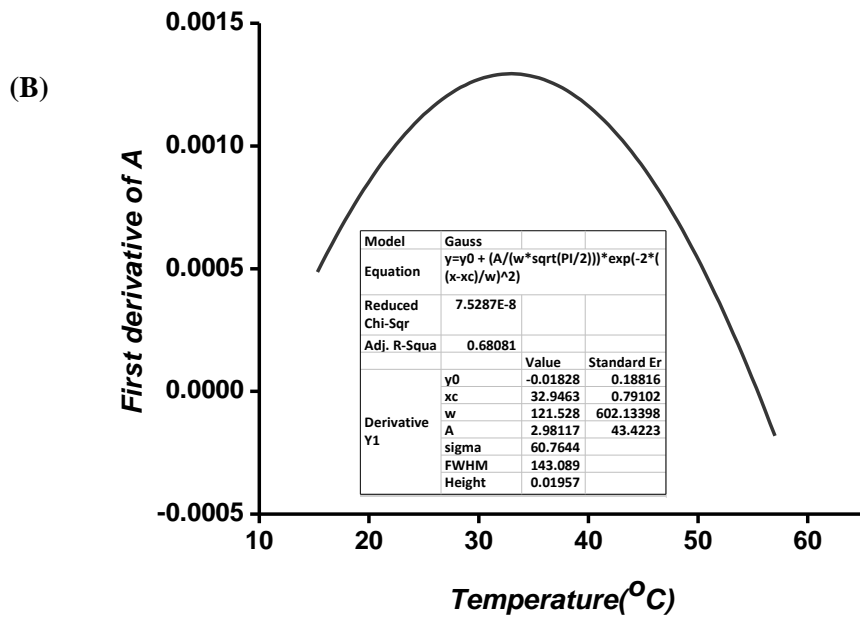

**Figure S35:** Thermal melting curve of duplexes in 40mM phosphate buffer (pH = 7) (A) PMO3-RNA (B) First derivative plot PMO3-RNA

(A)

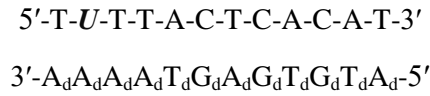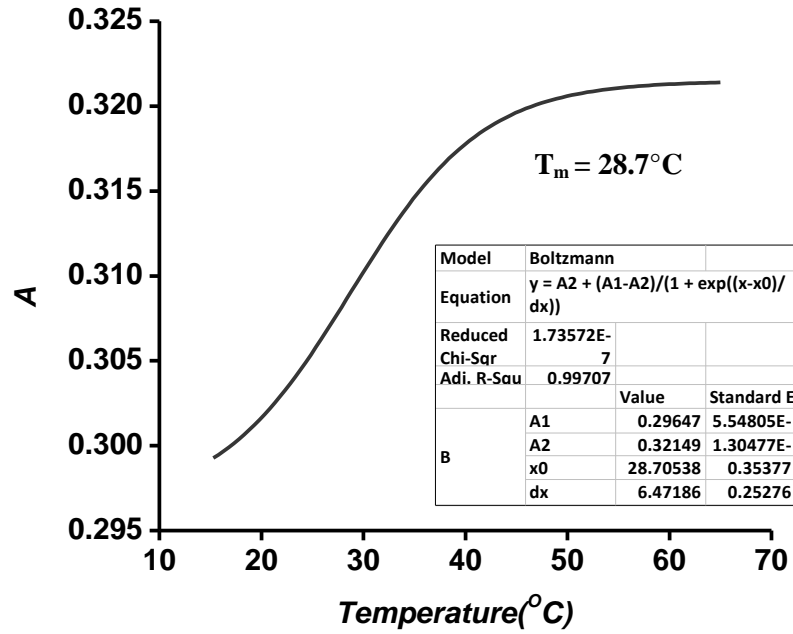

(B)

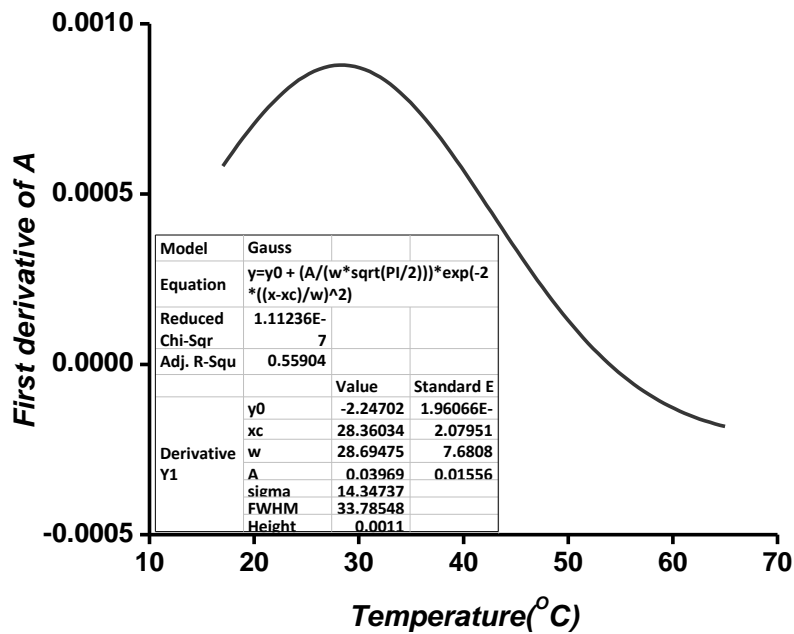

**Figure S36:** Thermal melting curve of duplexes in 40mM phosphate buffer (pH = 7) (A) PMO4-DNA (B) First derivative plot PMO4-DNA

(A)

5'-T-U-T-T-A-C-T-C-A-C-A-T-3'

3'-A<sub>r</sub>A<sub>r</sub>A<sub>r</sub>A<sub>r</sub>U<sub>r</sub>G<sub>r</sub>A<sub>r</sub>G<sub>r</sub>U<sub>r</sub>G<sub>r</sub>U<sub>r</sub>A<sub>r</sub>-5'

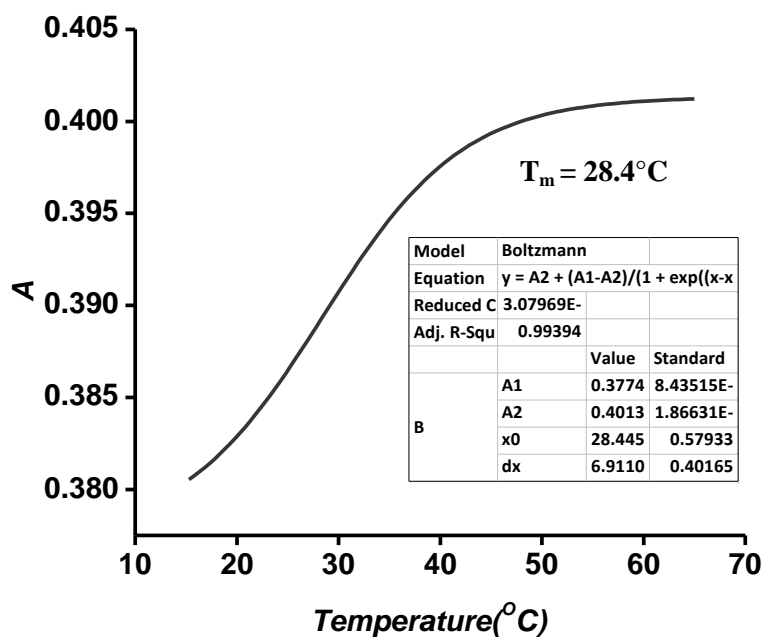

(B)

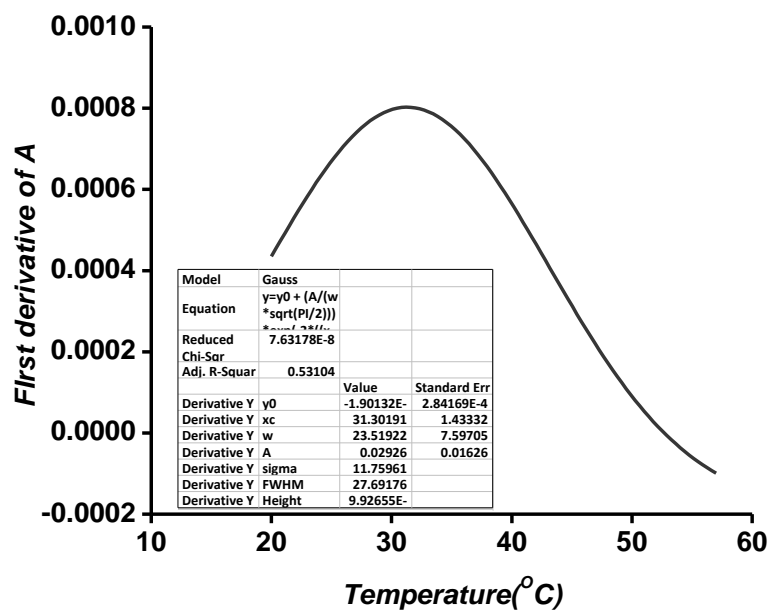

**Figure S37:** Thermal melting curve of duplexes in 40 mM phosphate buffer (pH = 7) (A) PMO4-RNA (B) First derivative plot PMO4-RNA

(A)

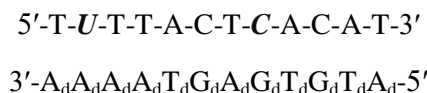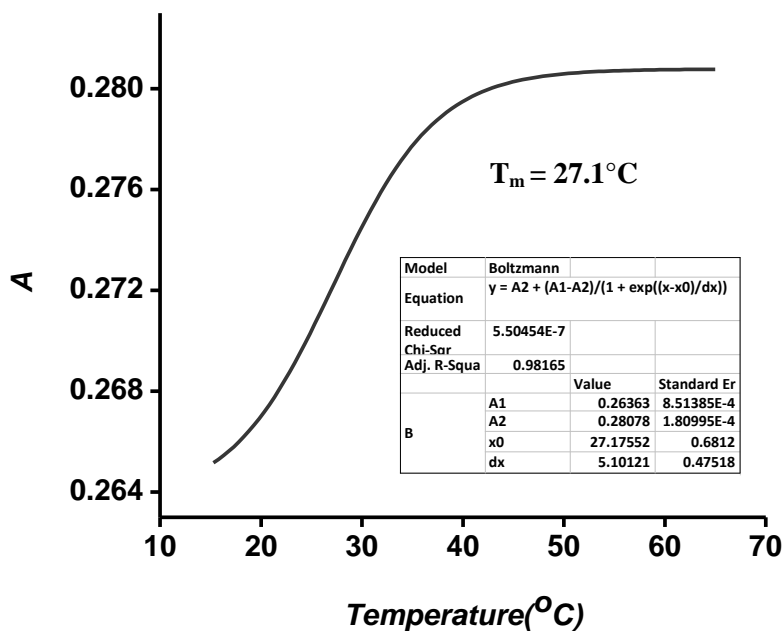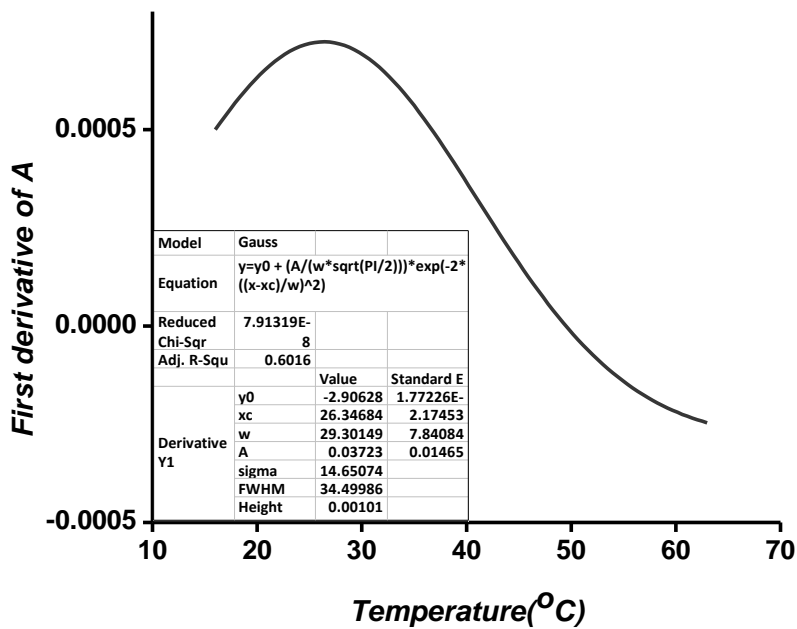

**Figure S38:** Thermal melting curve of duplexes in 40mM phosphate buffer (pH = 7) (A) PMO5-DNA (B) First derivative plot PMO5-DNA

(B)

5'-T-U-T-T-A-C-T-C-A-C-A-T-3'

3'-A<sub>r</sub>A<sub>r</sub>A<sub>r</sub>A<sub>r</sub>U<sub>r</sub>G<sub>r</sub>A<sub>r</sub>G<sub>r</sub>U<sub>r</sub>G<sub>r</sub>U<sub>r</sub>A<sub>r</sub>-5'

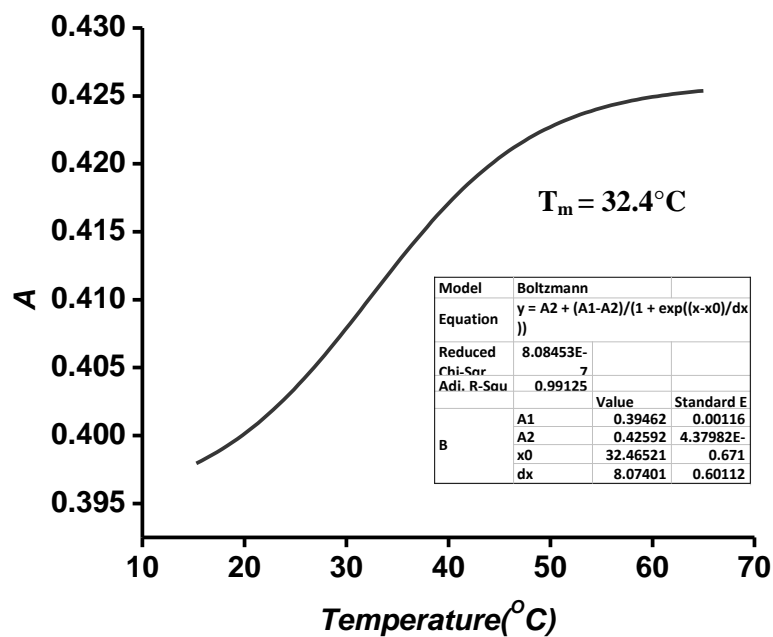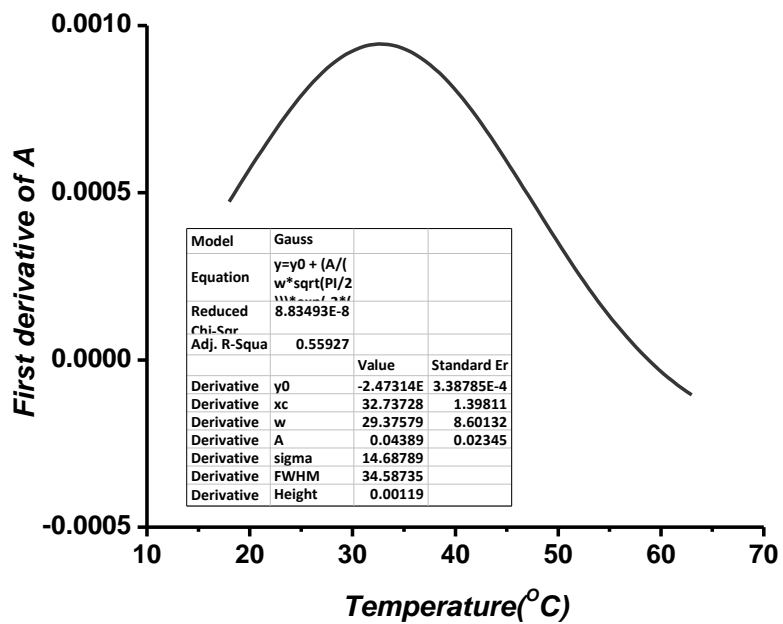

**Figure S39:** Thermal melting curve of duplexes in 40mM phosphate buffer (pH = 7) (A) PMO5-RNA (B) First derivative plot PMO5-RNA



(A)

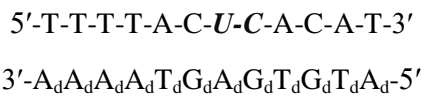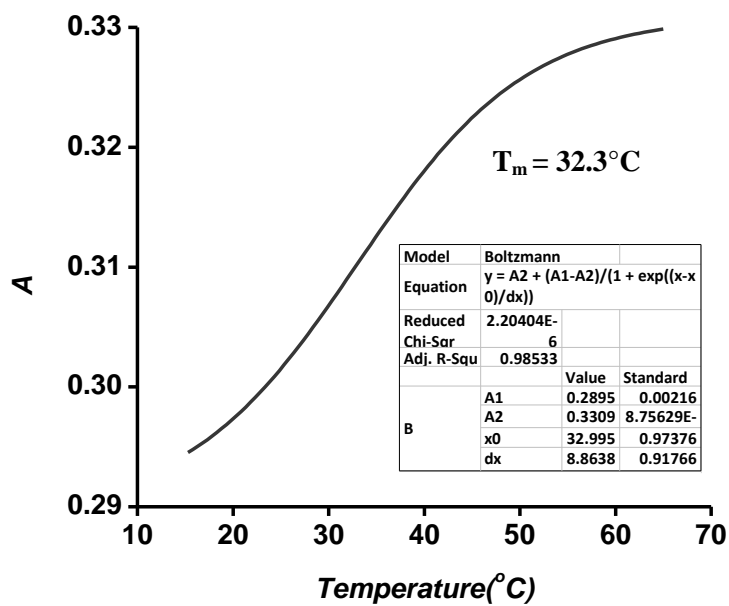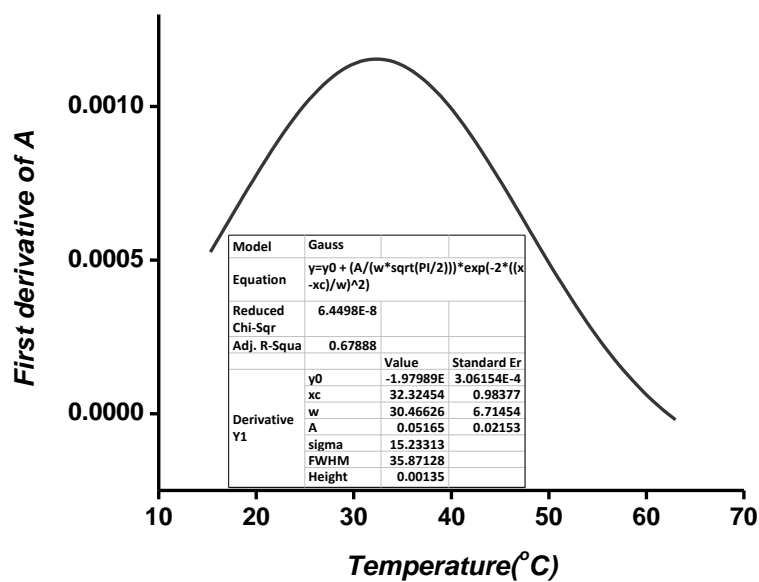

**Figure S40:** Thermal melting curve of duplexes in 40mM phosphate buffer (pH = 7) (A) PMO6-DNA (B) First derivative plot PMO6-DNA

(B)

5'-T-T-T-T-A-C-U-C-A-C-A-T-3'

3'-A<sub>r</sub>A<sub>r</sub>A<sub>r</sub>A<sub>r</sub>U<sub>r</sub>G<sub>r</sub>A<sub>r</sub>G<sub>r</sub>U<sub>r</sub>G<sub>r</sub>U<sub>r</sub>A<sub>r</sub>-5'

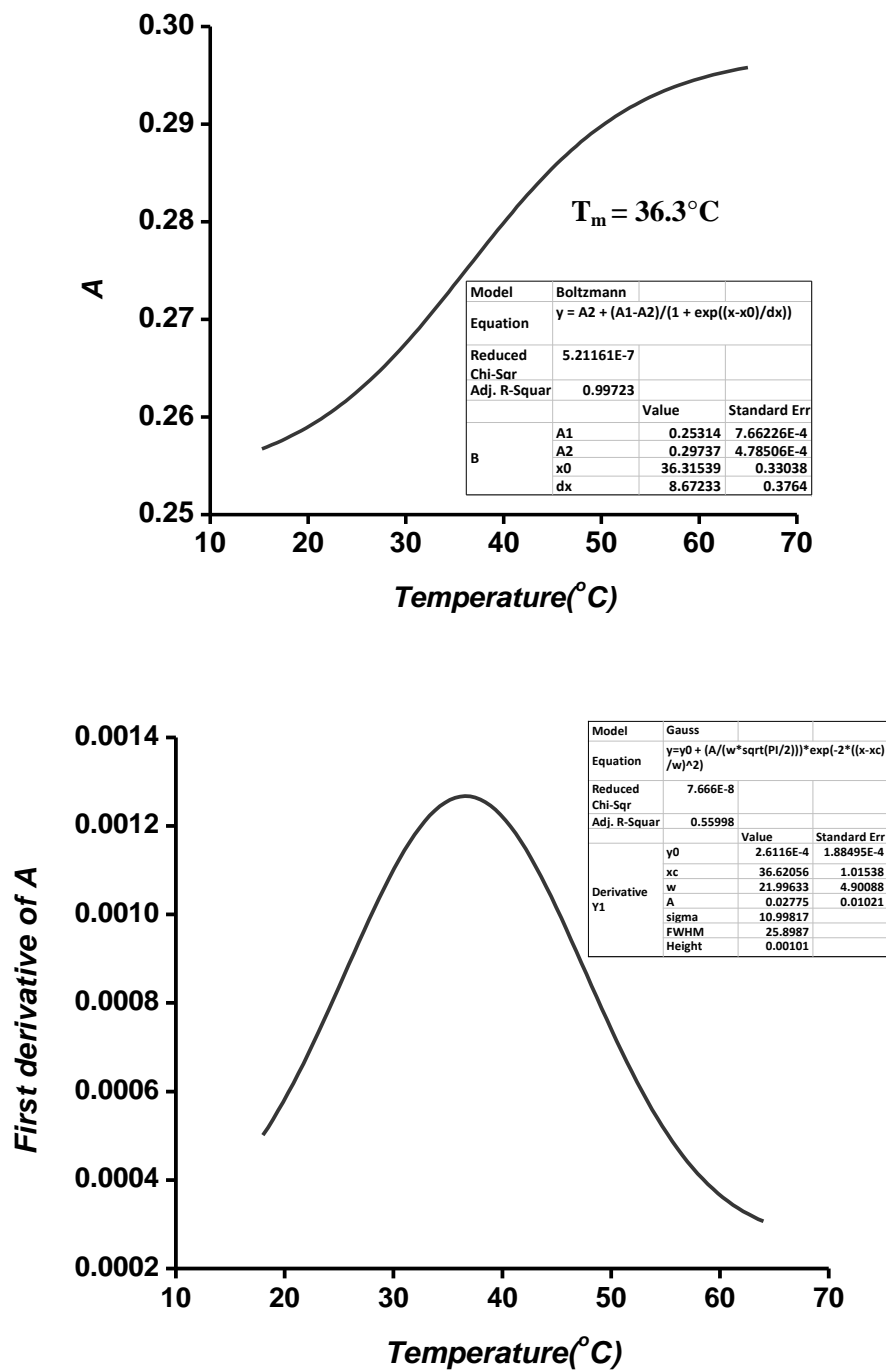

**Figure S41:** Thermal melting curve of duplexes in 40mM phosphate buffer (pH = 7) (A) PMO6-RNA (B) First derivative plot PMO6-RNA

(A)

5'-T-T-T-T-A-C-T-C-A-C-A-T-3'

3'-A<sub>d</sub>A<sub>d</sub>A<sub>d</sub>A<sub>d</sub>T<sub>d</sub>G<sub>d</sub>A<sub>d</sub>G<sub>d</sub>T<sub>d</sub>G<sub>d</sub>T<sub>d</sub>A<sub>d</sub>-5'

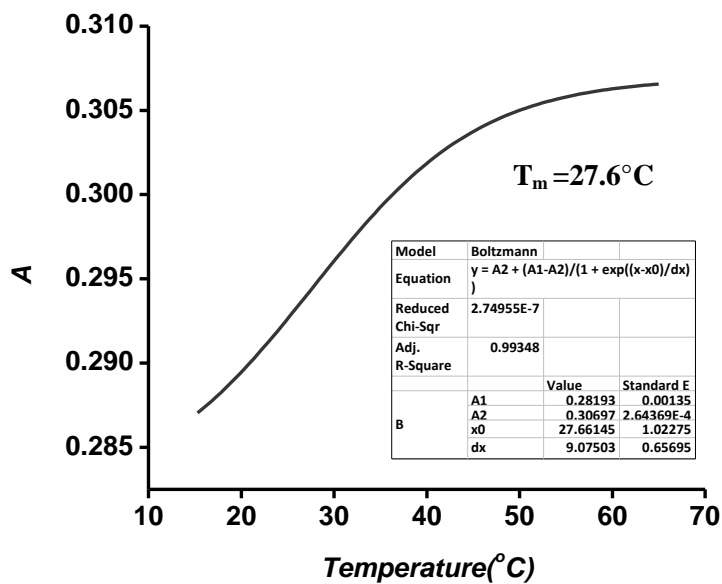

(B)

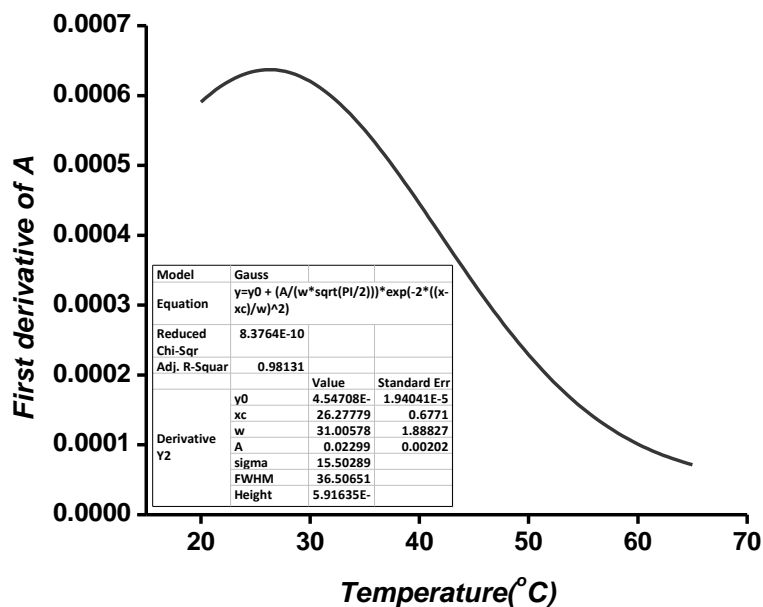

**Figure S42:** Thermal melting curve of duplexes in 40mM phosphate buffer (pH = 7) (A) PMO7-DNA (B) First derivative plot PMO7-DNA

(A)

5'-T-T-T-T-A-C-T-C-A-C-A-T-3'

3'-A<sub>r</sub>A<sub>r</sub>A<sub>r</sub>A<sub>r</sub>U<sub>r</sub>G<sub>r</sub>A<sub>r</sub>G<sub>r</sub>U<sub>r</sub>G<sub>r</sub>U<sub>r</sub>A<sub>r</sub>-5'

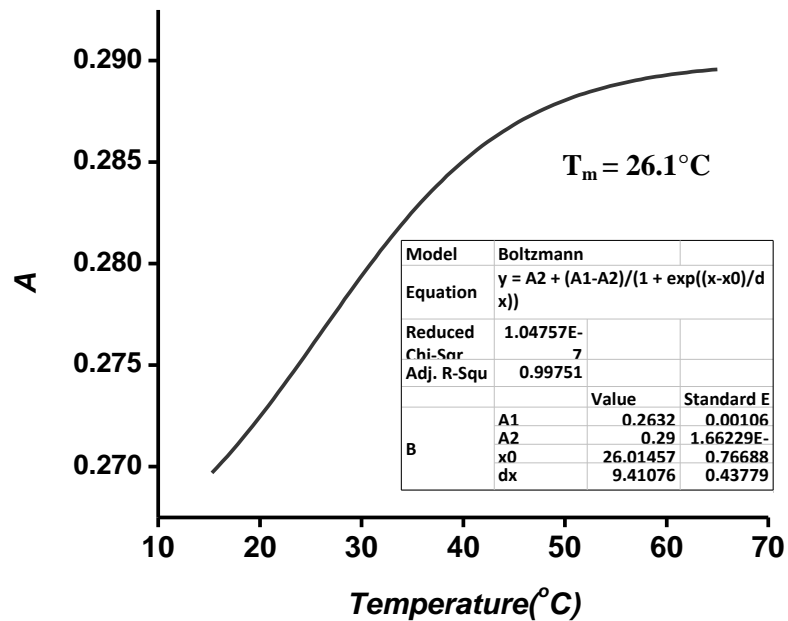

(B)

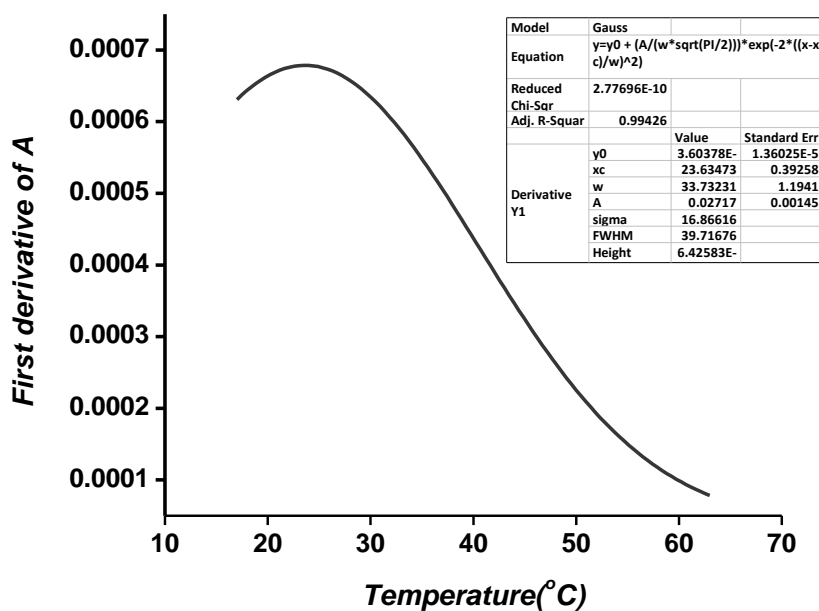

**Figure S43:** Thermal melting curve of duplexes in 40mM phosphate buffer (pH = 7) (A) PMO7-RNA (B) First derivative plot PMO7-RNA

(A)

5'-T-T-T-T-A-C-T-C-A-C-A-T-3'

3'-A<sub>d</sub>A<sub>d</sub>A<sub>d</sub>A<sub>d</sub>T<sub>d</sub>G<sub>d</sub>A<sub>d</sub>G<sub>d</sub>T<sub>d</sub>G<sub>d</sub>T<sub>d</sub>A<sub>d</sub>-5'

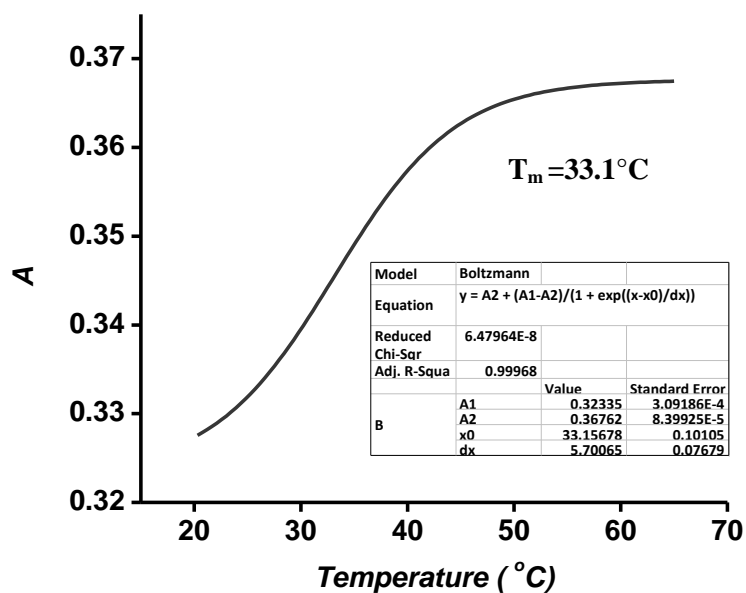

(B)

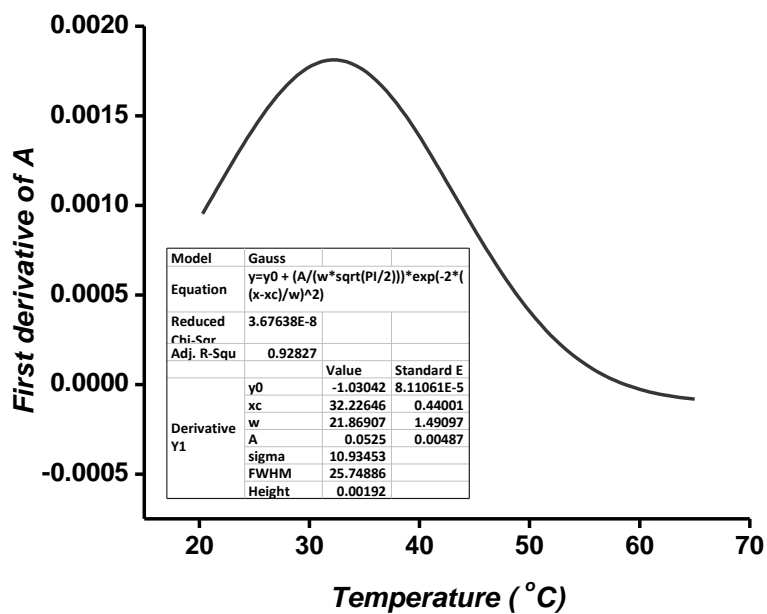

**Figure S44:** Thermal melting curve of duplexes in 40mM phosphate buffer (pH = 7) (A) PMO8-DNA (B) First derivative plot PMO8-DNA

(A)

5'-T-T-T-T-A-C-T-C-A-C-A-T-3'

3'-A<sub>r</sub>A<sub>r</sub>A<sub>r</sub>A<sub>r</sub>U<sub>r</sub>G<sub>r</sub>A<sub>r</sub>G<sub>r</sub>U<sub>r</sub>G<sub>r</sub>U<sub>r</sub>A<sub>r</sub>-5'

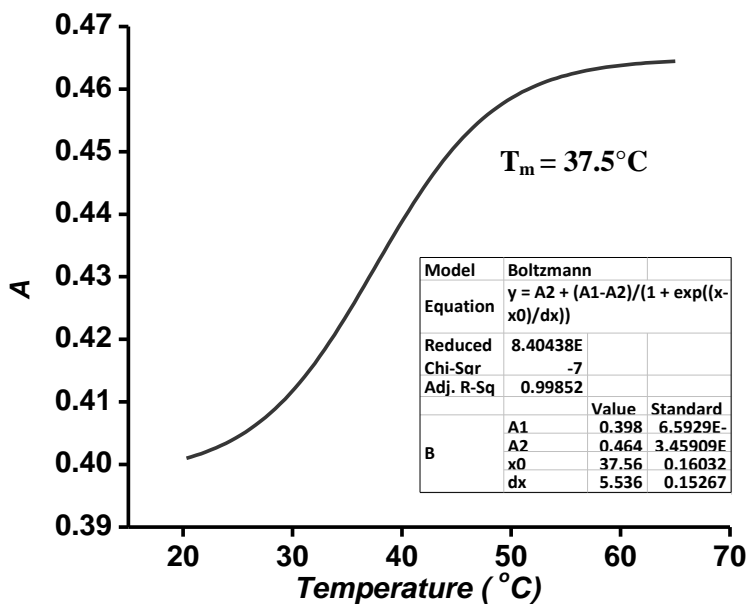

(B)

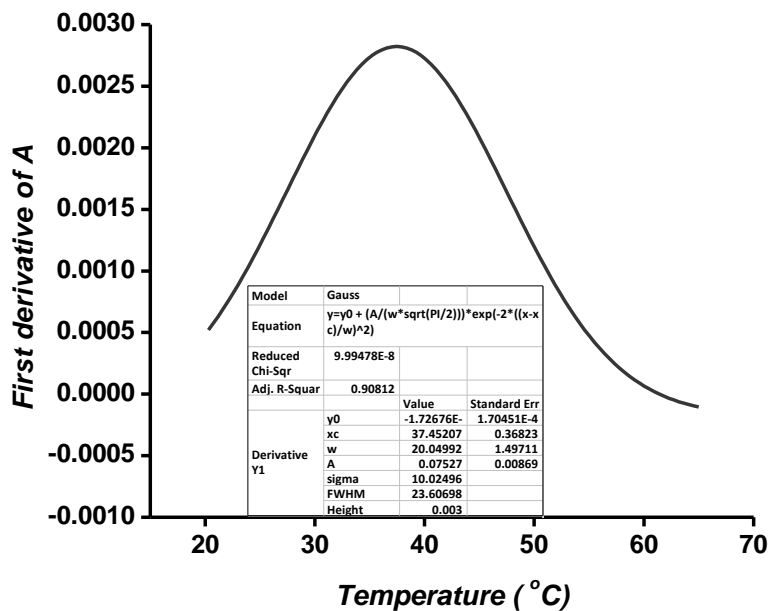

**Figure S45:** Thermal melting curve of duplexes in 40mM phosphate buffer (pH = 7) (A) PMO8-RNA (B) First derivative plot PMO8-RNA

(A)

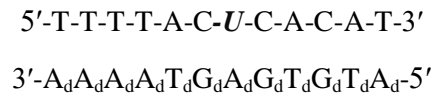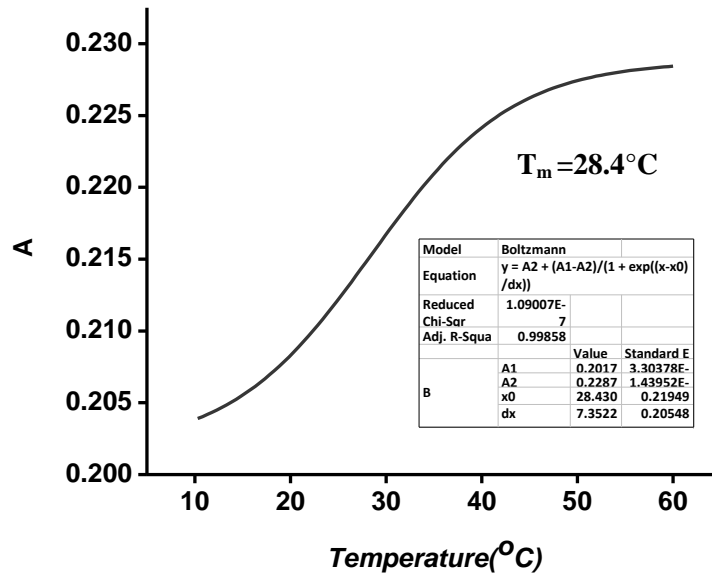

(B)

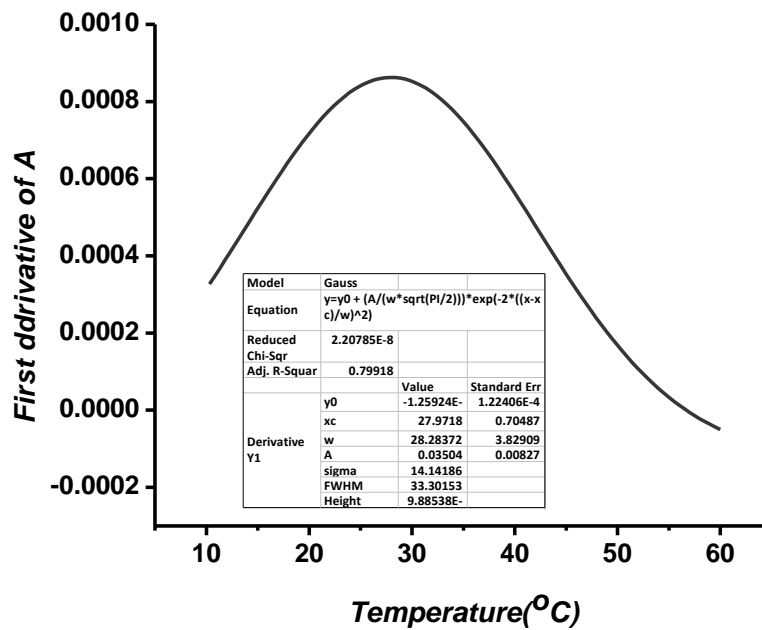

**Figure S46:** Thermal melting curve of duplexes in 40mM phosphate buffer (pH = 7) (A) PMO9-DNA (B) First derivative plot PMO9-DNA

(A)

5'-T-T-T-T-A-C-U-C-A-C-A-T-3'

3'-A<sub>r</sub>A<sub>r</sub>A<sub>r</sub>A<sub>r</sub>U<sub>r</sub>G<sub>r</sub>A<sub>r</sub>G<sub>r</sub>U<sub>r</sub>G<sub>r</sub>U<sub>r</sub>A<sub>r</sub>-5'

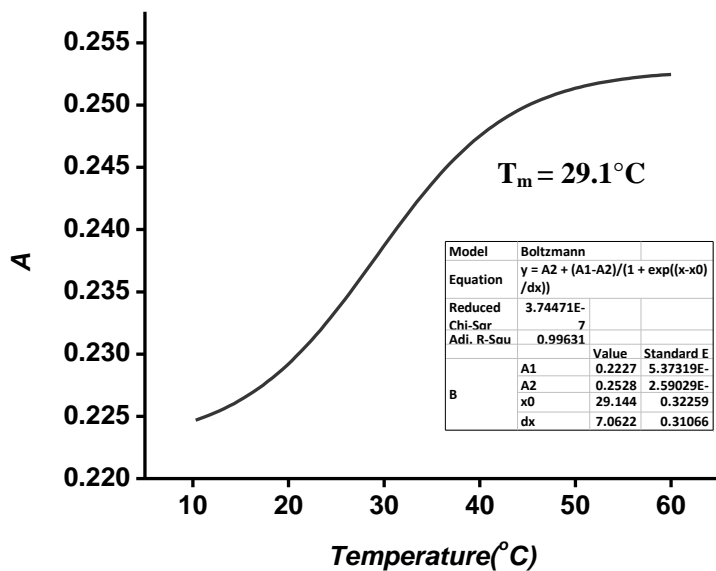

(B)

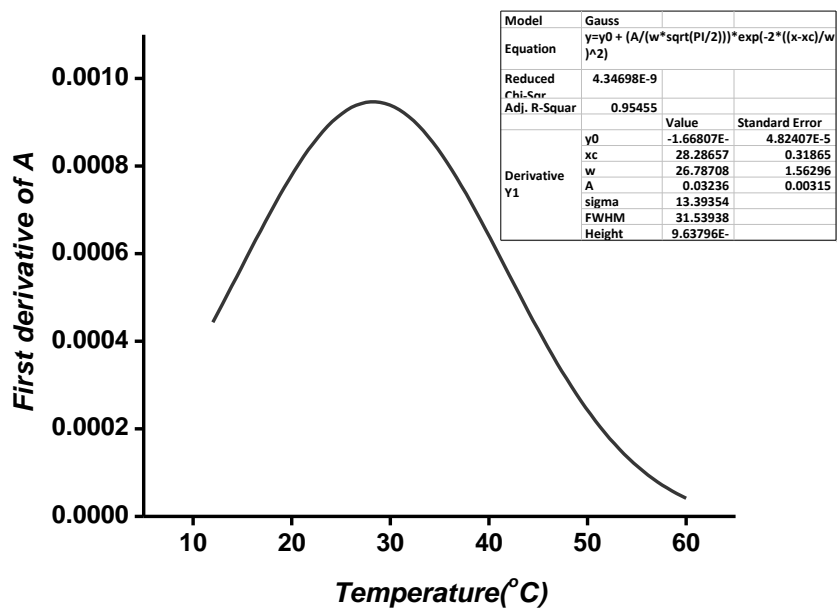

**Figure S47:** Thermal melting curve of duplexes in 40mM phosphate buffer (pH = 7) (A) PMO9-RNA (B) First derivative plot PMO9-RNA



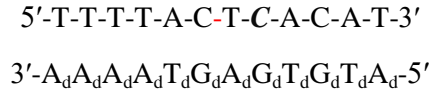

(A)

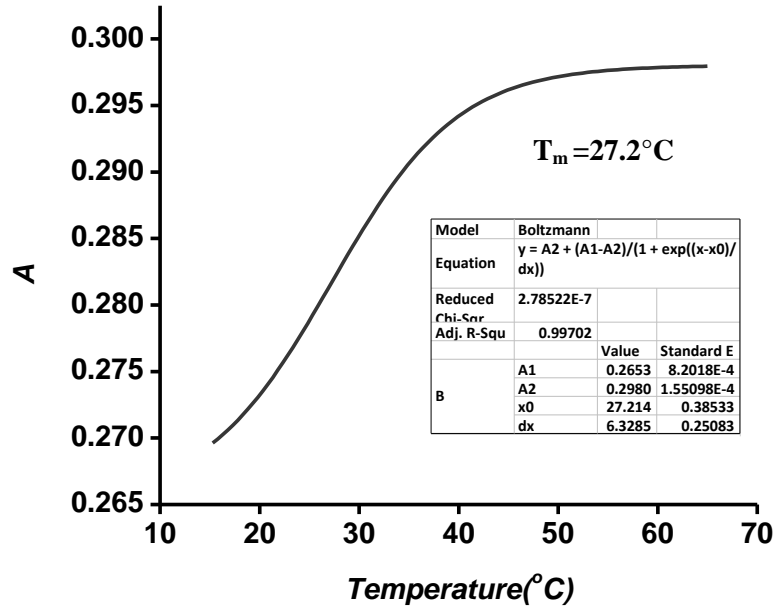

(B)

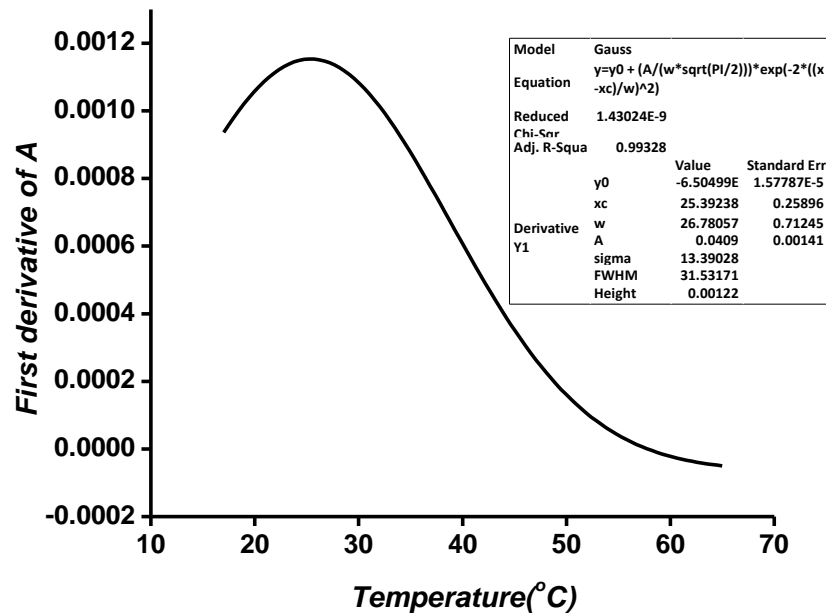

**Figure S48:** Thermal melting curve of duplexes in 40mM phosphate buffer (pH = 7) (A) PMO10-DNA (B) First derivative plot PMO10-DNA

(A)

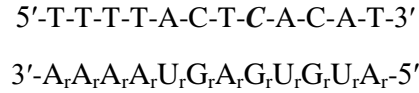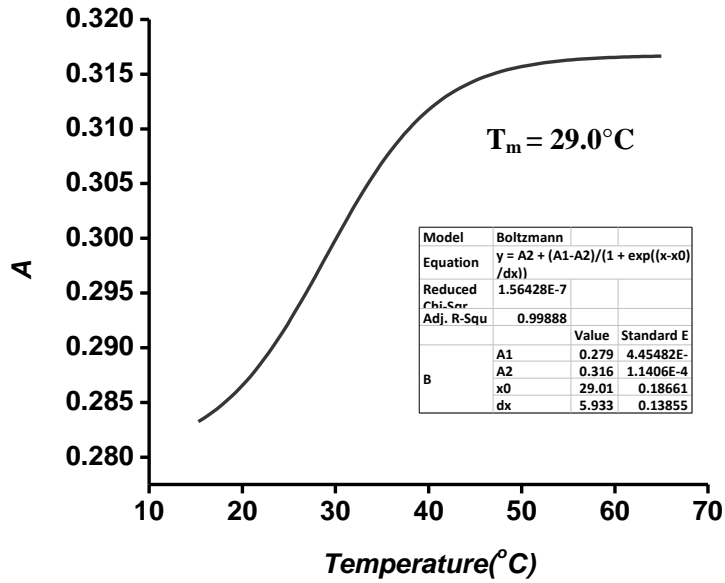

(B)

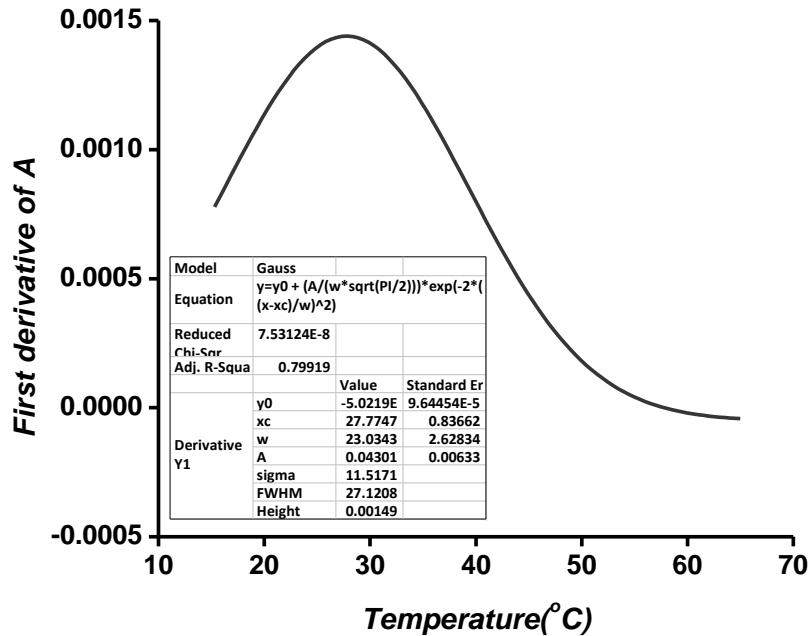

**Figure S49:** Thermal melting curve of duplexes in 40mM phosphate buffer (pH = 7) (A) PMO10-RNA (B) First derivative plot PMO10-RNA

(A)

5'-T-T-T-T-A-C-U-C-A-C-A-T-3'

3'-A<sub>d</sub>A<sub>d</sub>A<sub>d</sub>A<sub>d</sub>T<sub>d</sub>G<sub>d</sub>A<sub>d</sub>G<sub>d</sub>T<sub>d</sub>G<sub>d</sub>T<sub>d</sub>A<sub>d</sub>-5'

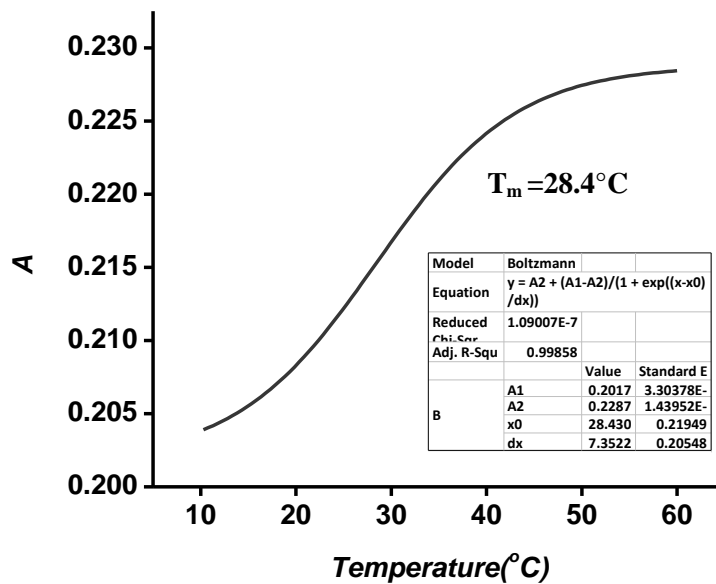

(B)

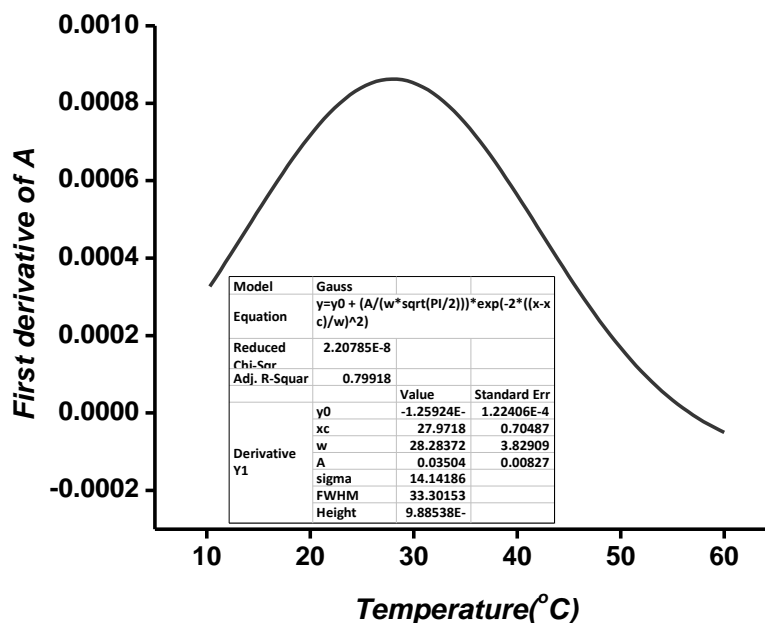

**Figure S50:** Thermal melting curve of duplexes in 40mM phosphate buffer (pH = 7) (A) PMO11-DNA (B) First derivative plot PMO11-DNA

5'-T-T-T-T-A-C-U-C-A-C-A-T-3'

(A)

3'-A<sub>r</sub>A<sub>r</sub>A<sub>r</sub>A<sub>r</sub>U<sub>r</sub>G<sub>r</sub>A<sub>r</sub>G<sub>r</sub>U<sub>r</sub>G<sub>r</sub>U<sub>r</sub>A<sub>r</sub>-5'

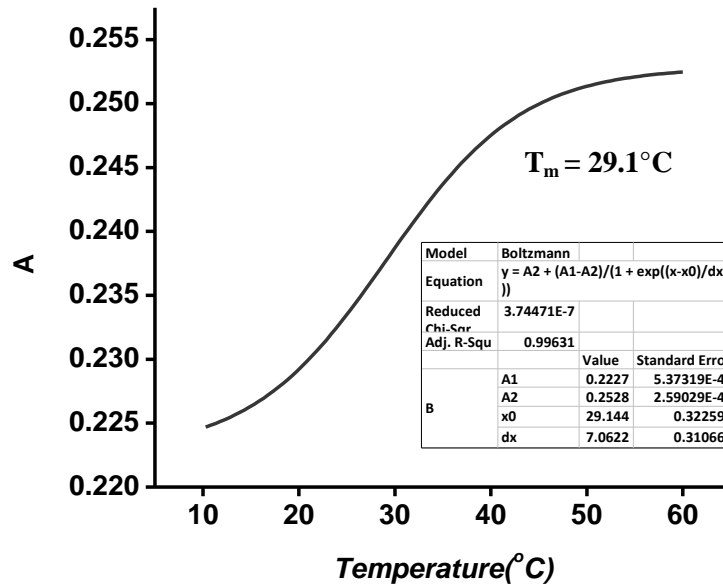

(B)

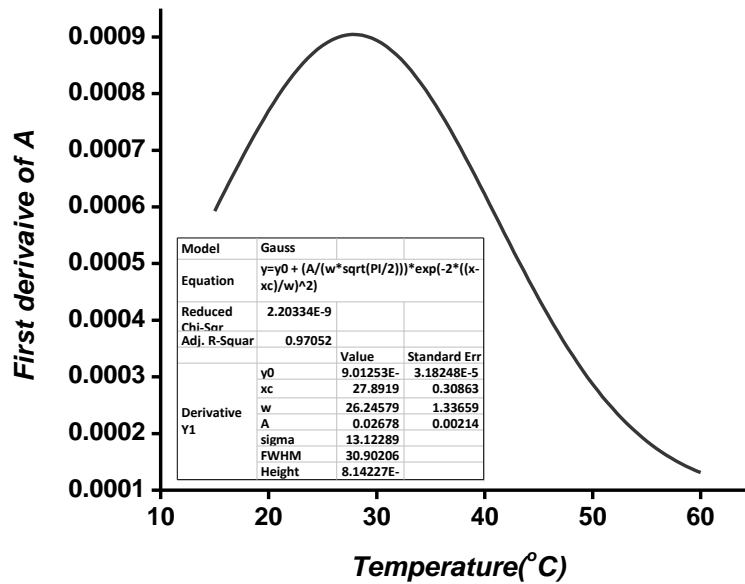

**Figure S51:** Thermal melting curve of duplexes in 40mM phosphate buffer (pH = 7) (A) PMO11-RNA (B) First derivative plot PMO11-RNA

(A)

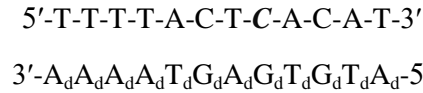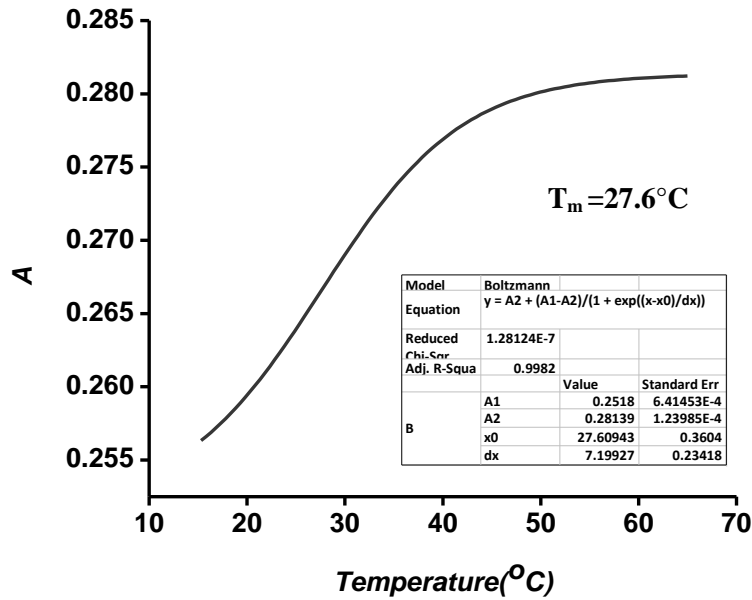

(B)

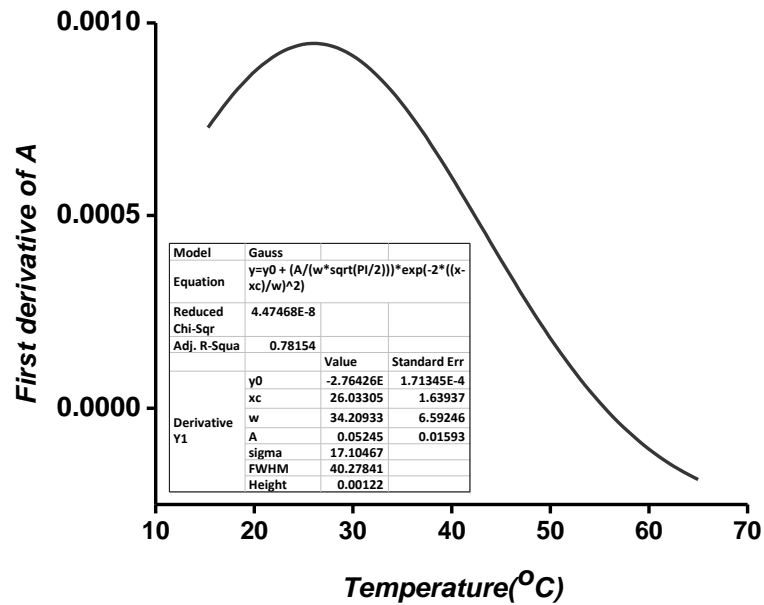

**Figure S52:** Thermal melting curve of duplexes in 40mM phosphate buffer (pH = 7) (A) PMO12-DNA (B) First derivative plot PMO12-DNA

(A)

5'-T-T-T-T-A-C-T-C-A-C-A-T-3'

3'-A<sub>r</sub>A<sub>r</sub>A<sub>r</sub>A<sub>r</sub>A<sub>r</sub>U<sub>r</sub>G<sub>r</sub>A<sub>r</sub>G<sub>r</sub>U<sub>r</sub>G<sub>r</sub>U<sub>r</sub>A<sub>r</sub>-5'

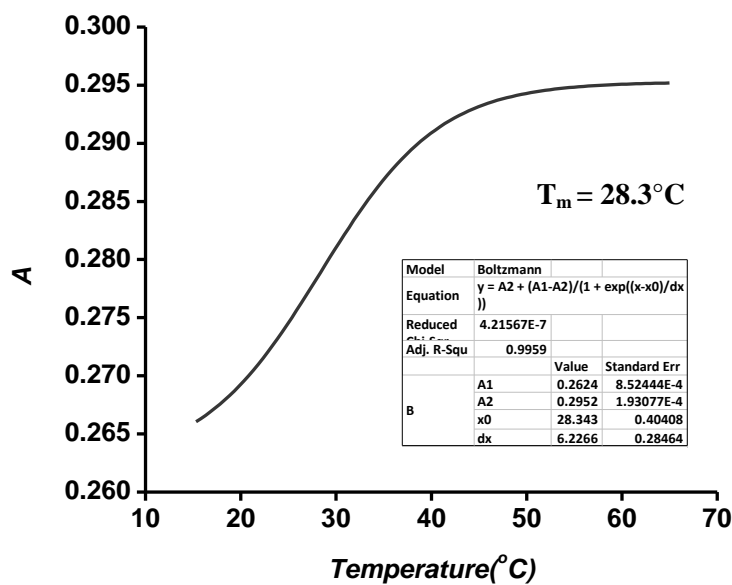

(B)

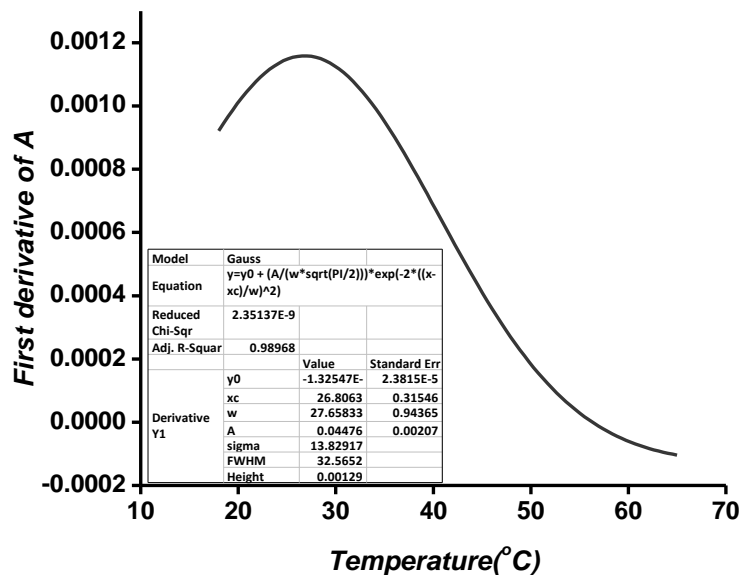

**Figure S53:** Thermal melting curve of duplexes in 40mM phosphate buffer (pH = 7) (A) PMO12-RNA (B) First derivative plot PMO12-RNA

(A)

5'-T-T-T-T-A-C-U-C-A-C-A-T-3'

3'-A<sub>d</sub>A<sub>d</sub>A<sub>d</sub>A<sub>d</sub>T<sub>d</sub>G<sub>d</sub>A<sub>d</sub>G<sub>d</sub>T<sub>d</sub>G<sub>d</sub>T<sub>d</sub>A<sub>d</sub>-5'

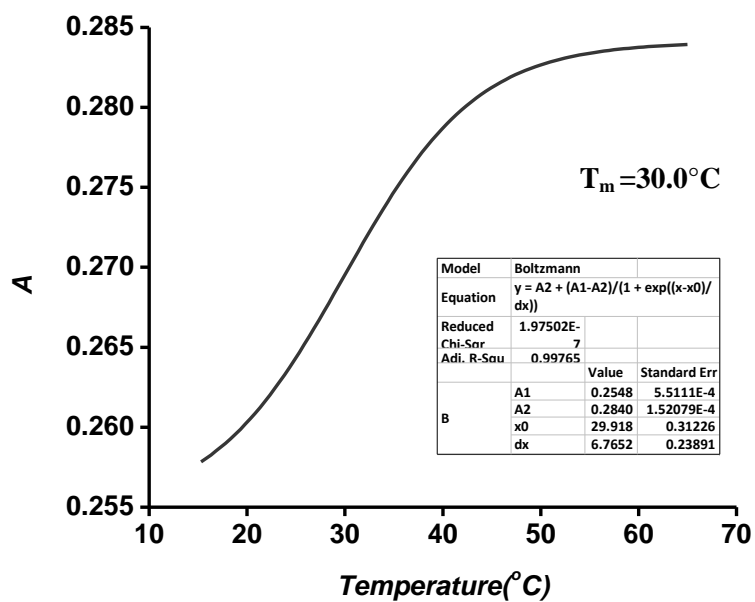

(B)

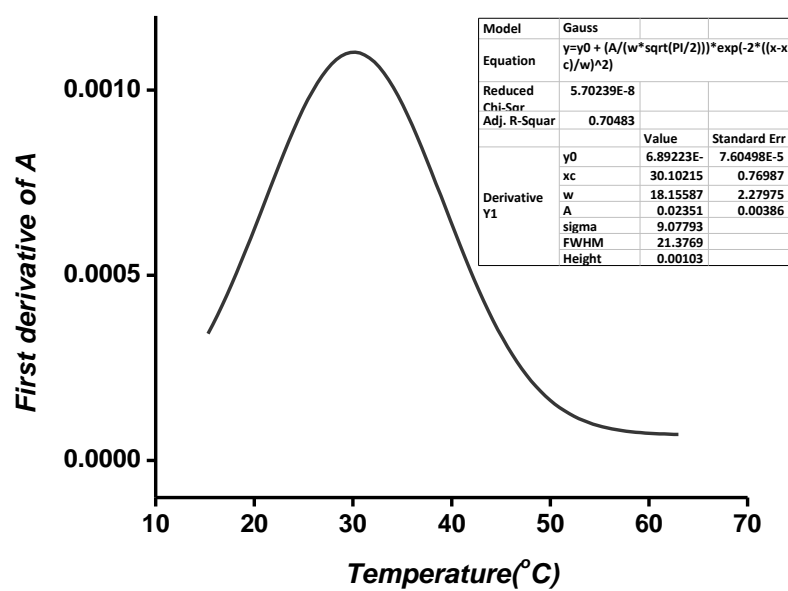

**Figure S54:** Thermal melting curve of duplexes in 40mM phosphate buffer (pH = 7) (A) PMO13-DNA (B) First derivative plot PMO13-DNA

(A)

5'-T-T-T-T-A-C-U-C-A-C-A-T-3'

3'-A<sub>r</sub>A<sub>r</sub>A<sub>r</sub>A<sub>r</sub>U<sub>r</sub>G<sub>r</sub>A<sub>r</sub>G<sub>r</sub>U<sub>r</sub>G<sub>r</sub>U<sub>r</sub>A<sub>r</sub>-5'

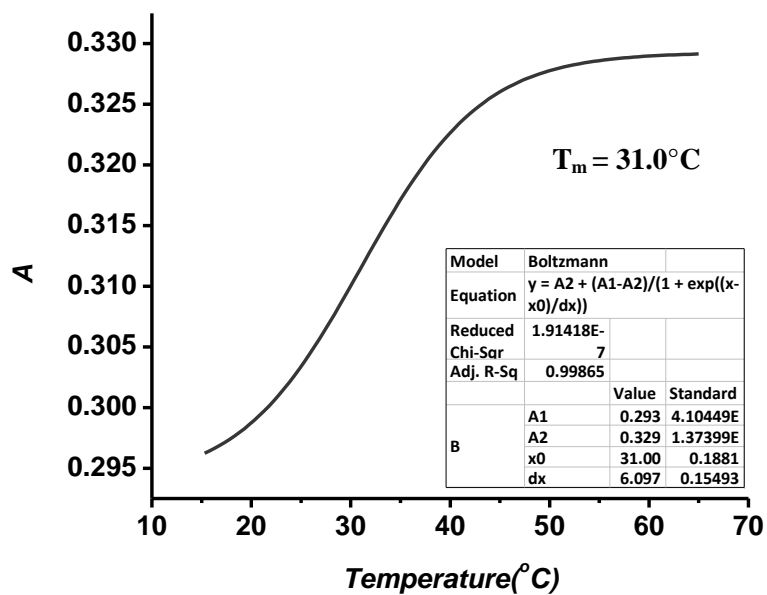

(B)

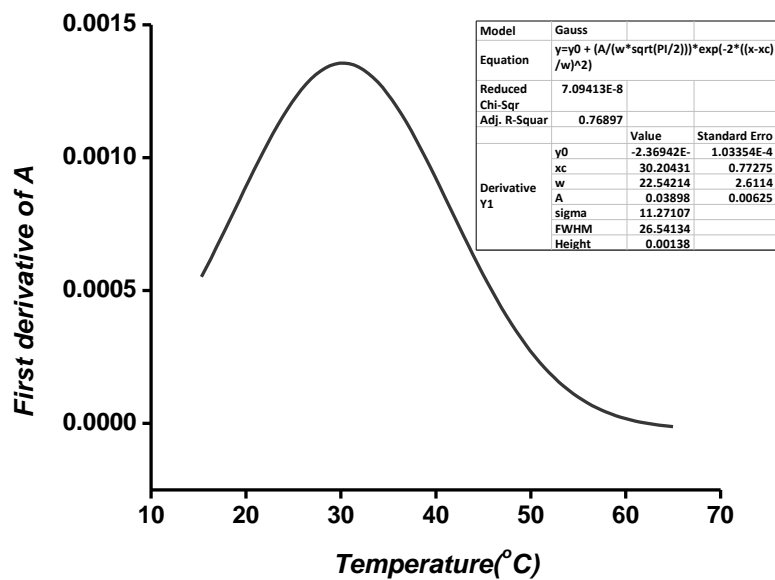

**Figure S55:** Thermal melting curve of duplexes in 40mM phosphate buffer (pH = 7) (A) PMO13-RNA (B) First derivative plot PMO13-RNA



(A)

5'-T-T-T-T-A-C-T-C-A-C-A-T-3'

3'-A<sub>d</sub>A<sub>d</sub>A<sub>d</sub>A<sub>d</sub>T<sub>d</sub>G<sub>d</sub>A<sub>d</sub>G<sub>d</sub>T<sub>d</sub>G<sub>d</sub>T<sub>d</sub>A<sub>d</sub>-5'

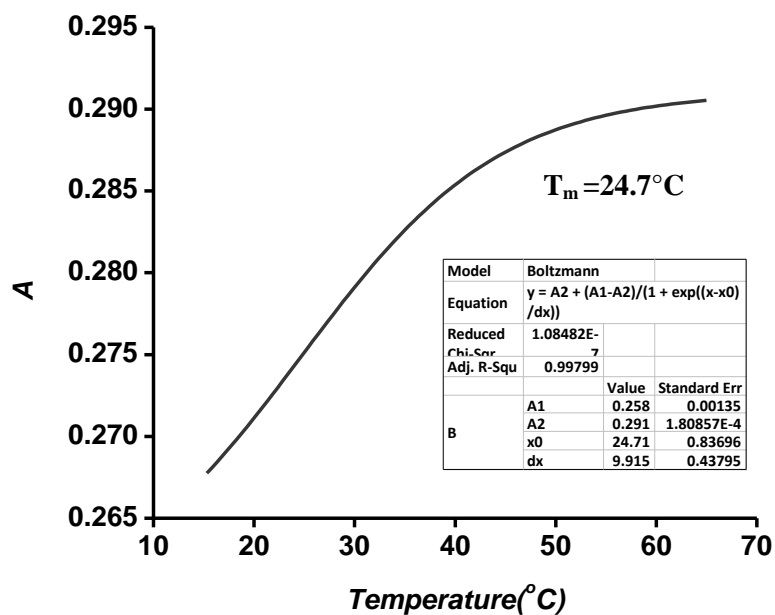

(B)

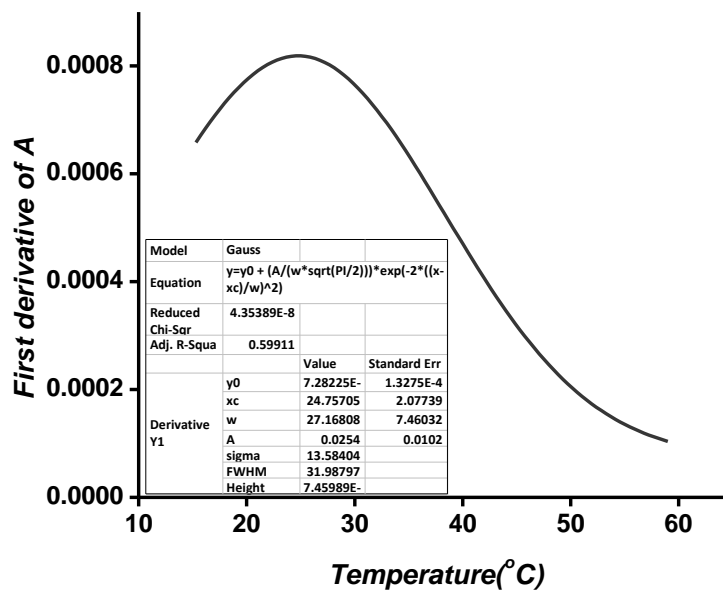

**Figure S56:** Thermal melting curve of duplexes in 40mM phosphate buffer (pH = 7) (A) PMO14-DNA (B) First derivative plot PMO14-DNA

(A)

5'-T-T-T-T-A-C-T-C-A-C-A-T-3'

3'-A<sub>r</sub>A<sub>r</sub>A<sub>r</sub>A<sub>r</sub>U<sub>r</sub>G<sub>r</sub>A<sub>r</sub>G<sub>r</sub>U<sub>r</sub>G<sub>r</sub>U<sub>r</sub>A<sub>r</sub>-5'

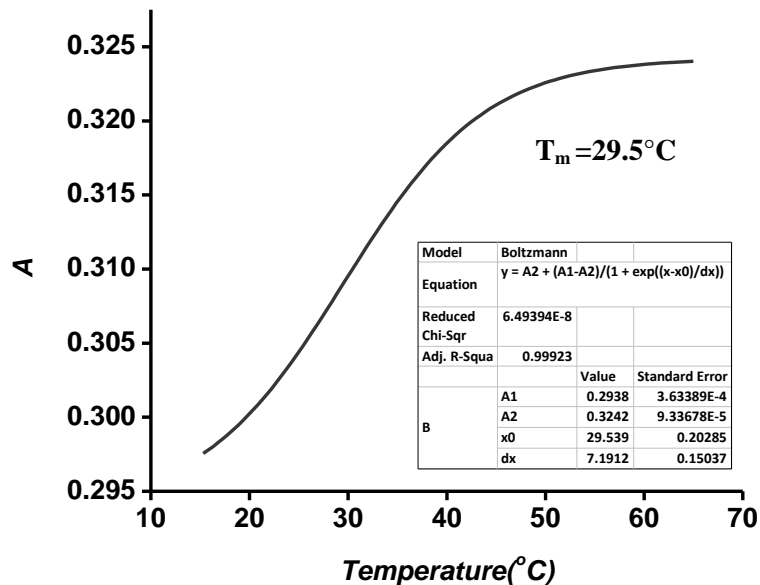

(B)

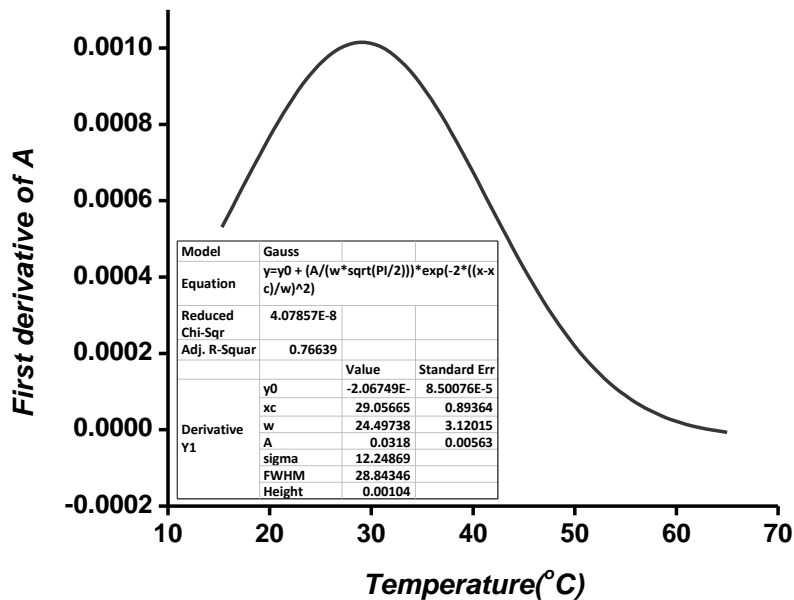

**Figure S57:** Thermal melting curve of duplexes in 40mM phosphate buffer (pH = 7) (A) PMO14-RNA (B) First derivative plot PMO14-RNA

(A)

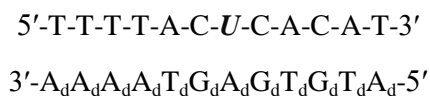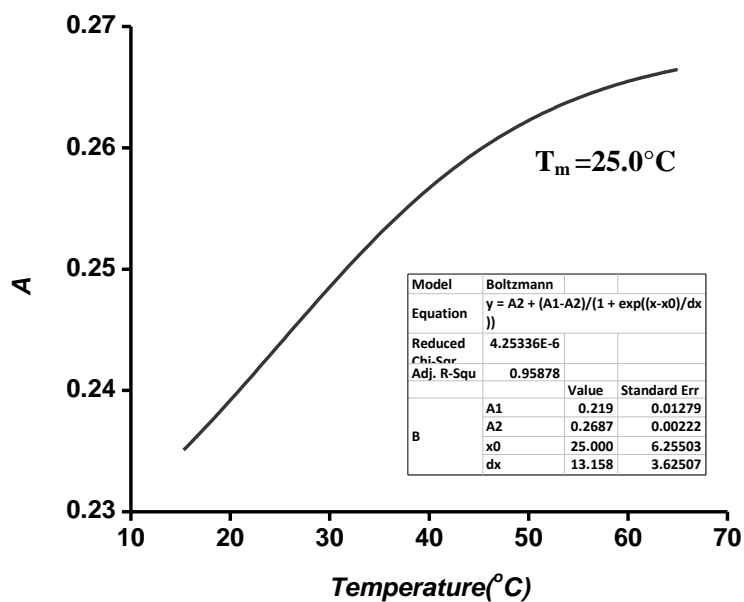

(B)

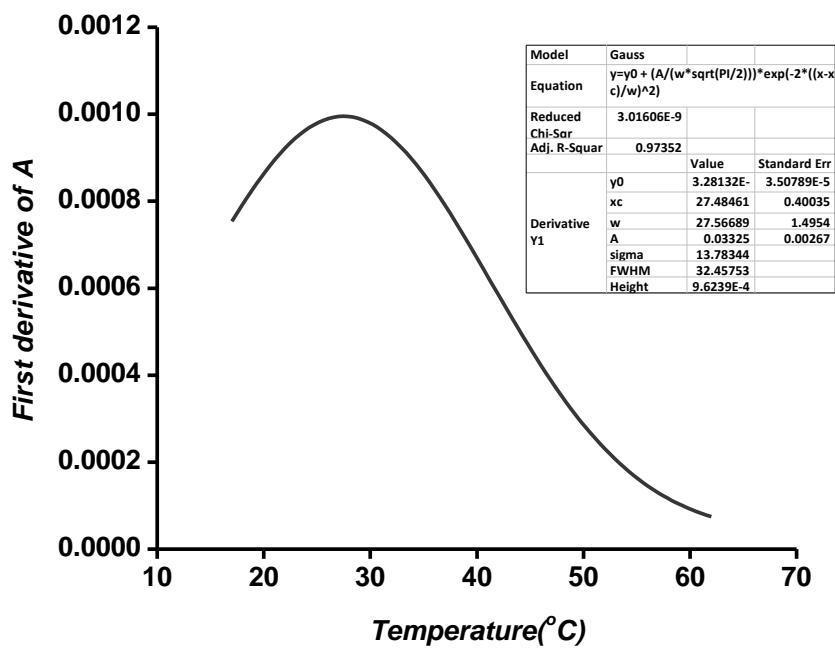

**Figure S58:** Thermal melting curve of duplexes in 40mM phosphate buffer (pH = 7) (A) PMO15-DNA (B) First derivative plot PMO15-DNA

(A)

5'-T-T-T-T-A-C-U-C-A-C-A-T-3'

3'-A<sub>r</sub>A<sub>r</sub>A<sub>r</sub>A<sub>r</sub>U<sub>r</sub>G<sub>r</sub>A<sub>r</sub>G<sub>r</sub>U<sub>r</sub>G<sub>r</sub>U<sub>r</sub>A<sub>r</sub>-5'

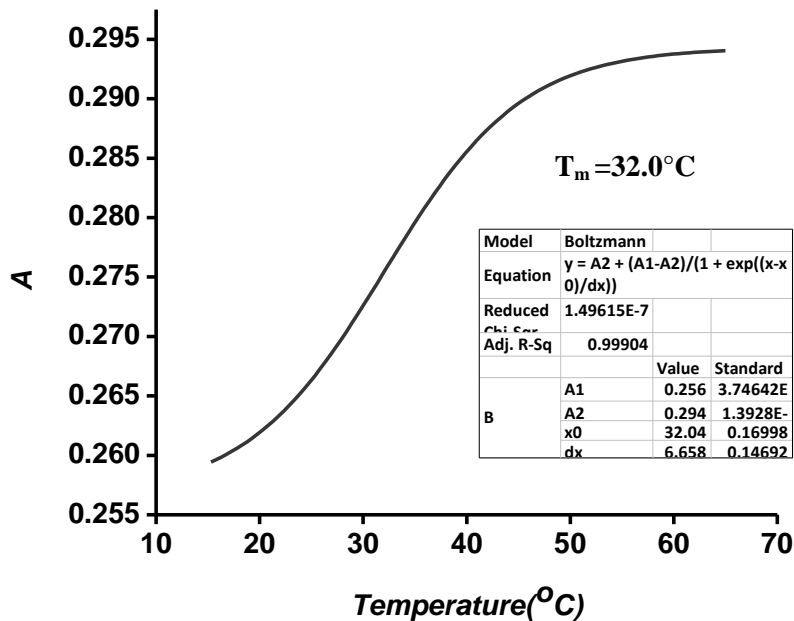

(B)

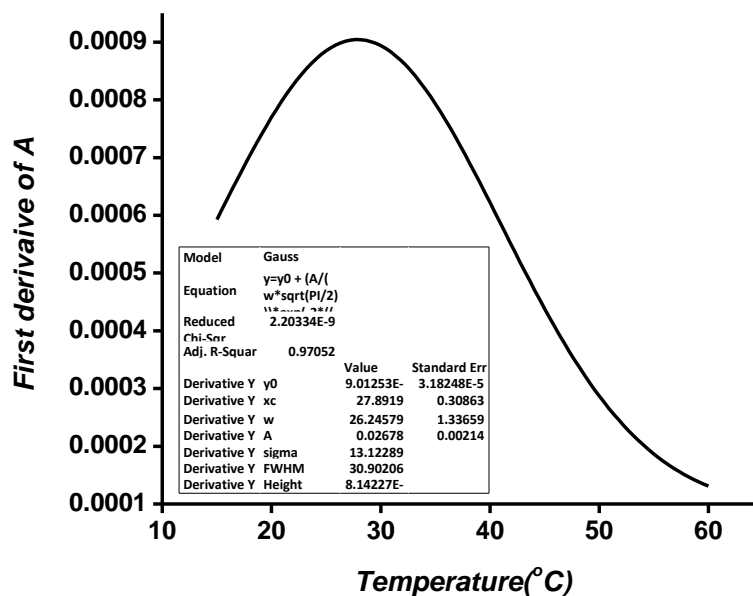

**Figure S59:** Thermal melting curve of duplexes in 40mM phosphate buffer (pH = 7) (A) PMO15-RNA (B) First derivative plot PMO15-RNA

(A)

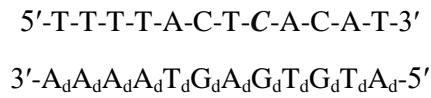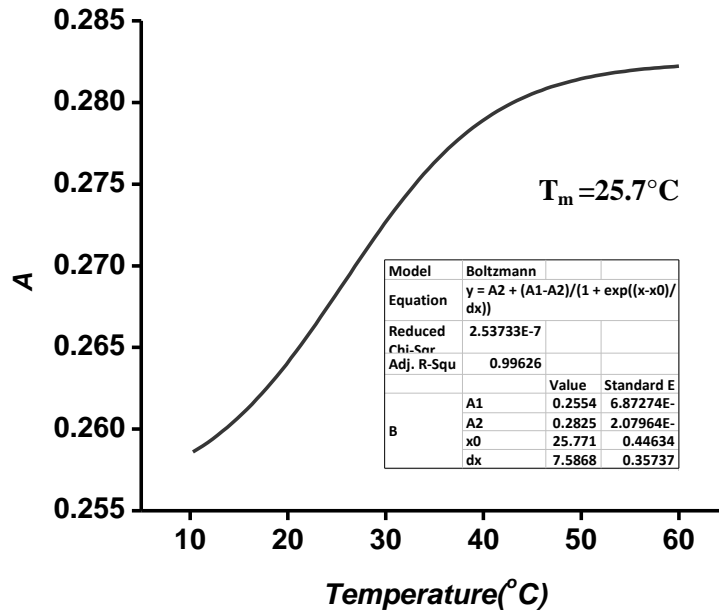

(B)

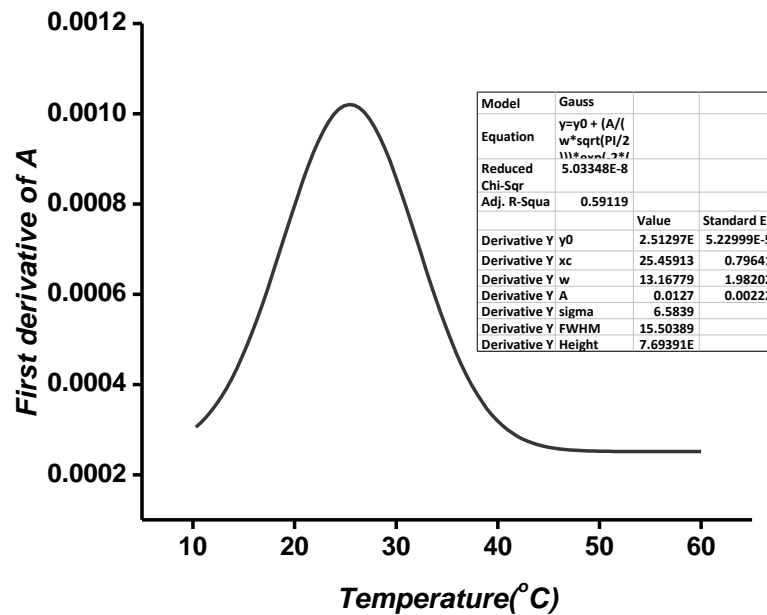

**Figure S60:** Thermal melting curve of duplexes in 40mM phosphate buffer (pH = 7) (A) PMO16-DNA (B) First derivative plot PMO16-DNA

(A)

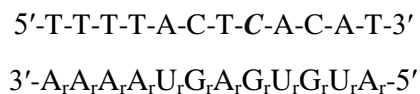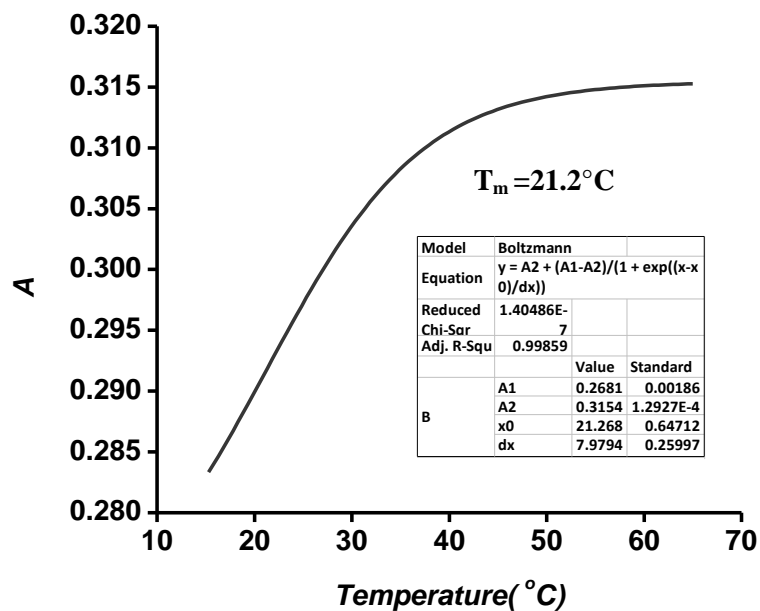

(B)

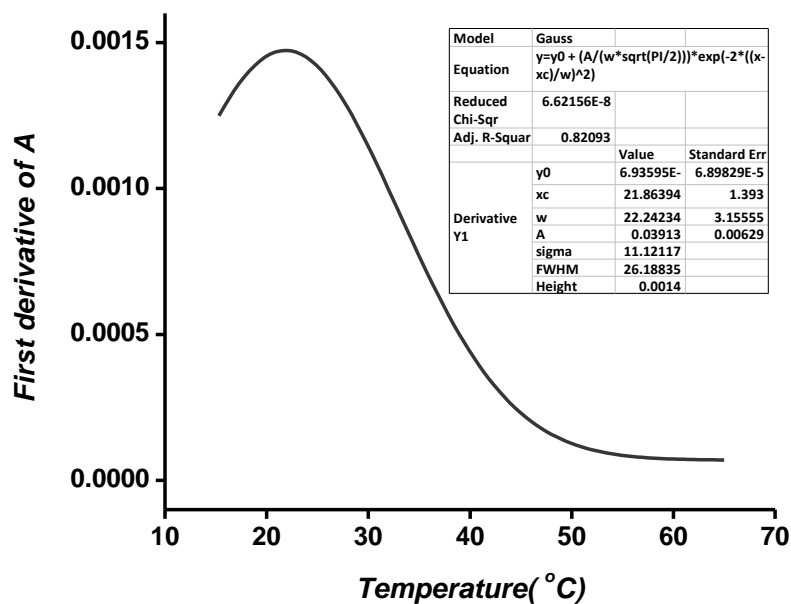

**Figure S61:** Thermal melting curve of duplexes in 40mM phosphate buffer (pH = 7) (A) PMO16-RNA (B) First derivative plot PMO16-RNA

(A)

5'-T-T-T-T-A-C-U-C-A-C-A-T-3'

3'-A<sub>d</sub>A<sub>d</sub>A<sub>d</sub>A<sub>d</sub>T<sub>d</sub>G<sub>d</sub>A<sub>d</sub>G<sub>d</sub>T<sub>d</sub>G<sub>d</sub>T<sub>d</sub>A<sub>d</sub>-5'

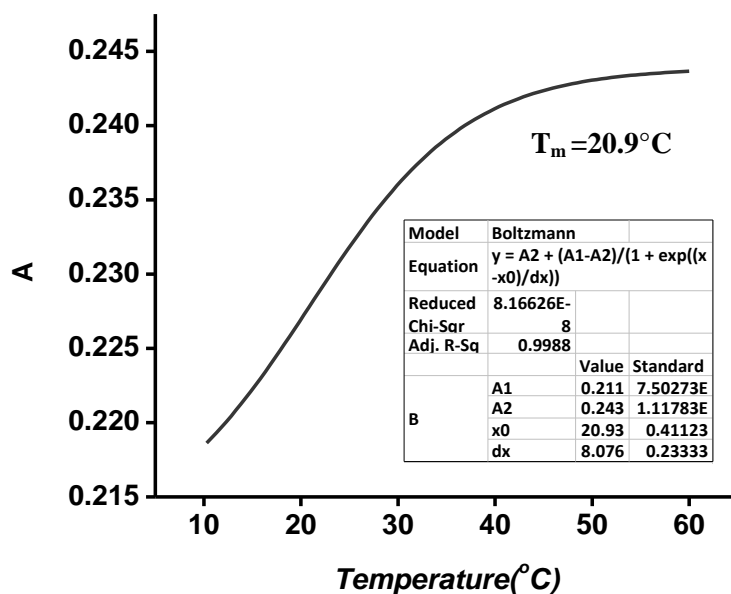

(B)

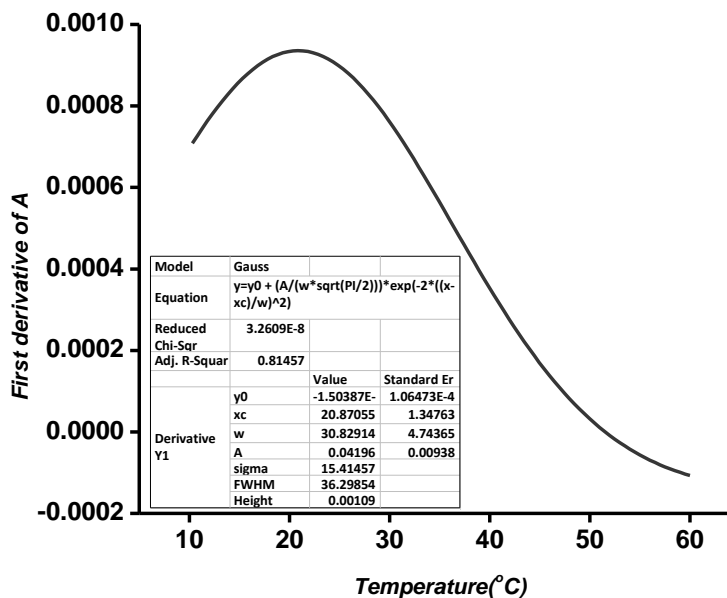

**Figure S62:** Thermal melting curve of duplexes in 40mM phosphate buffer (pH = 7) (A) PMO17-DNA (B) First derivative plot PMO17-DNA

(A)

5'-T-T-T-T-A-C-U-C-A-C-A-T-3'

3'-A<sub>r</sub>A<sub>r</sub>A<sub>r</sub>A<sub>r</sub>U<sub>r</sub>G<sub>r</sub>A<sub>r</sub>G<sub>r</sub>U<sub>r</sub>G<sub>r</sub>U<sub>r</sub>A<sub>r</sub>-5'

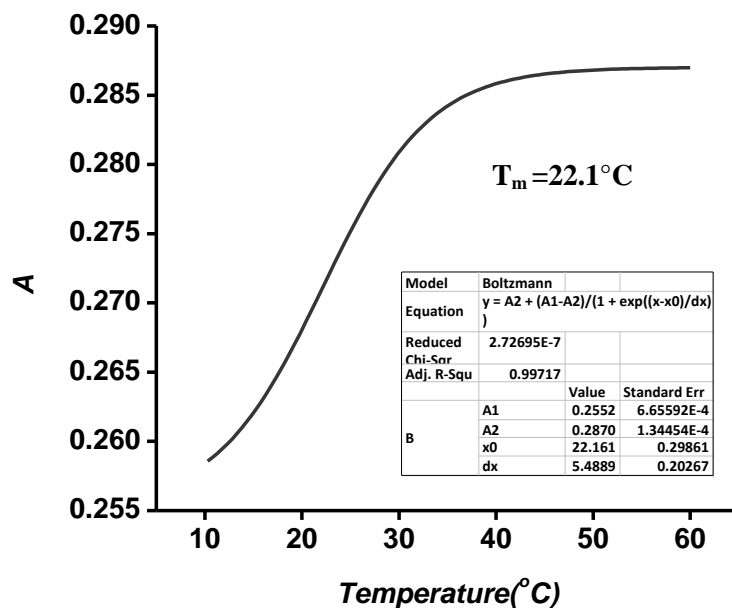

(B)

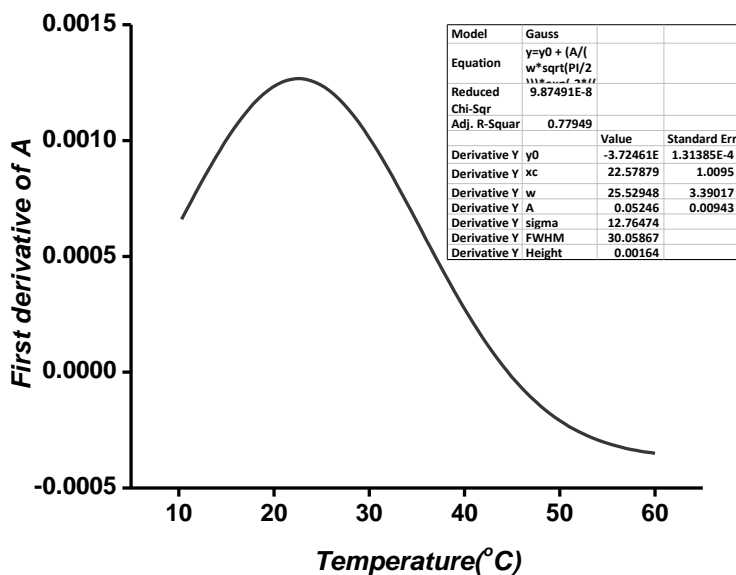

**Figure S63:** Thermal melting curve of duplexes in 40mM phosphate buffer (pH = 7) (A) PMO17-RNA (B) First derivative plot PMO17-RNA



5'-T-T-T-T-A-C-U-C-A-C-A-T-3'

3'-A<sub>d</sub>A<sub>d</sub>A<sub>d</sub>A<sub>d</sub>T<sub>d</sub>G<sub>d</sub>A<sub>d</sub>G<sub>d</sub>T<sub>d</sub>G<sub>d</sub>T<sub>d</sub>A<sub>d</sub>-5'

(A)

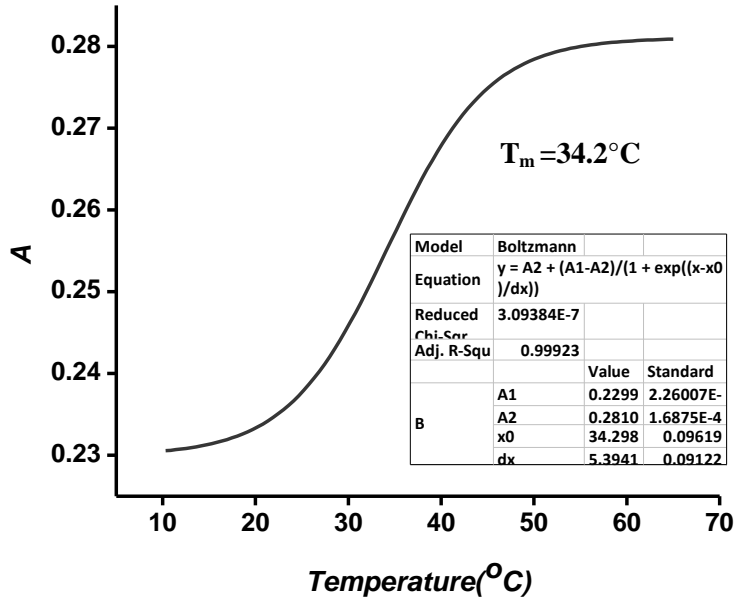

(B)

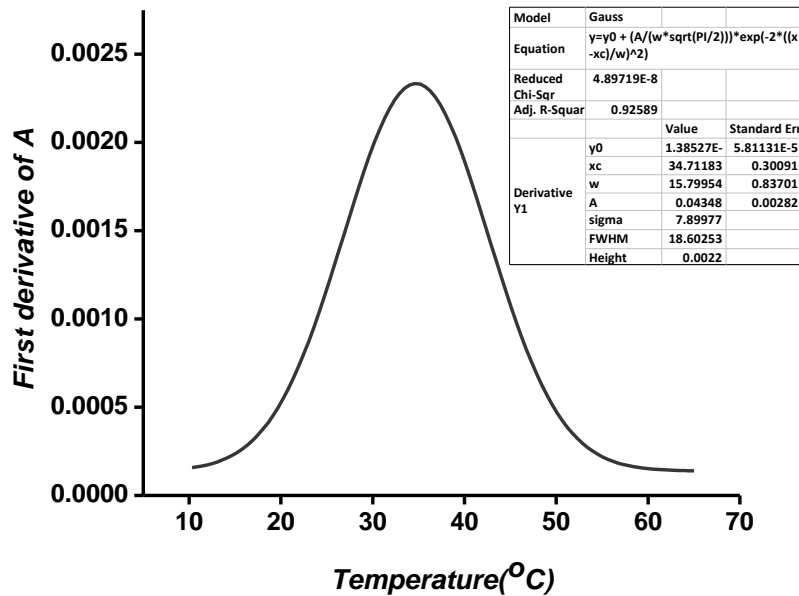

**Figure S64:** Thermal melting curve of duplexes in 40mM phosphate buffer (pH = 7) (A) PMO18-DNA (B) First derivative plot PMO18-DNA

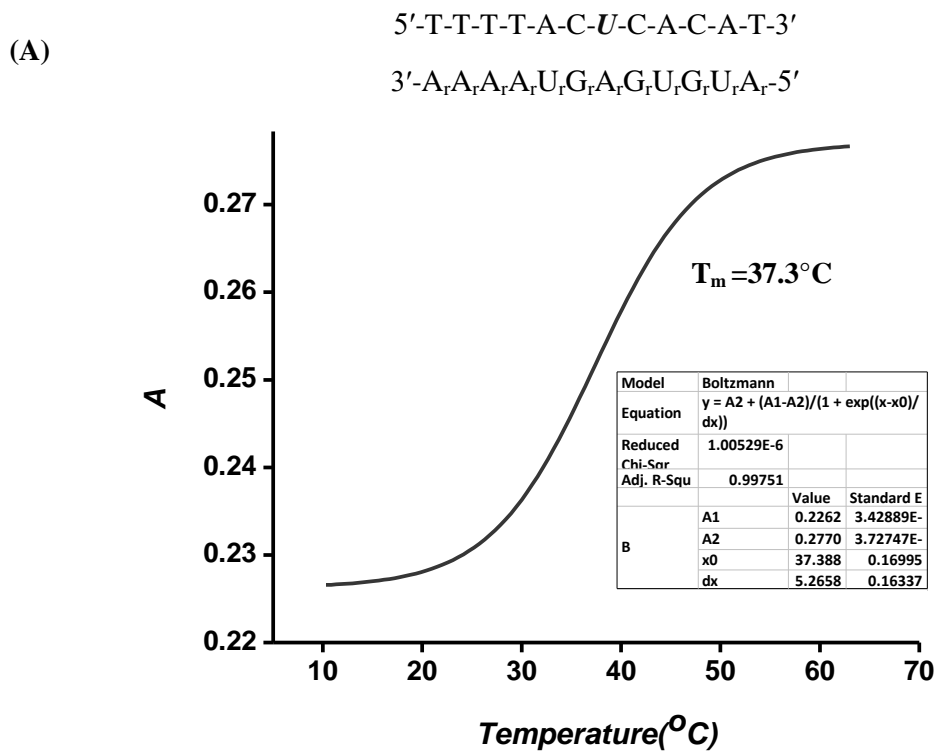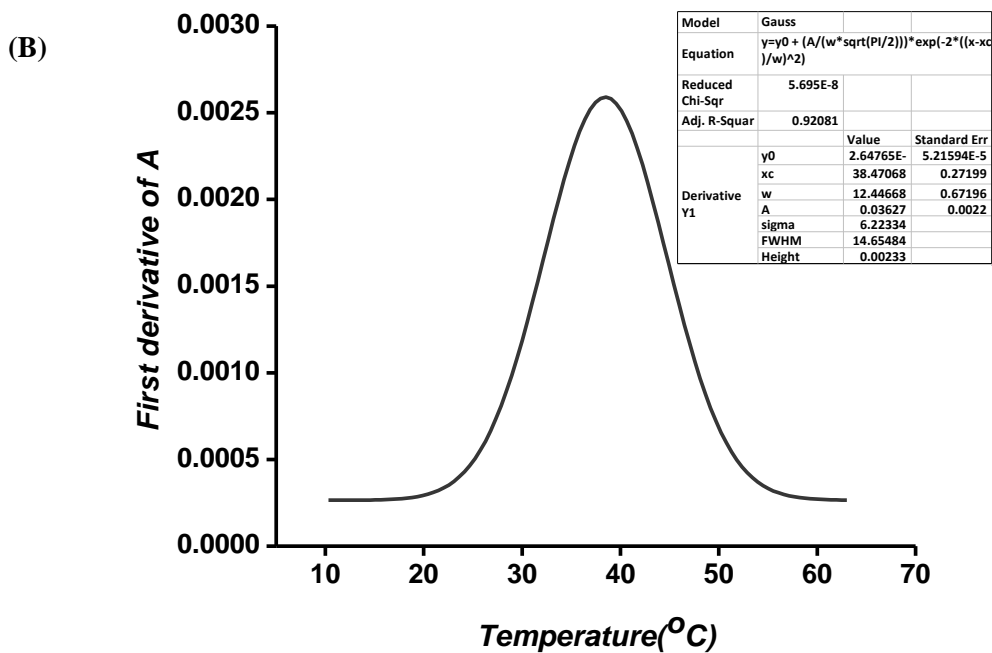

**Figure S65:** Thermal melting curve of duplexes in 40mM phosphate buffer (pH = 7) (A) PMO18-RNA (B) First derivative plot PMO18-RNA

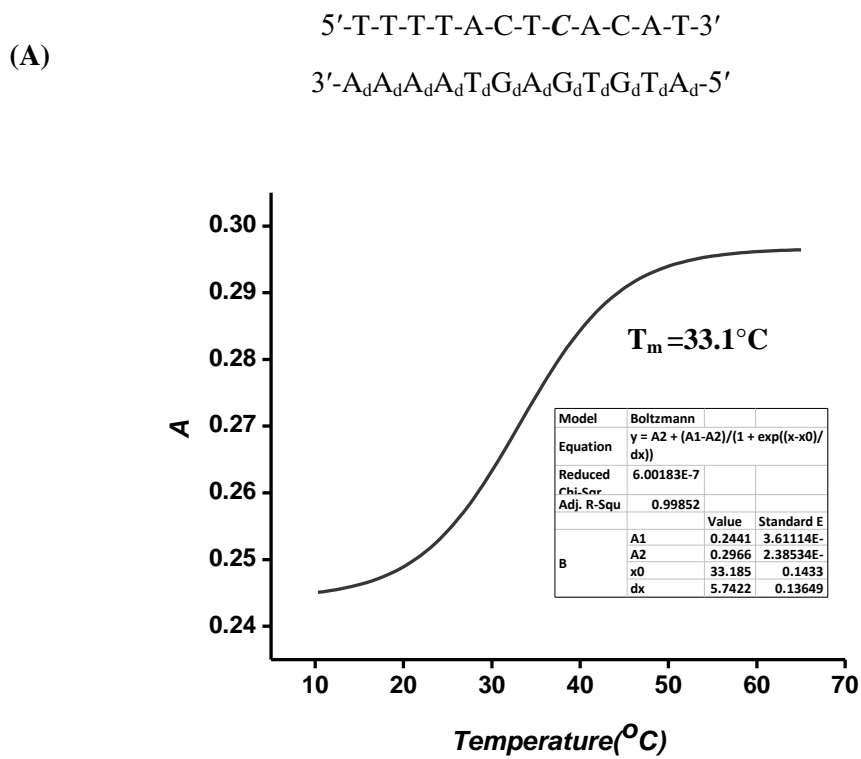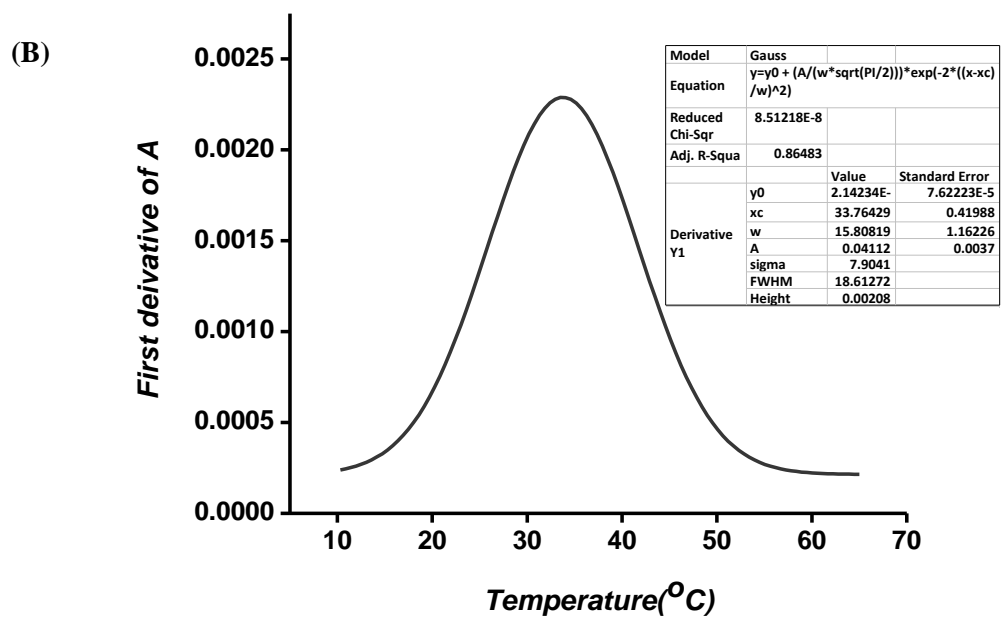

**Figure S66:** Thermal melting curve of duplexes in 40mM phosphate buffer (pH = 7) (A) PMO19-DNA (B) First derivative plot PMO19-DNA

(A)

5'-T-T-T-T-A-C-T-C-A-C-A-T-3'

3'-A<sub>r</sub>A<sub>r</sub>A<sub>r</sub>A<sub>r</sub>U<sub>r</sub>G<sub>r</sub>A<sub>r</sub>G<sub>r</sub>U<sub>r</sub>G<sub>r</sub>U<sub>r</sub>A<sub>r</sub>-5'

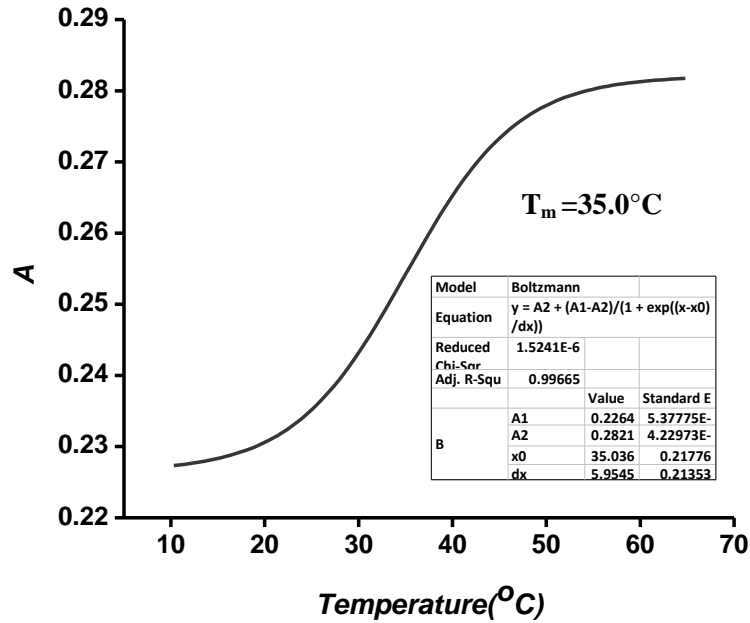

(B)

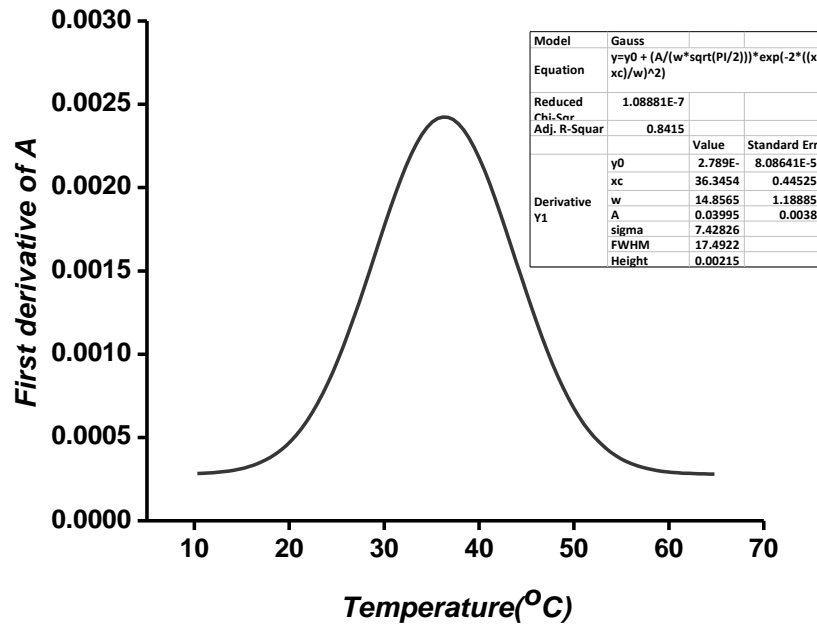

**Figure S67:** Thermal melting curve of duplexes in 40mM phosphate buffer (pH = 7) (A) PMO19-RNA (B) First derivative plot PMO19-RNA

(A)

5'-T-T-T-T-A-C-T-C-A-C-A-T-3'

3'-A<sub>d</sub>A<sub>d</sub>A<sub>d</sub>A<sub>d</sub>T<sub>d</sub>G<sub>d</sub>A<sub>d</sub>G<sub>d</sub>T<sub>d</sub>G<sub>d</sub>T<sub>d</sub>A<sub>d</sub>-5'

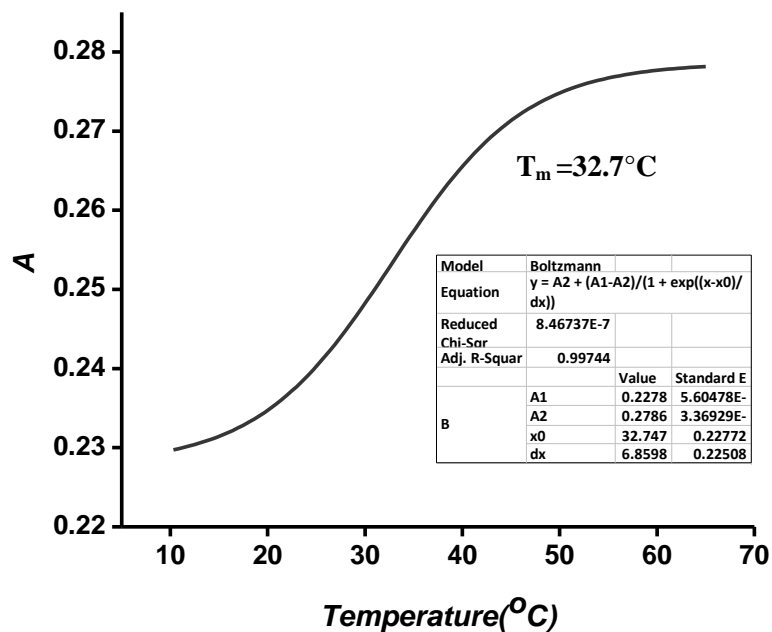

(B)

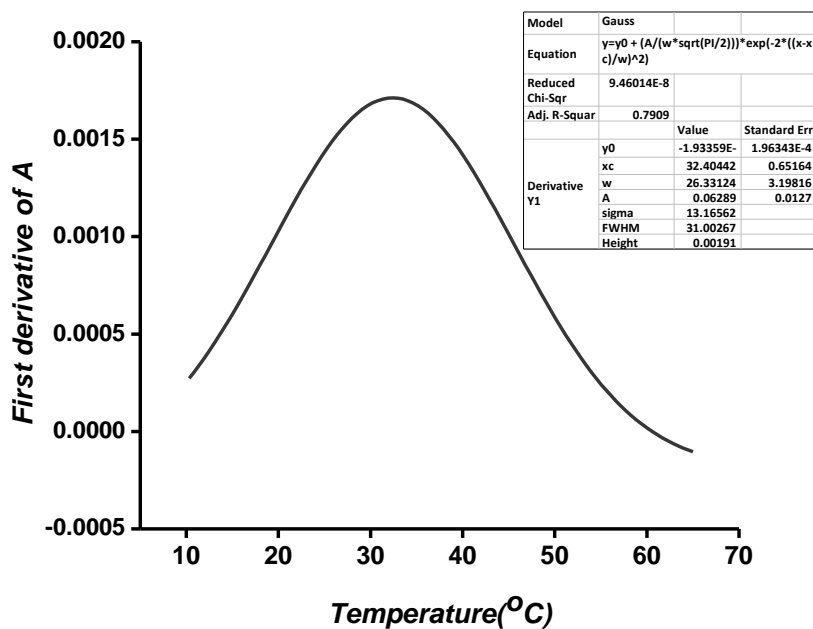

**Figure S68:** Thermal melting curve of duplexes in 40mM phosphate buffer (pH = 7) (A) PMO20-DNA (B) First derivative plot PMO20-DNA

(A)

5'-T-T-T-T-A-C-T-C-A-C-A-T-3'

3'-A<sub>r</sub>A<sub>r</sub>A<sub>r</sub>A<sub>r</sub>U<sub>r</sub>G<sub>r</sub>A<sub>r</sub>G<sub>r</sub>U<sub>r</sub>G<sub>r</sub>U<sub>r</sub>A<sub>r</sub>-5'

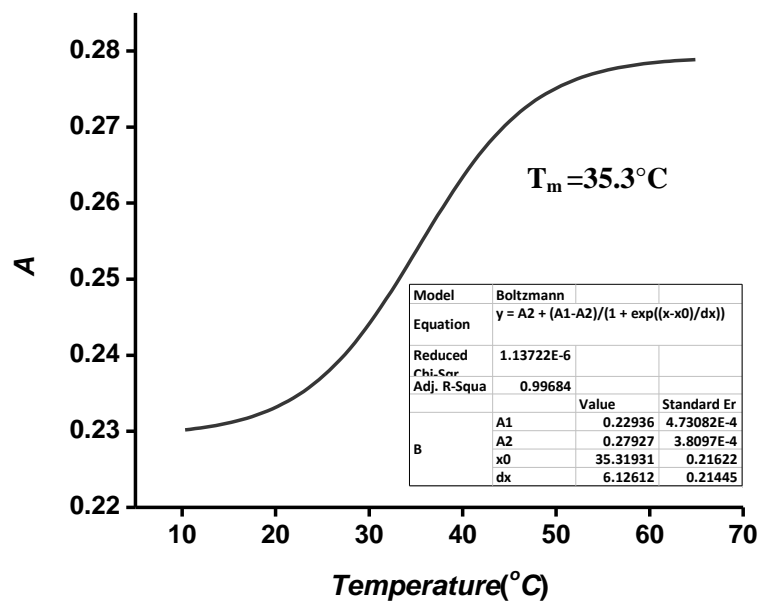

(B)

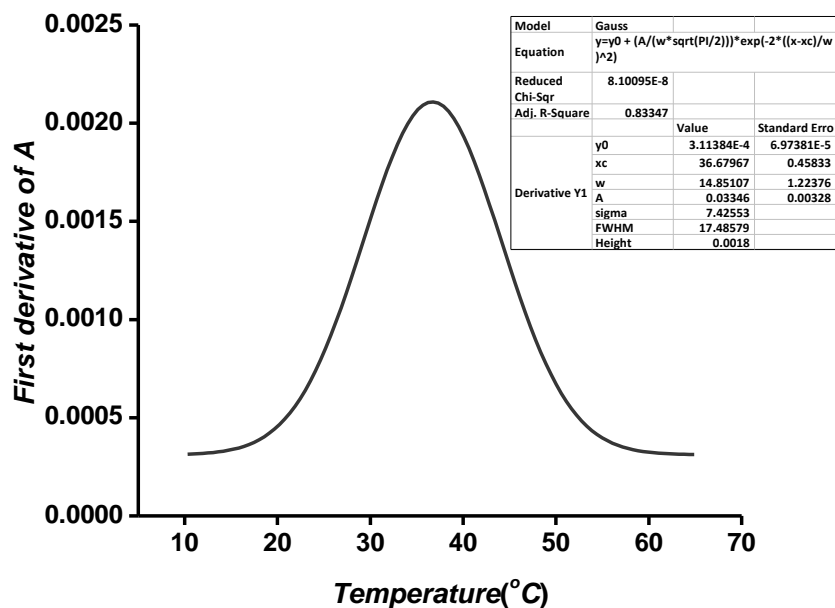

**Figure S69:** Thermal melting curve of duplexes in 40mM phosphate buffer (pH = 7) (A) PMO20-RNA (B) First derivative plot PMO20-RNA

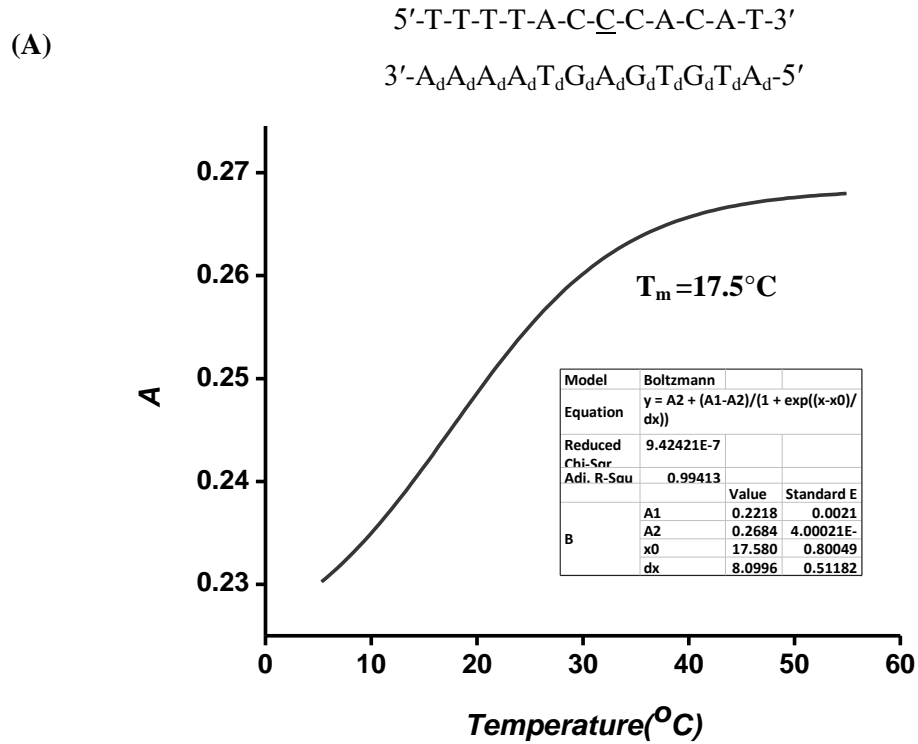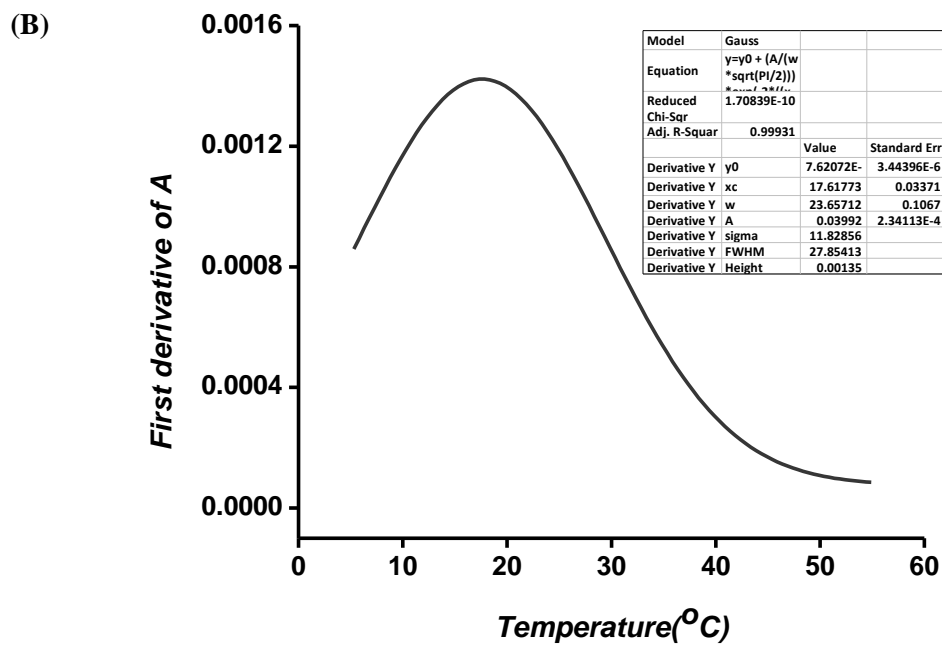

**Figure S70:** Thermal melting curve of duplexes in 40mM phosphate buffer (pH = 7) (A) PMO21-DNA (B) First derivative plot PMO21-DNA

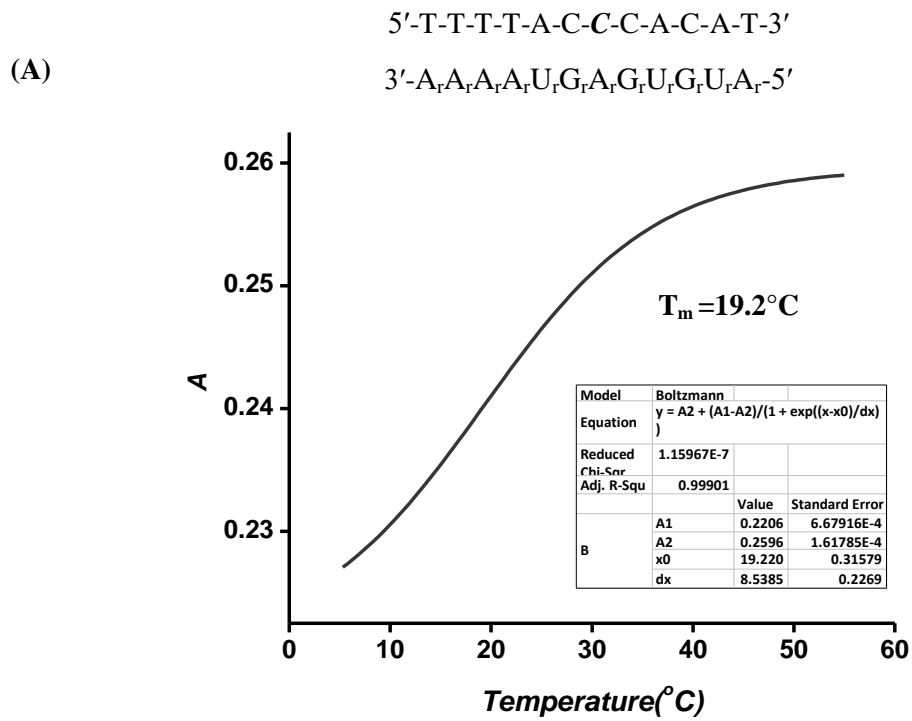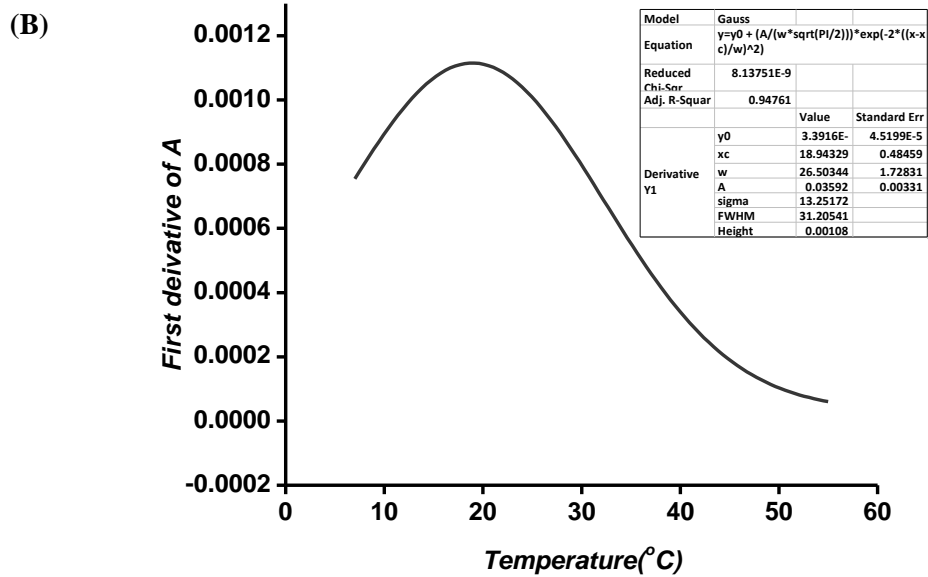

**Figure S71:** Thermal melting curve of duplexes in 40mM phosphate buffer (pH = 7) (A) PMO21-RNA (B) First derivative plot PMO21-RNA



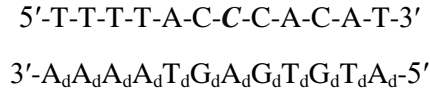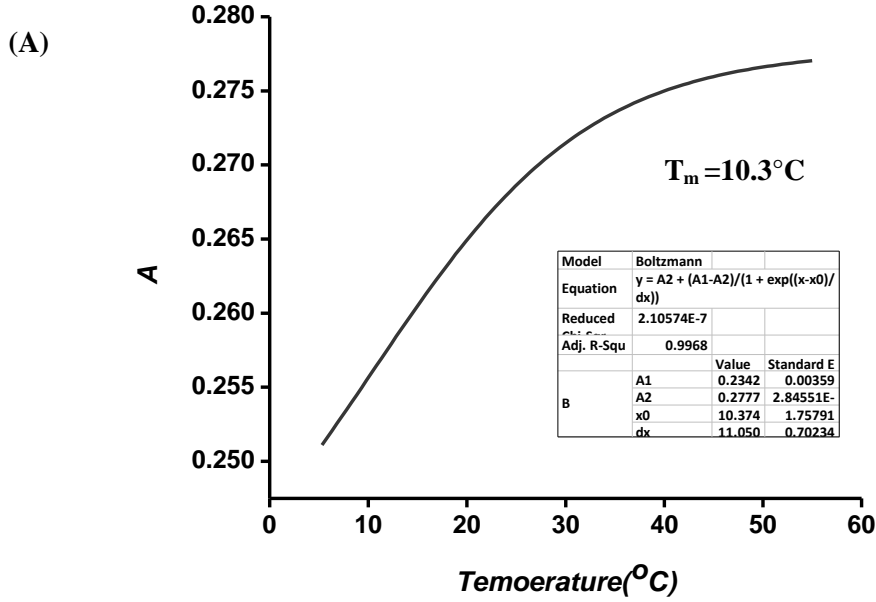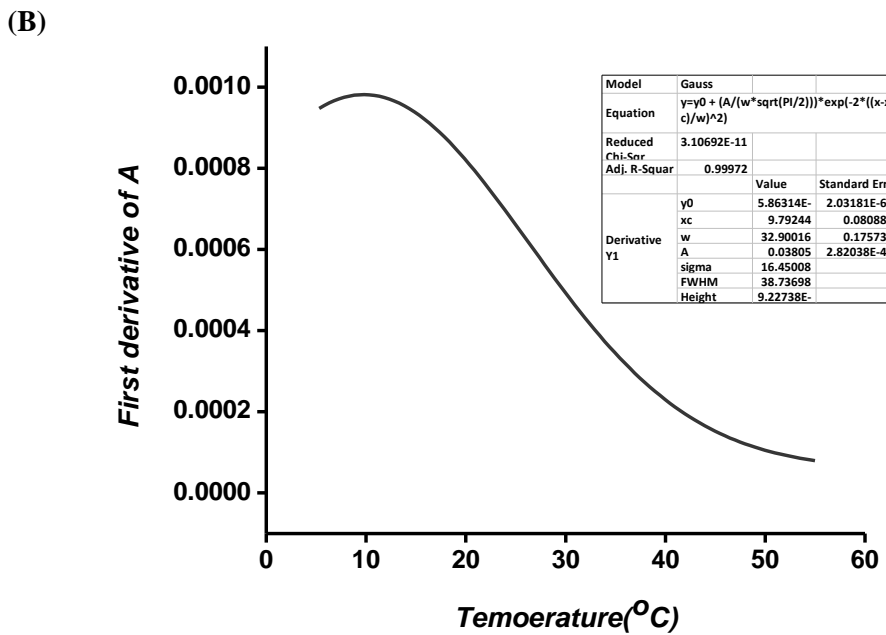

**Figure S72:** Thermal melting curve of duplexes in 40mM phosphate buffer (pH = 7) (A) PMO22-DNA (B) First derivative plot PMO22-DNA

5'-T-T-T-T-A-C-C-C-A-C-A-T-3'  
 3'-A<sub>r</sub>A<sub>r</sub>A<sub>r</sub>A<sub>r</sub>U<sub>r</sub>G<sub>r</sub>A<sub>r</sub>G<sub>r</sub>U<sub>r</sub>G<sub>r</sub>U<sub>r</sub>A<sub>r</sub>-5'

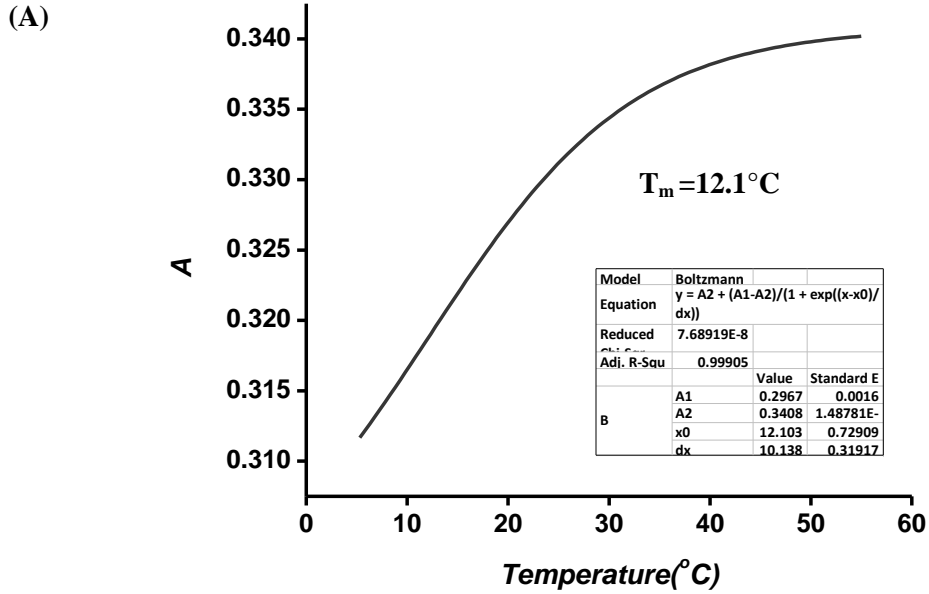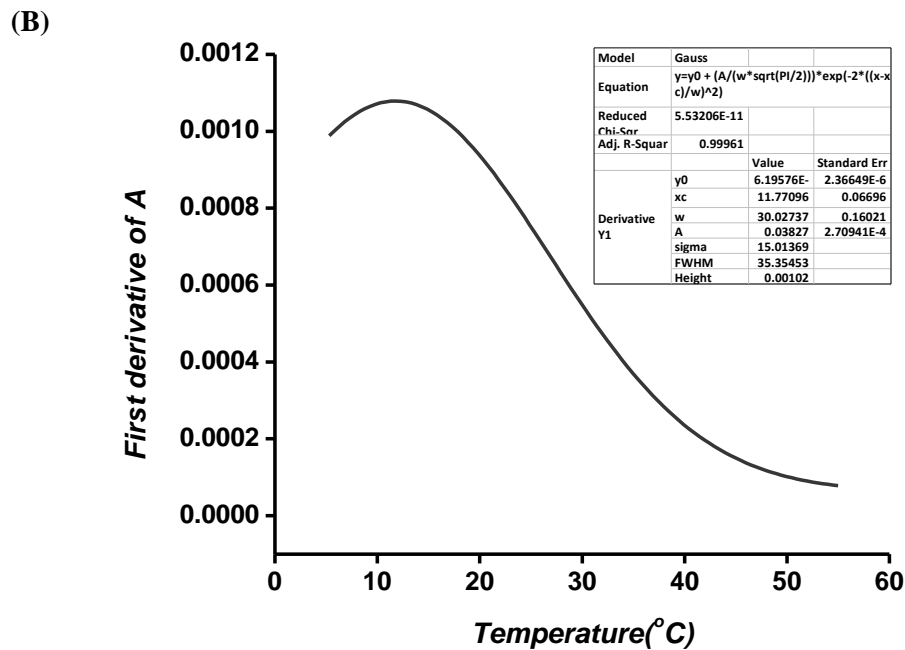

**Figure S73:** Thermal melting curve of duplexes in 40mM phosphate buffer (pH = 7) (A) PMO22-RNA (B) First derivative plot PMO22-RNA

(A)

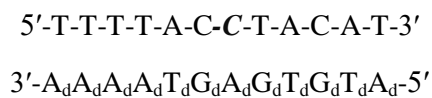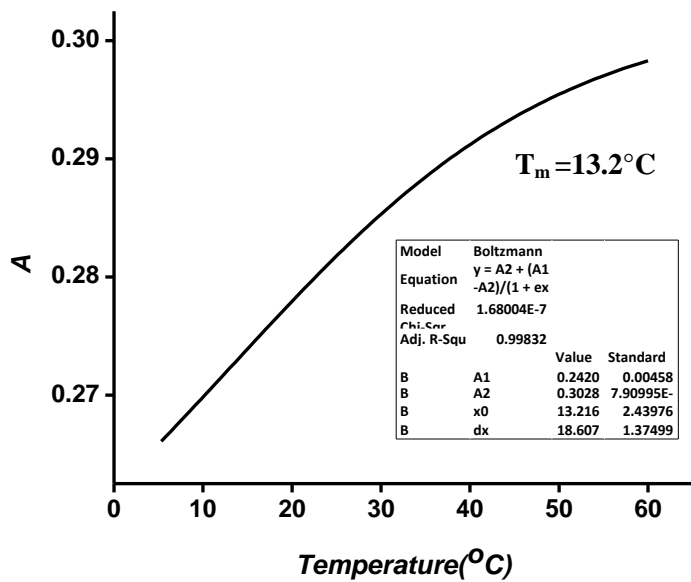

(B)

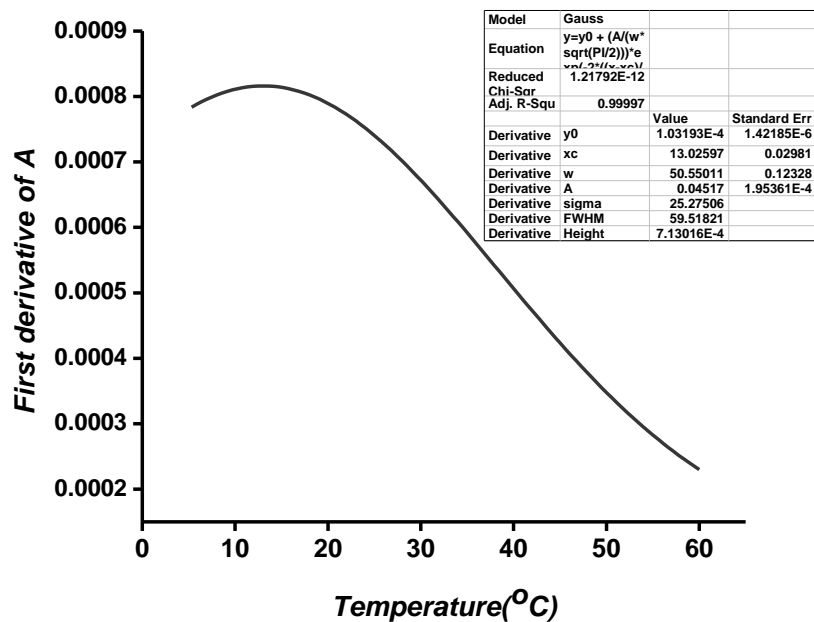

**Figure S74:** Thermal melting curve of duplexes in 40mM phosphate buffer (pH = 7) (A) PMO23-DNA (B) First derivative plot PMO23-DNA

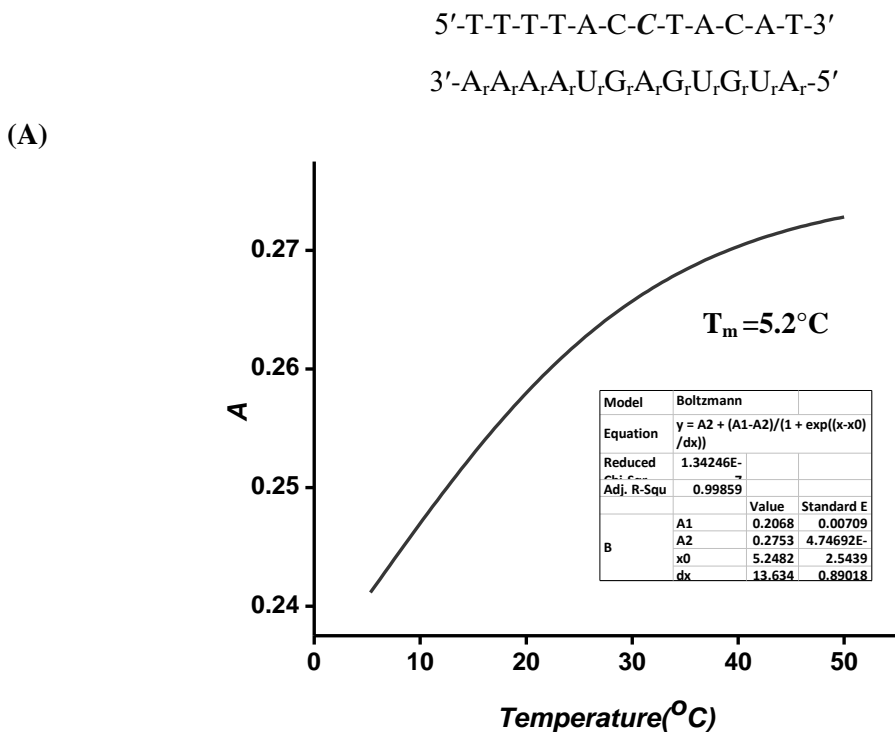

**Figure S75:** Thermal melting curve of duplexes in 40mM phosphate buffer (pH = 7) (A) PMO23-RNA

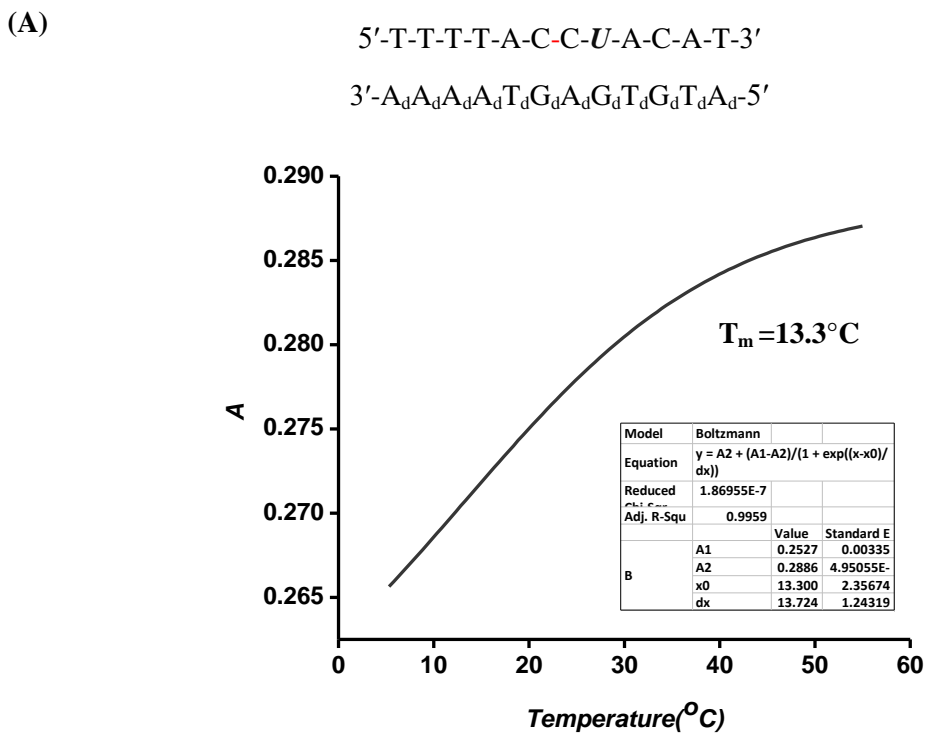

(B)

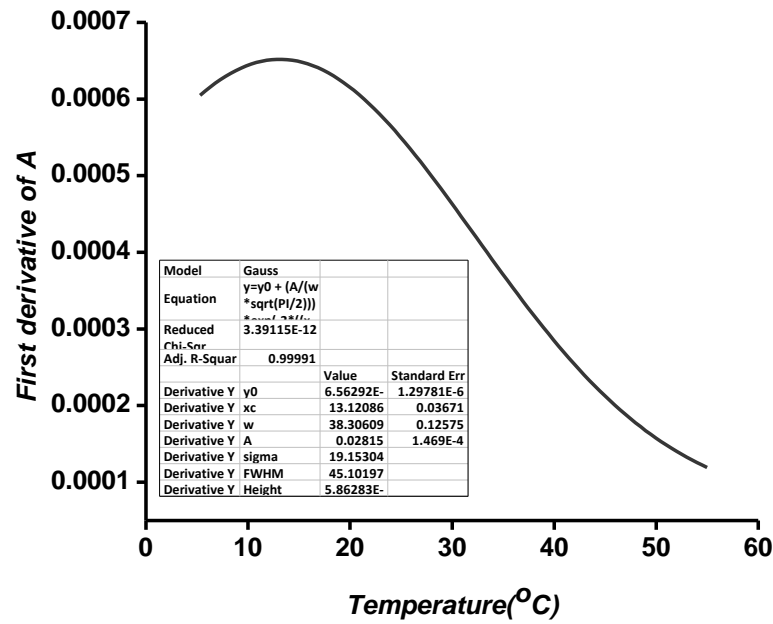

**Figure S76:** Thermal melting curve of duplexes in 40mM phosphate buffer (pH = 7) (A) PMO24-DNA (B) First derivative plot PMO24-DNA

(A)

5'-T-T-T-T-A-C-C-U-A-C-A-T-3'

3'-A<sub>r</sub>A<sub>r</sub>A<sub>r</sub>A<sub>r</sub>U<sub>r</sub>G<sub>r</sub>A<sub>r</sub>G<sub>r</sub>U<sub>r</sub>G<sub>r</sub>U<sub>r</sub>A<sub>r</sub>-5'

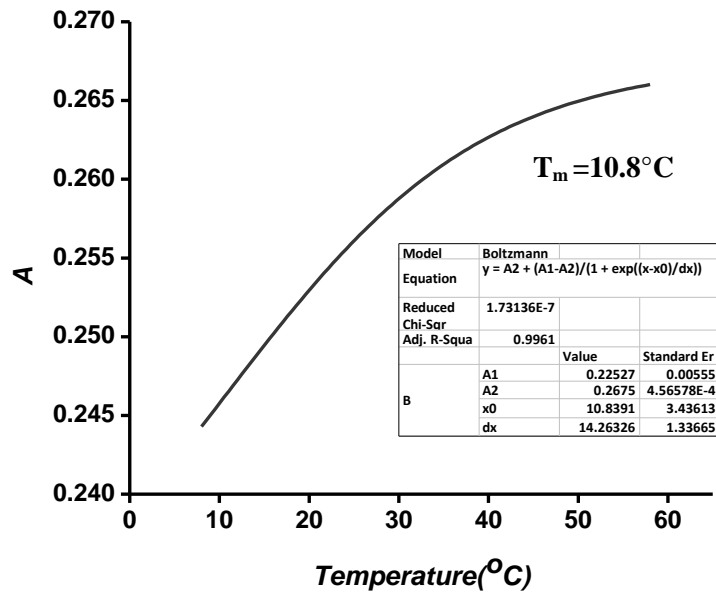

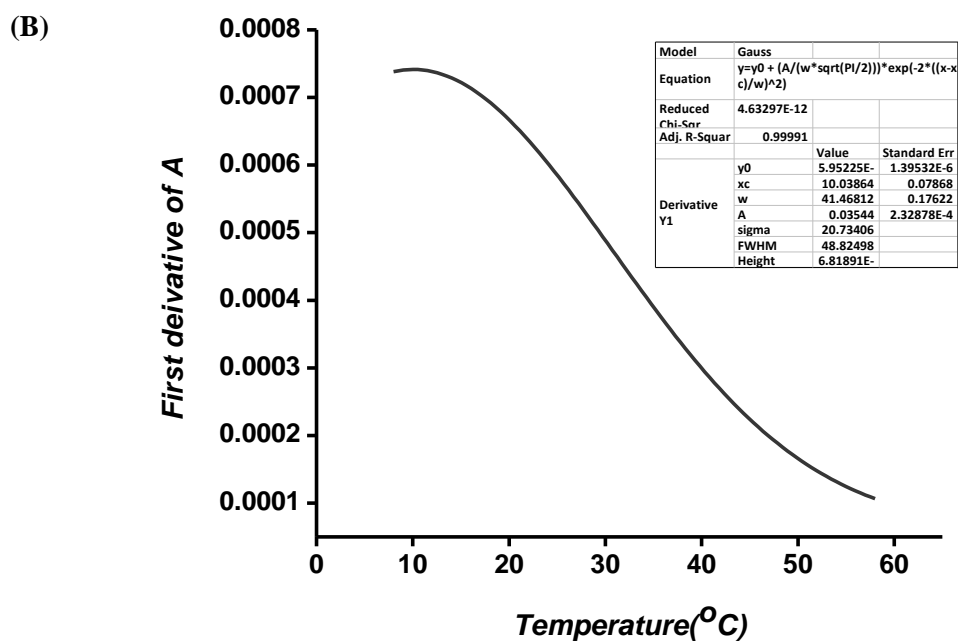

**Figure S77:** Thermal melting curve of duplexes in 40mM phosphate buffer (pH = 7) (A) PMO24-RNA (B) First derivative plot PMO24-RNA

## 9. CD Spectra of duplexes

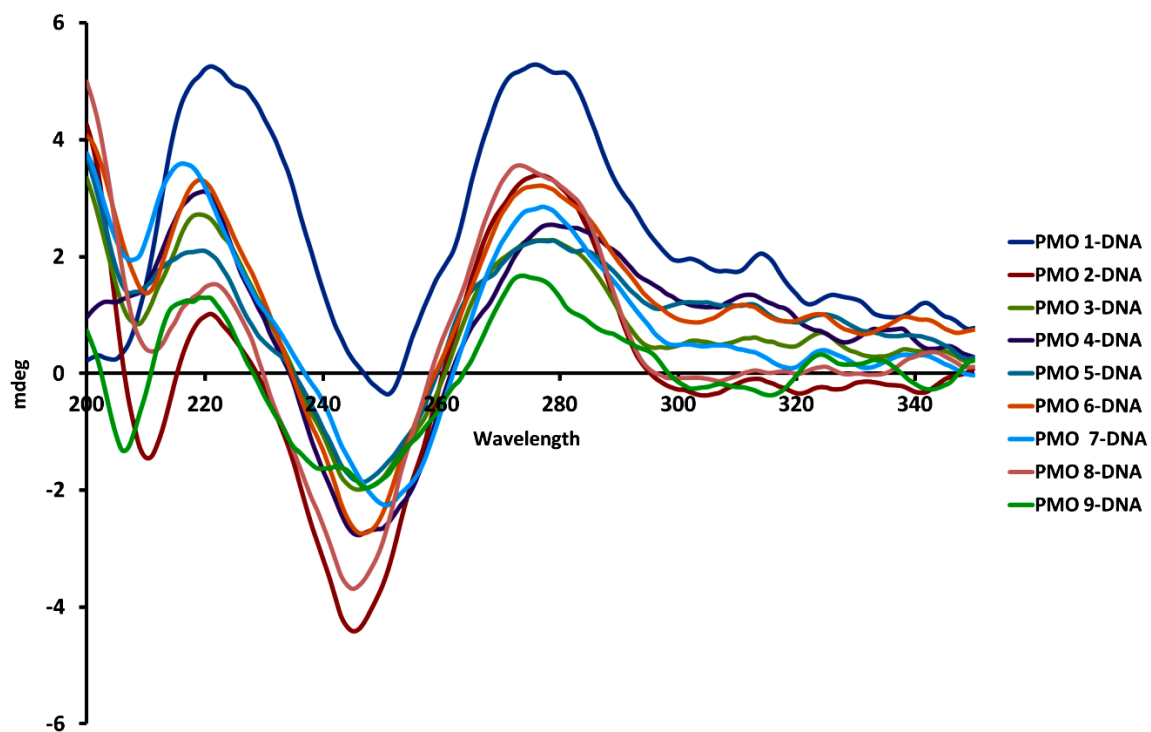

Figure S78: CD-spectra of PMOs (PMO 2-PMO 9, C-alkynes and U-alkynes) with DNA

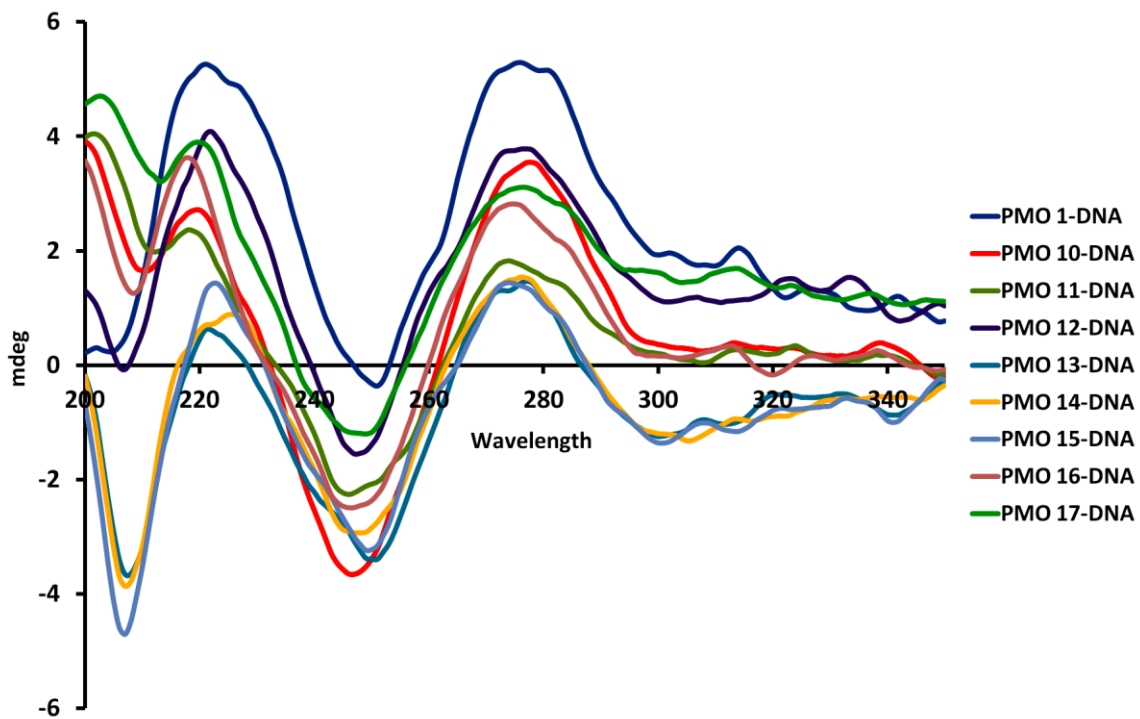

Figure S79: CD-spectra of PMOs (PMO 10-PMO 17, C and U-substituted aryls) with DNA

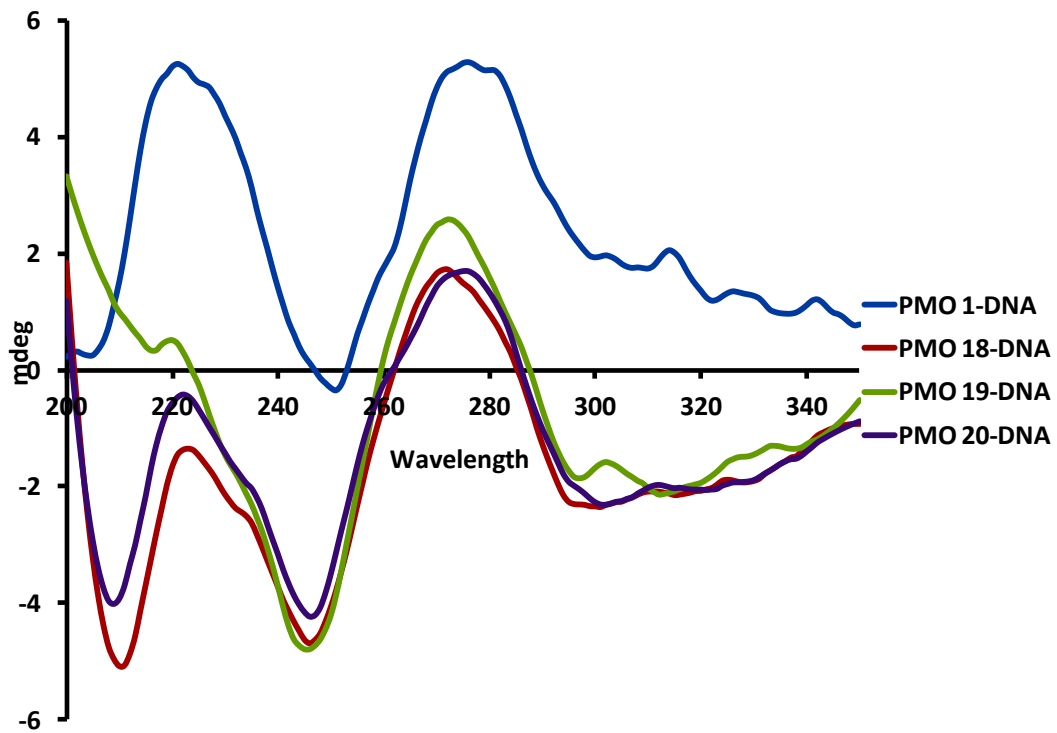

Figure S80: CD-spectra of PMOs (PMO 18, PMO 19, PMO 20, U-iodo, m5C and C-iodo) with DNA

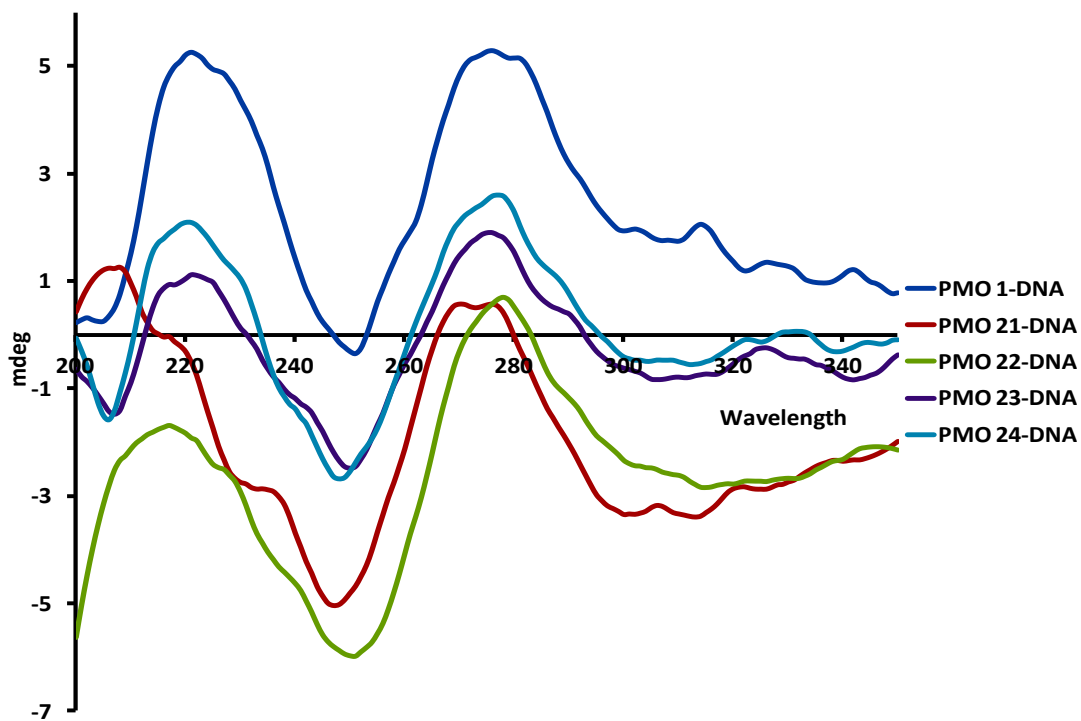

Figure S81: CD-spectra of PMOs (PMO 21-24, mismatch sequences) with DNA



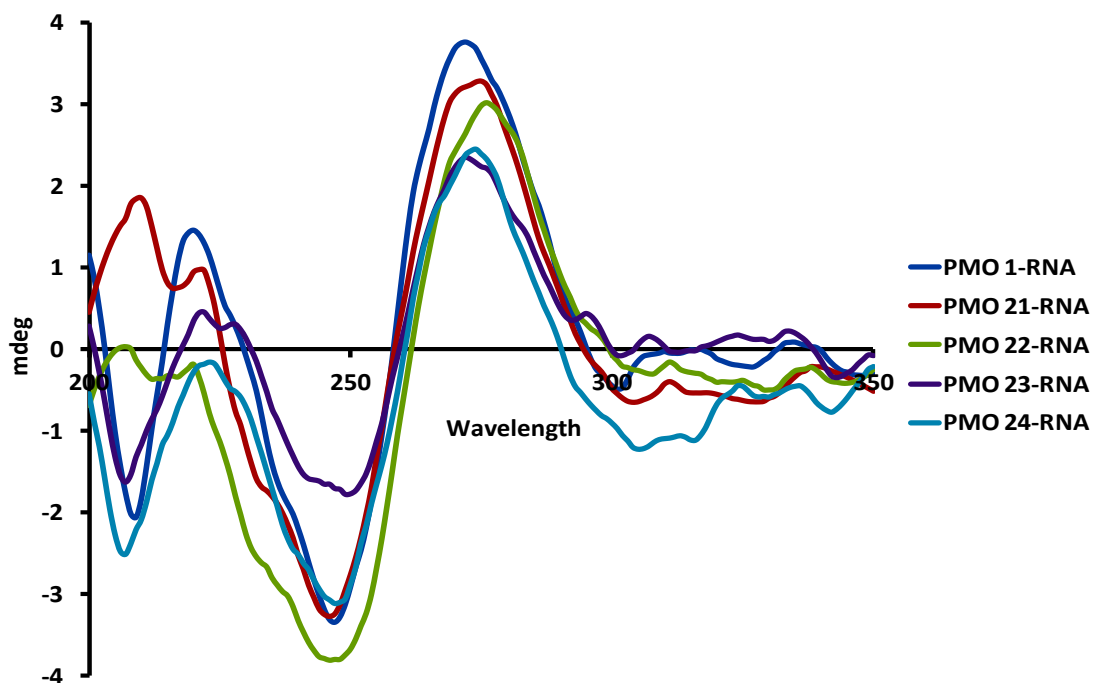

**Figure S82:** CD-spectra of PMOs (PMO 21-24, mismatch sequences) with RNA

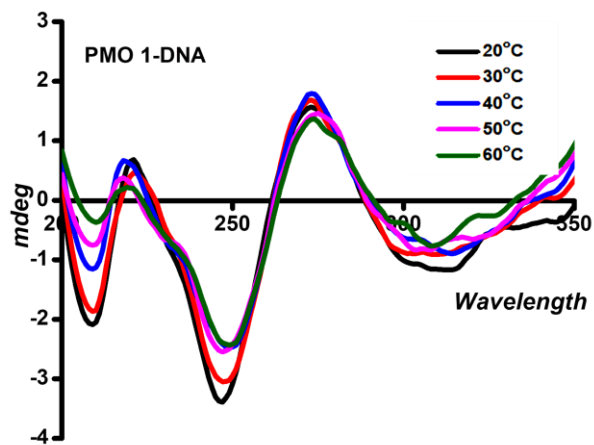

**Figure S83:** Variable temperature CD-spectra of PMO 1 with DNA showing the melting profile. Conditions: 40 mM phosphate buffer (pH 7). The concentration of duplex is 2  $\mu$ M.

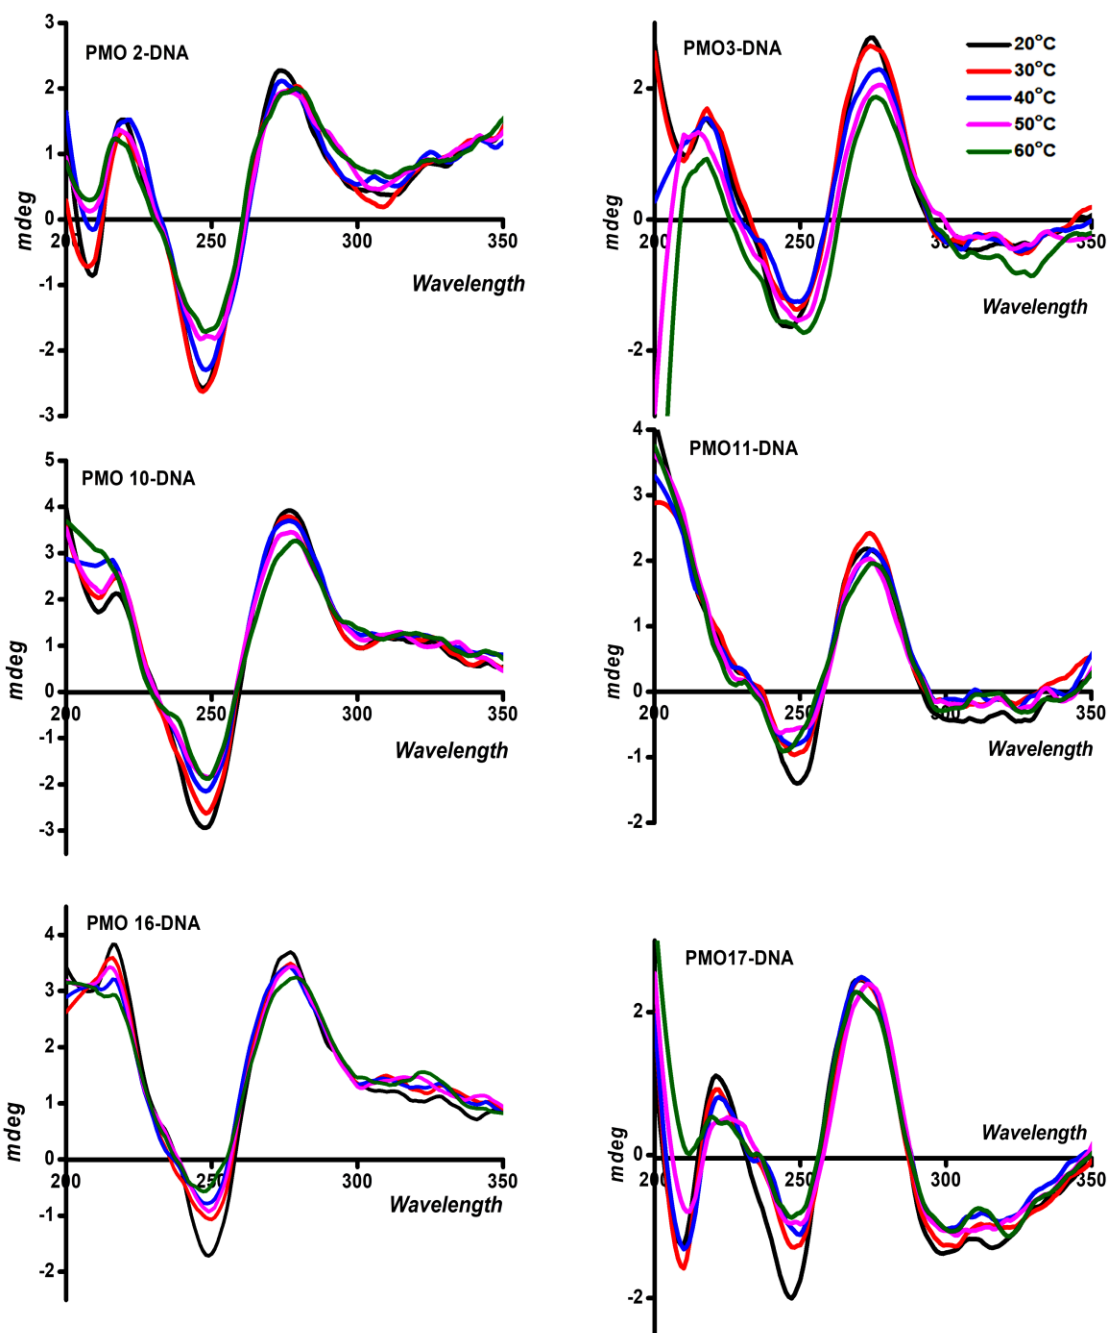

**Figure S84:** Variable temperature CD-spectra of PMOs (PMO 2,3,10,11,16 and 17) with DNA showing the melting profile. Conditions: 40 mM phosphate buffer (pH 7). The concentration of duplex is 2  $\mu$ M.

## 10. X-ray crystallographic data of the compound **1g**

Single crystal of compound **1g** was obtained via slow evaporation from EtOAc.

Crystal data for the compound **1g** was collected at 145 K on a Bruker D8VENTURE Micro-focus diffractometer equipped with PHOTON II Detector, with Mo K $\alpha$  radiation ( $\lambda = 0.71073$  Å), controlled by the APEX3 (v2017.3-0) software package. The raw data were integrated and corrected for Lorentz and polarization effects with the aid of the Bruker APEX III program suite. Absorption corrections were performed by using SADABS. Space groups were assigned by systematic absences (determined by XPREP) and analysis of metric symmetry and were further checked by PLATON for additional symmetry. Structures were solved by direct methods and refined against all data in the reported  $2\theta$  ranges by full-matrix least squares on F<sup>2</sup> using the SHELXL program suite in the OLEX 2 interface. Hydrogen atoms at idealized positions were included in final refinements. The OLEX 2 interface was used for structure visualization as well as for drawing ORTEP plots.

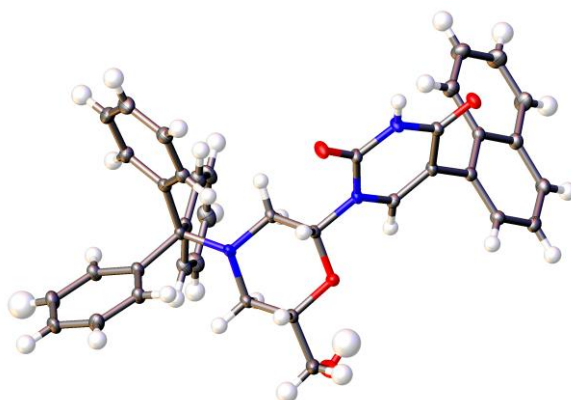

**Figure S85:** Single crystal structure of compound **1g**

| <b>Table S5: Crystal data and structure refinement for mo_SS290422_0ma_a.</b> |                                                                   |
|-------------------------------------------------------------------------------|-------------------------------------------------------------------|
| Identification code                                                           | mo_SS290422_0ma_a                                                 |
| Empirical formula                                                             | C <sub>168</sub> H <sub>164</sub> N <sub>12</sub> O <sub>24</sub> |
| Formula weight                                                                | 2735.10                                                           |
| Temperature/K                                                                 | 144.98                                                            |
| Crystal system                                                                | orthorhombic                                                      |
| Space group                                                                   | P2 <sub>1</sub> 2 <sub>1</sub> 2                                  |
| a/Å                                                                           | 15.094(3)                                                         |
| b/Å                                                                           | 18.129(3)                                                         |
| c/Å                                                                           | 14.040(2)                                                         |
| $\alpha$ /°                                                                   | 90                                                                |
| $\beta$ /°                                                                    | 90                                                                |
| $\gamma$ /°                                                                   | 90                                                                |
| Volume/Å <sup>3</sup>                                                         | 3841.9(12)                                                        |
| Z                                                                             | 1                                                                 |
| $\rho_{\text{calc}}/\text{cm}^3$                                              | 1.182                                                             |

|                                                |                                                               |
|------------------------------------------------|---------------------------------------------------------------|
| $\mu/\text{mm}^{-1}$                           | 0.079                                                         |
| F(000)                                         | 1448.0                                                        |
| Crystal size/ $\text{mm}^3$                    | $0.035 \times 0.032 \times 0.028$                             |
| Radiation                                      | MoK $\alpha$ ( $\lambda = 0.71073$ )                          |
| $2\Theta$ range for data collection/ $^\circ$  | 4.494 to 50.124                                               |
| Index ranges                                   | $-17 \leq h \leq 17, -21 \leq k \leq 21, -14 \leq l \leq 16$  |
| Reflections collected                          | 25718                                                         |
| Independent reflections                        | 6777 [ $R_{\text{int}} = 0.0913, R_{\text{sigma}} = 0.0857$ ] |
| Data/restraints/parameters                     | 6777/0/472                                                    |
| Goodness-of-fit on $F^2$                       | 1.026                                                         |
| Final R indexes [ $I \geq 2\sigma(I)$ ]        | $R_1 = 0.0493, wR_2 = 0.1117$                                 |
| Final R indexes [all data]                     | $R_1 = 0.0805, wR_2 = 0.1314$                                 |
| Largest diff. peak/hole / $e \text{ \AA}^{-3}$ | 0.33/-0.19                                                    |
| Flack parameter                                | -0.5(10)                                                      |
| Deposition Number                              | 2207095                                                       |

## 11. References

1. S. Paul, B. Nandi, S. Pattanayak, S. Sinha, Synthesis of 5-alkynylated uracil–morpholino monomers using Sonogashira coupling. *Tetrahedron Lett.* 2012, **53**, 4179-4183.
2. B. Nandi, S. Pattanayak, S. Paul, S. Sinha, Synthesis of Nucleobase-Functionalized Morpholino-Modified Nucleoside Monomers Through Palladium-Catalyzed Cross-Coupling Reactions. *Eur. J. Org. Chem.* 2013, **7**, 1271–1286.
3. J. Kundu, A. Ghosh, U. Ghosh, A. Das, D. Nagar, S. Pattanayak, A. Ghose, S. Sinha, Synthesis of Phosphorodiamidate Morpholino Oligonucleotides Using Trityl and Fmoc Chemistry in an Automated Oligo Synthesizer. *J. Org. Chem.* 2022, **87**, 9466–9478.
